# Supplementary material for: Development and Genetic Characterization of Peanut Advanced Backcross Lines That Incorporate Root-Knot Nematode Resistance From Arachis stenosperma
Source: Front Plant Sci. 2022 Jan 17;12:785358. doi: 10.3389/fpls.2021.785358 (PMC8801422; doi:10.3389/fpls.2021.785358)
Supplement: Supplementary file 2 [file Data_Sheet_2.xlsx]

## Sheet: Table S1
Primer name	Sequence	Type	SNP	Amplification pattern	Reference
1_Aradu.A02_222671_Rev	TCAGTAACCTCTAAATCTTATCATCCA	AF		ND	This study
1_Aradu.A02_222671_FwdFAM	GAAGGTGACCAAGTTCATGCTAACTTGGTGAGGTAAAACAGAACAG	AS	G	ND	This study
1_Aradu.A02_222671_FwdVIC	GAAGGTCGGAGTCAACGGATTAACTTGGTGAGGTAAAACAGAACAA	AS	A	ND	This study
7_Aradu.A02_1180998_Fwd	TCCGACTTCTGTTGACTGGA	AF		As ≠ Ah	This study
7_Aradu.A02_1180998_RevVIC	GAAGGTCGGAGTCAACGGATTAATACCACACTAGCTCCCATATCC	AS	G	As ≠ Ah	This study
7_Aradu.A02_1180998_RevFAM	GAAGGTGACCAAGTTCATGCTCAATACCACACTAGCTCCCATATCT	AS	A	As ≠ Ah	This study
9_Aradu.A02_1556477_Fwd	AAGGGAGTTCAATCATGGAAAA	AF		As ≠ Ah	This study
9_Aradu.A02_1556477_RevVIC	GAAGGTCGGAGTCAACGGATTCCATGTTTCACCACTAATTCTCC	AS	G	As ≠ Ah	This study
9_Aradu.A02_1556477_RevFAM	GAAGGTGACCAAGTTCATGCTAACCATGTTTCACCACTAATTCTCT	AS	A	As ≠ Ah	This study
13_Aradu.A02_1993223_Rev	CAAGAATCAAATGGGAGTCCA	AF		As ≠ Ah	This study
13_Aradu.A02_1993223_FwdFAM	GAAGGTGACCAAGTTCATGCTACTTCTTGACAATCTTTCTTCCG	AS	G	As ≠ Ah	This study
13_Aradu.A02_1993223_FwdVIC	GAAGGTCGGAGTCAACGGATTCACTTCTTGACAATCTTTCTTCCA	AS	A	As ≠ Ah	This study
14_Aradu.A02_2340663_Rev	TCCATGGTACTCTGCATATCACT	AF		N	This study
14_Aradu.A02_2340663_FwdVIC	GAAGGTCGGAGTCAACGGATTCAACCGTTCAACAAGAGGG	AS	G	N	This study
14_Aradu.A02_2340663_FwdFAM	GAAGGTGACCAAGTTCATGCTCCAACCGTTCAACAAGAGGA	AS	A	N	This study
21_Aradu.A02_2844132_Fwd	CCTCCTAAATAGTACTGGTTCATTCC	AF		As ≠ Ah	This study
21_Aradu.A02_2844132_RevVIC	GAAGGTCGGAGTCAACGGATTGGATCTCCGGCCTCAAC	AS	G	As ≠ Ah	This study
21_Aradu.A02_2844132_RevFAM	GAAGGTGACCAAGTTCATGCTTGGATCTCCGGCCTCAAT	AS	A	As ≠ Ah	This study
Arachis_spp_rep_c2472p187vGT-AF_Fwd	CACATTAATCCAGGCTAACACAA	AF		N	This study
Arachis_spp_rep_c2472p187vGT-AS-RevVIC	GAAGGTCGGAGTCAACGGATTATTTTGGATACTTTTTGGAGACTTGT	AS	A	N	This study
Arachis_spp_rep_c2472p187vGT-AS-RevFAM	GAAGGTGACCAAGTTCATGCTTTGGATACTTTTTGGAGACTTGG	AS	C	N	This study
24_Aradu.A02_3493808_Fwd	TTCAAGTGTTATTCGTTGTTGGA	AF		N	This study
24_Aradu.A02_3493808_RevVIC	GAAGGTCGGAGTCAACGGATTAAACACCAGCCCATGAACTC	AS	G	N	This study
24_Aradu.A02_3493808_RevFAM	GAAGGTGACCAAGTTCATGCTAAACACCAGCCCATGAACTT	AS	A	N	This study
25_Aradu.A02_4883639_Rev	TCCATAAGAATTCTCTGCTAAATCA	AF		N	This study
25_Aradu.A02_4883639_FwdVIC	GAAGGTCGGAGTCAACGGATTAAGCCCCATTCCACCG	AS	G	N	This study
25_Aradu.A02_4883639_FwdFAM	GAAGGTGACCAAGTTCATGCTGAAGCCCCATTCCACCA	AS	A	N	This study
27_Aradu.A02_5238703_Fwd	CGTGCTCTCAAGGAGGTTTT	AF		As ≠ Ah	This study
27_Aradu.A02_5238703_RevVIC	GAAGGTCGGAGTCAACGGATTCACTTGGAGGAGAGCCATTC	AS	G	As ≠ Ah	This study
27_Aradu.A02_5238703_RevFAM	GAAGGTGACCAAGTTCATGCTACACTTGGAGGAGAGCCATTA	AS	T	As ≠ Ah	This study
32_Aradu.A02_5685968_Rev	CTCTGCGCTCGTCTTTGTC	AF		As ≠ Ah	This study
32_Aradu.A02_5685968_FwdFAM	GAAGGTGACCAAGTTCATGCTAACGACCAAATGCTGGTTCT	AS	T	As ≠ Ah	This study
32_Aradu.A02_5685968_FwdVIC	GAAGGTCGGAGTCAACGGATTCGACCAAATGCTGGTTCC	AS	C	As ≠ Ah	This study
35_Aradu.A02_6633078_Rev	GCAGCAGCTTCTTTCAGTTTC	AF		As ≠ Ah	This study
35_Aradu.A02_6633078_FwdVIC	GAAGGTCGGAGTCAACGGATTTCAGAAGGAGAAGAAGTTAGGAGG	AS	G	As ≠ Ah	This study
35_Aradu.A02_6633078_FwdFAM	GAAGGTGACCAAGTTCATGCTGTTCAGAAGGAGAAGAAGTTAGGAGA	AS	A	As ≠ Ah	This study
38_Aradu.A02_8065316_Rev	TTCTCTTCACTGCGGCTTCT	AF		As ≠ Ah	This study
38_Aradu.A02_8065316_FwdFAM	GAAGGTGACCAAGTTCATGCTGCAATAGCGACGACGGG	AS	G	As ≠ Ah	This study
38_Aradu.A02_8065316_FwdVIC	GAAGGTCGGAGTCAACGGATTTAGCAATAGCGACGACGGA	AS	A	As ≠ Ah	This study
39_Aradu.A02_9782639_Rev	GGTGCTGGTTTGGCACTCTA	AF		As ≠ Ah	This study
39_Aradu.A02_9782639_FwdVIC	GAAGGTCGGAGTCAACGGATTTGAAGGGGACAAAGATGAGG	AS	G	As ≠ Ah	This study
39_Aradu.A02_9782639_FwdFAM	GAAGGTGACCAAGTTCATGCTGATGAAGGGGACAAAGATGAGA	AS	A	As ≠ Ah	This study
41_Aradu.A02_14943833_Rev	CAAGTCCTTTGCCTGACCTA	AF		As ≠ Ah	This study
41_Aradu.A02_14943833_FwdFAM	GAAGGTGACCAAGTTCATGCTAAAAAATTACCTTTATGAGAACCAAACT	AS	T	As ≠ Ah	This study
41_Aradu.A02_14943833_FwdVIC	GAAGGTCGGAGTCAACGGATTAAAAATTACCTTTATGAGAACCAAACC	AS	C	As ≠ Ah	This study
43_Aradu.A02_20852585_Fwd	TCCTCCATATTTTTCTTATTGTCAAA	AF		ND	This study
43_Aradu.A02_20852585_RevVIC	GAAGGTCGGAGTCAACGGATTCAACATGACTGAGGTAAAGATGGA	AS	T	ND	This study
43_Aradu.A02_20852585_RevFAM	GAAGGTGACCAAGTTCATGCT AACATGACTGAGGTAAAGATGGG	AS	C	ND	This study
1_Aradu.A02_60755761_Rev	CGTGTTACAACTGCAGAACCA	AF		ND	This study
1_Aradu.A02_60755761_Fwd FAM	GAAGGTGACCAAGTTCATGCTTGTTGGACTTGATGAGATGGG	AS	G	ND	This study
1_Aradu.A02_60755761_Fwd VIC	GAAGGTCGGAGTCAACGGATTCTGTTGGACTTGATGAGATGGA	AS	A	ND	This study
2_Aradu.A02_61325116_Fwd	AACTTCCCCCATTCAGTCCT	AF		ND	This study
2_Aradu.A02_61325116_Rev VIC	GAAGGTCGGAGTCAACGGATTGTCAGGGAAAGATGATAGTTACAACA	AS	T	ND	This study
2_Aradu.A02_61325116_Rev FAM	GAAGGTGACCAAGTTCATGCT TCAGGGAAAGATGATAGTTACAACG	AS	C	ND	This study
3_Aradu.A02_64315367_Rev	AAGGAGGCAAGTCTCCAATAGA	AF		ND	This study
3_Aradu.A02_64315367_Fwd VIC	GAAGGTCGGAGTCAACGGATTTCCACCCTTTGTTGAATGATG	AS	G	ND	This study
3_Aradu.A02_64315367_Fwd FAM	GAAGGTGACCAAGTTCATGCT GTCCACCCTTTGTTGAATGATA	AS	A	ND	This study
4_Aradu.A02_67017415_Fwd	TTGCGCAAGACATCAGCTAC	AF		ND	This study
4_Aradu.A02_67017415_Rev FAM	GAAGGTGACCAAGTTCATGCT TCACGTGTGTGGTTCTTTTCA	AS	T	ND	This study
4_Aradu.A02_67017415_Rev VIC	GAAGGTCGGAGTCAACGGATTCACGTGTGTGGTTCTTTTCG	AS	C	ND	This study
5_Aradu.A02_68581636_Rev	TTCATCGAAGATCCAATTAAGATAGA	AF		ND	This study
5_Aradu.A02_68581636_Fwd VIC	GAAGGTCGGAGTCAACGGATTGCAGAAGTCCCAAGACCG	AS	G	ND	This study
5_Aradu.A02_68581636_Fwd FAM	GAAGGTGACCAAGTTCATGCT AGGCAGAAGTCCCAAGACCT	AS	T	ND	This study
6_Aradu.A02_74722080_Rev	AGACGAGTTCCGGGAATGAT	AF		ND	This study
6_Aradu.A02_74722080_Fwd FAM	GAAGGTGACCAAGTTCATGCT TGTCGACTTTTTGGCATTGAT	AS	T	ND	This study
6_Aradu.A02_74722080_Fwd VIC	GAAGGTCGGAGTCAACGGATTTGTCGACTTTTTGGCATTGAC	AS	C	ND	This study
7_Aradu.A02_75731986_Fwd	CATTGCGGATGCAACTCC	AF		ND	This study
7_Aradu.A02_75731986_Rev FAM	GAAGGTGACCAAGTTCATGCT GGATATAGCGCGTGTTCCC	AS	G	ND	This study
7_Aradu.A02_75731986_Rev VIC	GAAGGTCGGAGTCAACGGATTTGGATATAGCGCGTGTTCCT	AS	A	ND	This study
Nem_Aradu.A02_76738828_Fwd_	CAACTAAGCAACAGGAAAGACG	AF		ND	Leal-Bertioli et al. 2016
Nem_Aradu.A02_76738828_Rev_FAM	GAAGGTGACCAAGTTCATGCTGATCATTGTTGCCGAATCTC	AS	G	ND	Leal-Bertioli et al. 2016
Nem_Aradu.A02_76738828_Rev_VIC	GAAGGTCGGAGTCAACGGATTGATCATTGTTGCCGAATCTT	AS	A	ND	Leal-Bertioli et al. 2016
8_Aradu.A02_77374038_Rev	TCAATTGTTTGTTTCATGATGACC	AF		ND	This study
8_Aradu.A02_77374038_Fwd FAM	GAAGGTGACCAAGTTCATGCT TTGACTGAAGATGGTGGTGG	AS	G	ND	This study
8_Aradu.A02_77374038_Fwd VIC	GAAGGTCGGAGTCAACGGATTGTTTGACTGAAGATGGTGGTGA	AS	A	ND	This study
9_Aradu.A02_78187923_Fwd	TGCACTTGAGAGCCATTAGAAA	AF		ND	This study
9_Aradu.A02_78187923_Rev FAM	GAAGGTGACCAAGTTCATGCT AAATGATGGGAGAAACAACCAA	AS	T	ND	This study
9_Aradu.A02_78187923_Rev VIC	GAAGGTCGGAGTCAACGGATTAAATGATGGGAGAAACAACCAG	AS	C	ND	This study
Aradu.A02-80149907-GA-AF_Fwd	GAATAGGACAAAAATGCAATGTG	AF		N	This study
Aradu.A02-80149907-GA-AS-RevFAM	GAAGGTGACCAAGTTCATGCTACGTGCTTGTCCTCTAAGGC	AS	G	N	This study
Aradu.A02-80149907-GA-AS-RevVIC	GAAGGTCGGAGTCAACGGATTCATACGTGCTTGTCCTCTAAGGT	AS	A	N	This study
10_Aradu.A02_81019015_Fwd	CGAATCTCTCAGCGTATACTTCG	AF		ND	This study
10_Aradu.A02_81019015_Rev FAM	GAAGGTGACCAAGTTCATGCT TGATGTAGAAGACAGGAAACAAAAAA	AS	T	ND	This study
10_Aradu.A02_81019015_Rev VIC	GAAGGTCGGAGTCAACGGATTTGATGTAGAAGACAGGAAACAAAAAG	AS	C	ND	This study
Aradu.A02-81265040-TA-AF_Rev	GCAAGACAATGAATTACAATAAAAGG	AF		As ≠ Ah	This study
Aradu.A02-81265040-TA-AS-FwdVIC	GAAGGTCGGAGTCAACGGATTTTGCATTTGGCACAACCA	AS	A	As ≠ Ah	This study
Aradu.A02-81265040-TA-AS-FwdFAM	GAAGGTGACCAAGTTCATGCTTTTGCATTTGGCACAACCT	AS	T	As ≠ Ah	This study
11_Aradu.A02_81609784_Rev	CCAACAACAAACAAGGTTCCA	AF		ND	This study
11_Aradu.A02_81609784_Fwd VIC	GAAGGTCGGAGTCAACGGATTCCCAGCTTCTTCTTCTCTCCT	AS	T	ND	This study
11_Aradu.A02_81609784_Fwd FAM	GAAGGTGACCAAGTTCATGCT CCAGCTTCTTCTTCTCTCCC	AS	C	ND	This study
12_Aradu.A02_83464195_Fwd	CACACTGGTCAGAGAACATAATGA	AF		ND	This study
12_Aradu.A02_83464195_Rev FAM	GAAGGTGACCAAGTTCATGCT AAAAGAGCTTGTGACTTGTGACC	AS	G	ND	This study
12_Aradu.A02_83464195_Rev VIC	GAAGGTCGGAGTCAACGGATTGTTAAAAGAGCTTGTGACTTGTGACT	AS	A	ND	This study
Nem_Aradu.A02_83608917_Fwd_	TTTGTGGCTGCAATAACTTCA	AF		ND	Leal-Bertioli et al. 2016
Nem_Aradu.A02_83608917_Rev_VIC	GAAGGTCGGAGTCAACGGATTCATGACATTGTAAGTGGCAAAAAC	AS	G	ND	Leal-Bertioli et al. 2016
Nem_Aradu.A02_83608917_Rev_FAM	GAAGGTGACCAAGTTCATGCTCATGACATTGTAAGTGGCAAAAAT	AS	A	ND	Leal-Bertioli et al. 2016
13_Aradu.A02_84350279_Rev	TACCTTAACCACGCCATCG	AF		ND	This study
13_Aradu.A02_84350279_Fwd FAM	GAAGGTGACCAAGTTCATGCT GGGAGTTTGGAAGCGAGG	AS	G	ND	This study
13_Aradu.A02_84350279_Fwd VIC	GAAGGTCGGAGTCAACGGATTGGGAGTTTGGAAGCGAGA	AS	A	ND	This study
Nem_Aradu.A02_84440546_Rev_	GCGATTAATACATTCAACAACCA	AF		As ≠ Ah	Leal-Bertioli et al. 2016
Nem_Aradu.A02_84440546_Fwd_FAM	GAAGGTGACCAAGTTCATGCTGCTCTCCTTCTTGGTGGTTTG	AS	G	As ≠ Ah	Leal-Bertioli et al. 2016
Nem_Aradu.A02_84440546_Fwd_VIC	GAAGGTCGGAGTCAACGGATTGCTCTCCTTCTTGGTGGTTTA	AS	A	As ≠ Ah	Leal-Bertioli et al. 2016
Nem_Aradu.A02_84440594_Rev_	GGAAGCGGATTCCACTCA	AF		N	Leal-Bertioli et al. 2016
Nem_Aradu.A02_84440594_Fwd_FAM	GAAGGTGACCAAGTTCATGCTGAAGTGTGTCATAATCTCCAAAGTG	AS	G	N	Leal-Bertioli et al. 2016
Nem_Aradu.A02_84440594_Fwd_VIC	GAAGGTCGGAGTCAACGGATTCTGAAGTGTGTCATAATCTCCAAAGTA	AS	A	N	Leal-Bertioli et al. 2016
14_Aradu.A02_84895487_Rev	AACTGATCTTTACCCGATTGCT	AF		ND	This study
14_Aradu.A02_84895487_Fwd VIC	GAAGGTCGGAGTCAACGGATTGCTATCCTAAAATGACAGAAAAAGTCAG	AS	G	ND	This study
14_Aradu.A02_84895487_Fwd FAM	GAAGGTGACCAAGTTCATGCT GCTATCCTAAAATGACAGAAAAAGTCAA	AS	A	ND	This study
15_Aradu.A02_85315365_Fwd	TCGGTAATGTGTTGCCTTTG	AF		ND	This study
15_Aradu.A02_85315365_Rev FAM	GAAGGTGACCAAGTTCATGCT AACATTGCATATAACAGCACCTTCT	AS	A	ND	This study
15_Aradu.A02_85315365_Rev VIC	GAAGGTCGGAGTCAACGGATTATTGCATATAACAGCACCTTCG	AS	C	ND	This study
16_Aradu.A02_86218781_Fwd	GACCTGTATTTGCATACTCAGCA	AF		ND	This study
16_Aradu.A02_86218781_Rev VIC	GAAGGTCGGAGTCAACGGATTGGAGTGGTAACTTTGCATTGAA	AS	T	ND	This study
16_Aradu.A02_86218781_Rev FAM	GAAGGTGACCAAGTTCATGCT GGAGTGGTAACTTTGCATTGAG	AS	C	ND	This study
17_Aradu.A02_86870675_Rev	GAGCAGGTCTAAAGAACAAGAAAGA	AF		ND	This study
17_Aradu.A02_86870675_Fwd VIC	GAAGGTCGGAGTCAACGGATTCGTTAGAAAACCACAATTCCAAG	AS	G	ND	This study
17_Aradu.A02_86870675_Fwd FAM	GAAGGTGACCAAGTTCATGCT CGTTAGAAAACCACAATTCCAAA	AS	A	ND	This study
DS_c1614_886_A02_88903581_Rev_	AGCTGAGGAGAACCCCTTTT	AF		ND	Leal-Bertioli et al. 2016
DS_c1614_886_A02_88903581_Fwd_FAM	GAAGGTGACCAAGTTCATGCTCAGATACAGTGACAGATATGAATGGTG	AS	G	ND	Leal-Bertioli et al. 2016
DS_c1614_886_A02_88903581_Fwd_VIC	GAAGGTCGGAGTCAACGGATTTCAGATACAGTGACAGATATGAATGGTA	AS	A	ND	Leal-Bertioli et al. 2016
18_Aradu.A02_91550268_Fwd	AATATAGGAGAAAGAAGTGAGGCAAT	AF		ND	This study
18_Aradu.A02_91550268_Rev FAM	GAAGGTGACCAAGTTCATGCT GCCAACAAGTAAGCACCCAA	AS	T	ND	This study
18_Aradu.A02_91550268_Rev VIC	GAAGGTCGGAGTCAACGGATTGCCAACAAGTAAGCACCCAG	AS	C	ND	This study
19_Aradu.A02_91638679_Rev	TCAGCAACATCGGATCCTC	AF		ND	This study
19_Aradu.A02_91638679_Fwd VIC	GAAGGTCGGAGTCAACGGATTGCATTGAACCAAGCATCG	AS	G	ND	This study
19_Aradu.A02_91638679_Fwd FAM	GAAGGTGACCAAGTTCATGCT GGCATTGAACCAAGCATCA	AS	A	ND	This study
20_Aradu.A02_92077207_Fwd	CTATGACATTGTCGTCCATCG	AF		ND	This study
20_Aradu.A02_92077207_Rev VIC	GAAGGTCGGAGTCAACGGATTAGCCAAATCCATTTTCAAGC	AS	G	ND	This study
20_Aradu.A02_92077207_Rev FAM	GAAGGTGACCAAGTTCATGCT CAGCCAAATCCATTTTCAAGA	AS	T	ND	This study
TOG894171_695_A02_92486807_Rev_	CTTCTGTTGGGGTGTTGGAT	AF		ND	Leal-Bertioli et al. 2016
TOG894171_695_A02_92486807_Fwd_VIC	GAAGGTCGGAGTCAACGGATTYATTAATCAGGCAATAGCAACG	AS	G	ND	Leal-Bertioli et al. 2016
TOG894171_695_A02_92486807_Fwd_FAM	GAAGGTGACCAAGTTCATGCTCTAYATTAATCAGGCAATAGCAACA	AS	A	ND	Leal-Bertioli et al. 2016
Nem_Aradu.A02_92631394_Fwd_	AAGAAATTGGGCGTTTTCAG	AF		N	Leal-Bertioli et al. 2016
Nem_Aradu.A02_92631394_Rev_FAM	GAAGGTGACCAAGTTCATGCTATCCCCATATCTAGTGTCTTCTGC	AS	G	N	Leal-Bertioli et al. 2016
Nem_Aradu.A02_92631394_Rev_VIC	GAAGGTCGGAGTCAACGGATTCAATCCCCATATCTAGTGTCTTCTGT	AS	A	N	Leal-Bertioli et al. 2016
21_Aradu.A02_92983792_Fwd	AGTTTATGATCTCATTATGGAGGAAGA	AF		ND	This study
21_Aradu.A02_92983792_Rev VIC	GAAGGTCGGAGTCAACGGATTCTCTTGGGCAATCAAATTCC	AS	G	ND	This study
21_Aradu.A02_92983792_Rev FAM	GAAGGTGACCAAGTTCATGCT TTATCTCTTGGGCAATCAAATTCT	AS	A	ND	This study
22_Aradu.A02_93061221_Fwd	TTTTCAGATCTTCGTGCGAGT	AF		ND	This study
22_Aradu.A02_93061221_Rev FAM	GAAGGTGACCAAGTTCATGCT GAAGTAGAAGAAACGAGAATTAACGAAC	AS	G	ND	This study
22_Aradu.A02_93061221_Rev VIC	GAAGGTCGGAGTCAACGGATTGAAGTAGAAGAAACGAGAATTAACGAAA	AS	T	ND	This study
23_Aradu.A02_93081600_Fwd	CGATTCAGGAAGAGCTGCAC	AF		ND	This study
23_Aradu.A02_93081600_Rev FAM	GAAGGTGACCAAGTTCATGCT CCTTTCTGTTGAATTGCTTCTCAC	AS	G	ND	This study
23_Aradu.A02_93081600_Rev VIC	GAAGGTCGGAGTCAACGGATTCCTTTCTGTTGAATTGCTTCTCAT	AS	A	ND	This study
24_Aradu.A02_93293318_Fwd	TACTCTTACTACAGAATCCCGATTAAA	AF		ND	This study
24_Aradu.A02_93293318_Rev VIC	GAAGGTCGGAGTCAACGGATTTGGTAATCGGAGCTGAAAAGTATAA	AS	T	ND	This study
24_Aradu.A02_93293318_Rev FAM	GAAGGTGACCAAGTTCATGCT TGGTAATCGGAGCTGAAAAGTATAG	AS	C	ND	This study
25_Aradu.A02_93414423_Fwd	TGCTTCGAGTTTTTGGGAGA	AF		ND	This study
25_Aradu.A02_93414423_Rev FAM	GAAGGTGACCAAGTTCATGCT TCTTATAACACGTTGCAACTAAAGGA	AS	T	ND	This study
25_Aradu.A02_93414423_Rev VIC	GAAGGTCGGAGTCAACGGATTCTTATAACACGTTGCAACTAAAGGG	AS	C	ND	This study
26_Aradu.A02_93471506_Fwd	GATTCATGTTCGATGAGTCCTTC	AF		ND	This study
26_Aradu.A02_93471506_Rev VIC	GAAGGTCGGAGTCAACGGATTAAACGAAGATGACGAAGATAACAAC	AS	G	ND	This study
26_Aradu.A02_93471506_Rev FAM	GAAGGTGACCAAGTTCATGCT AAACGAAGATGACGAAGATAACAAT	AS	A	ND	This study
27_Aradu.A02_93790795_Fwd	AGGCTCCACATCCATTCTCA	AF		ND	This study
27_Aradu.A02_93790795_Rev FAM	GAAGGTGACCAAGTTCATGCT GGTTGTTTGATGATGCCATTT	AS	A	ND	This study
27_Aradu.A02_93790795_Rev VIC	GAAGGTCGGAGTCAACGGATTGGTTGTTTGATGATGCCATTG	AS	C	ND	This study
154_Aradu.A09_2473734_Rev	CCAGTACCCCCAAAGATGTA	AF		As ≠ Ah	This study
154_Aradu.A09_2473734_FwdFAM	GAAGGTGACCAAGTTCATGCTCGATTTAGACCCTTAGTAGTCCCT	AS	T	As ≠ Ah	This study
154_Aradu.A09_2473734_FwdVIC	GAAGGTCGGAGTCAACGGATTCGATTTAGACCCTTAGTAGTCCCC	AS	C	As ≠ Ah	This study
158_Aradu.A09_3927064_Rev	CCAAGCATTGAATAGCTACCAG	AF		ND	This study
158_Aradu.A09_3927064_FwdVIC	GAAGGTCGGAGTCAACGGATTGGGAACTGCTAGCTTGTGTG	AS	G	ND	This study
158_Aradu.A09_3927064_FwdFAM	GAAGGTGACCAAGTTCATGCTGATGGGAACTGCTAGCTTGTGTA	AS	A	ND	This study
159_Aradu.A09_8102594_Fwd	TTTGGACTTGTTCGGTTGCT	AF		ND	This study
159_Aradu.A09_8102594_RevVIC	GAAGGTCGGAGTCAACGGATTGTAGAATTTCTCCTGCACTGTCC	AS	G	ND	This study
159_Aradu.A09_8102594_RevFAM	GAAGGTGACCAAGTTCATGCTTGTAGAATTTCTCCTGCACTGTCA	AS	T	ND	This study
161_Aradu.A09_11528416_Rev	TTGGATCACACTCTATTGACACAA	AF		ND	This study
161_Aradu.A09_11528416_FwdFAM	GAAGGTGACCAAGTTCATGCTTGTGAGACAAAGGAGAAGAACG	AS	G	ND	This study
161_Aradu.A09_11528416_FwdVIC	GAAGGTCGGAGTCAACGGATTAGTGTGAGACAAAGGAGAAGAACA	AS	A	ND	This study
163_Aradu.A09_13870085_Rev	TTGTTTGGTTTTGAATCTCCA	AF		As ≠ Ah	This study
163_Aradu.A09_13870085_FwdVIC	GAAGGTCGGAGTCAACGGATTATTGTTATACATGATTGCCAGTTTG	AS	G	As ≠ Ah	This study
163_Aradu.A09_13870085_FwdFAM	GAAGGTGACCAAGTTCATGCTGATTATTGTTATACATGATTGCCAGTTTA	AS	A	As ≠ Ah	This study
164_Aradu.A09_20334783_Rev	TCGTTCATCGTCGGATTCAT	AF		As ≠ Ah	This study
164_Aradu.A09_20334783_FwdFAM	GAAGGTGACCAAGTTCATGCTAAGAAGACGAACCCCAACAATA	AS	A	As ≠ Ah	This study
164_Aradu.A09_20334783_FwdVIC	GAAGGTCGGAGTCAACGGATTAGAAGACGAACCCCAACAATC	AS	C	As ≠ Ah	This study
165_Aradu.A09_25028543_Fwd	GCTACGACACTTGGTAACAAATACTG	AF		As ≠ Ah	This study
165_Aradu.A09_25028543_RevFAM	GAAGGTGACCAAGTTCATGCTCACAAAATGCAGAGAGAAAAGGTT	AS	A	As ≠ Ah	This study
165_Aradu.A09_25028543_RevVIC	GAAGGTCGGAGTCAACGGATTACAAAATGCAGAGAGAAAAGGTG	AS	C	As ≠ Ah	This study
166_Aradu.A09_30666168_Rev	AAACACAAAATCCCAAAATGC	AF		ND	This study
166_Aradu.A09_30666168_FwdVIC	GAAGGTCGGAGTCAACGGATTGGGAGACGAGAGTTGGTGGT	AS	T	ND	This study
166_Aradu.A09_30666168_FwdFAM	GAAGGTGACCAAGTTCATGCTGGAGACGAGAGTTGGTGGC	AS	C	ND	This study
169_Aradu.A09_40832926_Fwd	GATCACCATACACACAGCTTAACA	AF		N	This study
169_Aradu.A09_40832926_RevVIC	GAAGGTCGGAGTCAACGGATTGCGTGTATGAAGAACCACCTTA	AS	T	N	This study
169_Aradu.A09_40832926_RevFAM	GAAGGTGACCAAGTTCATGCTCGTGTATGAAGAACCACCTTG	AS	C	N	This study
170_Aradu.A09_49729729_Rev	TCTTTGTTTAATGTGTCACCTTGG	AF		ND	This study
170_Aradu.A09_49729729_FwdFAM	GAAGGTGACCAAGTTCATGCTCATGTCAATAGCAAAGAAGATGGA	AS	A	ND	This study
170_Aradu.A09_49729729_FwdVIC	GAAGGTCGGAGTCAACGGATTATGTCAATAGCAAAGAAGATGGC	AS	C	ND	This study
Nem_Aradu.A09_112396428_Fwd_	TATGATTGGCCCCCTAAATG	AF		ND	Leal-Bertioli et al. 2016
Nem_Aradu.A09_112396428_Rev_FAM	GAAGGTGACCAAGTTCATGCTAGCCCCCTCTTCTAAAACAAC	AS	G	ND	Leal-Bertioli et al. 2016
Nem_Aradu.A09_112396428_Rev_VIC	GAAGGTCGGAGTCAACGGATTCAGCCCCCTCTTCTAAAACAAT	AS	A	ND	Leal-Bertioli et al. 2016
Nem_Aradu.A09_112396635_Rev_	CCTGGCTTCATGTTTGATGA	AF		ND	Leal-Bertioli et al. 2016
Nem_Aradu.A09_112396635_Fwd_VIC	GAAGGTCGGAGTCAACGGATTAATGTTACAAAAGGATCCCCAG	AS	G	ND	Leal-Bertioli et al. 2016
Nem_Aradu.A09_112396635_Fwd_FAM	GAAGGTGACCAAGTTCATGCTAATGTTACAAAAGGATCCCCAA	AS	A	ND	Leal-Bertioli et al. 2016
Nem_Aradu.A09_112399976_Rev_	TGACGAGAAGGGGAAAGAAA	AF		ND	Leal-Bertioli et al. 2016
Nem_Aradu.A09_112399976_Fwd_FAM	GAAGGTGACCAAGTTCATGCTAATCCTATTACTAAATCGCTGCTTTT	AS	T	ND	Leal-Bertioli et al. 2016
Nem_Aradu.A09_112399976_Fwd_VIC	GAAGGTCGGAGTCAACGGATTAATCCTATTACTAAATCGCTGCTTTC	AS	C	ND	Leal-Bertioli et al. 2016
Nem_Aradu.A09_112901114_Rev_	CTCCCCAATTTCTCAGCAAG	AF		ND	Leal-Bertioli et al. 2016
Nem_Aradu.A09_112901114_Fwd_FAM	GAAGGTGACCAAGTTCATGCTAGGTGTTGACAGAATTACAACCG	AS	G	ND	Leal-Bertioli et al. 2016
Nem_Aradu.A09_112901114_Fwd_VIC	GAAGGTCGGAGTCAACGGATTGAGGTGTTGACAGAATTACAACCA	AS	A	ND	Leal-Bertioli et al. 2016
Nem_Aradu.A09_114001128_Rev_	TTAAAGCCCCTGCTTTTTCA	AF		ND	Leal-Bertioli et al. 2016
Nem_Aradu.A09_114001128_Fwd_FAM	GAAGGTGACCAAGTTCATGCTATGAGGGAACAACCAGCACTA	AS	A	ND	Leal-Bertioli et al. 2016
Nem_Aradu.A09_114001128_Fwd_VIC	GAAGGTCGGAGTCAACGGATTTGAGGGAACAACCAGCACTC	AS	C	ND	Leal-Bertioli et al. 2016
TOG896942_133_A09_114770700_Fwd_	AAAGAAAGGGCTCCCTAATTTC	AF		ND	Leal-Bertioli et al. 2016
TOG896942_133_A09_114770700_Rev_FAM	GAAGGTGACCAAGTTCATGCTGGGCACAAAAATTCGCTACA	AS	T	ND	Leal-Bertioli et al. 2016
TOG896942_133_A09_114770700_Rev_VIC	GAAGGTCGGAGTCAACGGATTGGCACAAAAATTCGCTACG	AS	C	ND	Leal-Bertioli et al. 2016
DS_c14276_456_A09_115161052_Rev_	AGGAGTCATGGGATGGAATG	AF		ND	Leal-Bertioli et al. 2016
DS_c14276_456_A09_115161052_Fwd_VIC	GAAGGTCGGAGTCAACGGATTTTTGGAAACATCAGCAAAGGA	AS	A	ND	Leal-Bertioli et al. 2016
DS_c14276_456_A09_115161052_Fwd_FAM	GAAGGTGACCAAGTTCATGCTTGGAAACATCAGCAAAGGC	AS	C	ND	Leal-Bertioli et al. 2016
TOG896078_413_A09_116503861_Rev_	GTGGAAGAAATAGCAAAATGGA	AF		ND	Leal-Bertioli et al. 2016
TOG896078_413_A09_116503861_Fwd_VIC	GAAGGTCGGAGTCAACGGATTAAGGAGTTATGGAGATGGTAAGTTTT	AS	T	ND	Leal-Bertioli et al. 2016
TOG896078_413_A09_116503861_Fwd_FAM	GAAGGTGACCAAGTTCATGCTAAGGAGTTATGGAGATGGTAAGTTTC	AS	C	ND	Leal-Bertioli et al. 2016
TOG903757_1119_A09_116533871_Rev_	CCCAAGAAGCAGGGTACTTT	AF		ND	Leal-Bertioli et al. 2016
TOG903757_1119_A09_116533871_Fwd_VIC	GAAGGTCGGAGTCAACGGATTACTTGATTTGATATGAGATTTCCTG	AS	G	ND	Leal-Bertioli et al. 2016
TOG903757_1119_A09_116533871_Fwd_FAM	GAAGGTGACCAAGTTCATGCTCACTTGATTTGATATGAGATTTCCTC	AS	C	ND	Leal-Bertioli et al. 2016

## Sheet: Table S2
Primer name	Sequence	Type	SNP	Amplification pattern
A02_30987480_RKN_CB_Fwd	CAACTCACAGTTTCAAAATTTATAGG	AF		As = Ah
A02_30987480_RKN_CB_FAM	GAAGGTGACCAAGTTCATGCTCGAGAAGCTGAAGGAAATGA	AS	T	As = Ah
A02_30987480_RKN_CB_VIC	GAAGGTCGGAGTCAACGGATTCGAGAAGCTGAAGGAAATGG	AS	C	As = Ah
A02_81019015_RKN_CB_Fwd	TCAGCGTATACTTCGTAGCACAT	AF		As ≠ Ah
A02_81019015_RKN_CB_FAM	GAAGGTGACCAAGTTCATGCTGATGTAGAAGACAGGAAACAAAAAA	AS	T	As ≠ Ah
A02_81019015_RKN_CB_VIC	GAAGGTCGGAGTCAACGGATTGATGTAGAAGACAGGAAACAAAAAG	AS	C	As ≠ Ah
A02_83464195_RKN_CB_Fwd	CACACTGGTCAGAGAACATAATGA	AF		As ≠ Ah
A02_83464195_RKN_CB_FAM	GAAGGTGACCAAGTTCATGCTAAGAGCTTGTGACTTGTGACC	AS	G	As ≠ Ah
A02_83464195_RKN_CB_VIC	GAAGGTCGGAGTCAACGGATTAAAAGAGCTTGTGACTTGTGACT	AS	A	As ≠ Ah
A02_85315365_RKN_CB_Fwd	CGGTAATGTGTTGCCTTTGA	AF		As ≠ Ah
A02_85315365_RKN_CB_FAM	GAAGGTGACCAAGTTCATGCTCATTGCATATAACAGCACCTTCT	AS	A	As ≠ Ah
A02_85315365_RKN_CB_VIC	GAAGGTCGGAGTCAACGGATTTGCATATAACAGCACCTTCG	AS	C	As ≠ Ah
A02_92077207_RKN_CB_Fwd	CTATGACATTGTCGTCCATCG	AF		As ≠ Ah
A02_92077207_RKN_CB_FAM	GAAGGTGACCAAGTTCATGCTAGCCAAATCCATTTTCAAGC	AS	G	As ≠ Ah
A02_92077207_RKN_CB_VIC	GAAGGTCGGAGTCAACGGATTAGCCAAATCCATTTTCAAGA	AS	T	As ≠ Ah
A02_92983792_RKN_CB_Fwd	AGTTTATGATCTCATTATGGAGGAAGA	AF		As ≠ Ah
A02_92983792_RKN_CB_FAM	GAAGGTGACCAAGTTCATGCTCTCTTGGGCAATCAAATTCC	AS	G	As ≠ Ah
A02_92983792_RKN_CB_VIC	GAAGGTCGGAGTCAACGGATTTCTCTTGGGCAATCAAATTCT	AS	A	As ≠ Ah
A05_92835506_RKN_CB_Fwd (A09)	ATTAGATTGCAATGCTTGAGAGG	AF		ND
A05_92835506_RKN_CB_FAM (A09)	GAAGGTGACCAAGTTCATGCTCAGATGTTGATGTGAGGTTTTTC	AS	G	ND
A05_92835506_RKN_CB_VIC (A09)	GAAGGTCGGAGTCAACGGATTCAGATGTTGATGTGAGGTTTTTT	AS	A	ND
A09_14385410_RKN_CB_REVERSE	TCAAAACCCTTCACTTTCATCTT	AF		ND
A09_14385410_RKN_CB_FAM	GAAGGTGACCAAGTTCATGCTTTGGAAGGATGTGGAATGAA	AS	A	ND
A09_14385410_RKN_CB_VIC	GAAGGTCGGAGTCAACGGATTTTGGAAGGATGTGGAATGAC	AS	C	ND
A09_16516448_RKN_CB_REVERSE	CAAACACTCAAAAGGCAAGG	AF		As ≠ Ah
A09_16516448_RKN_CB_FAM	GAAGGTGACCAAGTTCATGCTGAATAGTTTCGCTAGATGTGTTTCT	AS	T	As ≠ Ah
A09_16516448_RKN_CB_VIC	GAAGGTCGGAGTCAACGGATTAATAGTTTCGCTAGATGTGTTTCC	AS	C	As ≠ Ah
A09_25028543_RKN_CB_Fwd	GCTACGACACTTGGTAACAAATAC	AF		ND
A09_25028543_RKN_CB_FAM	GAAGGTGACCAAGTTCATGCTCAAAATGCAGAGAGAAAAGGTT	AS	A	ND
A09_25028543_RKN_CB_VIC	GAAGGTCGGAGTCAACGGATTCAAAATGCAGAGAGAAAAGGTG	AS	C	ND
A09_30830430_RKN_CB_REVERSE	AAGGCAGAAGTTGAGTCTACAAA	AF		ND
A09_30830430_RKN_CB_FAM	GAAGGTGACCAAGTTCATGCTCACAAGGGCTTAACATTGGT	AS	T	ND
A09_30830430_RKN_CB_VIC	GAAGGTCGGAGTCAACGGATTACAAGGGCTTAACATTGGC	AS	C	ND
A09_83181734_RKN_CB_REVERSE	CTTCCATTCCCAACCTTCAA	AF		ND
A09_83181734_RKN_CB_FAM	GAAGGTGACCAAGTTCATGCTGCCCAAAAGCCTTAATCAAT	AS	T	ND
A09_83181734_RKN_CB_VIC	GAAGGTCGGAGTCAACGGATTGCCCAAAAGCCTTAATCAAC	AS	C	ND
A09_112245541_RKN_CB_REVERSE	CAGTTGGTGGTGGCACTG	AF		As ≠ Ah
A09_112245541_RKN_CB_FAM	GAAGGTGACCAAGTTCATGCTAGGCGCTCAAGAAGAAGG	AS	G	As ≠ Ah
A09_112245541_RKN_CB_VIC	GAAGGTCGGAGTCAACGGATTCAGGCGCTCAAGAAGAAGA	AS	A	As ≠ Ah
A09_112309231_RKN_CB_REVERSE	GGAGGAAATTTAGCTTACCTCTTT	AF		As ≠ Ah
A09_112309231_RKN_CB_FAM	GAAGGTGACCAAGTTCATGCTAGAAATCAGAGGAAAACAAGGAT	AS	T	As ≠ Ah
A09_112309231_RKN_CB_VIC	GAAGGTCGGAGTCAACGGATTAGAAATCAGAGGAAAACAAGGAC	AS	C	As ≠ Ah
A09_114515959_RKN_CB_REVERSE	GTTGCATTGCCAGCACTC	AF		As ≠ Ah
A09_114515959_RKN_CB_FAM	GAAGGTGACCAAGTTCATGCTACTGGGGCAAGAATAACTCG	AS	G	As ≠ Ah
A09_114515959_RKN_CB_VIC	GAAGGTCGGAGTCAACGGATTACTGGGGCAAGAATAACTCA	AS	A	As ≠ Ah

## Sheet: Script S1
#Input file:
Geno_BC3F1s_tetra1.txt
#Filtering and replace genotype by numbers BatSten1 (1), Runner-886 (2), different (3):
BatSten1 (Fourth and fifth columns) ¹ Runner-886 (sixth and seventh columns)
AA ≠ AB
AA ≠ BB
AB ≠ AA
AB ≠ BB
BB ≠ AA
BB ≠ AB
awk '{if($4=="AA" && $5=="AA" && $6== "AB" && $7== "AB") print $0}' Geno_BC3F1s_tetra1.txt | perl -lpe "s/AA/1/g" | perl -lpe "s/AB/2/g" | perl -lpe "s/BB/3/g" | perl -lpe "s/NoCall/-/g" > Geno_BC3F1s_tetra1_1.txt &
awk '{if($4=="AA" && $5=="AA" && $6== "BB" && $7== "BB") print $0}' Geno_BC3F1s_tetra1.txt | perl -lpe "s/AA/1/g" | perl -lpe "s/BB/2/g" | perl -lpe "s/AB/3/g" | perl -lpe "s/NoCall/-/g" > Geno_BC3F1s_tetra1_2.txt &
awk '{if($4=="AB" && $5=="AB" && $6== "AA" && $7== "AA") print $0}' Geno_BC3F1s_tetra1.txt | perl -lpe "s/AB/1/g" | perl -lpe "s/AA/2/g" | perl -lpe "s/BB/3/g" | perl -lpe "s/NoCall/-/g" > Geno_BC3F1s_tetra1_3.txt &
awk '{if($4=="AB" && $5=="AB" && $6== "BB" && $7== "BB") print $0}' Geno_BC3F1s_tetra1.txt | perl -lpe "s/AB/1/g" | perl -lpe "s/BB/2/g" | perl -lpe "s/AA/3/g" | perl -lpe "s/NoCall/-/g" > Geno_BC3F1s_tetra1_4.txt &
awk '{if($4=="BB" && $5=="BB" && $6== "AA" && $7== "AA") print $0}' Geno_BC3F1s_tetra1.txt | perl -lpe "s/BB/1/g" | perl -lpe "s/AA/2/g" | perl -lpe "s/AB/3/g" | perl -lpe "s/NoCall/-/g" > Geno_BC3F1s_tetra1_5.txt &
awk '{if($4=="BB" && $5=="BB" && $6== "AB" && $7== "AB") print $0}' Geno_BC3F1s_tetra1.txt | perl -lpe "s/BB/1/g" | perl -lpe "s/AB/2/g" | perl -lpe "s/AA/3/g" | perl -lpe "s/NoCall/-/g" > Geno_BC3F1s_tetra1_6.txt &
#Concatenate files:
head -7 Geno_BC3F1s_tetra1.txt > Geno_BC3F1s_tetra1_All.txt
cat Geno_BC3F1s_tetra1_1.txt Geno_BC3F1s_tetra1_2.txt Geno_BC3F1s_tetra1_3.txt Geno_BC3F1s_tetra1_4.txt Geno_BC3F1s_tetra1_5.txt Geno_BC3F1s_tetra1_6.txt >> Geno_BC3F1s_tetra1_All.txt
#Filter by genetic map (Ballén-Taborda et al. 2019):
head -7 Geno_BC3F1s_tetra1_All.txt > Geno_BC3F1s_tetra1_All_BatStenMap.txt
for i in `cut -f 1 BatStenMap_MarkersList.txt` ; do grep "$i" Geno_BC3F1s_tetra1_All.txt >> Geno_BC3F1s_tetra1_All_BatStenMap.txt ; done

## Sheet: Table S3
Year	Location	RP	F2:3 Male	Pedigree F2:3 Male	Reps	No. of potential BC1F1s	Selected
2016	Athens	TifGP-2	F2:7_Athens_F3:1	[Runner 886 x (A. batizocoi K9484 x A. stenosperma V10309)4x] F2:7	2	165	0
2016	Athens	TifGP-2	F2:13_Athens_F3:1	[Runner 886 x (A. batizocoi K9484 x A. stenosperma V10309)4x] F2:13	2	54	0
2016	Athens	TifGP-2	F2:34_Athens_F3:6	[Runner 886 x (A. batizocoi K9484 x A. stenosperma V10309)4x] F2:34	2	43	1
2016	Athens	TifGP-2	F2:73_Athens_F3:1	[Runner 886 x (A. batizocoi K9484 x A. stenosperma V10309)4x] F2:73	2	104	0
2016	Athens	TifGP-2	F2:167_Athens_F3:1	[Runner 886 x (A. batizocoi K9484 x A. stenosperma V10309)4x] F2:167	2	0	0
2016	Athens	5-646-10	F2:7_Athens_F3:1	[Runner 886 x (A. batizocoi K9484 x A. stenosperma V10309)4x] F2:7	2	88	1
2016	Athens	5-646-10	F2:13_Athens_F3:1	[Runner 886 x (A. batizocoi K9484 x A. stenosperma V10309)4x] F2:13	2	34	0
2016	Athens	5-646-10	F2:34_Athens_F3:6	[Runner 886 x (A. batizocoi K9484 x A. stenosperma V10309)4x] F2:34	2	90	0
2016	Athens	5-646-10	F2:73_Athens_F3:1	[Runner 886 x (A. batizocoi K9484 x A. stenosperma V10309)4x] F2:73	2	166	0
2016	Athens	5-646-10	F2:167_Athens_F3:1	[Runner 886 x (A. batizocoi K9484 x A. stenosperma V10309)4x] F2:167	2	0	0
2016	Tifton	TifGP-2	Tifton_RBS_F2:13 F3:1	[Runner 886 x (A. batizocoi K9484 x A. stenosperma V10309)4x] F2:13	2	18	0
2016	Tifton	5-646-10	Tifton_RBS_F2:13 F3:1	[Runner 886 x (A. batizocoi K9484 x A. stenosperma V10309)4x] F2:13	2	17	0
2016	Tifton	TifGP-2	Tifton_RBS_F2:13 F3:2	[Runner 886 x (A. batizocoi K9484 x A. stenosperma V10309)4x] F2:13	1	7	0
2016	Tifton	5-646-10	Tifton_RBS_F2:13 F3:2	[Runner 886 x (A. batizocoi K9484 x A. stenosperma V10309)4x] F2:13	1	10	0
2016	Tifton	TifGP-2	Tifton_RBS_F2:13 F3:3	[Runner 886 x (A. batizocoi K9484 x A. stenosperma V10309)4x] F2:13	2	12	0
2016	Tifton	5-646-10	Tifton_RBS_F2:13 F3:3	[Runner 886 x (A. batizocoi K9484 x A. stenosperma V10309)4x] F2:13	2	4	0
2016	Tifton	TifGP-2	Tifton_RBS_F2:13 F3:4	[Runner 886 x (A. batizocoi K9484 x A. stenosperma V10309)4x] F2:13	1	5	0
2016	Tifton	5-646-10	Tifton_RBS_F2:13 F3:4	[Runner 886 x (A. batizocoi K9484 x A. stenosperma V10309)4x] F2:13	2	9	0
2016	Tifton	TifGP-2	Tifton_RBS_F2:13 F3:5	[Runner 886 x (A. batizocoi K9484 x A. stenosperma V10309)4x] F2:13	1	1	0
2016	Tifton	5-646-10	Tifton_RBS_F2:13 F3:5	[Runner 886 x (A. batizocoi K9484 x A. stenosperma V10309)4x] F2:13	1	2	0
2016	Tifton	TifGP-2	Tifton_RBS_F2:34 F3:6	[Runner 886 x (A. batizocoi K9484 x A. stenosperma V10309)4x] F2:34	1	9	3
2016	Tifton	5-646-10	Tifton_RBS_F2:34 F3:6	[Runner 886 x (A. batizocoi K9484 x A. stenosperma V10309)4x] F2:34	1	5	3
2016	Tifton	TifGP-2	Tifton_RBS_F2:34 F3:7	[Runner 886 x (A. batizocoi K9484 x A. stenosperma V10309)4x] F2:34	1	9	0
2016	Tifton	5-646-10	Tifton_RBS_F2:34 F3:7	[Runner 886 x (A. batizocoi K9484 x A. stenosperma V10309)4x] F2:34	1	8	0
2016	Tifton	TifGP-2	Tifton_RBS_F2:7 F3:2	[Runner 886 x (A. batizocoi K9484 x A. stenosperma V10309)4x] F2:7	2	39	0
2016	Tifton	5-646-10	Tifton_RBS_F2:7 F3:2	[Runner 886 x (A. batizocoi K9484 x A. stenosperma V10309)4x] F2:7	1	18	0
2016	Tifton	TifGP-2	Tifton_RBS_F2:7 F3:5	[Runner 886 x (A. batizocoi K9484 x A. stenosperma V10309)4x] F2:7	1	11	3
2016	Tifton	5-646-10	Tifton_RBS_F2:7 F3:5	[Runner 886 x (A. batizocoi K9484 x A. stenosperma V10309)4x] F2:7	1	8	6
2016	Tifton	TifGP-2	Tifton_RBS_F2:73 F3:6	[Runner 886 x (A. batizocoi K9484 x A. stenosperma V10309)4x] F2:73	1	10	0
2016	Tifton	5-646-10	Tifton_RBS_F2:73 F3:6	[Runner 886 x (A. batizocoi K9484 x A. stenosperma V10309)4x] F2:73	1	3	0
2016	Tifton	TifGP-2	Tifton_RBS_F2:73 F3:7	[Runner 886 x (A. batizocoi K9484 x A. stenosperma V10309)4x] F2:73	2	9	0
2016	Tifton	5-646-10	Tifton_RBS_F2:73 F3:7	[Runner 886 x (A. batizocoi K9484 x A. stenosperma V10309)4x] F2:73	2	13	0
2016	Tifton	TifGP-2	Tifton_RBS_F2:73 F3:8	[Runner 886 x (A. batizocoi K9484 x A. stenosperma V10309)4x] F2:73	1	8	0
2016	Tifton	5-646-10	Tifton_RBS_F2:73 F3:8	[Runner 886 x (A. batizocoi K9484 x A. stenosperma V10309)4x] F2:73	1	10	0
2016	Tifton	TifGP-2	Tifton_RBS_F2:73 F3:9	[Runner 886 x (A. batizocoi K9484 x A. stenosperma V10309)4x] F2:73	1	1	0
2016	Tifton	5-646-10	Tifton_RBS_F2:73 F3:9	[Runner 886 x (A. batizocoi K9484 x A. stenosperma V10309)4x] F2:73	1	6	0
2016	Tifton	5-646-10	Tifton_RBS_F2:73 F3:10	[Runner 886 x (A. batizocoi K9484 x A. stenosperma V10309)4x] F2:73	2	9	0
2016	Tifton	TifGP-2	Tifton_RBS_F2:73 F3:10	[Runner 886 x (A. batizocoi K9484 x A. stenosperma V10309)4x] F2:73	2	3	0
					Total = 58	Total = 1008	Total = 17

## Sheet: Table S4
Year	Location	RP	BC1F1 Male	Pedigree BC1F1 Male	RKN introgression	Reps	No. of potential BC2F1s	Selected
2017	Athens	5-646-10	BC1F1:49	5-646-10 x [Runner 886 x (A. batizocoi K9484 x A. stenosperma V10309)4x] F2:7_Athens_F3:1	A02_top-sml; A02_bottom	2	7	0
2017	Athens	5-646-10	BC1F1:C2633-2_3	5-646-10 x [Runner 886 x (A. batizocoi K9484 x A. stenosperma V10309)4x] F2:34_Tifton_F3:6	A02_top-L; A02_bottom; A09_top	2	9	1
2017	Athens	TifGp-2	BC1F1:C2641-2_10	TifGP-2 x [Runner 886 x (A. batizocoi K9484 x A. stenosperma V10309)4x] F2:7_Tifton_F3:5	A02_top; A02_bottom; A09_top	1	0	0
2017	Athens	TifGp-2	BC1F1:C2641-2_11	TifGP-2 x [Runner 886 x (A. batizocoi K9484 x A. stenosperma V10309)4x] F2:7_Tifton_F3:5	A02_top; A02_bottom; A09_top	1	1	0
2017	Athens	TifGp-2	BC1F1:C2632-2_1	TifGP-2 x [Runner 886 x (A. batizocoi K9484 x A. stenosperma V10309)4x] F2:34_Tifton_F3:6	A02_top-L; A02_bottom; A09_top	1	2	0
2017	Athens	TifGp-2	BC1F1:C2632-2_2	TifGP-2 x [Runner 886 x (A. batizocoi K9484 x A. stenosperma V10309)4x] F2:34_Tifton_F3:6	A02_top-L; A02_bottom; A09_top	1	4	0
2017	Athens	TifGp-2	BC1F1:03	TifGP-2 x [Runner 886 x (A. batizocoi K9484 x A. stenosperma V10309)4x] F2:34_Athens_F3:1	A02_bottom; A09_top	1	1	0
2017	Tifton	5-646-10	C2642-2_3	5-646-10 x [Runner 886 x (A. batizocoi K9484 x A. stenosperma V10309)4x] F2:7_Tifton_F3:5]_F1:3	A02_top; A02_bottom; A09_top	1	8	5
2017	Tifton	13-1014	C2642-2_3	5-646-10 x [Runner 886 x (A. batizocoi K9484 x A. stenosperma V10309)4x] F2:7_Tifton_F3:5]_F1:3	A02_top; A02_bottom; A09_top	1	3	2
2017	Tifton	13-2113	C2642-2_4	5-646-10 x [Runner 886 x (A. batizocoi K9484 x A. stenosperma V10309)4x] F2:7_Tifton_F3:5]_F1:4	A02_top; A02_bottom; A09_top	1	2	1
2017	Tifton	5-646-10	C2642-2_6	5-646-10 x [Runner 886 x (A. batizocoi K9484 x A. stenosperma V10309)4x] F2:7_Tifton_F3:5]_F1:6	A02_top; A02_bottom; A09_top	1	11	4
2017	Tifton	13-1014	C2642-2_6	5-646-10 x [Runner 886 x (A. batizocoi K9484 x A. stenosperma V10309)4x] F2:7_Tifton_F3:5]_F1:6	A02_top; A02_bottom; A09_top	1	3	2
2017	Tifton	5-646-10	C2642-2_7	5-646-10 x [Runner 886 x (A. batizocoi K9484 x A. stenosperma V10309)4x] F2:7_Tifton_F3:5]_F1:7	A02_top; A02_bottom; A09_top	1	4	2
2017	Tifton	13-2113	C2642-2_7	5-646-10 x [Runner 886 x (A. batizocoi K9484 x A. stenosperma V10309)4x] F2:7_Tifton_F3:5]_F1:7	A02_top; A02_bottom; A09_top	1	6	4
						Total = 16	Total = 61	Total = 21

## Sheet: Table S5
Year	Location	RP	BC2F1 Male	Pedigree BC2F1 Male	RKN introgression	Reps	No. of potential BC3F1s	KASP Genotyping	Affymetrix Genotyping
2018	Athens	5-646-10	BC2F1:C2633-2_3(16)	5-646-10 x BC1F1:C2633-2_3 [5-646-10 x [Runner 886 x (A. batizocoi K9484 x A. stenosperma V10309)4x] F2:34_Tifton_F3:6]	A02 top-L; A02 Bottom; A09 top	4	71	26 (24)	67
2018	Athens	5-646-10	BC2F1_BRD_C0049_Seed1	5-646-10 x BRD_C0010 [5-646-10 x [Runner 886 x (A. batizocoi K9484 x A. stenosperma V10309)4x] F2:7_Tifton_F3:5]_F1:3	A02 top; A02 Bottom; A09 top	2	26	12 (8)	20
2018	Athens	5-646-10	BC2F1_BRD_C0049_Seed2	5-646-10 x BRD_C0010 [5-646-10 x [Runner 886 x (A. batizocoi K9484 x A. stenosperma V10309)4x] F2:7_Tifton_F3:5]_F1:3	A02 top; A02 Bottom; A09 top	2	8	5 (4)	6
2018	Athens	5-646-10	BC2F1_BRD_C0049_Seed7	5-646-10 x BRD_C0010 [5-646-10 x [Runner 886 x (A. batizocoi K9484 x A. stenosperma V10309)4x] F2:7_Tifton_F3:5]_F1:3	A09 top	2	18	9 (2)	5
2018	Athens	5-646-10	BC2F1_BRD_C0049_Seed8	5-646-10 x BRD_C0010 [5-646-10 x [Runner 886 x (A. batizocoi K9484 x A. stenosperma V10309)4x] F2:7_Tifton_F3:5]_F1:3	A02 top; A02 bottom	3	20	9 (3)	11
2018	Athens	13-1014	BC2F1_BRD_C0050_Seed9	13-1014 (= C1805-617-1 xA-06G) x BRD_C0010 [5-646-10 x [Runner 886 x (A. batizocoi K9484 x A. stenosperma V10309)4x] F2:7_Tifton_F3:5]_F1:3	A02 top; A02 bottom	4	85	17 (11)	75
2018	Athens	5-646-10	BC2F1_BRD_C0055_Seed15	5-646-10 x BRD_C0010 [5-646-10 x [Runner 886 x (A. batizocoi K9484 x A. stenosperma V10309)4x] F2:7_Tifton_F3:5]_F1:6	A02 top; A02 Bottom	1	5	3 (0)	0
2018	Athens	5-646-10	BC2F1_BRD_C0055_Seed17	5-646-10 x BRD_C0010 [5-646-10 x [Runner 886 x (A. batizocoi K9484 x A. stenosperma V10309)4x] F2:7_Tifton_F3:5]_F1:6	A09 top	2	50	0	0
2018	Athens	5-646-10	BC2F1_BRD_C0057_Seed28	5-646-10 x BRD_C0010 [5-646-10 x [Runner 886 x (A. batizocoi K9484 x A. stenosperma V10309)4x] F2:7_Tifton_F3:5]_F1:7	A09_top	1	0	0	0
2018	Athens	5-646-10	BC2F1_BRD_C0058_Seed33	13-2113 (= C1805-2-9-16 x C725-19-25) x BRD_C0010 [5-646-10 x [Runner 886 x (A. batizocoi K9484 x A. stenosperma V10309)4x] F2:7_Tifton_F3:5]_F1:7	None	1	0	0	0
2018	Tifton	13-1014	RBS_BC2F1_sd4	5-646-10 x BRD_C0010 [5-646-10 x [Runner 886 x (A. batizocoi K9484 x A. stenosperma V10309)4x] F2:7_Tifton_F3:5]_F1:3	A09_top	1	5	0	5
2018	Tifton	5-646-10	RBS_BC2F1_sd11	13-1014 (= C1805-617-1 xA-06G) x BRD_C0010 [5-646-10 x [Runner 886 x (A. batizocoi K9484 x A. stenosperma V10309)4x] F2:7_Tifton_F3:5]_F1:3	A02_top; A02 bottom; A09_top	1	15	0	15
2018	Tifton	5-646-10	RBS_BC2F1_sd13	13-2113 (= C1805-2-9-16 x C725-19-25) x BRD_C0010 [5-646-10 x [Runner 886 x (A. batizocoi K9484 x A. stenosperma V10309)4x] F2:7_Tifton_F3:5]_F1:4	A02_top; A02 bottom; A09_top	1	16	0	15
2018	Tifton	5-646-10	RBS_BC2F1_sd14	5-646-10 x BRD_C0010 [5-646-10 x [Runner 886 x (A. batizocoi K9484 x A. stenosperma V10309)4x] F2:7_Tifton_F3:5]_F1:6	A09_top	1	13	0	9
2018	Tifton	13-1014	RBS_BC2F1_sd20	5-646-10 x BRD_C0010 [5-646-10 x [Runner 886 x (A. batizocoi K9484 x A. stenosperma V10309)4x] F2:7_Tifton_F3:5]_F1:6	A09_top	1	7	0	1
2018	Tifton	5-646-10	RBS_BC2F1_sd26	13-1014 (= C1805-617-1 xA-06G) x BRD_C0010 [5-646-10 x [Runner 886 x (A. batizocoi K9484 x A. stenosperma V10309)4x] F2:7_Tifton_F3:5]_F1:6	A02_top; A02 bottom; A09_top	1	26	0	21
2018	Tifton	13-1014	RBS_BC2F1_sd27	13-1014 (= C1805-617-1 xA-06G) x BRD_C0010 [5-646-10 x [Runner 886 x (A. batizocoi K9484 x A. stenosperma V10309)4x] F2:7_Tifton_F3:5]_F1:6	A02_top; A02 bottom	1	7	0	4
2018	Tifton	5-646-10	RBS_BC2F1_sd30	5-646-10 x BRD_C0010 [5-646-10 x [Runner 886 x (A. batizocoi K9484 x A. stenosperma V10309)4x] F2:7_Tifton_F3:5]_F1:7	A09_top	1	4	0	2
2018	Tifton	5-646-10	RBS_BC2F1_sd34	13-2113 (= C1805-2-9-16 x C725-19-25) x BRD_C0010 [5-646-10 x [Runner 886 x (A. batizocoi K9484 x A. stenosperma V10309)4x] F2:7_Tifton_F3:5]_F1:7	A02 bottom	1	9	0	9
2018	Tifton	13-1014	RBS_BC2F1_sd35	13-2113 (= C1805-2-9-16 x C725-19-25) x BRD_C0010 [5-646-10 x [Runner 886 x (A. batizocoi K9484 x A. stenosperma V10309)4x] F2:7_Tifton_F3:5]_F1:7	A02_top; A02_bottom	1	1	0	1
2018	Tifton	5-646-10	RBS_BC2F1_sd36	13-2113 (= C1805-2-9-16 x C725-19-25) x BRD_C0010 [5-646-10 x [Runner 886 x (A. batizocoi K9484 x A. stenosperma V10309)4x] F2:7_Tifton_F3:5]_F1:7	None	1	11	0	5
						Total = 33	Total = 397	Total = 81 (52)	Total = 271

## Sheet: Table S6
Year	Location	RP	BC3F2 Male	Pedigree BC3F2 Male	RKN introgression	Reps	No. of potential BC4F1s	Confirmed
2020	Athens	5-646-10	81_BC3F2:C2633-2_3(16)_S14_09	5-646-10 x [ 5-646-10 x BC1F1:C2633-2_3 [5-646-10 x [Runner 886 x (A. batizocoi K9484 x A. stenosperma V10309)4x] F2:34_Tifton_F3:6]]	A02_bottom	1	2	1
2020	Athens	5-646-10	135_BC3F2_RBS_sd20_S3_03	BRD_C0129=13-1014xBRD_C55[5-646-10 x BRD_C10 [5-646-10 x [ 886 x (A. bat K9484 x A. sten V10309)4x] F2:7_T_F3:5]_F1:6]	A09_bottom	1	7	7
2020	Athens	13-1014	81_BC3F2:C2633-2_3(16)_S14_09	5-646-10 x [ 5-646-10 x BC1F1:C2633-2_3 [5-646-10 x [Runner 886 x (A. batizocoi K9484 x A. stenosperma V10309)4x] F2:34_Tifton_F3:6]]	A02_bottom	1	7	6
2020	Athens	13-1014	135_BC3F2_RBS_sd20_S3_03	BRD_C0129=13-1014xBRD_C55[5-646-10 x BRD_C10 [5-646-10 x [ 886 x (A. bat K9484 x A. sten V10309)4x] F2:7_T_F3:5]_F1:6]	A09_bottom	1	7	7
2020	Athens	13-1125 PRKN resistance from A. cardenasii	81_BC3F2:C2633-2_3(16)_S14_09	5-646-10 x [ 5-646-10 x BC1F1:C2633-2_3 [5-646-10 x [Runner 886 x (A. batizocoi K9484 x A. stenosperma V10309)4x] F2:34_Tifton_F3:6]]	A02_bottom	1	3	3
2020	Athens	13-1125 PRKN resistance from A. cardenasii	135_BC3F2_RBS_sd20_S3_03	BRD_C0129=13-1014xBRD_C55[5-646-10 x BRD_C10 [5-646-10 x [ 886 x (A. bat K9484 x A. sten V10309)4x] F2:7_T_F3:5]_F1:6]	A09_bottom	1	1	1
						Total = 6	Total = 27	Total = 25

## Sheet: Table S7
##batch-folder=C:\Users\jacklab\Documents\cballen\BC3F1s_2019\Tetra\T-2
##annotation-file=C:\Users\Public\Documents\AxiomAnalysisSuite\Library\Axiom_Arachis\Axiom_Arachis2.r2.20180803.annot.db
##export-txt-file=C:\Users\jacklab\Documents\cballen\BC3F1s_2019\Tetra\Geno_BC3F1s_tetra.txt
##snp-count=47837
##samples-per-snp=284
probeset_id	Chr_id	Start	Chr	Reassigned physical Position	LG	cM	Reassigned Name		a550846-4392232-041321-624_N23.CEL	a550846-4392232-041321-624_O01.CEL	a550846-4392232-041321-624_O05.CEL	a550846-4392232-041321-624_P03.CEL	a550846-4392232-041321-624_O09.CEL	a550846-4392232-041321-624_P07.CEL	a550846-4392232-041321-624_O13.CEL	a550846-4392232-041321-624_P11.CEL	a550846-4392232-041321-624_P15.CEL	a550846-4392232-041321-624_O17.CEL	a550846-4392232-041321-624_P19.CEL	a550846-4392232-041321-624_O21.CEL	a550846-4392232-041321-624_P23.CEL	a550846-4392232-041321-624_D15.CEL	a550846-4392232-041321-624_L03.CEL	a550846-4392232-041321-624_L13.CEL	a550846-4392232-041321-624_C06.CEL	a550846-4392232-041321-624_F17.CEL	a550846-4392232-041321-624_L15.CEL	a550846-4392232-041321-624_F19.CEL	a550846-4392232-041321-624_L17.CEL	a550846-4392232-041321-624_O19.CEL	a550846-4392232-041321-624_O22.CEL	a550846-4392232-041321-624_L05.CEL	a550846-4392232-041321-624_C17.CEL	a550846-4392232-041321-624_K08.CEL	a550846-4392232-041321-624_H11.CEL	a550846-4392232-041321-624_D03.CEL	a550846-4392232-041321-624_I14.CEL	a550846-4392232-041321-624_O06.CEL	a550846-4392232-041321-624_G22.CEL	a550846-4392232-041321-624_C08.CEL	a550846-4392232-041321-624_I24.CEL	a550846-4392232-041321-624_C03.CEL	a550846-4392232-041321-624_M01.CEL	a550846-4392232-041321-624_E06.CEL	a550846-4392232-041321-624_I06.CEL	a550846-4392232-041321-624_M02.CEL	a550846-4392232-041321-624_A15.CEL	a550846-4392232-041321-624_N11.CEL	a550846-4392232-041321-624_O02.CEL
							True backcross line / Self/Control		Control	Control	Control	Control	Control	Control	Control	Control	Control	Control	Control	Control	Control	True backcross line	True backcross line	True backcross line	True backcross line	True backcross line	True backcross line	True backcross line	True backcross line	True backcross line	True backcross line	True backcross line	True backcross line	True backcross line	True backcross line	True backcross line	True backcross line	True backcross line	True backcross line	True backcross line	True backcross line	True backcross line	True backcross line	True backcross line	True backcross line	True backcross line	True backcross line	True backcross line	True backcross line
							% Wild alleles		100	100	0	0	0.752688	0.645161	0.537634	1.50538	0.645161	0.322581	1.1828	0.645161	0.860215	1.07527	1.1828	1.39785	1.50538	1.50538	1.50538	1.50538	1.50538	1.6129	1.82796	1.93548	2.15054	2.25806	2.7957	2.7957	2.7957	2.7957	3.33333	3.44086	3.65591	3.65591	3.65591	3.65591	3.76344	3.87097	3.97849	4.08602	4.08602
							% Hyp alleles		0	0	100	100	98.9247	98.6022	99.2473	96.4516	99.0323	98.9247	98.7097	99.3548	98.8172	98.8172	98.8172	98.4946	98.0645	98.4946	98.3871	98.2796	98.2796	98.3871	97.957	97.6344	97.3118	97.5269	96.9892	96.129	97.0968	97.0968	96.4516	96.2366	96.2366	94.086	95.6989	96.0215	96.2366	96.0215	95.914	95.8065	95.914
							% Het		0	0	0	0	0.107527	0.107527	0.107527	0.860215	0.322581	0.107527	0.752688	0.322581	0.537634	0.430108	0.860215	1.07527	0.860215	1.07527	1.07527	0.967742	1.07527	1.29032	1.39785	0.967742	1.29032	1.50538	2.04301	2.15054	2.04301	2.04301	2.36559	2.58065	2.68817	2.58065	2.90323	2.90323	2.36559	2.90323	2.25806	2.47312	3.01075
							% Missing data		0	0	0	0	0.322581	0.752688	0.215054	2.04301	0.322581	0.752688	0.107527	0	0.322581	0.107527	0	0.107527	0.430108	0	0.107527	0.215054	0.215054	0	0.215054	0.430108	0.537634	0.215054	0.215054	1.07527	0.107527	0.107527	0.215054	0.322581	0.107527	2.25806	0.645161	0.322581	0	0.107527	0.107527	0.107527	0
							% Wild alleles in Chr A01		100	100	0	0	0	0	0	0	0	0	0.714286	0	0	0	0.714286	0	0	0	0	0	0	0	0	0	0	0	0	0	0	0	7.85714	0	0.714286	0	0	0	7.85714	0	0	0	7.14286
							% Wild alleles in Chr A02		100	100	0	0	0	0	0	0	0	0	0	0	0	0	0	0	1.72414	0	0	0	0	0	0	0	6.89655	0	6.89655	0	0	0	0	0	6.89655	3.44828	1.72414	0	0	0	22.4138	0	0
							% Wild alleles in QTL- A02		100	100	0	0	0	0	0	0	0	0	0	0	0	0	0	0	0	0	0	0	0	0	0	0	30.7692	0	30.7692	0	0	0	0	0	30.7692	7.69231	0	0	0	0	100	0	0
							% Wild alleles in Chr A03		100	100	0	0	1.96078	5.88235	3.92157	3.92157	3.92157	3.92157	0	0	3.92157	1.96078	3.92157	1.96078	3.92157	3.92157	3.92157	3.92157	3.92157	1.96078	3.92157	1.96078	3.92157	3.92157	3.92157	3.92157	3.92157	33.3333	3.92157	29.4118	35.2941	5.88235	37.2549	5.88235	3.92157	3.92157	21.5686	3.92157	7.84314
							% Wild alleles in Chr A04		100	100	0	0	0	0	0	2.63158	0	0	0	0	2.63158	0	0	0	0	0	0	0	0	0	0	0	10.5263	0	0	15.7895	0	10.5263	0	0	0	13.1579	7.89474	0	0	26.3158	0	52.6316	0
							% Wild alleles in Chr A05		100	100	0	0	4.54545	4.54545	4.54545	4.54545	0	0	4.54545	4.54545	4.54545	4.54545	4.54545	4.54545	4.54545	4.54545	4.54545	4.54545	4.54545	4.54545	9.09091	4.54545	9.09091	4.54545	4.54545	4.54545	4.54545	4.54545	4.54545	4.54545	4.54545	9.09091	4.54545	4.54545	4.54545	4.54545	4.54545	4.54545	4.54545
							% Wild alleles in Chr A06		100	100	0	0	2.17391	2.17391	2.17391	8.69565	4.34783	2.17391	0	0	0	10.8696	2.17391	2.17391	15.2174	2.17391	2.17391	2.17391	2.17391	2.17391	2.17391	10.8696	2.17391	2.17391	15.2174	30.4348	2.17391	2.17391	2.17391	15.2174	2.17391	2.17391	2.17391	2.17391	2.17391	2.17391	2.17391	2.17391	2.17391
							% Wild alleles in Chr A07		100	100	0	0	2.27273	2.27273	2.27273	0	0	0	0	0	0	2.27273	2.27273	2.27273	2.27273	2.27273	2.27273	2.27273	2.27273	2.27273	2.27273	2.27273	4.54545	4.54545	2.27273	0	4.54545	4.54545	2.27273	2.27273	4.54545	2.27273	2.27273	2.27273	2.27273	4.54545	2.27273	4.54545	2.27273
							% Wild alleles in Chr A08		100	100	0	0	0	0	0	1.75439	0	0	0	0	0	0	0	0	0	0	0	0	0	0	0	0	0	0	0	0	0	0	0	0	0	0	0	0	0	0	0	0	0
							% Wild alleles in Chr A09		100	100	0	0	0	0	0	5.40541	0	0	16.2162	8.10811	0	0	0	18.9189	2.7027	18.9189	18.9189	18.9189	18.9189	0	0	0	0	0	2.7027	5.40541	0	0	0	0	0	2.7027	0	0	0	0	0	29.7297	0
							% Wild alleles in QTL- A09		100	100	0	0	0	0	0	18.1818	0	0	27.2727	27.2727	0	0	0	27.2727	0	27.2727	27.2727	27.2727	27.2727	0	0	0	0	0	9.09091	0	0	0	0	0	0	0	0	0	0	0	0	100	0
							% Wild alleles in Chr A10		100	100	0	0	0	0	0	0	2.94118	0	0	0	0	0	0	0	0	0	0	0	0	0	0	0	8.82353	0	0	0	0	0	0	0	0	8.82353	0	0	0	0	26.4706	0	0
							% Wild alleles in Chr B01		100	100	0	0	1.75439	0	0	0	0	0	0	0	0	3.50877	8.77193	0	0	0	0	0	0	0	5.26316	8.77193	0	0	0	0	8.77193	0	0	8.77193	0	3.50877	0	8.77193	0	33.3333	0	0	8.77193
							% Wild alleles in Chr B02		100	100	0	0	0	0	0	0	0	0	0	0	0	0	0	0	0	0	0	0	0	0	0	12.1951	0	0	0	0	0	0	0	0	0	0	0	0	0	0	0	0	0
							% Wild alleles in Chr B03		100	100	0	0	2.5	0	0	2.5	2.5	0	0	0	0	0	0	2.5	2.5	2.5	2.5	2.5	2.5	0	0	0	2.5	2.5	0	0	0	2.5	25	2.5	2.5	5	0	25	0	2.5	0	2.5	27.5
							% Wild alleles in Chr B04		100	100	0	0	0	0	0	4.54545	0	0	4.54545	4.54545	13.6364	0	0	0	0	0	0	0	0	0	0	0	0	63.6364	0	0	63.6364	0	0	0	0	0	0	59.0909	63.6364	0	0	0	0
							% Wild alleles in Chr B05		100	100	0	0	0	0	0	0	0	0	0	0	0	0	0	0	0	0	0	0	0	0	0	0	0	0	0	0	0	0	0	0	0	0	0	0	0	0	0	0	0
							% Wild alleles in Chr B06		100	100	0	0	2.27273	0	0	0	0	0	0	0	0	0	0	0	0	0	0	0	0	0	0	0	0	0	0	0	0	0	0	0	2.27273	0	0	0	0	0	2.27273	0	0
							% Wild alleles in Chr B07		100	100	0	0	0	0	0	0	0	0	0	0	0	0	0	0	0	0	0	0	0	0	0	0	0	0	0	0	0	0	12.8205	0	12.8205	0	0	0	12.8205	0	0	0	12.8205
							% Wild alleles in Chr B08		100	100	0	0	0	0	0	2.08333	0	0	0	0	0	0	0	0	0	0	0	0	0	16.6667	16.6667	0	2.08333	0	0	2.08333	2.08333	0	0	4.16667	0	18.75	16.6667	0	0	0	0	0	0
							% Wild alleles in Chr B09		100	100	0	0	0	0	0	0	0	0	4.87805	2.43902	2.43902	0	0	2.43902	0	2.43902	2.43902	2.43902	2.43902	7.31707	0	0	0	0	24.3902	0	0	0	0	0	0	7.31707	0	0	0	0	0	0	0
							% Wild alleles in Chr B10		100	100	0	0	0	0	0	0	0	0	0	0	0	0	0	0	0	0	0	0	0	0	0	0	0	0	0	0	0	0	0	0	0	0	0	0	0	0	0	0	0
							Seed Weight (g)		0.13 - 0.20 (0.17 ± 0.03 b)	0.13 - 0.20 (0.17 ± 0.03 b)	0.51 - 0.94 (0.74 ± 0.17 a)	0.51 - 0.94 (0.74 ± 0.17 a)	0.67 - 1.03 (0.81 ± 0.10 a)	0.67 - 1.03 (0.81 ± 0.10 a)	0.58 - 0.97 (0.84 ± 0.11 a)	0.58 - 0.97 (0.84 ± 0.11 a)	0.59 - 0.91 (0.75 ± 0.12 a)	0.59 - 0.91 (0.75 ± 0.12 a)	-	-	-	0.583	0.305	0.339	0.344	0.745	0.248	0.727	0.164	0.793	0.732	0.22	0.696	0.828	0.363	0.96	0.498	0.808	0.625	0.775	0.841	0.683	0.923	0.614	0.606	0.789	0.898	0.088	1.021
							Seed Length (mm)		11.18 - 14.45 (12.52 ± 0.92 e)	11.18 - 14.45 (12.52 ± 0.92 e)	12.61 - 17.77 (15.07 ± 1.70 c)	12.61 - 17.77 (15.07 ± 1.70 c)	14.30 - 20.22 (17.21 ± 1.87 ab)	14.30 - 20.22 (17.21 ± 1.87 ab)	15.30 - 20.19 (18.04 ± 1.62 a)	15.30 - 20.19 (18.04 ± 1.62 a)	14.23 - 17.66 (16.48 ± 1.22 bc)	14.23 - 17.66 (16.48 ± 1.22 bc)	-	-	-	15.21	12.23	12.22	11.89	14.36	9.22	16.2	12.27	15.66	15.7	12.71	17.42	19.48	11.79	16.38	13.21	18.53	15.84	18.88	18.16	15.78	15.1	15.28	13.65	18.24	19.23	10.69	18.09
							Seed Width (mm)		4.34 - 5.41 (5.05 ± 0.33 c)	4.34 - 5.41 (5.05 ± 0.33 c)	8.4 - 11.26 (10.23 ± 1.01 ab)	8.4 - 11.26 (10.23 ± 1.01 ab)	9.71 - 11.2 (10.43 ± 0.51 ab)	9.71 - 11.2 (10.43 ± 0.51 ab)	8.50 - 11.54 (10.64 ± 0.89 a)	8.50 - 11.54 (10.64 ± 0.89 a)	9.06 - 10.89 (9.81 ± 0.63 b)	9.06 - 10.89 (9.81 ± 0.63 b)	-	-	-	8.73	6.85	7.9	8.24	11.35	7.81	9.78	4.72	10.86	10.56	5.47	10.06	10.92	7.92	11.39	9.91	10.07	8.77	10.07	10.46	10.47	12	8.77	9.46	10.48	11.11	4.04	11.09
							Leaf spots		0	0	0	0	0	0	0	0	1	1	1	1	0	1	0	0	1	0	0	0	0	1	0	0	0	0	1	1	1	0	1	1	1	0	1	0	1	0	0	0	1
							# Pegs (1st measurement)		-	-	3.33	3.33	1.33	1.33	8	8	0.67	0.67	0	0	1.5	8	1	3	0	16	2	10	0	3	8	1	2	5	3	7	2	8	4	1	4	3	7	15	4	9	1	0	3
							# Pegs (2nd measurement)		-	-	16	16	6.33	6.33	8.67	8.67	6.33	6.33	6.33	6.33	14.5	15	10	10	15	11	10	12	1	4	19	3	20	10	8	5	13	15	9	19	5	11	19	16	9	11	7	0	4
							Total # pegs		-	-	19.33	19.33	7.67	7.67	16.67	16.67	7	7	6.33	6.33	16	23	11	13	15	27	12	22	1	7	27	4	22	15	11	12	15	23	13	20	9	14	26	31	13	20	8	0	7
							Architecture		5 - wild	5 - wild	3	3	3.33	3.33	3	3	3	3	3.5	3.5	3.75	3	2.5	2.5	3	3.5	2.5	2.5	2.5	2	1	2.5	3	4	2.5	2.5	3.5	3	3.5	2	3.5	3	3	2	3.5	2	3	Small to tell	3
							Flower color		0	0	1	1	1	1	1	1	1	1	1	1	1	1	1	1	1	1	1	1	1	1	1	1	1	1	1	1	1	1	1	1	1	1	1	1	1	1	1	1	1
							Pedigree		-	-	-	-	-	-	-	-	-	-	-	-	-	BRD_C0111=5-646-10xBRD_C56[13-1014 x BRD_C10 [5-646-10 x [ 886 x (A. bat K9484 x A. sten V10309)4x] F2:7_T_F3:5]_F1:6]	BRD_C0111=5-646-10xBRD_C56[13-1014 x BRD_C10 [5-646-10 x [ 886 x (A. bat K9484 x A. sten V10309)4x] F2:7_T_F3:5]_F1:6]	BRD_C0114=5-646-10xBRD_C58[13-2113x BRD_C10 [5-646-10 x [ 886 x (A. bat K9484 x A. sten V10309)4x] F2:7_T_F3:5]_F1:7]	5-646-10 x [5-646-10 x BRD_C0010 [5-646-10 x [Runner 886 x (A. batizocoi K9484 x A. stenosperma V10309)4x] F2:7_Tifton_F3:5]_F1:3]	BRD_C0114=5-646-10xBRD_C58[13-2113x BRD_C10 [5-646-10 x [ 886 x (A. bat K9484 x A. sten V10309)4x] F2:7_T_F3:5]_F1:7]	BRD_C0114=5-646-10xBRD_C58[13-2113x BRD_C10 [5-646-10 x [ 886 x (A. bat K9484 x A. sten V10309)4x] F2:7_T_F3:5]_F1:7]	BRD_C0114=5-646-10xBRD_C58[13-2113x BRD_C10 [5-646-10 x [ 886 x (A. bat K9484 x A. sten V10309)4x] F2:7_T_F3:5]_F1:7]	BRD_C0114=5-646-10xBRD_C58[13-2113x BRD_C10 [5-646-10 x [ 886 x (A. bat K9484 x A. sten V10309)4x] F2:7_T_F3:5]_F1:7]	5-646-10 x [ 5-646-10 x BC1F1:C2633-2_3 [5-646-10 x [Runner 886 x (A. batizocoi K9484 x A. stenosperma V10309)4x] F2:34_Tifton_F3:6]]	BRD_C0109=5-646-10xBRD_C50[13-1014 x BRD_C10 [5-646-10 x [ 886 x (A. bat K9484 x A. sten V10309)4x] F2:7_T_F3:5]_F1:3]	BRD_C0111=5-646-10xBRD_C56[13-1014 x BRD_C10 [5-646-10 x [ 886 x (A. bat K9484 x A. sten V10309)4x] F2:7_T_F3:5]_F1:6]	5-646-10 x [ 5-646-10 x BC1F1:C2633-2_3 [5-646-10 x [Runner 886 x (A. batizocoi K9484 x A. stenosperma V10309)4x] F2:34_Tifton_F3:6]]	13-1014 x [13-1014 (= C1805-617-1 x GA-06G) x BRD_C0010 [5-646-10 x [Runner 886 x (A. batizocoi K9484 x A. stenosperma V10309)4x] F2:7_Tifton_F3:5]_F1:3]	BRD_C0115=5-646-10xBRD_C55[5-646-10 x BRD_C10 [5-646-10 x [ 886 x (A. bat K9484 x A. sten V10309)4x] F2:7_T_F3:5]_F1:6]	BRD_C0111=5-646-10xBRD_C56[13-1014 x BRD_C10 [5-646-10 x [ 886 x (A. bat K9484 x A. sten V10309)4x] F2:7_T_F3:5]_F1:6]	13-1014 x [13-1014 (= C1805-617-1 x GA-06G) x BRD_C0010 [5-646-10 x [Runner 886 x (A. batizocoi K9484 x A. stenosperma V10309)4x] F2:7_Tifton_F3:5]_F1:3]	13-1014 x [13-1014 (= C1805-617-1 x GA-06G) x BRD_C0010 [5-646-10 x [Runner 886 x (A. batizocoi K9484 x A. stenosperma V10309)4x] F2:7_Tifton_F3:5]_F1:3]	13-1014 x [13-1014 (= C1805-617-1 x GA-06G) x BRD_C0010 [5-646-10 x [Runner 886 x (A. batizocoi K9484 x A. stenosperma V10309)4x] F2:7_Tifton_F3:5]_F1:3]	5-646-10 x [5-646-10 x BRD_C0010 [5-646-10 x [Runner 886 x (A. batizocoi K9484 x A. stenosperma V10309)4x] F2:7_Tifton_F3:5]_F1:3]	13-1014 x [13-1014 (= C1805-617-1 x GA-06G) x BRD_C0010 [5-646-10 x [Runner 886 x (A. batizocoi K9484 x A. stenosperma V10309)4x] F2:7_Tifton_F3:5]_F1:3]	5-646-10 x [ 5-646-10 x BC1F1:C2633-2_3 [5-646-10 x [Runner 886 x (A. batizocoi K9484 x A. stenosperma V10309)4x] F2:34_Tifton_F3:6]]	5-646-10 x [ 5-646-10 x BC1F1:C2633-2_3 [5-646-10 x [Runner 886 x (A. batizocoi K9484 x A. stenosperma V10309)4x] F2:34_Tifton_F3:6]]	13-1014 x [13-1014 (= C1805-617-1 x GA-06G) x BRD_C0010 [5-646-10 x [Runner 886 x (A. batizocoi K9484 x A. stenosperma V10309)4x] F2:7_Tifton_F3:5]_F1:3]	13-1014 x [13-1014 (= C1805-617-1 x GA-06G) x BRD_C0010 [5-646-10 x [Runner 886 x (A. batizocoi K9484 x A. stenosperma V10309)4x] F2:7_Tifton_F3:5]_F1:3]	13-1014 x [13-1014 (= C1805-617-1 x GA-06G) x BRD_C0010 [5-646-10 x [Runner 886 x (A. batizocoi K9484 x A. stenosperma V10309)4x] F2:7_Tifton_F3:5]_F1:3]	5-646-10 x [ 5-646-10 x BC1F1:C2633-2_3 [5-646-10 x [Runner 886 x (A. batizocoi K9484 x A. stenosperma V10309)4x] F2:34_Tifton_F3:6]]	BRD_C0129=13-1014xBRD_C55[5-646-10 x BRD_C10 [5-646-10 x [ 886 x (A. bat K9484 x A. sten V10309)4x] F2:7_T_F3:5]_F1:6]	13-1014 x [13-1014 (= C1805-617-1 x GA-06G) x BRD_C0010 [5-646-10 x [Runner 886 x (A. batizocoi K9484 x A. stenosperma V10309)4x] F2:7_Tifton_F3:5]_F1:3]
							Numer of harvested pods		-	-	-	-	-	-	-	-	-	-	-	-	-	21	19	13	28	12	17	23	9	33	21	4	38	31	25	27	40	40	34	30	25	40	18	18	41	28	84	0	16
probeset_id	Chr_id	Start	Chr	Reassigned physical Position	LG	cM	Reassigned Name	KASP Assays (TableS2)	Batsten1-1	Batsten1-2	A. hypogaea Runner886 -1	A. hypogaea Runner886 -2	A. hypogaea 5-646-10 -1	A. hypogaea 5-646-10 -2	A. hypogaea 13-1014 -1	A. hypogaea 13-1014 -2	A. hypogaea TifGp-2 -1	A. hypogaea TifGp-2 -2	A. hypogaea Tifguard -1	A. hypogaea Tifguard -2	A. hypogaea Tifrunner	BC3F1_RBS_sd26_S7	BC3F1_RBS_sd26_S20	BC3F1_RBS_sd36_S3	BC3F1_BRD_C0049_Seed7_S10	BC3F1_RBS_sd36_S1	BC3F1_RBS_sd36_S4	BC3F1_RBS_sd36_S2	BC3F1_RBS_sd36_S7	BC3F1:C2633-2_3(16)_S70	BC3F1_RBS_sd11_S7	BC3F1_RBS_sd26_S21	BC3F1:C2633-2_3(16)_S55	BC3F1_BRD_C0050_Seed9_S57	BC3F1_RBS_sd14_S9	BC3F1_RBS_sd26_S1	BC3F1_BRD_C0050_Seed9_S44	BC3F1_BRD_C0050_Seed9_S84	BC3F1_BRD_C0050_Seed9_S33	BC3F1_BRD_C0049_Seed7_S18	BC3F1_BRD_C0050_Seed9_S53	BC3F1:C2633-2_3(16)_S28	BC3F1:C2633-2_3(16)_S37	BC3F1_BRD_C0050_Seed9_S13	BC3F1_BRD_C0050_Seed9_S37	BC3F1_BRD_C0050_Seed9_S66	BC3F1:C2633-2_3(16)_S14	BC3F1_RBS_sd20_S3	BC3F1_BRD_C0050_Seed9_S82
AX-147265635	Aradu.A01	595640	Aradu.A01	595640	A01	0	A01_595640_Sten	-	1	1	2	2	2	2	2	2	2	2	2	2	2	2	2	2	2	2	2	2	2	2	2	2	2	2	2	2	2	2	2	2	2	2	2	2	2	2	2	2	2
AX-147207744	Aradu.A01	773107	Aradu.A01	773107	A01	10.655	A01_773107_Sten	-	1	1	2	2	2	2	2	2	2	2	2	2	2	2	2	2	2	2	2	2	2	2	2	2	2	2	2	2	2	2	2	2	2	2	2	2	2	2	2	2	2
AX-147207751	Aradu.A01	795710	Aradu.A01	795710	A01	12.227	A01_795710_Sten	-	1	1	2	2	2	2	2	2	2	2	2	2	2	2	2	2	2	2	2	2	2	2	2	2	2	2	2	2	2	2	2	2	2	2	2	2	2	2	2	2	2
AX-147207741	Aradu.A01	748457	Aradu.A01	748457	A01	14.058	A01_748457_Sten	-	1	1	2	2	2	2	2	2	2	2	2	2	2	2	2	2	2	2	2	2	2	2	2	2	2	2	2	2	2	2	2	2	2	2	2	2	2	2	2	2	2
AX-147207696	Aradu.A01	567530	Aradu.A01	567530	A01	15.092	A01_567530_Sten	-	1	1	2	2	2	2	2	2	2	2	2	2	2	2	2	2	2	2	2	2	2	2	2	2	2	2	2	2	2	2	2	2	2	2	2	2	2	2	2	2	2
AX-147207739	Aradu.A01	738171	Aradu.A01	738171	A01	15.605	A01_738171_Sten	-	1	1	2	2	2	2	2	2	2	2	2	2	2	2	2	2	2	2	2	2	2	2	2	2	2	2	2	2	2	2	2	2	2	2	2	-	2	2	2	2	2
AX-147207768	Aradu.A01	922352	Aradu.A01	922352	A01	18.976	A01_922352_Sten	-	1	1	2	2	2	2	2	2	2	2	2	2	2	2	2	2	2	2	2	2	2	2	2	2	2	2	2	2	2	2	2	2	2	2	2	2	2	2	2	2	2
AX-147207766	Aradu.A01	907490	Aradu.A01	907490	A01	19.283	A01_907490_Sten	-	1	1	2	2	2	2	2	2	2	2	2	2	2	2	2	2	2	2	2	2	2	2	2	2	2	2	2	2	2	2	2	2	2	2	2	2	2	2	2	2	2
AX-147207810	Aradu.A01	1117391	Aradu.A01	1117391	A01	20.525	A01_1117391_Sten	-	1	1	2	2	2	2	2	2	2	2	2	2	2	2	2	2	2	2	2	2	2	2	2	2	2	2	2	2	2	2	2	2	2	2	2	2	2	2	2	2	2
AX-147207796	Aradu.A01	1043415	Aradu.A01	1043415	A01	22.068	A01_1043415_Sten	-	1	1	2	2	2	2	2	2	2	2	2	2	2	2	2	2	2	2	2	2	2	2	2	2	2	2	2	2	2	2	2	2	2	2	2	2	2	2	2	2	2
AX-147207792	Aradu.A01	1040768	Aradu.A01	1040768	A01	24.035	A01_1040768_Sten	-	1	1	2	2	2	2	2	2	2	2	2	2	2	2	2	2	2	2	2	2	2	2	2	2	2	2	2	2	2	2	2	2	2	2	2	2	2	2	2	2	2
AX-147207833	Aradu.A01	1231537	Aradu.A01	1231537	A01	26.731	A01_1231537_Sten	-	1	1	2	2	2	2	2	2	2	2	2	2	2	2	2	2	2	2	2	2	2	2	2	2	2	2	2	2	2	2	2	2	2	2	2	2	2	2	2	2	2
AX-147207859	Aradu.A01	1397197	Aradu.A01	1397197	A01	29.085	A01_1397197_Sten	-	1	1	2	2	2	2	2	2	2	2	2	2	2	2	2	2	2	2	2	2	2	2	2	2	2	2	2	2	2	2	2	2	2	2	2	2	2	2	2	2	2
AX-147207865	Aradu.A01	1399658	Aradu.A01	1399658	A01	31.231	A01_1399658_Sten	-	1	1	2	2	2	2	2	2	2	2	2	2	2	2	2	2	2	2	2	2	2	2	2	2	2	2	2	2	2	2	2	2	2	2	2	2	2	2	2	2	2
AX-147207867	Aradu.A01	1427181	Aradu.A01	1427181	A01	32.708	A01_1427181_Sten	-	1	1	2	2	2	2	2	2	2	2	2	2	2	2	2	2	2	2	2	2	2	2	2	2	2	2	2	2	2	2	2	2	2	2	2	2	2	2	2	2	2
AX-147207869	Aradu.A01	1448059	Aradu.A01	1448059	A01	34.525	A01_1448059_Sten	-	1	1	2	2	2	2	2	2	2	2	2	2	2	2	2	2	2	2	2	2	2	2	2	2	2	2	2	2	2	2	2	2	2	2	2	2	2	2	2	2	2
AX-147207942	Aradu.A01	1705064	Aradu.A01	1705064	A01	36.779	A01_1705064_Sten	-	1	1	2	2	2	2	2	2	2	2	2	2	2	2	2	2	2	2	2	2	2	2	2	2	2	2	2	2	2	2	2	2	2	2	2	2	2	2	2	2	2
AX-147265676	Aradu.A01	1665696	Aradu.A01	1665696	A01	37.916	A01_1665696_Sten	-	1	1	2	2	2	2	2	2	2	2	2	2	2	2	2	2	2	2	2	2	2	2	2	2	2	2	2	2	2	2	2	2	2	2	2	2	2	2	2	2	2
AX-147207949	Aradu.A01	1724608	Aradu.A01	1724608	A01	39.726	A01_1724608_Sten	-	1	1	2	2	2	2	2	2	2	2	2	2	2	2	2	2	2	2	2	2	2	2	2	2	2	2	2	2	2	2	2	2	2	2	2	2	2	2	2	2	2
AX-147207952	Aradu.A01	1734212	Aradu.A01	1734212	A01	41.081	A01_1734212_Sten	-	1	1	2	2	2	2	2	2	2	2	2	2	2	2	2	2	2	2	2	2	2	2	2	2	2	2	2	2	2	2	2	2	2	2	2	2	2	2	2	2	2
AX-147207954	Aradu.A01	1739782	Aradu.A01	1739782	A01	42.055	A01_1739782_Sten	-	1	1	2	2	2	2	2	2	2	2	2	2	2	2	2	2	2	2	2	2	2	2	2	2	2	2	2	2	2	2	2	2	2	2	2	2	2	2	2	2	2
AX-147207960	Aradu.A01	1777026	Aradu.A01	1777026	A01	43.086	A01_1777026_Sten	-	1	1	2	2	2	2	2	2	2	2	2	2	2	2	2	2	2	2	2	2	2	2	2	2	2	2	2	2	2	2	2	2	2	2	2	2	2	2	2	2	2
AX-147207989	Aradu.A01	1845128	Aradu.A01	1845128	A01	44.117	A01_1845128_Sten	-	1	1	2	2	2	2	2	2	2	2	2	2	2	2	2	2	2	2	2	2	2	2	2	2	2	2	2	2	2	2	2	2	2	2	2	2	2	2	2	2	2
AX-147207971	Aradu.A01	1788137	Aradu.A01	1788137	A01	44.383	A01_1788137_Sten	-	1	1	2	2	2	2	2	2	2	2	2	2	2	2	2	2	2	2	2	2	2	2	2	2	2	2	2	2	2	2	2	2	2	2	2	2	2	2	2	2	2
AX-147207965	Aradu.A01	1783428	Aradu.A01	1783428	A01	44.964	A01_1783428_Sten	-	1	1	2	2	2	2	2	2	2	2	2	2	2	2	2	2	2	2	2	2	2	2	2	2	2	2	2	2	2	2	2	2	2	2	2	2	2	2	2	2	2
AX-147207985	Aradu.A01	1833130	Aradu.A01	1833130	A01	45.918	A01_1833130_Sten	-	1	1	2	2	2	2	2	2	2	2	2	2	2	2	2	2	2	2	2	2	2	2	2	2	2	2	2	2	2	2	2	2	2	2	2	2	2	2	2	2	2
AX-147208042	Aradu.A01	1984932	Aradu.A01	1984932	A01	48.401	A01_1984932_Sten	-	1	1	2	2	2	2	2	2	2	2	2	2	2	2	2	2	2	2	2	2	2	2	2	2	2	2	2	2	2	2	2	2	2	2	2	2	2	2	2	2	2
AX-147208055	Aradu.A01	2010809	Aradu.A01	2010809	A01	49.001	A01_2010809_Sten	-	1	1	2	2	2	2	2	2	2	2	2	2	2	2	2	2	2	2	2	2	2	2	2	2	2	2	2	2	2	2	2	2	2	2	2	2	2	2	2	2	2
AX-147208027	Aradu.A01	1979329	Aradu.A01	1979329	A01	49.026	A01_1979329_Sten	-	1	1	2	2	2	2	2	2	2	-	2	2	2	2	2	2	2	2	2	2	2	2	2	2	2	2	2	2	2	2	2	2	2	2	2	2	2	2	2	2	2
AX-147208038	Aradu.A01	1984099	Aradu.A01	1984099	A01	50.055	A01_1984099_Sten	-	1	1	2	2	2	2	2	2	2	2	2	2	2	2	2	2	2	2	2	2	2	2	2	2	2	2	2	2	2	2	2	2	2	2	2	2	2	2	2	2	2
AX-147208012	Aradu.A01	1916852	Aradu.A01	1916852	A01	50.67	A01_1916852_Sten	-	1	1	2	2	2	2	2	2	2	2	2	2	2	2	2	2	2	2	2	2	2	2	2	2	2	2	2	2	2	2	2	2	2	2	2	2	2	2	2	2	2
AX-147208016	Aradu.A01	1950993	Aradu.A01	1950993	A01	52.149	A01_1950993_Sten	-	1	1	2	2	2	2	2	2	2	2	2	2	2	2	2	2	2	2	2	2	2	2	2	2	2	2	2	2	2	2	2	2	2	2	2	2	2	2	2	2	2
AX-147208069	Aradu.A01	2110707	Aradu.A01	2110707	A01	53.451	A01_2110707_Sten	-	1	1	2	2	2	2	2	2	2	2	2	2	2	2	2	2	2	2	2	2	2	2	2	2	2	2	2	2	2	2	2	2	2	2	2	2	2	2	2	2	2
AX-147208101	Aradu.A01	2278223	Aradu.A01	2278223	A01	54.761	A01_2278223_Sten	-	1	1	2	2	2	2	2	2	2	2	2	2	2	2	2	2	2	2	2	2	2	2	2	2	2	2	2	2	2	2	2	2	2	2	2	2	2	2	2	2	2
AX-147208100	Aradu.A01	2272833	Aradu.A01	2272833	A01	55.532	A01_2272833_Sten	-	1	1	2	2	2	2	2	2	2	2	2	2	2	2	2	2	2	2	2	2	2	2	2	2	2	2	2	2	2	2	2	2	2	2	2	2	2	2	2	2	2
AX-147208105	Aradu.A01	2303999	Aradu.A01	2303999	A01	55.788	A01_2303999_Sten	-	1	1	2	2	2	2	2	2	2	2	2	2	2	2	2	2	2	2	2	2	2	2	2	2	2	2	2	2	2	2	2	2	2	2	2	2	2	2	2	2	2
AX-147208106	Aradu.A01	2304266	Aradu.A01	2304266	A01	56.981	A01_2304266_Sten	-	1	1	2	2	2	2	2	2	2	2	2	2	2	2	2	2	2	2	2	2	2	2	2	2	2	2	2	2	2	2	2	2	2	2	2	2	2	2	2	2	2
AX-147208130	Aradu.A01	2434150	Aradu.A01	2434150	A01	58.159	A01_2434150_Sten	-	1	1	2	2	2	2	2	2	2	2	2	2	2	2	2	2	2	2	2	2	2	2	2	2	2	2	2	2	2	2	2	2	2	2	2	2	2	2	2	2	2
AX-147208153	Aradu.A01	2784796	Aradu.A01	2784796	A01	60.386	A01_2784796_Sten	-	1	1	2	2	2	2	2	2	2	2	2	2	2	2	2	2	2	2	2	2	2	2	2	2	2	2	2	2	2	2	2	2	2	2	2	2	2	2	2	2	2
AX-147208184	Aradu.A01	2897855	Aradu.A01	2897855	A01	66.315	A01_2897855_Sten	-	1	1	2	2	2	2	2	2	2	2	2	2	2	2	2	2	2	2	2	2	2	2	2	2	2	2	2	2	2	2	2	2	2	2	2	2	2	2	2	2	2
AX-147208224	Aradu.A01	3069430	Aradu.A01	3069430	A01	68.775	A01_3069430_Sten	-	1	1	2	2	2	2	2	2	2	2	2	2	2	2	2	2	2	2	2	2	2	2	2	2	2	2	2	2	2	2	2	2	2	2	2	2	2	2	2	2	2
AX-147265734	Aradu.A01	3120188	Aradu.A01	3120188	A01	68.784	A01_3120188_Sten	-	1	1	2	2	2	2	2	2	2	2	2	2	2	2	2	2	2	2	2	2	2	2	2	2	2	2	2	2	2	2	2	2	2	2	2	2	2	2	2	2	2
AX-147208225	Aradu.A01	3071017	Aradu.A01	3071017	A01	69.449	A01_3071017_Sten	-	1	1	2	2	2	2	2	2	2	2	2	2	2	2	2	2	2	2	2	2	2	2	2	2	2	2	2	2	2	2	2	2	2	2	2	2	2	2	2	2	2
AX-147208245	Aradu.A01	3120434	Aradu.A01	3120434	A01	69.801	A01_3120434_Sten	-	1	1	2	2	2	2	2	2	2	2	2	2	2	2	2	2	2	2	2	2	2	2	2	2	2	2	2	2	2	2	2	2	2	2	2	2	2	2	2	2	2
AX-147208217	Aradu.A01	3034640	Aradu.A01	3034640	A01	70.684	A01_3034640_Sten	-	1	1	2	2	2	2	2	2	2	2	2	2	2	2	2	2	2	2	2	2	2	2	2	2	2	2	2	2	2	2	2	2	2	2	2	2	2	2	2	2	2
AX-147208252	Aradu.A01	3128533	Aradu.A01	3128533	A01	71.859	A01_3128533_Sten	-	1	1	2	2	2	2	2	2	2	2	2	2	2	2	2	2	2	2	2	2	2	2	2	2	2	2	2	2	2	2	2	2	2	2	2	2	2	2	2	2	2
AX-147208281	Aradu.A01	3173724	Aradu.A01	3173724	A01	72.227	A01_3173724_Sten	-	1	1	2	2	2	2	2	2	2	2	2	2	2	2	2	2	2	2	2	2	2	2	2	2	2	2	2	2	2	2	2	2	2	2	2	2	2	2	2	2	2
AX-147208277	Aradu.A01	3171803	Aradu.A01	3171803	A01	73.406	A01_3171803_Sten	-	1	1	2	2	2	2	2	2	2	2	2	2	2	2	2	2	2	2	2	2	2	2	2	2	2	2	2	2	2	2	2	2	2	2	2	2	2	2	2	2	2
AX-147208313	Aradu.A01	3335170	Aradu.A01	3335170	A01	74.438	A01_3335170_Sten	-	1	1	2	2	2	2	2	2	2	2	2	2	2	2	2	2	2	2	2	2	2	2	2	2	2	2	2	2	2	2	2	2	2	2	2	2	2	2	2	2	2
AX-147265753	Aradu.A01	3335472	Aradu.A01	3335472	A01	74.817	A01_3335472_Sten	-	1	1	2	2	2	2	2	2	2	2	2	2	2	2	2	2	2	2	2	2	2	2	2	2	2	2	2	2	2	2	2	2	2	2	2	2	2	2	2	2	2
AX-147265751	Aradu.A01	3331989	Aradu.A01	3331989	A01	75.464	A01_3331989_Sten	-	1	1	2	2	2	2	2	2	2	2	2	2	2	2	2	2	2	2	2	2	2	2	2	2	2	2	2	2	2	2	2	2	2	2	2	2	2	2	2	2	2
AX-147208320	Aradu.A01	3362317	Aradu.A01	3362317	A01	76.75	A01_3362317_Sten	-	1	1	2	2	2	2	2	2	2	2	2	2	2	2	2	2	2	2	2	2	2	2	2	2	2	2	2	2	2	2	2	2	2	2	2	2	2	2	2	2	2
AX-147208345	Aradu.A01	3438883	Aradu.A01	3438883	A01	77.789	A01_3438883_Sten	-	1	1	2	2	2	2	2	2	2	2	2	2	2	2	2	2	2	2	2	2	2	2	2	2	2	2	2	2	2	2	2	2	2	2	2	2	2	2	2	2	2
AX-147208366	Aradu.A01	3462248	Aradu.A01	3462248	A01	78.634	A01_3462248_Sten	-	1	1	2	2	2	2	2	2	2	2	2	2	2	2	2	2	2	2	2	2	2	2	2	2	2	2	2	2	2	2	2	2	2	2	2	2	2	2	2	2	2
AX-147208419	Aradu.A01	3648316	Aradu.A01	3648316	A01	80.332	A01_3648316_Sten	-	1	1	2	2	2	2	2	2	2	2	2	2	2	2	2	2	-	2	2	2	2	2	2	2	2	2	2	2	2	2	2	2	2	2	2	2	2	2	2	2	2
AX-147208459	Aradu.A01	3857470	Aradu.A01	3857470	A01	83.13	A01_3857470_Sten	-	1	1	2	2	2	2	2	2	2	2	2	2	2	2	2	2	2	2	2	2	2	2	2	2	2	2	2	2	2	2	2	2	2	2	2	2	2	2	2	2	2
AX-147208462	Aradu.A01	3864763	Aradu.A01	3864763	A01	84.352	A01_3864763_Sten	-	1	1	2	2	2	2	2	2	2	2	2	2	2	2	2	2	2	2	2	2	2	2	2	2	2	2	2	2	2	2	2	2	2	2	2	2	2	2	2	2	2
AX-147208456	Aradu.A01	3845309	Aradu.A01	3845309	A01	85.57	A01_3845309_Sten	-	1	1	2	2	2	2	2	2	2	2	2	2	2	2	2	2	2	2	2	2	2	2	2	2	2	2	2	2	2	2	2	2	2	2	2	2	2	2	2	2	2
AX-147208477	Aradu.A01	3947660	Aradu.A01	3947660	A01	86.627	A01_3947660_Sten	-	1	1	2	2	2	2	2	2	2	2	2	2	2	2	2	2	2	2	2	2	2	2	2	2	2	2	2	2	2	2	2	2	2	2	2	2	2	2	2	2	2
AX-147208481	Aradu.A01	3986510	Aradu.A01	3986510	A01	88.114	A01_3986510_Sten	-	1	1	2	2	2	2	2	2	2	2	2	2	2	2	2	2	2	2	2	2	2	2	2	2	2	2	2	2	2	2	2	2	2	2	2	2	2	2	2	2	2
AX-147208488	Aradu.A01	4017783	Aradu.A01	4017783	A01	90.374	A01_4017783_Sten	-	1	1	2	2	2	2	2	2	2	2	2	2	2	2	2	2	2	2	2	2	2	2	2	2	2	2	2	2	2	2	2	2	2	2	2	2	2	2	2	2	2
AX-147208523	Aradu.A01	4143724	Aradu.A01	4143724	A01	93.77	A01_4143724_Sten	-	1	1	2	2	2	2	2	2	2	2	2	2	2	2	2	2	2	2	2	2	2	2	2	2	2	2	2	2	2	2	2	2	2	2	2	2	2	2	2	2	2
AX-147208570	Aradu.A01	4472019	Aradu.A01	4472019	A01	100.025	A01_4472019_Sten	-	1	1	2	2	2	2	2	2	2	2	2	2	2	2	2	2	2	2	2	2	2	2	2	2	2	2	2	2	2	2	2	2	2	2	2	2	2	2	2	2	2
AX-147208614	Aradu.A01	4678382	Aradu.A01	4678382	A01	104.238	A01_4678382_Sten	-	1	1	2	2	2	2	2	2	2	2	2	2	2	2	2	2	2	2	2	2	2	2	2	2	2	2	2	2	2	2	2	2	2	2	2	2	2	2	2	2	2
AX-147208650	Aradu.A01	4901872	Aradu.A01	4901872	A01	105.71	A01_4901872_Sten	-	1	1	2	2	2	2	2	2	2	2	2	2	2	2	2	2	2	2	2	2	2	2	2	2	2	2	2	2	2	2	2	2	2	2	2	2	2	2	2	2	2
AX-147208681	Aradu.A01	4956444	Aradu.A01	4956444	A01	107.498	A01_4956444_Sten	-	1	1	2	2	2	2	2	2	2	2	2	2	2	2	2	2	2	2	2	2	2	2	2	2	2	2	2	2	2	2	2	2	2	2	2	2	2	2	2	2	2
AX-147208686	Aradu.A01	4971720	Aradu.A01	4971720	A01	108.026	A01_4971720_Sten	-	1	1	2	2	2	2	2	2	2	2	2	2	2	2	2	2	2	2	2	2	2	2	2	2	2	2	2	2	2	2	2	2	2	2	2	2	2	2	2	2	2
AX-147208687	Aradu.A01	4971756	Aradu.A01	4971756	A01	108.283	A01_4971756_Sten	-	1	1	2	2	2	2	2	2	2	2	2	2	2	2	2	2	2	2	2	2	2	2	2	2	2	2	2	2	2	2	2	2	2	2	2	2	2	2	2	2	2
AX-147208809	Aradu.A01	5589971	Aradu.A01	5589971	A01	111.755	A01_5589971_Sten	-	1	1	2	2	2	2	2	2	2	2	2	2	2	2	2	2	2	2	2	2	2	2	2	2	2	2	2	2	2	2	2	2	2	2	2	2	2	2	2	2	2
AX-147208902	Aradu.A01	6200658	Aradu.A01	6200658	A01	113.552	A01_6200658_Sten	-	1	1	2	2	2	2	2	2	2	2	2	2	2	2	2	2	2	2	2	2	2	2	2	2	2	2	2	2	2	2	2	2	2	2	2	2	2	2	2	2	2
AX-147208929	Aradu.A01	6337729	Aradu.A01	6337729	A01	117.46	A01_6337729_Sten	-	1	1	2	2	2	2	2	2	2	2	2	2	2	2	2	2	2	2	2	2	2	2	2	2	2	2	2	2	2	2	2	2	2	2	2	2	2	2	2	2	2
AX-147208981	Aradu.A01	6679326	Aradu.A01	6679326	A01	119.792	A01_6679326_Sten	-	1	1	2	2	2	2	2	2	2	2	2	2	2	2	2	2	2	2	2	2	2	2	2	2	2	2	2	2	2	2	2	2	2	2	2	2	2	2	2	2	2
AX-147208979	Aradu.A01	6679029	Aradu.A01	6679029	A01	120.068	A01_6679029_Sten	-	1	1	2	2	2	2	2	2	2	2	2	2	2	2	2	2	2	2	2	2	2	2	2	2	2	2	2	2	2	2	2	2	2	2	2	2	2	2	2	2	2
AX-147209005	Aradu.A01	6797615	Aradu.A01	6797615	A01	120.865	A01_6797615_Sten	-	1	1	2	2	2	2	2	2	2	2	2	2	2	2	2	2	2	2	2	2	2	2	2	2	2	2	2	2	2	2	2	2	2	2	2	2	2	2	2	2	2
AX-147209001	Aradu.A01	6794484	Aradu.A01	6794484	A01	122.645	A01_6794484_Sten	-	1	1	2	2	2	2	2	2	2	2	2	2	2	2	2	2	2	2	2	2	2	2	2	2	2	2	2	2	2	2	2	2	2	2	2	2	2	2	2	2	2
AX-147209007	Aradu.A01	6797918	Aradu.A01	6797918	A01	123.417	A01_6797918_Sten	-	1	1	2	2	2	2	2	-	2	2	2	2	2	2	2	2	2	2	2	2	2	2	2	2	2	2	2	2	2	2	2	2	2	2	2	2	2	2	2	2	2
AX-147209047	Aradu.A01	7002818	Aradu.A01	7002818	A01	125.237	A01_7002818_Sten	-	1	1	2	2	2	2	2	2	2	2	2	2	2	2	2	2	2	2	2	2	2	2	2	2	2	2	2	2	2	2	2	2	2	2	2	2	2	2	2	2	2
AX-147209077	Aradu.A01	7260675	Aradu.A01	7260675	A01	128.102	A01_7260675_Sten	-	1	1	2	2	2	2	2	2	2	2	2	2	2	2	2	2	2	2	2	2	2	2	2	2	2	2	2	2	2	2	2	2	2	2	2	2	2	2	2	2	2
AX-147209151	Aradu.A01	7778025	Aradu.A01	7778025	A01	131.826	A01_7778025_Sten	-	1	1	2	2	2	2	2	2	2	-	2	2	2	2	2	2	2	2	2	2	2	2	2	2	2	2	2	2	2	2	2	2	2	2	2	2	2	2	2	2	2
AX-147209175	Aradu.A01	7840794	Aradu.A01	7840794	A01	132.984	A01_7840794_Sten	-	1	1	2	2	2	2	2	2	2	2	2	2	2	2	2	2	2	2	2	2	2	2	2	2	2	2	2	2	2	2	2	2	2	2	2	2	2	2	2	2	2
AX-147209153	Aradu.A01	7778389	Aradu.A01	7778389	A01	133.627	A01_7778389_Sten	-	1	1	2	2	2	2	2	2	2	2	2	2	2	2	2	2	2	2	2	2	2	2	2	2	2	2	2	2	2	2	2	2	2	2	2	2	2	2	2	2	2
AX-147209197	Aradu.A01	8070919	Aradu.A01	8070919	A01	134.398	A01_8070919_Sten	-	1	1	2	2	2	2	2	2	2	2	2	2	2	2	2	2	2	2	2	2	2	2	2	2	2	2	2	2	2	2	2	2	2	2	2	2	2	2	2	2	2
AX-147211627	Aradu.A01	88100301	Aradu.A01	88100301	A01	135.17	A01_88100301_Sten	-	1	1	2	2	2	2	2	2	2	2	2	2	2	2	2	2	2	2	2	2	2	2	2	2	2	2	2	2	2	2	2	2	2	2	2	2	2	2	2	2	2
AX-147210038	Aradu.A01	11922479	Aradu.A01	11922479	A01	135.683	A01_11922479_Sten	-	1	1	2	2	2	2	2	2	2	2	2	2	2	2	2	2	2	2	2	2	2	2	2	2	2	2	2	2	2	2	2	2	2	2	2	2	2	2	2	2	2
AX-147210045	Aradu.A01	11971012	Aradu.A01	11971012	A01	135.94	A01_11971012_Sten	-	1	1	2	2	2	2	2	2	2	2	2	2	2	2	2	2	2	2	2	2	2	2	2	2	2	2	2	2	2	2	2	2	2	2	2	2	2	2	2	2	2
AX-147210055	Aradu.A01	12011768	Aradu.A01	12011768	A01	136.196	A01_12011768_Sten	-	1	1	2	2	2	2	2	2	2	2	2	2	2	2	2	2	2	2	2	2	2	2	2	2	2	2	2	2	2	2	2	2	2	2	2	2	2	2	2	2	2
AX-147209973	Aradu.A01	11617268	Aradu.A01	11617268	A01	136.709	A01_11617268_Sten	-	1	1	2	2	2	2	2	2	2	2	2	2	2	2	2	2	2	2	2	2	2	2	2	2	2	2	2	2	2	2	2	2	2	2	2	2	2	2	2	2	2
AX-147210007	Aradu.A01	11796164	Aradu.A01	11796164	A01	136.726	A01_11796164_Sten	-	1	1	2	2	2	2	2	2	2	2	2	2	2	2	2	2	2	2	2	2	2	2	2	2	2	2	2	2	-	2	2	2	2	2	2	2	2	2	2	2	2
AX-147237395	Araip.B01	209694	Aradu.A01	11812741	A01	137.222	A01_11812741_Sten	-	1	1	2	2	2	2	2	2	2	2	2	2	2	2	2	2	2	2	2	2	2	2	2	2	2	2	2	2	2	2	2	2	3	2	2	2	2	2	2	2	2
AX-147209963	Aradu.A01	11604414	Aradu.A01	11604414	A01	137.733	A01_11604414_Sten	-	1	1	2	2	2	2	2	2	2	2	2	2	2	2	2	2	2	2	2	2	2	2	2	2	2	2	2	2	2	2	2	2	2	2	2	2	2	2	2	2	2
AX-147209959	Aradu.A01	11416797	Aradu.A01	11416797	A01	138.508	A01_11416797_Sten	-	1	1	2	2	2	2	2	2	2	2	2	2	2	2	2	2	2	2	2	2	2	2	2	2	2	2	2	2	2	2	2	2	2	2	2	2	2	2	2	2	2
AX-147209957	Aradu.A01	11401844	Aradu.A01	11401844	A01	138.764	A01_11401844_Sten	-	1	1	2	2	2	2	2	2	2	2	2	2	2	2	2	2	2	2	2	2	2	2	2	2	2	2	2	2	2	2	2	2	2	2	2	2	2	2	2	2	2
AX-147209909	Aradu.A01	11117619	Aradu.A01	11117619	A01	140.471	A01_11117619_Sten	-	1	1	2	2	2	2	2	2	2	2	2	2	2	2	2	2	2	2	2	2	2	2	2	2	2	2	2	2	2	2	2	2	2	2	2	2	2	2	2	2	2
AX-147209871	Aradu.A01	10877830	Aradu.A01	10877830	A01	141.762	A01_10877830_Sten	-	1	1	2	2	2	2	2	2	2	2	2	2	2	2	2	2	2	2	2	2	2	2	2	2	2	2	2	2	2	2	2	2	2	2	2	2	2	2	2	2	2
AX-147209746	Aradu.A01	10363537	Aradu.A01	10363537	A01	143.099	A01_10363537_Sten	-	1	1	2	2	2	2	2	2	2	2	2	2	2	2	2	2	2	2	2	2	2	2	2	2	2	2	2	2	2	2	2	2	2	2	2	2	2	2	2	2	2
AX-147209744	Aradu.A01	10362840	Aradu.A01	10362840	A01	143.615	A01_10362840_Sten	-	1	1	2	2	2	2	2	2	2	2	2	2	2	2	2	2	2	2	2	2	2	2	2	2	2	2	2	2	2	2	2	2	2	2	2	2	2	2	2	2	2
AX-147209734	Aradu.A01	10355299	Aradu.A01	10355299	A01	144.154	A01_10355299_Sten	-	1	1	2	2	2	2	2	2	2	2	2	2	2	2	2	2	2	2	2	2	2	2	2	2	2	2	2	2	2	2	2	2	2	2	2	2	2	2	2	2	2
AX-147209631	Aradu.A01	10031655	Aradu.A01	10031655	A01	149.9	A01_10031655_Sten	-	1	1	2	2	2	2	2	2	2	2	2	2	2	2	2	2	2	2	2	2	2	2	2	2	2	2	2	2	2	2	2	2	2	2	2	2	2	2	2	2	2
AX-147209529	Aradu.A01	9601661	Aradu.A01	9601661	A01	150.555	A01_9601661_Sten	-	1	1	2	2	2	2	2	2	2	2	2	2	2	2	2	2	2	2	2	2	2	2	2	2	2	2	2	2	2	2	2	2	2	2	2	2	2	2	2	2	2
AX-147209562	Aradu.A01	9683595	Aradu.A01	9683595	A01	154.052	A01_9683595_Sten	-	1	1	2	2	2	2	2	2	2	2	2	2	2	2	2	2	2	2	2	2	2	2	2	2	2	2	2	2	2	2	2	2	2	2	2	2	2	2	2	2	2
AX-147209535	Aradu.A01	9616542	Aradu.A01	9616542	A01	160.782	A01_9616542_Sten	-	1	1	2	2	2	2	2	2	2	2	2	2	2	2	2	2	2	2	2	2	2	2	2	2	2	2	2	2	2	2	2	2	2	2	2	2	2	2	2	2	2
AX-147210087	Aradu.A01	12274662	Aradu.A01	12274662	A01	173.09	A01_12274662_Sten	-	1	1	2	2	2	2	2	2	2	2	2	2	2	2	2	2	2	2	2	2	2	2	2	2	2	2	2	2	2	2	2	2	2	2	2	2	2	2	2	2	2
AX-147210198	Aradu.A01	14652715	Aradu.A01	14652715	A01	179.73	A01_14652715_Sten	-	1	1	2	2	2	2	2	2	2	2	2	2	2	2	2	2	2	2	2	2	2	2	2	2	2	2	2	2	2	2	2	2	2	2	2	2	2	2	2	2	2
AX-147210224	Aradu.A01	15260506	Aradu.A01	15260506	A01	181.019	A01_15260506_Sten	-	1	1	2	2	2	2	2	2	2	2	2	2	2	2	2	2	2	2	2	2	2	2	2	2	2	2	2	2	2	2	2	2	2	2	2	2	2	2	2	2	2
AX-147210210	Aradu.A01	14895529	Aradu.A01	14895529	A01	182.77	A01_14895529_Sten	-	1	1	2	2	2	2	2	-	2	2	2	2	2	2	2	2	2	2	2	2	2	2	2	2	2	2	2	2	2	2	2	2	2	2	2	2	2	2	2	2	2
AX-147210114	Aradu.A01	12593839	Aradu.A01	12593839	A01	183.62	A01_12593839_Sten	-	1	1	2	2	2	2	2	2	2	2	2	2	2	2	2	2	2	2	2	2	2	2	2	2	2	2	2	2	2	2	2	2	2	2	2	2	2	2	2	2	2
AX-147210119	Aradu.A01	12610918	Aradu.A01	12610918	A01	183.62	A01_12610918_Sten	-	1	1	2	2	2	2	2	2	2	2	2	2	2	2	2	2	2	2	2	2	2	2	2	2	2	2	2	2	2	2	2	2	2	2	2	2	2	2	2	2	2
AX-147210422	Aradu.A01	20832856	Aradu.A01	20832856	A01	186.971	A01_20832856_Sten	-	1	1	2	2	2	2	2	2	2	2	2	2	2	2	2	2	2	2	2	2	2	2	2	2	2	2	2	2	2	2	2	2	2	2	2	2	2	2	2	2	2
AX-147210432	Aradu.A01	21307983	Aradu.A01	21307983	A01	188.266	A01_21307983_Sten	-	1	1	2	2	2	2	2	2	2	2	2	2	2	2	2	2	2	2	2	2	2	2	2	2	2	2	2	2	2	2	2	2	2	2	2	2	2	2	2	2	2
AX-147210581	Aradu.A01	27742158	Aradu.A01	27742158	A01	190.072	A01_27742158_Sten	-	1	1	2	2	2	2	2	2	2	2	2	2	2	2	2	2	2	2	2	2	2	2	2	2	2	2	2	2	2	2	2	2	2	2	2	2	2	2	2	2	2
AX-147210510	Aradu.A01	23821551	Aradu.A01	23821551	A01	190.969	A01_23821551_Sten	-	1	1	2	2	2	2	2	2	2	2	2	2	2	2	2	2	2	2	2	2	2	2	2	2	2	2	2	2	2	2	2	2	2	2	2	2	2	2	2	2	2
AX-147210595	Aradu.A01	28149031	Aradu.A01	28149031	A01	192.529	A01_28149031_Sten	-	1	1	2	2	2	2	2	2	2	-	2	2	2	2	2	2	2	2	2	2	2	2	2	2	2	2	2	2	2	2	2	2	2	2	2	2	2	2	2	2	2
AX-147210648	Aradu.A01	29419297	Aradu.A01	29419297	A01	193.158	A01_29419297_Sten	-	1	1	2	2	2	2	2	2	2	2	2	2	2	2	2	2	2	2	2	2	2	2	2	2	2	2	2	2	2	2	2	2	2	2	2	2	2	2	2	2	2
AX-147210754	Aradu.A01	32558513	Aradu.A01	32558513	A01	193.669	A01_32558513_Sten	-	1	1	2	2	2	2	2	2	2	2	2	2	2	2	2	2	2	2	2	2	2	2	2	2	2	2	2	2	2	2	2	2	2	2	2	2	2	2	2	2	2
AX-147210685	Aradu.A01	30700040	Aradu.A01	30700040	A01	194.44	A01_30700040_Sten	-	1	1	2	2	2	2	2	2	2	2	2	2	2	2	2	2	2	2	2	2	2	2	2	2	2	2	2	2	2	2	2	2	2	2	2	2	2	2	2	2	2
AX-147211069	Aradu.A01	44307659	Aradu.A01	44307659	A01	198.067	A01_44307659_Sten	-	1	1	2	2	2	2	2	2	2	2	2	2	2	2	2	2	2	2	2	2	2	2	2	2	2	2	2	2	2	2	2	2	2	2	2	2	2	2	2	2	2
AX-147211197	Aradu.A01	50292886	Aradu.A01	50292886	A01	203.189	A01_50292886_Sten	-	1	1	2	2	2	2	2	2	2	2	3	2	2	2	2	2	2	2	2	2	2	2	2	2	2	2	2	2	2	2	2	2	2	2	2	2	2	2	2	2	2
AX-147211190	Aradu.A01	50181195	Aradu.A01	50181195	A01	204.966	A01_50181195_Sten	-	1	1	2	2	2	2	2	2	2	2	2	2	2	2	2	2	2	2	2	2	2	2	2	2	2	2	2	2	2	2	2	2	2	2	2	2	2	2	2	2	2
AX-147211192	Aradu.A01	50259692	Aradu.A01	50259692	A01	205.354	A01_50259692_Sten	-	1	1	2	2	2	2	2	2	2	2	2	2	2	2	2	2	2	2	2	2	2	2	2	2	2	2	2	2	2	2	2	2	2	2	2	2	2	2	2	2	2
AX-147211171	Aradu.A01	49885303	Aradu.A01	49885303	A01	205.355	A01_49885303_Sten	-	1	1	2	2	2	2	2	2	2	2	2	2	2	2	2	2	2	2	2	2	2	2	2	2	2	2	2	2	2	2	2	2	2	2	2	2	2	2	2	2	2
AX-147211616	Aradu.A01	85136940	Aradu.A01	85136940	A01	207.156	A01_85136940_Sten	-	1	1	2	2	2	2	2	2	2	2	2	2	2	2	2	2	2	2	2	2	2	2	2	2	2	2	2	2	2	2	2	2	2	2	2	2	2	2	2	2	2
AX-147211516	Aradu.A01	70251849	Aradu.A01	70251849	A01	207.431	A01_70251849_Sten	-	1	1	2	2	2	2	2	2	2	2	2	2	2	2	2	2	2	2	2	2	2	2	2	2	2	2	2	2	2	2	2	2	2	2	2	2	2	2	2	2	2
AX-147211655	Aradu.A01	89685851	Aradu.A01	89685851	A01	210.871	A01_89685851_Sten	-	1	1	2	2	2	2	2	2	2	2	2	2	2	2	2	2	2	2	2	2	2	2	2	2	2	2	2	2	2	2	2	2	2	2	2	2	2	2	2	2	2
AX-147211670	Aradu.A01	90405872	Aradu.A01	90405872	A01	212.536	A01_90405872_Sten	-	1	1	2	2	2	2	2	2	2	2	2	2	2	2	2	2	2	2	2	2	2	2	2	2	2	2	2	2	2	2	2	2	2	2	2	2	2	2	2	2	2
AX-147211714	Aradu.A01	92478990	Aradu.A01	92478990	A01	219.537	A01_92478990_Sten	-	1	1	2	2	2	2	2	-	2	2	2	2	2	2	2	2	2	2	2	2	2	2	2	2	2	2	2	2	2	2	2	2	2	2	2	2	2	2	2	2	2
AX-147211718	Aradu.A01	92596134	Aradu.A01	92596134	A01	220.619	A01_92596134_Sten	-	1	1	2	2	2	2	2	2	2	2	2	2	2	2	2	2	2	2	2	2	2	2	2	2	2	2	2	2	2	2	2	2	2	-	2	2	2	2	2	2	2
AX-147211790	Aradu.A01	94844203	Aradu.A01	94844203	A01	232.525	A01_94844203_Sten	-	1	1	2	2	2	2	2	2	2	2	2	2	2	2	3	2	2	2	2	2	2	2	2	2	2	2	2	2	2	2	2	2	2	2	2	2	2	2	2	2	2
AX-147211814	Aradu.A01	95704657	Aradu.A01	95704657	A01	234.266	A01_95704657_Sten	-	1	1	2	2	2	2	2	2	2	2	2	2	2	2	2	2	2	2	2	2	2	2	2	2	2	2	2	2	2	2	2	2	2	2	2	2	2	2	2	2	2
AX-147211860	Aradu.A01	97205940	Aradu.A01	97205940	A01	240.037	A01_97205940_Sten	-	1	1	2	2	2	2	2	2	2	2	2	2	2	2	2	2	2	2	2	2	2	2	2	2	2	2	2	2	2	2	2	2	2	2	2	2	2	2	2	2	2
AX-147211886	Aradu.A01	98852433	Aradu.A01	98852433	A01	245.244	A01_98852433_Sten	-	1	1	2	2	2	2	2	2	2	2	2	2	2	2	2	2	2	2	2	2	2	2	2	2	2	2	2	2	2	2	3	2	2	2	2	2	3	2	2	2	3
AX-147211900	Aradu.A01	99546596	Aradu.A01	99546596	A01	249.469	A01_99546596_Sten	-	1	1	2	2	2	2	2	2	2	2	2	2	2	2	2	2	2	2	2	2	2	2	2	2	2	2	2	2	2	2	1	2	2	2	2	2	1	2	2	2	1
AX-147211932	Aradu.A01	100479409	Aradu.A01	100479409	A01	257.732	A01_100479409_Sten	-	1	1	2	2	2	2	2	2	2	2	2	2	2	2	2	2	2	2	2	2	2	2	2	2	2	2	2	2	2	2	1	2	2	2	2	2	1	2	2	2	1
AX-147211929	Aradu.A01	100451974	Aradu.A01	100451974	A01	257.733	A01_100451974_Sten	-	1	1	2	2	2	2	2	2	2	2	2	2	2	2	2	2	2	2	2	2	2	2	2	2	2	2	2	2	2	2	1	2	2	2	2	2	1	2	2	2	1
AX-147211962	Aradu.A01	101270428	Aradu.A01	101270428	A01	260.18	A01_101270428_Sten	-	1	1	2	2	2	2	2	2	2	2	2	2	2	2	2	2	2	2	2	2	2	2	2	2	2	2	2	2	2	2	3	2	2	2	2	2	3	2	2	2	3
AX-147211986	Aradu.A01	102053529	Aradu.A01	102053529	A01	266.331	A01_102053529_Sten	-	1	1	2	2	2	2	2	2	2	2	2	2	2	2	2	2	2	2	2	2	2	2	2	2	2	2	2	2	2	2	1	2	2	2	2	2	1	2	2	2	1
AX-147211994	Aradu.A01	102165459	Aradu.A01	102165459	A01	268.551	A01_102165459_Sten	-	1	1	2	2	2	2	2	2	2	2	2	2	2	2	2	2	2	2	2	2	2	2	2	2	2	2	2	2	2	2	3	2	2	2	2	2	3	2	2	2	3
AX-147238925	Araip.B01	121643934	Aradu.A01	103677735	A01	280.136	A01_103677735_Sten	-	1	1	2	2	2	2	2	2	2	2	2	2	2	2	2	2	2	2	2	-	2	2	2	2	2	2	2	2	2	2	3	2	2	2	2	2	3	2	2	2	3
AX-147212041	Aradu.A01	104077042	Aradu.A01	104077042	A01	281.979	A01_104077042_Sten	-	1	1	2	2	2	2	2	2	2	2	2	2	2	2	2	2	2	2	2	2	2	2	2	2	2	2	2	2	2	2	1	2	2	2	2	2	1	2	2	2	1
AX-147212065	Aradu.A01	105355893	Aradu.A01	105355893	A01	284.817	A01_105355893_Sten	-	1	1	2	2	2	2	2	2	2	2	2	2	2	2	2	2	2	2	2	2	2	2	2	2	2	2	2	2	2	2	3	2	2	2	2	2	3	2	2	2	3
AX-147212094	Aradu.A01	106856793	Aradu.A01	106856793	A01	290.558	A01_106856793_Sten	-	1	1	2	2	2	2	2	2	2	2	2	2	2	2	2	2	2	2	2	2	2	2	2	2	2	2	2	2	2	2	3	2	2	2	2	2	3	2	2	2	2
AX-147212253	Aradu.A02	665048	Aradu.A02	665048	A02	17.219	A02_665048_Sten	-	1	1	2	2	2	2	2	2	2	2	2	2	2	2	2	2	2	2	2	2	2	2	2	2	2	2	2	2	2	2	2	2	2	2	2	2	2	2	2	2	2
AX-147212220	Aradu.A02	529301	Aradu.A02	529301	A02	19.409	A02_529301_Sten	-	1	1	2	2	2	2	2	2	2	2	2	2	2	2	2	2	2	2	2	2	2	2	2	2	2	2	2	2	2	2	2	2	2	2	2	2	2	2	2	2	2
AX-147212320	Aradu.A02	805196	Aradu.A02	805196	A02	37.709	A02_805196_Sten	-	1	1	2	2	2	2	2	2	2	2	2	2	2	2	2	2	2	2	2	2	2	2	2	2	2	2	2	2	2	2	2	2	2	2	2	2	2	2	2	2	2
AX-147212305	Aradu.A02	770726	Aradu.A02	770726	A02	38.107	A02_770726_Sten	-	1	1	2	2	2	2	2	2	2	2	2	2	2	2	2	2	2	2	2	2	2	2	2	2	2	2	2	2	2	2	2	2	2	2	2	2	2	2	2	2	2
AX-147212409	Aradu.A02	1180998	Aradu.A02	1180998	A02	49.645	A02_1180998_Sten	-	1	1	2	2	2	2	2	2	2	2	2	2	2	2	2	2	2	2	2	2	2	2	2	2	2	2	2	2	2	2	2	2	2	2	2	2	2	2	2	2	2
AX-147212511	Aradu.A02	1556477	Aradu.A02	1556477	A02	72.565	A02_1556477_Sten	-	1	1	2	2	2	2	2	2	2	2	2	2	2	2	2	2	2	2	2	2	2	2	2	2	2	2	2	2	2	2	2	2	2	2	2	2	2	2	2	2	2
AX-147212463	Aradu.A02	1333411	Aradu.A02	1333411	A02	77.268	A02_1333411_Sten	-	1	1	2	2	2	2	2	2	2	2	2	2	2	2	2	2	2	2	2	2	2	2	2	2	2	2	2	2	2	2	2	2	2	2	2	2	2	2	2	2	2
AX-147240118	Araip.B02	1813055	Aradu.A02	2483118	A02	86.226	A02_2483118_Sten	-	1	1	2	2	2	2	-	2	2	2	2	2	2	2	2	2	2	2	2	2	2	2	2	2	2	2	2	2	2	2	2	2	2	2	2	2	2	2	2	2	2
AX-147212778	Aradu.A02	3001420	Aradu.A02	3001420	A02	100.153	A02_3001420_Sten	-	1	1	2	2	2	2	2	2	2	2	2	2	2	2	2	2	2	2	2	2	2	2	2	2	2	2	2	2	2	2	2	2	2	2	2	2	2	2	2	2	2
AX-147212672	Aradu.A02	2595255	Aradu.A02	2595255	A02	109.905	A02_2595255_Sten	-	1	1	2	2	2	2	2	2	2	2	2	2	2	2	2	2	2	2	2	2	2	2	2	2	2	2	2	2	2	2	2	2	2	2	2	2	2	2	2	2	2
AX-147212669	Aradu.A02	2594478	Aradu.A02	2594478	A02	110.889	A02_2594478_Sten	-	1	1	2	2	2	2	2	2	2	2	2	2	2	2	2	2	2	2	2	2	2	2	2	2	2	2	2	2	2	2	2	2	2	2	2	2	2	2	2	2	2
AX-147212687	Aradu.A02	2640814	Aradu.A02	2640814	A02	112.795	A02_2640814_Sten	-	1	1	2	2	2	2	2	2	2	2	2	2	2	2	2	2	2	2	2	2	2	2	2	2	2	2	2	2	2	2	2	2	2	2	2	2	2	2	2	2	2
AX-147212743	Aradu.A02	2844132	Aradu.A02	2844132	A02	116.814	A02_2844132_Sten	-	1	1	2	2	2	2	2	2	2	2	2	2	2	2	2	2	2	2	2	2	2	2	2	2	2	2	2	2	2	2	2	2	2	2	2	2	2	2	2	2	2
AX-147240219	Araip.B02	2133967	Aradu.A02	2825603	A02	133.047	A02_2825603_Sten	-	1	1	2	2	2	2	2	2	2	2	2	2	-	2	2	2	3	2	2	2	2	2	2	2	-	2	2	2	2	2	2	2	2	2	2	2	2	2	2	2	2
AX-147212689	Aradu.A02	2641024	Aradu.A02	2641024	A02	136.362	A02_2641024_Sten	-	1	1	2	2	2	2	2	2	2	2	2	2	2	2	2	2	2	2	2	2	2	2	2	2	2	2	2	2	2	2	2	2	2	-	2	2	2	2	2	2	2
AX-147240131	Araip.B02	1826725	Aradu.A02	2497261	A02	139.524	A02_2497261_Sten	-	1	1	2	2	2	2	2	2	2	2	2	2	2	2	2	2	2	2	2	2	2	2	2	2	2	2	2	2	2	2	2	2	2	2	2	2	2	2	2	2	2
AX-147240530	Araip.B02	6057043	Aradu.A02	4723541	A02	153.738	A02_4723541_Sten	-	1	1	2	2	2	2	2	2	2	2	2	2	2	2	2	2	2	2	2	2	2	2	2	2	2	2	2	2	2	2	2	2	2	2	2	2	2	2	2	2	2
AX-147240478	Araip.B02	5027996	Aradu.A02	3939070	A02	159.441	A02_3939070_Sten	-	1	1	2	2	2	2	2	2	2	2	2	2	2	2	2	2	2	2	2	2	2	2	2	2	2	2	2	2	2	2	2	2	2	2	2	2	2	2	2	2	2
AX-147212952	Aradu.A02	4883639	Aradu.A02	4883639	A02	164.431	A02_4883639_Sten	-	1	1	2	2	2	2	2	2	2	2	2	2	2	2	2	2	2	2	2	2	2	2	2	2	2	2	2	2	2	2	2	2	2	2	2	2	2	2	2	2	2
AX-147212940	Aradu.A02	4851345	Aradu.A02	4851345	A02	166.173	A02_4851345_Sten	-	1	1	2	2	2	2	2	2	2	2	2	2	2	2	2	2	2	2	2	2	2	2	2	2	2	2	2	2	2	2	2	2	2	2	2	2	2	2	2	2	2
AX-147240547	Araip.B02	6141673	Aradu.A02	4869257	A02	168.117	A02_4869257_Sten	-	1	1	2	2	2	2	2	2	2	2	2	2	2	2	2	2	2	2	2	2	2	2	2	2	2	2	-	2	2	2	2	2	2	2	2	2	2	2	2	2	2
AX-147212981	Aradu.A02	5238703	Aradu.A02	5238703	A02	170.318	A02_5238703_Sten	-	1	1	2	2	2	2	2	2	2	2	2	2	2	2	2	2	2	2	2	2	2	2	2	2	2	2	2	2	2	2	2	2	2	2	2	2	2	2	2	2	2
AX-147212990	Aradu.A02	5270226	Aradu.A02	5270226	A02	171.303	A02_5270226_Sten	-	1	1	2	2	2	2	2	2	2	2	2	2	2	2	2	2	2	2	2	2	2	2	2	2	2	2	2	2	2	2	2	2	2	2	2	2	2	2	2	2	2
AX-147212998	Aradu.A02	5454619	Aradu.A02	5454619	A02	174.624	A02_5454619_Sten	-	1	1	2	2	2	2	2	-	2	2	2	2	2	2	2	2	2	2	2	2	2	2	2	2	2	2	2	2	2	2	2	2	2	-	2	2	2	2	2	2	2
AX-147257682	Araip.B08	11988412	Aradu.A02	5782865	A02	180.148	A02_5782865_Sten	-	1	1	2	2	2	2	2	2	2	2	2	2	2	2	2	2	2	2	2	2	2	2	2	2	2	2	2	2	2	2	2	2	2	2	2	2	2	2	2	2	2
AX-147213119	Aradu.A02	6341150	Aradu.A02	6341150	A02	185.044	A02_6341150_Sten	-	1	1	2	2	2	2	2	2	2	2	2	2	2	2	2	2	2	2	2	2	2	2	2	2	2	2	2	2	2	2	2	2	2	2	2	2	2	2	2	2	2
AX-147213146	Aradu.A02	6593512	Aradu.A02	6593512	A02	188.225	A02_6593512_Sten	-	1	1	2	2	2	2	2	2	2	2	2	2	2	2	2	2	2	2	2	2	2	2	2	2	-	2	2	2	2	2	2	2	2	2	2	2	2	2	2	2	2
AX-147213230	Aradu.A02	8195496	Aradu.A02	8195496	A02	190.913	A02_8195496_Sten	-	1	1	2	2	2	2	2	2	2	2	2	2	2	2	2	2	2	2	2	2	2	2	2	2	2	2	2	2	2	2	2	2	2	-	2	2	2	2	2	2	2
AX-147213317	Aradu.A02	9782639	Aradu.A02	9782639	A02	210.729	A02_9782639_Sten	-	1	1	2	2	2	2	2	2	2	2	2	2	2	2	2	2	2	2	2	2	2	2	2	2	2	2	2	2	2	2	2	2	2	2	2	2	2	2	2	2	2
AX-147213328	Aradu.A02	10054069	Aradu.A02	10054069	A02	211.386	A02_10054069_Sten	-	1	1	2	2	2	2	2	2	2	2	2	2	2	2	2	2	2	2	2	2	2	2	2	2	2	2	2	2	2	2	2	2	2	2	3	2	2	2	2	2	2
AX-147213355	Aradu.A02	10711674	Aradu.A02	10711674	A02	211.663	A02_10711674_Sten	-	1	1	2	2	2	2	2	2	2	2	2	2	2	2	2	2	2	2	2	2	2	2	2	2	2	2	2	2	2	2	2	2	2	2	2	2	2	2	2	2	2
AX-147213533	Aradu.A02	18984854	Aradu.A02	18984854	A02	218.467	A02_18984854_Sten	-	1	1	2	2	2	2	2	2	2	2	2	2	2	2	2	2	2	2	2	2	2	2	2	2	2	2	2	2	2	2	2	2	2	2	2	2	2	2	2	2	2
AX-147213689	Aradu.A02	39267704	Aradu.A02	39267704	A02	220.325	A02_39267704_Sten	-	1	1	2	2	2	2	2	2	2	2	2	2	2	2	2	2	2	2	2	2	2	2	2	2	2	2	2	2	2	2	2	2	2	2	2	2	2	2	2	2	2
AX-147213736	Aradu.A02	43374948	Aradu.A02	43374948	A02	220.944	A02_43374948_Sten	-	1	1	2	2	2	2	2	2	2	2	2	2	2	2	2	2	2	2	2	2	2	2	2	2	2	2	2	2	2	2	2	2	2	2	2	2	2	2	2	2	2
AX-147213789	Aradu.A02	52237448	Aradu.A02	52237448	A02	222.062	A02_52237448_Sten	-	1	1	2	2	2	2	2	2	2	2	2	2	2	2	2	2	2	2	2	2	2	2	2	2	2	2	2	2	2	2	2	2	2	2	2	2	2	2	2	2	2
AX-147213604	Aradu.A02	25951674	Aradu.A02	25951674	A02	224.627	A02_25951674_Sten	-	1	1	2	2	2	2	2	2	2	2	2	2	2	2	2	2	2	2	2	2	2	2	2	2	2	2	2	2	2	2	2	2	2	2	2	2	2	2	2	2	2
AX-147213756	Aradu.A02	47309222	Aradu.A02	47309222	A02	226.608	A02_47309222_Sten	-	1	1	2	2	2	2	2	2	2	2	2	2	2	2	2	2	2	2	2	2	2	2	2	2	2	2	2	2	2	2	2	2	2	2	2	2	2	2	2	2	2
AX-147213719	Aradu.A02	42029329	Aradu.A02	42029329	A02	230.834	A02_42029329_Sten	-	1	1	2	2	2	-	2	-	2	2	2	2	2	2	2	2	-	2	2	2	2	2	2	2	2	2	2	2	2	2	2	2	-	2	2	2	2	2	2	2	2
AX-147213617	Aradu.A02	28328466	Aradu.A02	28328466	A02	232.09	A02_28328466_Sten	-	1	1	2	2	2	2	2	-	2	2	2	2	2	2	2	2	2	2	2	2	2	2	2	2	2	2	2	2	2	2	2	2	2	2	2	2	2	2	2	2	2
AX-147213949	Aradu.A02	64315367	Aradu.A02	64315367	A02	234.149	A02_64315367_Sten	-	1	1	2	2	2	2	2	2	2	2	2	2	2	2	2	2	2	2	2	2	2	2	2	2	2	2	2	2	2	2	2	2	2	2	2	2	2	2	2	2	2
AX-147213981	Aradu.A02	66368426	Aradu.A02	66368426	A02	236.468	A02_66368426_Sten	-	1	1	2	2	2	2	2	2	2	2	2	2	2	2	2	2	2	2	2	2	2	2	2	2	2	2	2	2	2	2	2	2	2	2	2	2	2	2	2	2	2
AX-147214234	Aradu.A02	78187923	Aradu.A02	78187923	A02	240.719	A02_78187923_Sten	-	1	1	2	2	2	2	2	2	2	2	2	2	2	2	2	2	2	2	2	2	2	2	2	2	2	2	2	2	2	2	2	2	2	2	2	2	2	2	2	2	2
AX-147214185	Aradu.A02	75731986	Aradu.A02	75731986	A02	242.253	A02_75731986_Sten	-	1	1	2	2	2	2	2	2	2	2	2	2	2	2	2	2	2	2	2	2	2	2	2	2	2	2	2	2	2	2	2	2	2	3	2	2	2	2	2	2	2
AX-147213615	Aradu.A02	28157230	Aradu.A02	28157230	A02	244.599	A02_28157230_Sten	-	1	1	2	2	2	2	2	2	2	2	2	2	2	2	2	2	2	2	2	2	2	2	2	2	2	2	2	2	2	2	2	2	2	2	2	2	2	2	2	2	2
AX-147213651	Aradu.A02	30987480	Aradu.A02	30987480	A02	246.21	A02_30987480_Sten	Designed, ordered & Used (TableS2)	1	1	2	2	2	2	2	2	-	2	2	2	2	2	2	2	2	2	2	2	2	2	2	2	2	2	2	2	2	2	2	2	2	2	2	2	2	2	2	2	2
AX-147214462	Aradu.A02	81019015	Aradu.A02	81019015	A02	262.097	A02_81019015_Sten	Designed, ordered & Used (TableS2)	1	1	2	2	2	2	2	2	2	2	2	2	2	2	2	2	2	2	2	2	2	2	2	2	2	2	2	2	2	2	2	2	2	2	2	2	2	2	3	2	2
AX-147214548	Aradu.A02	81783405	Aradu.A02	81783405	A02	274.856	A02_81783405_Sten	-	1	1	2	2	2	2	2	2	2	2	2	2	2	2	2	2	2	2	2	2	2	2	2	2	2	2	2	2	2	2	2	2	2	2	2	2	2	2	1	2	2
AX-147242084	Araip.B02	94804237	Aradu.A02	82726560	A02	281.993	A02_82726560_Sten	-	1	1	2	2	2	2	2	2	2	2	2	2	2	2	2	2	2	2	2	2	2	2	2	2	3	2	2	2	2	2	2	2	2	2	2	2	2	2	3	2	2
AX-147214665	Aradu.A02	83464195	Aradu.A02	83464195	A02	283.626	A02_83464195_Sten	Designed, ordered & Used (TableS2)	1	1	2	2	2	2	2	2	2	2	2	2	2	2	2	2	2	2	2	2	2	2	2	2	2	2	2	2	2	2	2	2	2	2	2	2	2	2	3	2	2
AX-147242202	Araip.B02	97149692	Aradu.A02	84827045	A02	296.489	A02_84827045_Sten	-	1	1	2	2	2	2	2	2	2	2	2	2	2	2	2	2	2	2	2	2	2	2	2	2	2	2	2	2	2	2	2	2	2	2	2	2	2	2	3	2	2
AX-147214809	Aradu.A02	85315365	Aradu.A02	85315365	A02	299.133	A02_85315365_Sten	Designed, ordered & Used (TableS2)	1	1	2	2	2	2	2	2	2	2	2	2	2	2	2	2	2	2	2	2	2	2	2	2	2	2	2	2	2	2	2	2	2	2	2	2	2	2	3	2	2
AX-147214863	Aradu.A02	86385009	Aradu.A02	86385009	A02	308.833	A02_86385009_Sten	-	1	1	2	2	2	2	2	2	2	2	2	2	2	2	2	2	2	2	2	2	2	2	2	2	2	2	2	2	2	2	2	2	2	2	2	2	2	2	3	2	2
AX-147214925	Aradu.A02	87417752	Aradu.A02	87417752	A02	314.2	A02_87417752_Sten	-	1	1	2	2	2	2	2	2	2	2	2	2	2	2	2	2	2	2	2	2	2	2	-	2	2	2	2	2	2	2	2	2	2	2	2	2	2	2	1	2	2
AX-147215014	Aradu.A02	89159922	Aradu.A02	89159922	A02	320.655	A02_89159922_Sten	-	1	1	2	2	2	2	2	2	2	2	2	2	2	2	2	2	2	2	2	2	2	2	2	2	2	2	2	2	2	2	2	2	2	2	2	2	2	2	3	2	2
AX-147215181	Aradu.A02	91638679	Aradu.A02	91638679	A02	334.133	A02_91638679_Sten	-	1	1	2	2	2	2	2	2	2	2	2	2	2	2	2	2	2	2	2	2	2	2	2	2	2	-	3	2	2	2	2	2	3	3	2	2	2	2	3	2	2
AX-147215210	Aradu.A02	92077207	Aradu.A02	92077207	A02	340.147	A02_92077207_Sten	Designed, ordered & Used (TableS2)	1	1	2	2	2	2	2	2	2	2	2	2	2	2	2	2	2	2	2	2	2	2	2	2	3	2	3	-	2	2	2	2	3	2	2	2	2	2	3	2	2
AX-147242820	Araip.B02	107299069	Aradu.A02	92612299	A02	344.976	A02_92612299_Sten	-	1	1	2	2	2	2	2	2	2	2	2	2	2	2	2	2	2	2	2	2	2	2	2	2	3	2	3	2	2	2	2	2	3	2	2	2	2	2	3	2	2
AX-147215232	Aradu.A02	92983792	Aradu.A02	92983792	A02	349.851	A02_92983792_Sten	Designed, ordered & Used (TableS2)	1	1	2	2	2	2	2	2	2	2	2	2	2	2	2	2	2	2	2	2	2	2	2	2	3	2	3	2	2	2	2	2	3	2	2	2	2	2	3	2	2
AX-147215287	Aradu.A03	263799	Aradu.A03	263799	A03	1.144	A03_263799_Sten	-	1	1	2	2	2	2	2	2	2	2	2	2	2	2	2	2	2	2	2	2	2	2	2	2	2	2	2	2	2	2	2	2	2	2	2	3	2	2	2	2	3
AX-147215321	Aradu.A03	679404	Aradu.A03	679404	A03	4.411	A03_679404_Sten	-	1	1	2	2	2	2	2	2	2	2	2	2	2	2	2	2	2	2	2	2	2	2	2	2	2	2	2	2	2	2	2	2	2	2	2	3	2	2	2	2	3
AX-147215370	Aradu.A03	1447627	Aradu.A03	1447627	A03	15.492	A03_1447627_Sten	-	1	1	2	2	2	2	2	2	2	2	2	2	2	2	2	2	2	2	2	2	2	2	2	2	2	2	2	2	2	2	2	2	2	2	2	2	2	2	2	2	2
AX-147215426	Aradu.A03	1989523	Aradu.A03	1989523	A03	21.587	A03_1989523_Sten	-	1	1	2	2	2	2	2	2	2	2	2	2	2	2	2	2	2	2	2	2	2	2	2	2	2	2	2	2	2	2	2	2	2	2	2	2	2	2	2	2	2
AX-147215435	Aradu.A03	2018420	Aradu.A03	2018420	A03	27.353	A03_2018420_Sten	-	1	1	2	2	2	2	2	2	2	2	2	2	2	2	2	2	2	2	2	2	2	2	2	2	2	2	2	2	2	2	2	2	2	2	2	2	2	2	2	2	2
AX-147215412	Aradu.A03	1816539	Aradu.A03	1816539	A03	30.222	A03_1816539_Sten	-	1	1	2	2	2	2	2	2	2	2	2	2	2	2	2	2	2	2	2	2	2	2	2	2	2	2	2	2	2	2	2	2	2	2	2	2	2	2	2	2	2
AX-147215455	Aradu.A03	2327702	Aradu.A03	2327702	A03	35.44	A03_2327702_Sten	-	1	1	2	2	2	2	2	2	2	2	2	2	2	2	2	2	2	2	2	2	2	2	2	2	2	2	2	2	2	2	2	2	2	2	2	2	2	2	2	2	2
AX-147215573	Aradu.A03	3808006	Aradu.A03	3808006	A03	51.02	A03_3808006_Sten	-	1	1	2	2	2	2	2	2	2	2	2	2	2	2	2	2	2	2	2	2	2	2	2	2	2	2	2	2	2	2	2	2	2	2	2	2	2	2	2	2	2
AX-147215631	Aradu.A03	4763112	Aradu.A03	4763112	A03	55.602	A03_4763112_Sten	-	1	1	2	2	2	2	2	2	2	2	2	2	2	2	2	2	2	2	2	2	2	2	2	2	2	2	2	2	2	2	2	2	2	2	2	2	2	2	2	2	2
AX-147215659	Aradu.A03	5242661	Aradu.A03	5242661	A03	56.005	A03_5242661_Sten	-	1	1	2	2	2	2	2	2	2	2	2	2	2	2	2	2	2	2	2	2	2	2	2	2	2	2	2	2	2	2	2	2	2	2	2	2	2	2	2	2	2
AX-147215688	Aradu.A03	6058658	Aradu.A03	6058658	A03	58.492	A03_6058658_Sten	-	1	1	2	2	2	2	2	2	2	2	2	2	2	2	2	2	2	2	2	2	2	2	2	2	2	2	2	2	2	2	2	2	2	2	2	2	2	2	2	2	2
AX-147216035	Aradu.A03	12860261	Aradu.A03	12860261	A03	73.175	A03_12860261_Sten	-	1	1	2	2	2	2	2	2	2	2	2	2	2	2	2	2	2	2	2	2	2	2	2	2	2	2	2	2	2	2	2	2	2	2	2	2	2	2	2	2	2
AX-147215901	Aradu.A03	9964591	Aradu.A03	9964591	A03	74.447	A03_9964591_Sten	-	1	1	2	2	2	2	2	2	2	2	2	2	2	2	2	2	2	2	2	2	2	2	2	2	2	2	2	2	2	2	2	2	2	2	2	2	2	2	2	2	2
AX-147216011	Aradu.A03	12163967	Aradu.A03	12163967	A03	78.168	A03_12163967_Sten	-	1	1	2	2	2	2	2	2	2	2	2	2	2	2	2	2	2	2	2	2	2	2	2	2	2	2	2	2	2	2	2	2	2	2	2	2	2	2	2	2	2
AX-147244080	Araip.B03	22444306	Aradu.A03	19856859	A03	90.28	A03_19856859_Sten	-	1	1	2	2	1	1	1	1	1	1	2	2	1	1	1	-	1	1	1	1	1	3	1	1	1	1	1	1	1	1	1	1	1	1	1	1	1	1	1	1	1
AX-147244084	Araip.B03	22445392	Araip.B03•	22445392	A03	91.506	B03•_22445392_Sten	-	1	1	2	2	-	3	3	3	3	3	-	2	3	-	3	3	3	3	3	3	3	2	3	-	3	3	3	3	3	-	3	3	1	3	3	-	3	3	-	3	3
AX-147216341	Aradu.A03	22722576	Aradu.A03	22722576	A03	97.333	A03_22722576_Sten	-	1	1	2	2	2	2	2	2	2	2	2	2	2	2	2	2	2	2	2	2	2	2	2	2	2	2	2	2	2	3	2	2	3	2	2	2	2	2	2	2	2
AX-147216380	Aradu.A03	24640457	Aradu.A03	24640457	A03	98.277	A03_24640457_Sten	-	1	1	2	2	2	2	2	2	2	2	2	2	2	2	2	2	2	2	2	2	2	2	2	2	2	2	2	2	2	3	2	2	3	2	2	2	2	2	2	2	2
AX-147216485	Aradu.A03	26994891	Aradu.A03	26994891	A03	99.879	A03_26994891_Sten	-	1	1	2	2	2	2	2	2	2	2	2	2	2	2	2	2	2	2	2	2	2	2	2	2	2	2	2	2	2	3	2	2	3	2	2	2	2	2	2	2	2
AX-147216512	Aradu.A03	27813965	Aradu.A03	27813965	A03	102.956	A03_27813965_Sten	-	1	1	2	2	2	2	2	2	2	2	2	2	2	2	2	2	2	2	2	2	2	2	2	2	2	2	2	2	2	1	2	2	1	2	2	2	2	2	2	2	2
AX-147216537	Aradu.A03	28985376	Aradu.A03	28985376	A03	104.285	A03_28985376_Sten	-	1	1	2	2	2	2	2	2	2	2	2	2	2	2	2	2	2	2	2	2	2	2	2	2	2	2	2	2	2	3	2	2	3	2	2	2	2	2	2	2	2
AX-147216272	Aradu.A03	20811542	Aradu.A03	20811542	A03	106.661	A03_20811542_Sten	-	1	1	2	2	2	2	2	2	2	2	2	2	2	2	2	2	2	2	2	2	2	2	2	2	2	2	2	2	2	3	2	2	3	2	2	2	2	2	2	2	2
AX-147216663	Aradu.A03	33077138	Aradu.A03	33077138	A03	109.369	A03_33077138_Sten	-	1	1	2	2	2	2	2	2	2	2	2	2	2	2	2	2	2	2	2	2	2	2	2	2	2	2	2	2	2	3	2	2	3	2	2	2	2	2	2	2	2
AX-147217131	Aradu.A03	91149853	Aradu.A03	91149853	A03	130.274	A03_91149853_Sten	-	1	1	2	2	2	2	2	2	2	2	2	2	2	2	2	2	2	2	2	2	2	2	2	2	2	2	2	2	2	3	2	2	3	2	2	2	2	2	2	2	2
AX-147217043	Aradu.A03	71754595	Aradu.A03	71754595	A03	132.567	A03_71754595_Sten	-	1	1	2	2	2	2	2	2	2	2	2	2	2	2	2	2	2	2	2	2	2	2	2	2	2	2	2	2	2	3	2	2	3	2	2	2	2	2	2	2	2
AX-147217102	Aradu.A03	85054303	Aradu.A03	85054303	A03	134.156	A03_85054303_Sten	-	1	1	2	2	2	2	2	2	2	2	2	2	2	2	2	2	2	2	2	2	2	2	2	2	2	2	2	2	2	1	2	2	1	2	2	2	2	2	2	2	2
AX-147217191	Aradu.A03	100932532	Aradu.A03	100932532	A03	135.453	A03_100932532_Sten	-	1	1	2	2	2	2	2	2	2	2	2	2	2	2	2	2	2	2	2	2	2	2	2	2	2	2	2	2	2	3	2	2	3	2	2	2	2	2	2	2	2
AX-147217180	Aradu.A03	100096163	Aradu.A03	100096163	A03	136.032	A03_100096163_Sten	-	1	1	2	2	2	2	2	2	2	2	2	2	2	2	2	2	2	2	2	2	2	2	2	2	2	2	2	2	2	3	2	2	3	2	2	2	2	2	2	2	2
AX-147217299	Aradu.A03	108830624	Aradu.A03	108830624	A03	137.809	A03_108830624_Sten	-	1	1	2	2	2	1	2	2	2	2	2	2	2	2	2	2	2	2	2	2	2	2	2	2	2	-	2	2	2	1	2	2	1	2	2	2	2	2	2	2	2
AX-147217342	Aradu.A03	110293559	Aradu.A03	110293559	A03	139.696	A03_110293559_Sten	-	1	1	2	2	2	2	2	2	2	2	2	2	2	2	2	2	2	2	2	2	2	2	2	2	2	2	2	2	2	3	2	2	3	2	2	2	2	2	2	2	2
AX-147217486	Aradu.A03	115670557	Aradu.A03	115670557	A03	144.081	A03_115670557_Sten	-	1	1	2	2	2	2	2	2	2	2	2	2	2	2	2	2	2	2	2	2	2	2	2	2	2	2	2	2	2	3	2	2	3	2	2	2	2	2	2	2	2
AX-147217578	Aradu.A03	117747708	Aradu.A03	117747708	A03	150.291	A03_117747708_Sten	-	1	1	2	2	2	2	2	2	2	2	2	2	2	2	2	2	2	2	2	2	2	2	2	2	2	2	2	2	2	2	2	2	2	2	2	2	2	2	2	2	2
AX-147217602	Aradu.A03	118027452	Aradu.A03	118027452	A03	152.313	A03_118027452_Sten	-	1	1	2	2	2	2	2	2	2	2	2	2	2	2	2	2	2	2	2	2	2	2	2	2	2	2	2	2	2	2	2	2	2	2	2	2	2	2	2	2	2
AX-147217621	Aradu.A03	118410190	Aradu.A03	118410190	A03	154.668	A03_118410190_Sten	-	1	1	2	2	2	2	2	2	2	2	2	2	2	2	2	2	2	2	2	2	2	2	2	2	2	2	2	2	2	2	2	2	2	2	2	2	2	2	2	2	2
AX-147217666	Aradu.A03	119191245	Aradu.A03	119191245	A03	157.64	A03_119191245_Sten	-	1	1	2	2	2	2	2	2	2	2	2	2	2	2	2	2	2	2	2	2	2	2	2	2	2	2	2	2	2	2	2	2	2	2	3	2	2	2	2	2	2
AX-147217767	Aradu.A03	121697210	Aradu.A03	121697210	A03	161.555	A03_121697210_Sten	-	1	1	2	2	2	2	2	2	2	2	2	2	2	2	2	2	2	2	2	2	-	2	2	2	2	2	2	2	2	2	2	2	2	2	1	2	2	2	2	2	2
AX-147217690	Aradu.A03	119760138	Aradu.A03	119760138	A03	163.892	A03_119760138_Sten	-	1	1	2	2	2	2	2	2	2	2	2	2	2	2	2	2	2	2	2	2	2	2	2	2	2	2	2	2	2	2	2	2	2	2	3	2	2	2	2	2	2
AX-147218000	Aradu.A03	125668369	Aradu.A03	125668369	A03	181.355	A03_125668369_Sten	-	1	1	2	2	2	2	2	-	2	2	2	2	2	2	2	2	2	2	2	2	2	2	2	2	2	2	2	2	2	3	2	2	3	2	3	2	2	2	2	2	2
AX-147218132	Aradu.A03	127785012	Aradu.A03	127785012	A03	187.299	A03_127785012_Sten	-	1	1	2	2	2	2	2	2	2	2	2	2	2	2	2	2	2	2	2	2	2	2	2	2	2	2	2	2	2	2	2	3	2	2	3	2	2	2	2	2	2
AX-147218152	Aradu.A03	128169984	Aradu.A03	128169984	A03	188.867	A03_128169984_Sten	-	1	1	2	2	2	2	2	2	2	2	2	2	2	2	2	2	2	2	2	2	2	2	2	2	2	2	2	2	2	2	2	3	2	2	3	2	2	2	2	2	2
AX-147218253	Aradu.A03	129126195	Aradu.A03	129126195	A03	192.69	A03_129126195_Sten	-	1	1	2	2	2	2	2	2	2	2	2	2	2	2	2	2	2	2	2	2	2	2	2	2	2	2	2	2	2	2	2	3	2	2	3	2	2	2	2	2	2
AX-147218304	Aradu.A03	129649608	Aradu.A03	129649608	A03	197.928	A03_129649608_Sten	-	1	1	2	2	2	2	2	2	2	2	2	2	2	2	2	2	2	2	2	2	2	2	2	2	2	2	2	2	2	2	2	1	2	2	1	2	2	2	1	2	2
AX-147218365	Aradu.A03	130403989	Aradu.A03	130403989	A03	201.756	A03_130403989_Sten	-	1	1	2	2	2	2	2	2	2	2	2	2	2	2	2	2	2	2	2	2	2	2	2	2	2	2	2	2	2	2	2	3	2	2	3	2	2	2	3	2	2
AX-147218409	Aradu.A03	130991357	Aradu.A03	130991357	A03	205.463	A03_130991357_Sten	-	1	1	2	2	2	2	2	2	2	2	2	2	2	2	2	2	2	2	2	2	2	2	2	-	2	2	2	2	2	2	2	3	2	3	3	2	2	2	3	2	2
AX-147218446	Aradu.A03	131522694	Aradu.A03	131522694	A03	208.973	A03_131522694_Sten	-	1	1	2	2	2	2	2	2	2	2	2	2	2	2	2	2	2	2	2	2	2	2	2	2	2	2	2	2	2	2	2	3	2	2	3	2	2	2	3	2	2
AX-147218439	Aradu.A03	131460394	Aradu.A03	131460394	A03	212.813	A03_131460394_Sten	-	1	1	2	2	2	2	2	2	2	2	2	2	2	2	2	2	2	2	2	2	2	2	2	2	2	2	2	2	2	2	2	3	2	2	3	2	2	2	3	2	2
AX-147218486	Aradu.A03	131938753	Aradu.A03	131938753	A03	219.772	A03_131938753_Sten	-	1	1	2	2	2	2	2	2	2	2	2	2	2	2	2	2	2	2	2	2	2	2	2	2	2	2	2	2	2	2	2	3	2	2	3	2	2	2	3	2	2
AX-147218506	Aradu.A03	132428208	Aradu.A03	132428208	A03	221.046	A03_132428208_Sten	-	1	1	2	2	2	2	2	2	2	2	2	2	2	2	2	2	2	2	2	2	2	2	2	2	2	2	2	2	2	2	2	3	2	2	3	2	2	2	3	2	2
AX-147218617	Aradu.A03	133464199	Aradu.A03	133464199	A03	230.471	A03_133464199_Sten	-	1	1	2	2	2	2	2	2	2	2	2	2	2	2	2	2	2	2	2	2	2	2	2	2	2	2	2	2	2	2	2	3	2	2	3	2	2	2	3	2	2
AX-147218705	Aradu.A03	134335833	Aradu.A03	134335833	A03	240.615	A03_134335833_Sten	-	1	1	2	2	2	2	2	2	2	2	2	2	2	2	2	2	2	2	2	2	2	2	2	2	2	2	2	2	2	2	2	3	2	2	3	2	2	2	3	2	2
AX-147218741	Aradu.A03	134818517	Aradu.A03	134818517	A03	242.262	A03_134818517_Sten	-	1	1	2	2	2	2	2	2	2	2	2	2	2	2	2	2	2	2	2	2	2	2	2	2	2	2	2	2	2	2	2	3	2	2	3	2	2	2	3	2	2
AX-147218758	Aradu.A04	186370	Aradu.A04	186370	A04	8.85	A04_186370_Sten	-	1	1	2	2	2	2	2	2	2	2	2	2	2	2	2	2	2	2	2	2	2	2	2	2	2	2	2	3	2	2	2	2	2	2	2	2	2	3	2	2	2
AX-147218913	Aradu.A04	1362368	Aradu.A04	1362368	A04	18.464	A04_1362368_Sten	-	1	1	2	2	2	2	2	2	2	2	2	2	2	2	2	2	2	2	2	2	2	2	2	2	2	2	2	3	2	2	2	2	2	2	2	2	2	3	2	2	2
AX-147218852	Aradu.A04	841579	Aradu.A04	841579	A04	23.199	A04_841579_Sten	-	1	1	2	2	2	2	2	2	2	2	2	2	2	2	2	2	2	2	2	2	2	2	2	2	2	2	2	1	2	2	2	2	2	2	2	2	2	1	2	2	2
AX-147218905	Aradu.A04	1330996	Aradu.A04	1330996	A04	25.073	A04_1330996_Sten	-	1	1	2	2	2	2	2	2	2	2	2	2	2	2	2	2	2	2	2	2	-	2	2	2	2	2	2	3	2	2	2	2	2	2	2	2	2	3	2	2	2
AX-147218916	Aradu.A04	1428407	Aradu.A04	1428407	A04	25.871	A04_1428407_Sten	-	1	1	2	2	2	2	2	2	2	2	2	2	2	2	2	2	2	2	2	2	2	2	2	2	2	2	2	3	2	2	2	2	2	2	2	2	2	3	2	2	2
AX-147218960	Aradu.A04	1903375	Aradu.A04	1903375	A04	30.16	A04_1903375_Sten	-	1	1	2	2	2	2	2	2	2	2	2	2	2	2	2	2	2	2	2	2	2	2	2	2	2	2	2	3	2	2	2	2	2	2	2	2	2	3	2	2	2
AX-147218990	Aradu.A04	2341583	Aradu.A04	2341583	A04	32.802	A04_2341583_Sten	-	1	1	2	2	2	2	2	2	2	2	2	2	2	2	2	2	2	2	2	2	2	2	2	2	2	2	2	2	2	2	2	2	2	2	2	2	2	2	2	2	2
AX-147219040	Aradu.A04	2755924	Aradu.A04	2755924	A04	36.912	A04_2755924_Sten	-	1	1	2	2	2	2	2	2	2	2	2	2	2	2	2	2	2	2	2	2	2	2	2	2	2	2	2	2	2	2	2	2	2	2	2	2	2	2	2	2	2
AX-147219035	Aradu.A04	2737129	Aradu.A04	2737129	A04	37.295	A04_2737129_Sten	-	1	1	2	2	2	2	2	2	2	2	2	2	2	2	2	2	2	2	2	2	2	2	2	2	2	2	2	2	2	2	2	2	2	2	2	2	2	2	2	2	2
AX-147219075	Aradu.A04	3019208	Aradu.A04	3019208	A04	41.105	A04_3019208_Sten	-	1	1	2	2	2	2	2	2	2	2	2	2	2	2	2	2	2	2	2	2	2	2	2	2	2	2	2	2	2	2	2	2	2	2	2	2	2	2	2	2	2
AX-147219071	Aradu.A04	2986913	Aradu.A04	2986913	A04	43.122	A04_2986913_Sten	-	1	1	2	2	2	2	2	2	2	2	2	2	2	2	2	2	2	2	2	2	2	2	2	2	2	2	2	2	2	2	2	2	2	2	2	2	2	2	2	2	2
AX-147219138	Aradu.A04	3712941	Aradu.A04	3712941	A04	48	A04_3712941_Sten	-	1	1	2	2	2	2	2	2	2	2	2	2	2	2	2	2	2	2	2	2	2	2	2	2	2	2	2	2	2	2	2	2	2	2	2	2	2	2	2	2	2
AX-147219127	Aradu.A04	3517899	Aradu.A04	3517899	A04	48.57	A04_3517899_Sten	-	1	1	2	2	2	2	2	2	2	2	2	2	2	2	2	2	2	2	2	2	2	2	2	2	2	2	2	2	2	2	2	2	2	2	2	2	2	2	2	2	2
AX-147219161	Aradu.A04	4216107	Aradu.A04	4216107	A04	52.52	A04_4216107_Sten	-	1	1	2	2	2	2	2	2	2	2	2	2	2	2	2	2	2	2	2	2	2	2	2	2	2	2	2	2	2	2	2	2	2	2	2	2	2	2	2	2	2
AX-147219256	Aradu.A04	6528613	Aradu.A04	6528613	A04	63.466	A04_6528613_Sten	-	1	1	2	2	2	2	2	2	2	2	2	2	2	2	2	2	2	2	2	2	2	2	2	2	2	2	2	2	2	3	2	2	2	2	2	2	2	3	2	2	2
AX-147219466	Aradu.A04	10403187	Aradu.A04	10403187	A04	76.251	A04_10403187_Sten	-	1	1	2	2	2	2	2	2	2	2	2	2	2	2	2	2	2	2	2	2	2	2	2	2	2	2	2	2	2	3	2	2	2	2	2	2	2	3	2	2	2
AX-147219517	Aradu.A04	12779729	Aradu.A04	12779729	A04	79.89	A04_12779729_Sten	-	1	1	2	2	2	-	2	-	2	2	2	2	2	2	2	2	2	2	2	2	2	2	2	2	2	2	2	2	2	3	2	2	2	3	2	2	2	3	2	-	2
AX-147219503	Aradu.A04	12230276	Aradu.A04	12230276	A04	80.901	A04_12230276_Sten	-	1	1	2	2	2	2	2	3	-	2	2	2	2	2	2	2	2	2	2	2	2	2	2	2	2	2	2	2	2	3	2	2	2	-	2	2	2	3	2	3	2
AX-147219646	Aradu.A04	18406467	Aradu.A04	18406467	A04	83.98	A04_18406467_Sten	-	1	1	2	2	2	2	2	2	2	2	2	2	2	2	2	2	2	2	2	2	2	2	2	2	2	2	2	2	2	2	2	2	2	2	2	2	2	2	2	3	2
AX-147219833	Aradu.A04	31201580	Aradu.A04	31201580	A04	88.319	A04_31201580_Sten	-	1	1	2	2	2	2	2	2	2	2	2	2	2	2	2	2	2	2	2	2	2	2	2	2	2	2	2	2	2	2	2	2	2	2	2	2	2	2	2	3	2
AX-147219761	Aradu.A04	26018057	Aradu.A04	26018057	A04	90.557	A04_26018057_Sten	-	1	1	2	2	2	2	2	2	2	2	2	2	2	2	2	2	2	2	2	2	2	2	2	2	2	2	2	2	2	2	2	2	2	2	2	2	2	2	2	3	2
AX-147219969	Aradu.A04	43910476	Aradu.A04	43910476	A04	96.275	A04_43910476_Sten	-	1	1	2	2	2	2	2	-	2	2	2	2	2	2	2	2	2	2	2	2	2	2	2	2	2	2	2	2	2	2	2	2	2	2	2	2	2	2	2	3	2
AX-147220250	Aradu.A04	85249177	Aradu.A04	85249177	A04	104.567	A04_85249177_Sten	-	1	1	2	2	2	2	2	2	2	2	2	2	2	2	2	2	2	2	2	2	2	2	2	2	2	2	2	2	2	2	2	2	2	2	2	2	2	2	2	1	2
AX-147220154	Aradu.A04	76565873	Aradu.A04	76565873	A04	109.698	A04_76565873_Sten	-	1	1	2	2	2	2	2	2	2	2	2	2	2	2	2	2	2	2	2	2	2	2	2	2	2	2	2	2	2	2	2	2	2	2	2	2	2	2	2	3	2
AX-147220290	Aradu.A04	89924581	Aradu.A04	89924581	A04	113.168	A04_89924581_Sten	-	1	1	2	2	2	2	2	2	2	2	2	2	2	2	2	2	2	2	2	2	2	2	2	2	2	2	2	2	2	2	2	2	2	2	2	2	2	2	2	1	2
AX-147220040	Aradu.A04	53185121	Aradu.A04	53185121	A04	114.891	A04_53185121_Sten	-	1	1	2	2	2	2	2	2	2	2	2	2	2	2	2	2	2	2	2	2	2	2	2	2	2	2	2	2	2	2	2	2	2	2	2	2	2	2	2	2	2
AX-147220404	Aradu.A04	98758169	Aradu.A04	98758169	A04	122.299	A04_98758169_Sten	-	1	1	2	2	2	2	2	2	2	2	2	2	2	2	2	2	2	2	2	2	2	2	2	2	2	2	2	2	2	2	2	2	2	2	2	2	2	2	2	3	2
AX-147220481	Aradu.A04	103964432	Aradu.A04	103964432	A04	124.854	A04_103964432_Sten	-	1	1	2	2	2	2	2	2	2	2	2	2	2	2	2	2	2	2	2	2	2	2	2	2	2	2	2	2	2	2	2	2	2	2	2	2	2	2	2	1	2
AX-147220500	Aradu.A04	104172441	Aradu.A04	104172441	A04	125.974	A04_104172441_Sten	-	1	1	2	2	2	2	2	2	2	2	2	2	2	2	2	2	2	2	2	2	2	2	2	2	2	2	2	2	2	2	2	2	2	2	2	2	2	2	2	1	2
AX-147220633	Aradu.A04	108230713	Aradu.A04	108230713	A04	137.218	A04_108230713_Sten	-	1	1	2	2	2	2	2	2	2	2	2	2	2	2	2	2	2	2	2	2	2	2	2	2	2	2	2	2	2	2	2	2	2	2	2	2	2	2	2	1	2
AX-147220708	Aradu.A04	110684871	Aradu.A04	110684871	A04	139.595	A04_110684871_Sten	-	1	1	2	2	2	2	2	2	2	2	2	2	2	2	2	2	2	2	2	2	2	2	2	2	2	2	2	2	2	2	2	2	2	2	2	2	2	2	2	1	2
AX-147220775	Aradu.A04	112403290	Aradu.A04	112403290	A04	142.529	A04_112403290_Sten	-	1	1	2	2	2	2	2	2	2	2	2	2	2	2	2	2	2	2	2	2	2	2	2	2	2	2	2	2	2	2	2	2	2	2	2	2	2	2	2	3	2
AX-147220802	Aradu.A04	112877017	Aradu.A04	112877017	A04	144.364	A04_112877017_Sten	-	1	1	2	2	2	2	2	2	2	2	2	2	2	2	2	2	2	2	2	2	2	2	2	2	2	2	2	2	2	2	2	2	2	2	2	2	2	2	2	1	2
AX-147220842	Aradu.A04	113654774	Aradu.A04	113654774	A04	146.632	A04_113654774_Sten	-	1	1	2	2	2	2	2	2	2	2	2	2	2	2	2	2	2	2	2	2	2	2	2	2	3	2	2	2	2	2	2	2	2	3	3	2	2	2	2	3	2
AX-147220911	Aradu.A04	115264231	Aradu.A04	115264231	A04	180.675	A04_115264231_Sten	-	1	1	2	2	2	2	2	2	2	-	2	2	2	2	2	2	2	2	2	2	2	2	2	2	3	2	2	2	2	2	2	2	2	3	3	2	2	2	2	3	2
AX-147221205	Aradu.A04	119691567	Aradu.A04	119691567	A04	208.742	A04_119691567_Sten	-	1	1	2	2	2	2	2	2	2	2	2	2	2	2	2	2	2	2	2	2	2	2	2	2	3	2	2	2	2	2	2	2	2	3	3	2	2	2	2	3	2
AX-147221314	Aradu.A04	120929244	Aradu.A04	120929244	A04	219.327	A04_120929244_Sten	-	1	1	2	2	2	2	2	2	2	2	2	2	3	2	2	2	2	2	2	2	2	2	2	2	2	2	2	-	2	2	2	2	2	1	-	2	2	2	2	1	2
AX-147248820	Araip.B04	131096856	Aradu.A04	120938084	A04	225.213	A04_120938084_Sten	-	1	1	2	2	2	2	2	2	2	2	2	2	-	2	2	2	2	2	2	2	2	2	2	2	1	2	2	2	2	2	2	2	2	2	-	2	2	2	2	1	2
AX-147249566	Araip.B05	20700172	Aradu.A05	20650154	A05	0	A05_20650154_Sten	-	1	1	2	2	1	1	1	1	2	2	1	3	1	1	1	1	3	1	1	1	1	1	1	1	1	1	3	3	1	1	1	3	1	1	1	1	1	1	1	1	1
AX-147221702	Aradu.A05	8422937	Aradu.A05	8422937	A05	23.494	A05_8422937_Sten	-	1	1	2	2	2	2	2	2	2	2	2	2	2	2	2	2	2	2	2	2	2	2	2	2	1	2	2	2	2	2	2	2	2	2	2	2	2	2	2	2	2
AX-147221713	Aradu.A05	8621849	Aradu.A05	8621849	A05	25.917	A05_8621849_Sten	-	1	1	2	2	2	2	2	2	2	2	2	2	2	2	2	2	2	2	2	2	2	2	2	2	2	2	2	2	2	2	2	2	2	2	2	2	2	2	2	2	2
AX-147221691	Aradu.A05	8040921	Aradu.A05	8040921	A05	27.276	A05_8040921_Sten	-	1	1	2	2	2	2	2	2	2	2	2	2	2	2	2	2	2	2	2	2	2	2	2	2	2	2	2	2	2	2	2	2	2	2	2	2	2	2	2	2	2
AX-147221684	Aradu.A05	7919003	Aradu.A05	7919003	A05	28.571	A05_7919003_Sten	-	1	1	2	2	2	2	2	2	2	-	2	2	2	2	2	2	2	2	2	2	2	2	2	2	2	2	2	2	2	2	2	2	2	2	-	2	2	2	2	2	2
AX-147221688	Aradu.A05	7958564	Aradu.A05	7958564	A05	29.347	A05_7958564_Sten	-	1	1	2	2	2	2	2	2	2	2	2	2	2	2	2	2	2	2	2	2	2	2	2	2	2	2	2	2	2	2	2	2	2	2	2	2	2	2	2	2	2
AX-147221776	Aradu.A05	10183605	Aradu.A05	10183605	A05	31.681	A05_10183605_Sten	-	1	1	2	2	2	2	2	2	2	2	2	2	2	2	2	2	2	2	2	2	2	2	2	2	2	2	2	2	2	2	2	2	2	2	2	2	2	2	2	2	2
AX-147221874	Aradu.A05	13259270	Aradu.A05	13259270	A05	35.562	A05_13259270_Sten	-	1	1	2	2	2	2	2	2	2	2	2	2	2	2	2	2	2	2	2	2	2	2	2	2	2	2	2	2	2	2	2	2	2	2	2	2	2	2	2	2	2
AX-147222142	Aradu.A05	20099592	Aradu.A05	20099592	A05	40.551	A05_20099592_Sten	-	1	1	2	2	2	2	2	2	2	2	2	2	2	2	2	2	2	2	2	2	2	2	2	2	2	2	2	2	2	2	2	2	2	2	2	2	2	2	2	2	2
AX-147222046	Aradu.A05	17231044	Aradu.A05	17231044	A05	41.609	A05_17231044_Sten	-	1	1	2	2	2	2	2	2	2	2	2	2	2	2	2	2	2	2	2	2	2	2	2	2	2	2	2	2	2	2	2	2	2	2	2	2	2	2	2	2	2
AX-147222047	Aradu.A05	17232224	Aradu.A05	17232224	A05	42.381	A05_17232224_Sten	-	1	1	2	2	2	2	2	2	2	2	2	2	2	2	2	2	2	2	2	2	2	2	2	2	2	2	2	2	2	2	2	2	2	2	2	2	2	2	2	2	2
AX-147222237	Aradu.A05	23757186	Aradu.A05	23757186	A05	56.446	A05_23757186_Sten	-	1	1	2	2	2	2	2	2	2	2	2	2	2	2	2	2	2	2	2	2	2	2	2	2	2	2	2	2	2	2	2	2	2	2	2	2	2	2	2	2	2
AX-147222358	Aradu.A05	32342436	Aradu.A05	32342436	A05	56.966	A05_32342436_Sten	-	1	1	2	2	2	2	2	2	2	2	2	2	2	2	2	2	2	2	-	2	2	2	2	2	2	2	2	2	2	2	2	2	2	2	2	2	2	2	2	2	2
AX-147222496	Aradu.A05	50529881	Aradu.A05	50529881	A05	58.647	A05_50529881_Sten	-	1	1	2	2	2	2	2	2	2	2	2	2	2	2	2	2	2	2	2	2	2	2	2	2	2	2	2	2	2	2	2	2	2	2	2	2	2	2	2	2	2
AX-147222936	Aradu.A05	86654618	Aradu.A05	86654618	A05	65.928	A05_86654618_Sten	-	1	1	2	2	2	2	2	2	2	2	2	2	2	2	2	2	2	2	2	2	2	2	2	2	2	2	2	2	2	2	2	2	2	2	2	2	2	2	2	2	2
AX-147223345	Aradu.A05	95829469	Aradu.A05	95829469	A05	70.863	A05_95829469_Sten	-	1	1	2	2	2	2	2	2	2	2	2	2	2	2	2	2	2	2	2	2	2	2	2	2	2	2	2	2	2	2	2	2	2	2	2	2	2	2	2	2	2
AX-147223371	Aradu.A05	96432005	Aradu.A05	96432005	A05	72.256	A05_96432005_Sten	-	1	1	2	2	2	2	2	2	2	2	2	2	2	2	2	2	2	2	2	2	2	2	2	2	2	2	2	2	2	2	2	2	2	2	2	2	2	2	2	2	2
AX-147250318	Araip.B05	122956001	Aradu.A05	100502781	A05	87.904	A05_100502781_Sten	-	1	1	2	2	2	2	2	2	2	2	2	2	2	2	2	2	2	2	2	2	2	2	2	2	2	2	2	2	2	2	2	2	2	2	2	2	2	2	2	2	2
AX-147223510	Aradu.A05	100520681	Aradu.A05	100520681	A05	88.738	A05_100520681_Sten	-	1	1	2	2	2	2	2	2	2	2	2	2	2	2	2	2	2	2	2	2	2	2	2	2	2	2	2	-	2	2	2	2	2	3	2	2	2	2	2	2	2
AX-147223533	Aradu.A05	101084410	Aradu.A05	101084410	A05	91.066	A05_101084410_Sten	-	1	1	2	2	2	2	2	2	2	2	2	2	2	2	2	2	2	2	2	2	2	2	2	2	2	2	2	2	2	2	2	2	2	2	2	2	2	2	2	2	2
AX-147223581	Aradu.A05	102045942	Aradu.A05	102045942	A05	94.804	A05_102045942_Sten	-	1	1	2	2	2	2	2	2	2	2	2	2	2	2	2	2	2	2	2	2	2	2	2	2	2	2	2	2	2	2	2	2	2	2	2	2	2	2	2	2	2
AX-147223696	Aradu.A05	104206477	Aradu.A05	104206477	A05	100.689	A05_104206477_Sten	-	1	1	2	2	2	2	2	2	2	2	2	2	2	2	2	2	2	2	2	2	2	2	3	2	2	2	2	2	2	2	2	2	2	2	2	2	2	2	2	2	2
AX-147224108	Aradu.A06	517702	Aradu.A06	517702	A06	0	A06_517702_Sten	-	1	1	2	2	2	2	2	2	2	2	2	2	2	2	2	2	2	2	2	2	2	2	2	2	2	2	1	2	2	2	2	2	2	2	2	2	2	2	2	2	2
AX-147224165	Aradu.A06	1222129	Aradu.A06	1222129	A06	11.509	A06_1222129_Sten	-	1	1	2	2	2	2	2	2	2	2	2	2	2	2	2	2	2	2	2	2	2	2	2	2	2	2	3	2	2	2	2	2	2	2	2	2	2	2	2	2	2
AX-147224248	Aradu.A06	2371320	Aradu.A06	2371320	A06	25.187	A06_2371320_Sten	-	1	1	2	2	2	2	2	2	2	2	2	2	2	2	2	2	2	2	2	2	2	2	2	2	2	2	3	2	2	2	2	2	2	2	2	2	2	2	2	2	2
AX-147224251	Aradu.A06	2375139	Aradu.A06	2375139	A06	26.579	A06_2375139_Sten	-	1	1	2	2	2	2	2	2	2	2	2	2	2	2	2	2	2	2	2	2	2	2	2	2	2	2	1	2	2	2	2	2	2	2	2	2	2	2	2	2	2
AX-147224280	Aradu.A06	2863952	Aradu.A06	2863952	A06	31.894	A06_2863952_Sten	-	1	1	2	2	2	2	2	2	2	2	2	2	2	2	2	2	2	2	2	2	2	2	2	2	2	2	2	2	2	2	2	2	2	2	2	2	2	2	2	2	2
AX-147224316	Aradu.A06	3474367	Aradu.A06	3474367	A06	50.983	A06_3474367_Sten	-	1	1	2	2	2	2	2	2	2	2	2	2	2	2	2	2	2	2	2	2	2	2	2	2	2	2	2	2	2	2	2	2	2	2	2	2	2	2	2	2	2
AX-147224370	Aradu.A06	4261015	Aradu.A06	4261015	A06	55.631	A06_4261015_Sten	-	1	1	2	2	2	2	2	2	2	2	2	2	2	2	2	2	2	2	2	2	2	2	2	2	2	2	2	2	2	2	2	2	2	-	2	2	2	2	2	2	2
AX-147224372	Aradu.A06	4280783	Aradu.A06	4280783	A06	56.257	A06_4280783_Sten	-	1	1	2	2	2	2	2	2	2	2	2	2	2	2	2	2	2	2	2	2	2	2	2	2	2	2	2	2	2	2	2	2	2	2	2	2	2	2	2	2	2
AX-147260196	Araip.B09	10172086	Aradu.A09	8267219	A06	66.72	A09_8267219_Sten	-	1	1	2	2	2	2	2	2	2	2	2	2	2	2	2	2	2	2	2	2	2	2	2	2	2	2	2	2	2	2	2	2	2	2	2	2	2	2	2	2	2
AX-147224507	Aradu.A06	5789236	Aradu.A06	5789236	A06	80.827	A06_5789236_Sten	-	1	1	2	2	2	2	2	2	2	2	2	2	2	2	2	2	2	2	2	2	2	2	2	2	2	2	2	2	2	2	2	2	2	2	2	2	2	2	2	2	2
AX-147224542	Aradu.A06	6374094	Aradu.A06	6374094	A06	84.548	A06_6374094_Sten	-	1	1	2	2	2	2	2	2	3	2	2	2	2	2	2	2	2	2	2	2	2	2	2	2	2	2	2	2	2	2	2	2	2	2	2	2	2	2	2	2	2
AX-147224569	Aradu.A06	6596410	Aradu.A06	6596410	A06	86.334	A06_6596410_Sten	-	1	1	2	2	2	2	2	2	2	2	2	2	2	2	2	2	2	2	2	2	2	2	2	2	2	2	2	2	2	2	2	2	2	2	2	2	2	2	2	2	2
AX-147224620	Aradu.A06	7334057	Aradu.A06	7334057	A06	89.66	A06_7334057_Sten	-	1	1	2	2	2	2	2	2	2	2	2	2	2	2	2	2	2	2	2	2	2	2	2	2	2	2	2	2	2	2	2	2	2	2	2	2	2	2	2	2	2
AX-147224636	Aradu.A06	7672324	Aradu.A06	7672324	A06	90.743	A06_7672324_Sten	-	1	1	2	2	2	2	2	2	2	2	2	2	2	2	2	2	2	2	2	2	2	2	2	2	2	2	2	2	2	2	2	2	2	2	2	2	2	2	2	2	2
AX-147224664	Aradu.A06	8149649	Aradu.A06	8149649	A06	92.32	A06_8149649_Sten	-	1	1	2	2	2	2	2	2	2	2	2	2	2	2	2	2	2	2	2	2	2	2	2	2	2	2	2	2	2	2	2	2	2	2	2	2	2	2	2	2	2
AX-147224808	Aradu.A06	10688288	Aradu.A06	10688288	A06	98.723	A06_10688288_Sten	-	1	1	2	2	2	2	2	2	2	2	2	2	2	2	2	2	2	2	2	2	2	2	2	2	2	2	2	2	2	2	2	2	2	2	2	2	2	2	2	2	2
AX-147225078	Aradu.A06	15715130	Aradu.A06	15715130	A06	134.13	A06_15715130_Sten	-	1	1	2	2	2	2	2	2	2	2	2	2	2	2	2	2	2	2	2	2	2	2	2	2	2	2	2	2	2	2	2	2	2	2	2	2	2	2	2	2	2
AX-147225443	Aradu.A06	66423228	Aradu.A06	66423228	A06	139.567	A06_66423228_Sten	-	1	1	2	2	2	2	2	2	2	2	2	2	2	2	2	2	2	2	2	2	2	2	2	2	2	2	2	2	2	2	2	2	2	2	2	2	2	2	2	2	2
AX-147225334	Aradu.A06	34826404	Aradu.A06	34826404	A06	139.671	A06_34826404_Sten	-	1	1	2	2	2	2	2	2	2	2	2	2	2	2	2	2	2	2	2	2	2	2	2	2	2	2	2	2	2	2	2	2	2	2	2	2	2	2	2	2	2
AX-147225594	Aradu.A06	79851479	Aradu.A06	79851479	A06	153.242	A06_79851479_Sten	-	1	1	2	2	2	2	2	2	2	2	2	2	2	2	2	2	2	2	2	2	2	2	2	2	2	2	2	2	2	2	2	2	2	2	2	2	2	2	2	2	2
AX-147225368	Aradu.A06	52572560	Aradu.A06	52572560	A06	158.013	A06_52572560_Sten	-	1	1	2	2	2	2	2	-	2	2	2	2	2	2	2	2	2	2	2	2	2	2	2	2	2	2	2	2	2	2	2	2	2	2	2	2	2	2	2	2	2
AX-147225228	Aradu.A06	20449670	Aradu.A06	20449670	A06	163.49	A06_20449670_Sten	-	1	1	2	2	2	2	2	2	2	2	2	2	2	2	2	2	2	2	2	2	2	2	2	2	2	2	2	2	2	2	2	2	2	2	2	2	2	2	2	2	2
AX-147225651	Aradu.A06	82779734	Aradu.A06	82779734	A06	179.375	A06_82779734_Sten	-	1	1	2	2	2	2	2	2	2	2	2	2	2	2	2	2	2	2	2	2	2	2	2	2	2	2	2	2	2	2	2	2	2	2	2	2	2	2	2	2	2
AX-147225614	Aradu.A06	80755197	Aradu.A06	80755197	A06	179.695	A06_80755197_Sten	-	1	1	2	2	2	2	2	2	2	2	2	2	2	2	2	2	2	2	2	2	2	2	2	2	2	2	2	2	2	2	2	2	2	2	2	2	2	2	2	2	2
AX-147225660	Aradu.A06	83182983	Aradu.A06	83182983	A06	181.281	A06_83182983_Sten	-	1	1	2	2	2	2	2	2	2	2	2	2	2	2	2	2	2	2	2	2	2	2	2	2	2	2	2	2	2	2	2	2	2	2	2	2	2	2	2	2	2
AX-147225805	Aradu.A06	91658393	Aradu.A06	91658393	A06	185.815	A06_91658393_Sten	-	1	1	2	2	2	2	2	2	2	2	2	2	2	2	2	2	2	2	2	2	2	2	2	2	2	2	2	-	2	2	2	-	2	2	2	2	2	2	2	2	2
AX-147225934	Aradu.A06	97902979	Aradu.A06	97902979	A06	192.564	A06_97902979_Sten	-	1	1	2	2	2	2	2	2	2	2	2	2	2	2	2	2	2	2	2	2	2	2	2	2	2	2	2	2	2	2	2	2	2	2	2	2	2	2	2	2	2
AX-147226037	Aradu.A06	100317242	Aradu.A06	100317242	A06	197.068	A06_100317242_Sten	-	1	1	2	2	2	2	2	2	2	2	2	2	2	2	2	2	2	2	2	2	2	2	2	2	2	2	2	3	2	2	2	2	2	2	2	2	2	2	2	2	2
AX-147225997	Aradu.A06	99250062	Aradu.A06	99250062	A06	204.344	A06_99250062_Sten	-	1	1	2	2	2	2	2	2	2	2	2	2	2	2	2	2	2	2	2	2	2	2	2	2	2	2	2	3	2	2	2	2	2	2	2	2	2	2	2	2	2
AX-147226076	Aradu.A06	101146798	Aradu.A06	101146798	A06	209.738	A06_101146798_Sten	-	1	1	2	2	2	2	2	3	2	2	2	2	2	2	2	2	2	2	2	2	2	2	2	2	2	2	2	3	2	2	2	2	2	-	2	2	2	2	2	2	2
AX-147226086	Aradu.A06	101300979	Aradu.A06	101300979	A06	212.378	A06_101300979_Sten	-	1	1	2	2	2	2	2	2	2	2	2	2	2	2	2	2	2	2	2	2	2	2	2	2	2	2	2	3	2	2	2	2	2	2	2	2	2	2	2	2	2
AX-147226154	Aradu.A06	102679941	Aradu.A06	102679941	A06	214.176	A06_102679941_Sten	-	1	1	2	2	2	2	2	2	2	2	2	2	2	2	2	2	2	2	2	2	2	2	2	2	2	2	2	3	2	2	2	2	2	2	2	2	2	2	2	2	2
AX-147226178	Aradu.A06	103181434	Aradu.A06	103181434	A06	227.793	A06_103181434_Sten	-	1	1	2	2	2	-	2	1	2	2	2	2	2	2	2	2	2	2	2	2	2	2	2	2	2	2	2	2	2	2	2	2	2	2	2	2	2	2	2	2	2
AX-147226189	Aradu.A06	103342388	Aradu.A06	103342388	A06	229.193	A06_103342388_Sten	-	1	1	2	2	2	2	2	2	2	2	2	2	2	2	2	2	2	2	2	2	2	2	2	2	2	2	2	-	2	2	2	2	2	2	2	2	2	2	2	2	2
AX-147226332	Aradu.A06	105470812	Aradu.A06	105470812	A06	235.958	A06_105470812_Sten	-	1	1	2	2	2	2	2	2	2	2	2	2	2	2	2	2	2	2	2	2	2	2	2	2	2	2	2	3	2	2	2	2	2	2	2	2	2	2	2	2	2
AX-147226288	Aradu.A06	105029082	Aradu.A06	105029082	A06	237.825	A06_105029082_Sten	-	1	1	2	2	2	2	2	2	2	2	2	2	2	2	2	2	2	2	2	2	2	2	2	2	2	2	2	3	2	2	2	2	2	2	2	2	2	2	2	2	2
AX-147253944	Araip.B06	131651939	Aradu.A06	107413124	A06	240.073	A06_107413124_Sten	-	1	1	2	2	2	2	2	2	2	2	2	2	2	2	2	2	2	2	2	2	2	2	2	2	2	2	2	3	2	2	2	2	2	2	2	2	2	2	2	2	2
AX-147226482	Aradu.A06	107870484	Aradu.A06	107870484	A06	242.441	A06_107870484_Sten	-	1	1	2	2	2	2	2	2	2	2	2	2	2	2	2	2	2	2	2	2	2	2	2	2	2	2	2	1	2	2	2	2	2	2	2	2	2	2	2	2	2
AX-147253814	Araip.B06	129350095	Aradu.A06	105027206	A06	255.928	A06_105027206_Sten	-	1	1	2	2	2	2	2	2	2	2	2	2	2	2	2	2	2	2	2	2	2	2	2	2	2	2	2	3	2	2	2	2	2	2	2	2	2	2	2	2	2
AX-147254213	Araip.B06	135402668	Aradu.A06	110636050	A06	285.407	A06_110636050_Sten	-	1	1	2	2	1	1	1	1	1	1	2	2	2	1	1	1	1	1	1	1	1	1	3	1	1	1	1	-	1	1	1	1	1	1	1	1	1	1	1	1	1
AX-147226730	Aradu.A06	110905105	Aradu.A06	110905105	A06	297.482	A06_110905105_Sten	-	1	1	2	2	2	2	2	2	2	2	2	2	2	1	2	2	1	2	2	2	2	2	2	1	2	2	2	1	2	2	2	1	2	2	2	2	2	2	2	2	2
AX-147254245	Araip.B06	135785614	Aradu.A06	110930847	A06	298.592	A06_110930847_Sten	-	1	1	2	2	2	2	2	2	2	2	2	2	2	1	2	2	1	2	2	2	2	2	2	1	2	2	2	1	2	2	2	1	2	2	2	2	2	2	2	2	2
AX-147226719	Aradu.A06	110816722	Aradu.A06	110816722	A06	300.222	A06_110816722_Sten	-	1	1	2	2	2	2	2	1	2	2	2	2	2	1	2	2	1	2	2	2	2	2	2	1	2	2	2	1	2	2	2	1	2	2	2	2	2	2	2	2	2
AX-147226720	Aradu.A06	110820404	Aradu.A06	110820404	A06	301.085	A06_110820404_Sten	-	1	1	2	2	2	2	2	2	2	2	2	2	2	3	2	2	3	2	2	2	2	2	2	3	2	2	2	3	2	2	2	3	2	2	2	2	2	2	2	2	2
AX-147226820	Aradu.A06	112447942	Aradu.A06	112447942	A06	312.155	A06_112447942_Sten	-	1	1	2	2	2	2	2	2	2	2	2	2	2	2	2	2	1	2	2	2	2	2	2	2	2	2	1	2	2	2	2	1	2	2	2	2	2	2	2	2	2
AX-147226816	Aradu.A06	112388824	Aradu.A06	112388824	A06	315.515	A06_112388824_Sten	-	1	1	2	2	2	2	2	2	2	2	2	2	2	2	2	2	3	2	2	2	2	2	2	2	2	2	3	2	2	2	2	3	2	2	2	2	2	2	2	2	2
AX-147227046	Aradu.A07	2243719	Aradu.A07	2243719	A07	0	A07_2243719_Sten	-	1	1	2	2	2	2	2	2	2	2	2	2	2	2	2	2	2	2	2	2	2	2	2	2	2	3	2	2	3	3	3	2	3	2	2	2	3	3	2	3	2
AX-147227238	Aradu.A07	3807650	Aradu.A07	3807650	A07	8.154	A07_3807650_Sten	-	1	1	2	2	2	2	2	2	2	2	2	2	2	2	2	2	2	2	2	2	2	2	2	2	2	2	2	2	2	2	2	2	2	2	2	2	2	2	2	2	2
AX-147227276	Aradu.A07	4359598	Aradu.A07	4359598	A07	9.937	A07_4359598_Sten	-	1	1	2	2	2	2	2	2	2	2	2	2	2	2	2	2	2	2	2	2	2	2	2	2	2	2	2	2	2	2	2	2	2	2	2	2	2	2	2	2	2
AX-147227304	Aradu.A07	4510195	Aradu.A07	4510195	A07	12.433	A07_4510195_Sten	-	1	1	2	2	2	2	2	2	2	2	2	2	2	2	2	2	2	2	2	2	2	2	2	2	2	2	2	2	2	2	2	2	2	2	2	2	2	2	2	2	2
AX-147227318	Aradu.A07	4560066	Aradu.A07	4560066	A07	14.848	A07_4560066_Sten	-	1	1	2	2	2	2	2	2	2	2	2	2	2	2	2	2	2	2	2	2	2	2	2	2	2	2	2	2	2	2	2	2	2	2	2	2	2	2	2	2	2
AX-147227391	Aradu.A07	5372319	Aradu.A07	5372319	A07	18.22	A07_5372319_Sten	-	1	1	2	2	2	2	2	2	2	2	2	2	2	2	2	2	2	2	2	2	2	2	2	2	2	2	2	2	2	2	2	2	2	2	2	2	2	2	2	2	2
AX-147227390	Aradu.A07	5364934	Aradu.A07	5364934	A07	31.088	A07_5364934_Sten	-	1	1	2	2	2	2	2	2	2	2	2	2	2	2	2	2	2	2	2	2	2	2	2	2	2	2	2	2	2	2	2	2	2	2	2	2	2	2	2	2	2
AX-147227409	Aradu.A07	5513063	Aradu.A07	5513063	A07	36.824	A07_5513063_Sten	-	1	1	2	2	2	2	2	2	2	2	2	2	2	2	2	2	2	2	2	2	2	2	2	2	2	2	2	2	2	2	2	2	2	2	2	2	2	2	2	2	2
AX-147227491	Aradu.A07	6626371	Aradu.A07	6626371	A07	41.396	A07_6626371_Sten	-	1	1	2	2	2	2	2	2	2	2	2	2	2	2	2	2	2	2	2	2	2	2	2	2	2	2	2	2	2	2	2	2	2	2	2	2	2	2	2	2	2
AX-147227580	Aradu.A07	8218053	Aradu.A07	8218053	A07	56.379	A07_8218053_Sten	-	1	1	2	2	2	2	2	-	2	2	2	2	2	2	2	2	2	2	2	2	2	2	2	2	-	2	2	2	2	2	2	2	2	-	2	2	2	2	2	2	2
AX-147227676	Aradu.A07	10930537	Aradu.A07	10930537	A07	63.562	A07_10930537_Sten	-	1	1	2	2	2	2	2	2	2	2	2	2	2	2	2	2	2	2	2	2	2	2	2	2	2	2	2	2	2	2	2	2	2	2	2	2	2	2	2	2	2
AX-147227821	Aradu.A07	14699755	Aradu.A07	14699755	A07	69.611	A07_14699755_Sten	-	1	1	2	2	2	2	2	2	2	2	2	2	2	2	2	2	2	2	2	2	2	2	2	2	2	2	2	2	2	2	2	2	2	2	2	2	2	2	2	2	2
AX-147227840	Aradu.A07	15199143	Aradu.A07	15199143	A07	71.635	A07_15199143_Sten	-	1	1	2	2	2	2	2	2	2	2	2	2	2	2	2	2	2	2	2	2	2	2	2	2	2	2	2	2	2	2	2	2	2	2	2	2	2	2	2	2	2
AX-147227834	Aradu.A07	14860341	Aradu.A07	14860341	A07	72.931	A07_14860341_Sten	-	1	1	2	2	2	2	2	2	2	2	2	2	2	2	2	2	2	2	2	2	2	2	2	2	2	2	2	2	2	2	2	2	2	2	2	2	2	2	2	2	2
AX-147227833	Aradu.A07	14860287	Aradu.A07	14860287	A07	73.796	A07_14860287_Sten	-	1	1	2	2	2	2	2	2	2	2	2	2	2	2	2	2	2	2	2	2	2	2	2	2	2	2	2	2	2	2	2	2	2	2	2	2	2	2	2	2	2
AX-147227917	Aradu.A07	17133488	Aradu.A07	17133488	A07	75.695	A07_17133488_Sten	-	1	1	2	2	2	2	2	2	2	2	2	2	2	2	2	2	2	2	2	2	2	2	2	2	2	2	2	2	2	2	2	2	2	2	2	2	2	2	2	2	2
AX-147227930	Aradu.A07	17768688	Aradu.A07	17768688	A07	77.553	A07_17768688_Sten	-	1	1	2	2	2	2	2	2	2	2	2	2	2	2	2	2	2	2	2	2	2	2	2	2	2	2	2	2	2	2	2	2	2	2	2	2	2	2	2	2	2
AX-147227919	Aradu.A07	17218154	Aradu.A07	17218154	A07	78.627	A07_17218154_Sten	-	1	1	2	2	2	2	2	2	2	2	2	2	2	2	2	2	2	2	2	2	2	2	2	2	2	2	2	2	2	2	2	2	2	2	2	2	2	2	2	2	2
AX-147228073	Aradu.A07	23988146	Aradu.A07	23988146	A07	83.776	A07_23988146_Sten	-	1	1	2	2	2	2	2	2	2	2	2	2	2	2	2	2	2	2	2	2	2	2	2	2	2	2	2	2	2	2	2	2	2	2	2	2	2	2	2	2	2
AX-147228146	Aradu.A07	28320911	Aradu.A07	28320911	A07	96.021	A07_28320911_Sten	-	1	1	2	2	2	2	2	2	2	2	2	2	2	2	2	2	2	2	2	2	2	2	2	2	2	2	2	2	2	2	2	2	2	2	2	2	2	2	2	2	2
AX-147228139	Aradu.A07	28119195	Aradu.A07	28119195	A07	96.591	A07_28119195_Sten	-	1	1	2	2	2	2	2	2	2	2	2	2	2	2	2	2	2	2	2	2	2	2	2	2	2	2	2	2	2	2	2	2	2	2	2	2	2	2	2	2	2
AX-147228270	Aradu.A07	38770197	Aradu.A07	38770197	A07	98.771	A07_38770197_Sten	-	1	1	2	2	2	2	2	2	2	2	2	2	2	2	2	2	2	2	2	2	2	2	2	2	3	2	2	2	2	2	2	2	2	2	2	2	2	2	2	2	2
AX-147228382	Aradu.A07	49949867	Aradu.A07	49949867	A07	100.747	A07_49949867_Sten	-	1	1	2	2	2	2	2	2	2	2	2	2	2	2	2	2	2	2	2	2	2	2	2	2	2	2	2	2	2	2	2	2	2	2	2	2	2	2	2	2	2
AX-147228528	Aradu.A07	58426772	Aradu.A07	58426772	A07	108.288	A07_58426772_Sten	-	1	1	2	2	2	2	2	2	2	2	2	2	2	2	2	2	2	2	2	2	2	2	2	2	2	2	2	2	2	2	2	2	2	2	2	2	2	2	2	2	2
AX-147228550	Aradu.A07	60064185	Aradu.A07	60064185	A07	108.806	A07_60064185_Sten	-	1	1	2	2	2	2	2	2	2	2	2	2	2	2	2	2	2	2	2	2	2	2	2	2	2	2	2	2	2	2	2	2	2	2	2	2	2	2	2	2	2
AX-147228566	Aradu.A07	61354243	Aradu.A07	61354243	A07	109.811	A07_61354243_Sten	-	1	1	2	2	2	2	2	2	2	2	2	2	2	2	2	2	2	2	2	2	2	2	2	2	2	2	2	2	2	2	2	2	2	2	2	2	2	2	2	2	2
AX-147228576	Aradu.A07	62398239	Aradu.A07	62398239	A07	111.159	A07_62398239_Sten	-	1	1	2	2	2	2	2	2	2	2	2	2	2	2	2	2	2	2	2	2	2	2	2	2	2	2	2	2	2	2	2	2	2	2	2	2	2	2	2	2	2
AX-147228634	Aradu.A07	65957786	Aradu.A07	65957786	A07	112.043	A07_65957786_Sten	-	1	1	2	2	2	2	2	2	2	2	2	2	2	2	2	2	2	2	2	2	2	2	2	2	2	2	2	2	2	2	2	2	2	2	2	2	2	2	2	2	2
AX-147228658	Aradu.A07	67162381	Aradu.A07	67162381	A07	115.093	A07_67162381_Sten	-	1	1	2	2	2	2	2	2	2	2	2	2	2	2	2	2	2	2	2	2	2	2	2	2	2	2	2	2	2	2	2	2	2	2	2	2	2	2	2	2	2
AX-147228759	Aradu.A07	70123570	Aradu.A07	70123570	A07	116.666	A07_70123570_Sten	-	1	1	2	2	2	2	2	2	2	2	2	2	2	2	2	2	2	2	2	2	2	2	2	2	2	2	2	2	2	2	2	2	2	2	2	2	2	2	2	2	2
AX-147228738	Aradu.A07	69596041	Aradu.A07	69596041	A07	117.638	A07_69596041_Sten	-	1	1	2	2	2	2	2	2	2	2	2	2	2	2	2	2	2	2	2	2	2	2	2	2	2	2	2	2	2	2	2	2	2	2	2	2	2	2	2	2	2
AX-147228199	Aradu.A07	34519088	Aradu.A07	34519088	A07	119.556	A07_34519088_Sten	-	1	1	2	2	2	2	2	2	2	2	2	2	2	2	2	2	2	2	2	2	2	2	2	2	2	2	2	2	2	2	2	2	2	2	2	2	2	2	2	2	2
AX-147228204	Aradu.A07	34529379	Aradu.A07	34529379	A07	119.871	A07_34529379_Sten	-	1	1	2	2	2	2	2	2	2	2	2	2	2	2	2	2	2	2	2	2	2	2	2	2	2	2	2	2	2	2	2	2	2	2	2	2	2	2	2	2	2
AX-147229124	Aradu.A07	78927561	Aradu.A07	78927561	A07	120.938	A07_78927561_Sten	-	1	1	2	2	2	2	2	2	2	2	2	2	2	2	2	2	2	2	2	2	2	2	2	2	2	2	2	2	2	2	2	2	2	2	2	2	2	2	2	2	2
AX-147229051	Aradu.A07	76344679	Aradu.A07	76344679	A07	126.477	A07_76344679_Sten	-	1	1	2	2	2	2	2	2	2	2	2	2	2	2	2	2	2	2	2	2	2	2	2	2	2	2	2	2	2	2	2	2	2	2	2	2	2	2	2	2	2
AX-147229019	Aradu.A07	75747120	Aradu.A07	75747120	A07	131.076	A07_75747120_Sten	-	1	1	2	2	2	2	2	2	2	2	2	2	2	2	2	2	2	2	2	2	2	2	2	2	2	2	2	2	2	2	2	2	2	2	2	2	2	2	2	2	2
AX-147228983	Aradu.A07	74520368	Aradu.A07	74520368	A07	132.909	A07_74520368_Sten	-	1	1	2	2	2	2	2	2	2	2	2	2	2	2	2	2	2	2	2	2	2	2	2	2	2	2	2	2	2	2	2	2	2	2	2	2	2	2	2	2	2
AX-147228871	Aradu.A07	72384114	Aradu.A07	72384114	A07	146.645	A07_72384114_Sten	-	1	1	2	2	2	2	2	2	2	2	2	2	2	2	2	2	2	2	2	2	2	2	2	2	2	2	2	2	2	2	2	2	2	2	2	2	2	2	2	2	2
AX-147256944	Araip.B08	520367	Aradu.A07	71736426	A07	153.119	A07_71736426_Sten	-	1	1	2	2	1	1	1	-	2	2	2	2	-	3	3	1	3	1	1	1	1	3	1	3	3	3	1	-	3	1	2	1	3	1	1	3	2	1	1	1	3
AX-147228802	Aradu.A07	71474572	Aradu.A07	71474572	A07	158.431	A07_71474572_Sten	-	1	1	2	2	2	2	2	2	2	2	2	2	2	2	2	2	2	2	2	2	2	2	2	2	2	2	2	2	2	2	2	2	2	2	2	2	2	2	2	2	2
AX-147228791	Aradu.A07	71387264	Aradu.A07	71387264	A07	159.639	A07_71387264_Sten	-	1	1	2	2	2	2	2	2	2	2	2	2	2	2	2	2	2	2	2	2	2	2	2	2	2	2	2	2	2	2	2	2	2	2	2	2	2	2	2	2	2
AX-147228785	Aradu.A07	71124776	Aradu.A07	71124776	A07	165.575	A07_71124776_Sten	-	1	1	2	2	2	2	2	2	2	2	2	2	2	2	2	2	2	2	2	2	2	2	2	2	2	2	2	2	2	2	2	2	2	2	2	2	2	2	2	2	2
AX-147228782	Aradu.A07	71054281	Aradu.A07	71054281	A07	166.136	A07_71054281_Sten	-	1	1	2	2	2	2	2	2	2	2	2	2	2	2	2	2	2	2	2	2	2	2	2	2	2	2	2	2	2	2	2	2	2	2	2	2	2	2	2	2	2
AX-147228764	Aradu.A07	70619039	Aradu.A07	70619039	A07	167.497	A07_70619039_Sten	-	1	1	2	2	2	2	2	2	2	2	2	2	2	2	2	2	2	2	2	2	2	2	2	2	2	2	2	2	2	2	2	2	2	2	2	2	2	2	2	2	2
AX-147229346	Aradu.A08	4440864	Aradu.A08	4440864	A08	15.509	A08_4440864_Sten	-	1	1	2	2	2	2	2	2	2	2	2	2	2	2	2	2	2	2	2	2	2	2	2	2	2	2	2	2	2	2	2	2	2	2	2	2	2	2	2	2	2
AX-147255729	Araip.B07	52594790	Araip.B07•	52594790	A08	16.979	B07•_52594790_Sten	-	1	1	2	2	2	2	2	2	2	2	2	2	2	2	2	2	2	2	2	2	2	2	2	2	2	2	2	2	2	2	2	2	2	2	2	2	2	2	2	2	2
AX-147229479	Aradu.A08	5572280	Aradu.A08	5572280	A08	17.842	A08_5572280_Sten	-	1	1	2	2	2	2	2	2	2	2	2	2	2	2	2	2	2	2	2	2	2	2	2	2	2	2	2	2	2	2	2	2	2	2	2	2	2	2	2	2	2
AX-147229410	Aradu.A08	4910322	Aradu.A08	4910322	A08	18.423	A08_4910322_Sten	-	1	1	2	2	2	2	2	2	2	2	2	2	2	2	2	2	2	2	2	2	2	2	2	2	2	2	2	2	2	2	2	2	2	2	2	2	2	2	2	2	2
AX-147229481	Aradu.A08	5572430	Aradu.A08	5572430	A08	20.248	A08_5572430_Sten	-	1	1	2	2	2	2	2	2	2	2	2	2	2	2	2	2	2	2	2	2	2	2	2	2	2	2	2	2	2	2	2	2	2	2	2	2	2	2	2	2	2
AX-147229642	Aradu.A08	7337536	Aradu.A08	7337536	A08	27.122	A08_7337536_Sten	-	1	1	2	2	2	2	2	2	2	2	2	2	2	2	2	2	2	2	2	2	2	2	2	2	2	2	2	2	2	2	2	2	2	2	2	2	2	2	2	2	2
AX-147229709	Aradu.A08	8571791	Aradu.A08	8571791	A08	32.761	A08_8571791_Sten	-	1	1	2	2	2	2	2	2	2	2	2	2	2	2	2	2	2	2	2	2	2	2	2	2	2	2	2	2	2	2	2	2	2	2	2	2	2	2	2	2	2
AX-147229729	Aradu.A08	8966026	Aradu.A08	8966026	A08	36.86	A08_8966026_Sten	-	1	1	2	2	2	2	2	2	2	2	2	2	2	2	2	2	2	2	2	2	2	2	2	2	2	2	2	2	2	2	2	2	2	2	2	2	2	2	2	2	2
AX-147229740	Aradu.A08	9346039	Aradu.A08	9346039	A08	39.543	A08_9346039_Sten	-	1	1	2	2	2	2	2	2	2	2	2	2	2	2	2	2	2	2	2	2	2	2	2	2	2	2	2	2	2	2	2	2	2	-	2	2	2	2	2	2	2
AX-147229745	Aradu.A08	9360099	Aradu.A08	9360099	A08	42.367	A08_9360099_Sten	-	1	1	2	2	2	2	2	2	2	2	2	2	2	2	2	2	2	2	2	2	2	2	2	2	2	2	2	2	2	2	2	2	2	2	2	2	2	2	2	2	2
AX-147229763	Aradu.A08	10011940	Aradu.A08	10011940	A08	47.185	A08_10011940_Sten	-	1	1	2	2	2	2	2	2	2	2	2	2	2	2	2	2	2	2	2	2	2	2	2	2	2	2	2	2	2	2	2	2	2	2	2	2	2	2	2	2	2
AX-147229769	Aradu.A08	10231063	Aradu.A08	10231063	A08	51.479	A08_10231063_Sten	-	1	1	2	2	2	2	2	3	2	2	2	2	2	2	2	2	2	2	2	2	2	2	2	2	2	2	-	-	2	2	2	2	2	-	-	2	2	2	2	2	2
AX-147229813	Aradu.A08	11067219	Aradu.A08	11067219	A08	52.251	A08_11067219_Sten	-	1	1	2	2	2	2	2	2	2	2	2	2	2	2	2	2	2	2	2	2	2	2	2	2	2	2	2	2	2	2	2	2	2	2	2	2	2	2	2	2	2
AX-147229845	Aradu.A08	11536813	Aradu.A08	11536813	A08	55.63	A08_11536813_Sten	-	1	1	2	2	2	2	2	2	2	-	2	2	2	2	2	2	2	2	2	2	2	2	2	2	-	2	2	2	2	2	2	2	2	2	2	2	2	2	2	2	2
AX-147229882	Aradu.A08	12093185	Aradu.A08	12093185	A08	60.104	A08_12093185_Sten	-	1	1	2	2	2	2	2	2	2	2	2	2	2	2	2	2	2	2	2	2	2	2	2	2	2	2	2	2	2	2	2	2	2	2	2	2	2	2	2	2	2
AX-147229852	Aradu.A08	11713918	Aradu.A08	11713918	A08	61.054	A08_11713918_Sten	-	1	1	2	2	2	2	2	2	2	2	2	2	2	2	2	2	2	2	2	2	2	2	2	2	2	2	2	2	2	2	2	2	2	2	2	2	2	2	2	2	2
AX-147229917	Aradu.A08	12912372	Aradu.A08	12912372	A08	62.69	A08_12912372_Sten	-	1	1	2	2	2	2	2	2	2	2	2	2	2	2	2	2	2	2	2	2	2	2	2	2	2	2	2	2	2	2	2	2	2	2	2	2	2	2	2	2	2
AX-147229992	Aradu.A08	14297495	Aradu.A08	14297495	A08	63.717	A08_14297495_Sten	-	1	1	2	2	2	2	2	2	2	2	2	2	2	2	2	2	2	2	2	2	2	2	2	2	2	2	2	2	2	2	2	2	2	2	2	2	2	2	2	2	2
AX-147230049	Aradu.A08	15036606	Aradu.A08	15036606	A08	64.489	A08_15036606_Sten	-	1	1	2	2	2	2	2	2	2	2	2	2	2	2	2	2	2	2	2	2	2	2	2	2	2	2	2	2	2	2	2	2	2	2	2	2	2	2	2	2	2
AX-147230108	Aradu.A08	15660388	Aradu.A08	15660388	A08	66.814	A08_15660388_Sten	-	1	1	2	2	2	2	2	2	2	2	2	2	2	2	2	2	2	2	2	2	2	2	2	2	2	2	2	2	2	2	2	2	2	2	2	2	2	2	2	2	2
AX-147230088	Aradu.A08	15258018	Aradu.A08	15258018	A08	67.268	A08_15258018_Sten	-	1	1	2	2	2	2	2	2	2	2	2	2	2	2	2	2	2	2	2	2	2	2	2	2	2	2	2	2	2	2	2	2	2	2	2	2	2	2	2	2	2
AX-147230087	Aradu.A08	15257443	Aradu.A08	15257443	A08	67.365	A08_15257443_Sten	-	1	1	2	2	2	2	2	2	2	2	2	2	2	2	2	2	2	2	2	2	2	2	2	2	2	2	2	2	2	2	2	2	2	2	2	2	2	2	2	2	2
AX-147230121	Aradu.A08	15977007	Aradu.A08	15977007	A08	68.361	A08_15977007_Sten	-	1	1	2	2	2	2	2	2	2	2	2	2	2	2	2	2	2	2	2	2	2	2	2	2	2	2	2	2	2	2	2	2	2	2	2	2	2	2	2	2	2
AX-147230197	Aradu.A08	16894853	Aradu.A08	16894853	A08	72.155	A08_16894853_Sten	-	1	1	2	2	2	2	2	2	2	2	2	2	2	2	2	2	2	2	2	2	2	2	2	2	2	2	2	2	2	2	2	2	2	2	2	2	2	2	2	2	2
AX-147230223	Aradu.A08	17706521	Aradu.A08	17706521	A08	73.836	A08_17706521_Sten	-	1	1	2	2	2	2	2	2	2	2	2	2	2	2	2	2	2	2	2	2	2	2	2	2	2	2	2	2	2	2	2	2	2	2	2	2	2	2	2	2	2
AX-147230224	Aradu.A08	17707100	Aradu.A08	17707100	A08	74.163	A08_17707100_Sten	-	1	1	2	2	2	2	2	2	2	2	2	2	2	2	2	2	2	2	2	2	2	2	2	2	2	2	2	2	2	2	2	2	2	2	2	2	2	2	2	2	2
AX-147230319	Aradu.A08	23241307	Aradu.A08	23241307	A08	77.569	A08_23241307_Sten	-	1	1	2	2	2	2	2	2	2	2	2	2	2	2	2	2	2	2	2	2	2	2	2	2	2	2	2	2	2	2	2	2	2	-	2	2	2	2	2	2	2
AX-147230422	Aradu.A08	25003355	Aradu.A08	25003355	A08	80.334	A08_25003355_Sten	-	1	1	2	2	2	2	2	2	2	2	2	2	2	2	2	2	2	2	2	2	2	2	2	2	2	2	2	2	2	2	2	2	2	2	2	2	2	2	2	2	2
AX-147230432	Aradu.A08	25082727	Aradu.A08	25082727	A08	81.189	A08_25082727_Sten	-	1	1	2	2	2	2	2	2	2	2	2	2	2	2	2	2	2	2	2	2	2	2	2	2	2	2	2	2	2	2	2	2	2	2	2	2	2	2	2	2	2
AX-147230437	Aradu.A08	25180600	Aradu.A08	25180600	A08	83.106	A08_25180600_Sten	-	1	1	2	2	2	2	2	2	2	2	2	2	2	2	2	2	2	2	2	2	2	2	2	2	2	2	2	2	2	2	2	2	2	2	2	2	2	2	2	2	2
AX-147230473	Aradu.A08	25916804	Aradu.A08	25916804	A08	84.788	A08_25916804_Sten	-	1	1	2	2	2	2	2	2	2	2	2	2	2	2	2	2	2	2	2	2	2	2	2	2	2	2	2	2	2	2	2	2	2	2	2	2	2	2	2	2	2
AX-147230499	Aradu.A08	26344960	Aradu.A08	26344960	A08	92.471	A08_26344960_Sten	-	1	1	2	2	2	2	2	2	2	2	2	2	2	2	2	2	2	2	2	2	2	2	2	2	2	2	2	2	2	2	2	2	2	2	2	2	2	2	2	2	2
AX-147230507	Aradu.A08	26553699	Aradu.A08	26553699	A08	96.373	A08_26553699_Sten	-	1	1	2	2	2	2	2	2	2	2	2	2	2	2	2	2	2	2	2	2	2	2	2	2	2	2	2	2	2	2	2	2	2	2	2	2	2	2	2	2	2
AX-147230532	Aradu.A08	27221774	Aradu.A08	27221774	A08	97.298	A08_27221774_Sten	-	1	1	2	2	2	2	2	2	2	2	2	2	2	2	2	2	2	2	2	2	2	2	2	2	2	2	2	2	2	2	2	2	2	2	2	2	2	2	2	2	2
AX-147230636	Aradu.A08	29019016	Aradu.A08	29019016	A08	107.378	A08_29019016_Sten	-	1	1	2	2	2	2	2	2	2	2	2	2	2	2	2	2	2	2	2	2	2	2	2	2	2	2	2	2	2	2	2	2	2	2	2	2	2	2	2	2	2
AX-147230672	Aradu.A08	29666660	Aradu.A08	29666660	A08	109.515	A08_29666660_Sten	-	1	1	2	2	2	2	2	2	2	2	2	2	2	2	2	2	2	2	2	2	2	2	2	2	2	2	2	2	2	2	2	2	2	2	2	2	2	2	2	2	2
AX-147230776	Aradu.A08	31537551	Aradu.A08	31537551	A08	118.641	A08_31537551_Sten	-	1	1	2	2	2	2	2	2	2	2	2	2	2	2	2	2	2	2	2	2	2	2	2	2	2	2	2	2	2	2	2	2	2	2	2	2	2	2	2	2	2
AX-147231077	Aradu.A08	37475975	Aradu.A08	37475975	A08	140.071	A08_37475975_Sten	-	1	1	2	2	2	2	2	2	2	2	2	2	2	2	2	2	2	2	2	2	2	2	2	2	2	2	2	2	2	2	2	2	2	2	2	2	2	2	2	2	2
AX-147231118	Aradu.A08	38153059	Aradu.A08	38153059	A08	144.149	A08_38153059_Sten	-	1	1	2	2	2	2	2	2	2	2	2	2	2	2	2	2	2	2	2	2	2	2	2	2	2	2	2	2	2	2	2	2	2	2	2	2	2	2	2	2	2
AX-147231126	Aradu.A08	38180605	Aradu.A08	38180605	A08	146.589	A08_38180605_Sten	-	1	1	2	2	2	2	2	2	2	2	2	2	2	2	2	2	2	2	2	2	2	2	2	2	2	2	2	2	2	2	2	2	2	2	2	2	2	2	2	2	2
AX-147231135	Aradu.A08	38254290	Aradu.A08	38254290	A08	147.362	A08_38254290_Sten	-	1	1	2	2	2	2	2	2	2	2	2	2	2	2	2	2	2	2	2	2	2	2	2	2	2	2	2	2	2	2	2	2	2	2	2	2	2	2	2	2	2
AX-147231148	Aradu.A08	38319070	Aradu.A08	38319070	A08	147.64	A08_38319070_Sten	-	1	1	2	2	2	2	2	2	2	2	2	2	2	2	2	2	2	2	2	2	2	2	2	2	2	2	2	2	2	2	2	2	2	2	2	2	2	2	2	2	2
AX-147231204	Aradu.A08	39171433	Aradu.A08	39171433	A08	149.967	A08_39171433_Sten	-	1	1	2	2	2	2	2	2	2	2	2	2	2	2	2	2	2	2	2	2	2	2	2	2	2	2	2	2	2	2	2	2	2	2	2	2	2	2	2	2	2
AX-147231206	Aradu.A08	39208957	Aradu.A08	39208957	A08	149.967	A08_39208957_Sten	-	1	1	2	2	2	2	2	2	2	2	2	2	2	2	2	2	2	2	2	2	2	2	2	2	2	2	2	2	2	2	2	2	2	2	2	2	2	2	2	2	2
AX-147258789	Araip.B08	110962412	Aradu.A08	39271659	A08	150.551	A08_39271659_Sten	-	1	1	2	2	2	2	2	2	2	2	2	2	2	2	2	2	2	2	2	2	2	2	2	2	2	2	2	2	2	2	2	2	2	2	2	2	2	2	2	2	2
AX-147231272	Aradu.A08	40053900	Aradu.A08	40053900	A08	152.248	A08_40053900_Sten	-	1	1	2	2	2	2	2	2	2	2	2	2	2	2	2	2	2	2	2	2	2	2	2	2	2	2	2	2	2	2	2	2	2	2	2	2	2	2	2	2	2
AX-147231307	Aradu.A08	40886460	Aradu.A08	40886460	A08	155.715	A08_40886460_Sten	-	1	1	2	2	2	2	2	2	2	2	2	2	2	2	2	2	2	2	2	2	2	2	2	2	2	2	2	2	2	2	2	2	2	2	2	2	2	2	2	2	2
AX-147258971	Araip.B08	117246674	Aradu.A08	41498936	A08	163.225	A08_41498936_Sten	-	1	1	2	2	2	2	2	2	2	2	2	2	2	2	2	2	2	2	2	2	2	2	2	2	2	2	2	2	2	2	2	2	2	2	2	2	2	2	2	2	2
AX-147231410	Aradu.A08	42383674	Aradu.A08	42383674	A08	164.066	A08_42383674_Sten	-	1	1	2	2	2	2	2	2	2	2	2	2	2	2	2	2	2	2	2	2	2	2	2	2	2	2	2	2	2	2	2	2	2	2	2	2	2	2	2	2	2
AX-147231500	Aradu.A08	43354782	Aradu.A08	43354782	A08	167.52	A08_43354782_Sten	-	1	1	2	2	2	2	2	2	2	2	2	2	2	2	2	2	2	2	2	2	2	2	2	2	2	2	2	2	2	2	2	2	2	2	2	2	2	2	2	2	2
AX-147231647	Aradu.A08	44987016	Aradu.A08	44987016	A08	173.958	A08_44987016_Sten	-	1	1	2	2	2	2	2	2	2	2	2	2	2	2	2	2	2	2	2	2	2	2	2	2	2	2	2	2	2	2	2	2	2	2	2	2	2	2	2	2	2
AX-147231716	Aradu.A08	45750189	Aradu.A08	45750189	A08	175.828	A08_45750189_Sten	-	1	1	2	2	2	2	2	2	2	2	2	2	2	2	2	2	2	2	2	2	2	2	2	2	2	2	2	2	2	2	2	2	2	2	2	2	2	2	2	2	2
AX-147231795	Aradu.A08	46292805	Aradu.A08	46292805	A08	177.436	A08_46292805_Sten	-	1	1	2	2	2	2	2	2	2	2	2	2	2	2	2	2	2	2	2	2	2	2	2	2	2	2	2	2	2	2	2	2	2	2	2	2	2	2	2	2	2
AX-147231933	Aradu.A08	48256544	Aradu.A08	48256544	A08	189.878	A08_48256544_Sten	-	1	1	2	2	2	2	2	2	2	2	2	2	2	2	2	2	2	2	2	2	2	2	2	2	2	2	2	2	2	2	2	2	2	2	2	2	2	2	2	2	2
AX-147216857	Aradu.A03	40531384	Aradu.A03	40531384	A08	196.191	A03_40531384_Sten	-	1	1	2	2	2	2	2	2	2	2	2	2	2	2	2	2	2	2	2	2	2	2	2	2	2	2	2	2	2	2	2	2	2	2	2	2	2	2	2	2	2
AX-147216850	Aradu.A03	40250685	Aradu.A03	40250685	A08	201.291	A03_40250685_Sten	-	1	1	2	2	2	2	2	2	2	2	2	2	2	2	2	2	2	2	2	2	2	2	2	2	2	2	2	2	2	2	2	2	2	2	2	2	2	2	2	2	2
AX-147216800	Aradu.A03	39879307	Aradu.A03	39879307	A08	203.994	A03_39879307_Sten	-	1	1	2	2	2	2	2	2	2	2	2	2	2	2	2	2	2	2	2	2	2	2	2	2	2	2	2	2	2	2	2	2	2	2	2	2	2	2	2	2	2
AX-147234444	Aradu.A09	115268602	Aradu.A09	115268602	A09	1.865	A09_115268602_Sten	-	1	1	2	2	2	2	2	2	2	2	2	2	2	2	2	2	2	2	2	2	2	2	2	2	2	2	2	2	2	2	2	2	2	2	2	2	2	2	2	2	2
AX-147232213	Aradu.A09	2002461	Aradu.A09	2002461	A09	19.013	A09_2002461_Sten	-	1	1	2	2	2	2	2	2	2	2	2	2	2	2	2	2	2	2	2	2	2	2	2	2	2	2	2	2	2	2	2	2	2	2	2	2	2	2	2	2	2
AX-147232270	Aradu.A09	2745193	Aradu.A09	2745193	A09	22.635	A09_2745193_Sten	-	1	1	2	2	2	2	2	2	2	2	2	2	2	2	2	2	2	2	2	2	2	2	2	2	2	2	2	3	2	2	2	2	2	2	2	2	2	2	2	2	2
AX-147232337	Aradu.A09	3427133	Aradu.A09	3427133	A09	28.317	A09_3427133_Sten	-	1	1	2	2	2	2	2	2	2	2	2	2	2	2	2	2	3	2	2	2	2	2	2	-	2	2	2	3	2	2	2	2	2	2	2	2	2	2	2	2	2
AX-147223242	Aradu.A05	92835506	Aradu.A05	92835506	A09	43.731	A05_92835506_Sten	Designed, not ordered	1	1	2	2	2	2	2	2	2	2	2	2	2	2	2	2	2	2	2	2	2	2	2	2	2	2	2	2	2	2	2	2	2	2	2	2	2	2	2	2	2
AX-147232596	Aradu.A09	7750844	Aradu.A09	7750844	A09	44.4	A09_7750844_Sten	-	1	1	2	2	2	2	2	2	2	2	2	2	2	2	2	2	2	2	2	2	2	2	2	2	2	2	2	2	2	2	2	2	2	2	2	2	2	2	2	2	2
AX-147232700	Aradu.A09	9827232	Aradu.A09	9827232	A09	44.735	A09_9827232_Sten	-	1	1	2	2	2	2	2	2	2	2	2	2	2	2	2	3	2	3	3	1	3	2	2	2	2	2	2	2	2	2	2	2	2	2	2	2	2	2	2	2	2
AX-147232740	Aradu.A09	10442851	Aradu.A09	10442851	A09	47.285	A09_10442851_Sten	-	1	1	2	2	2	2	2	2	2	2	2	2	2	2	2	2	2	2	2	2	2	2	2	2	2	2	2	2	2	2	2	2	2	-	2	2	2	2	2	2	2
AX-147232832	Aradu.A09	13120048	Aradu.A09	13120048	A09	64.991	A09_13120048_Sten	-	1	1	2	2	2	2	2	2	2	2	2	2	2	2	2	2	2	2	2	2	2	2	2	2	2	2	2	2	2	2	2	2	2	2	2	2	2	2	2	2	2
AX-147232906	Aradu.A09	14385410	Aradu.A09	14385410	A09	80.381	A09_14385410_Sten	Designed, not ordered	1	1	2	2	2	2	2	2	2	2	2	2	2	2	2	2	2	2	2	2	2	2	2	2	2	2	2	2	2	2	2	2	2	2	2	2	2	2	2	2	2
AX-147232927	Aradu.A09	15225814	Aradu.A09	15225814	A09	81.73	A09_15225814_Sten	-	1	1	2	2	2	2	2	2	2	2	2	2	2	2	2	2	2	2	2	2	2	2	2	2	2	2	2	2	2	2	2	2	2	2	2	2	2	2	2	2	2
AX-147232952	Aradu.A09	16472775	Aradu.A09	16472775	A09	82.837	A09_16472775_Sten	-	1	1	2	2	2	2	2	2	2	2	3	2	2	2	2	3	2	3	3	3	3	2	2	2	2	2	2	2	2	2	2	2	2	2	2	2	2	2	2	2	2
AX-147232981	Aradu.A09	17033486	Aradu.A09	17033486	A09	86.936	A09_17033486_Sten	-	1	1	2	2	2	2	2	2	2	2	2	2	2	2	2	2	2	2	2	2	2	2	2	2	2	2	2	2	2	2	2	2	2	2	2	2	2	2	2	2	2
AX-147232963	Aradu.A09	16516448	Aradu.A09	16516448	A09	88.075	A09_16516448_Sten	Designed, ordered & Used (TableS2)	1	1	2	2	2	2	2	2	2	2	2	2	2	2	2	2	2	2	2	2	2	2	2	2	2	2	2	2	2	2	2	2	2	2	2	2	2	2	2	2	2
AX-147233060	Aradu.A09	19793596	Aradu.A09	19793596	A09	89.556	A09_19793596_Sten	-	1	1	2	2	2	2	2	2	2	2	3	2	2	2	2	3	2	3	3	3	3	2	2	2	2	2	2	2	2	2	2	2	2	2	2	2	2	2	2	2	2
AX-147233083	Aradu.A09	20493842	Aradu.A09	20493842	A09	90.426	A09_20493842_Sten	-	1	1	2	2	2	2	2	2	2	2	3	2	2	2	2	3	2	3	3	3	3	2	2	2	2	2	2	2	2	2	2	2	2	2	2	2	2	2	2	2	2
AX-147233141	Aradu.A09	25028543	Aradu.A09	25028543	A09	91.86	A09_25028543_Sten	Designed, not ordered	1	1	2	2	2	2	2	2	2	2	2	2	2	2	2	2	2	2	2	2	2	2	2	2	2	2	2	2	2	2	2	2	2	2	2	2	2	2	2	2	2
AX-147233233	Aradu.A09	30827063	Aradu.A09	30827063	A09	93.277	A09_30827063_Sten	-	1	1	2	2	2	2	2	2	2	2	2	2	2	2	2	2	2	2	2	2	2	2	2	2	2	2	2	2	2	2	2	2	2	2	2	2	2	2	2	2	2
AX-147233238	Aradu.A09	31075302	Aradu.A09	31075302	A09	93.277	A09_31075302_Sten	-	1	1	2	2	2	2	2	2	2	2	2	2	2	2	2	2	2	2	2	2	2	2	2	2	2	2	2	2	2	2	2	2	2	-	2	2	2	2	2	2	2
AX-147233235	Aradu.A09	30830430	Aradu.A09	30830430	A09	93.533	A09_30830430_Sten	Designed, not ordered	1	1	2	2	2	2	2	2	2	2	2	2	2	2	2	2	2	2	2	2	2	2	2	2	-	2	2	2	2	2	2	2	2	1	2	2	2	2	2	2	2
AX-147233523	Aradu.A09	79391871	Aradu.A09	79391871	A09	121.845	A09_79391871_Sten	-	1	1	2	2	2	2	2	2	2	2	2	2	2	2	2	2	2	2	2	2	2	2	2	2	2	2	2	2	2	2	2	2	2	2	2	2	2	2	2	2	2
AX-147233267	Aradu.A09	35915325	Aradu.A09	35915325	A09	122.413	A09_35915325_Sten	-	1	1	2	2	2	2	2	2	2	2	2	2	2	2	2	2	2	2	2	2	2	2	2	2	2	2	2	2	2	2	2	2	2	2	2	2	2	2	2	2	2
AX-147233557	Aradu.A09	83181734	Aradu.A09	83181734	A09	124.94	A09_83181734_Sten	Designed, not ordered	1	1	2	2	2	2	2	2	2	2	2	2	2	2	2	2	2	2	2	2	2	2	2	2	2	2	2	2	2	2	2	2	2	2	2	2	2	-	2	2	2
AX-147233670	Aradu.A09	94328792	Aradu.A09	94328792	A09	130.837	A09_94328792_Sten	-	1	1	2	2	2	2	2	2	2	2	2	2	2	2	2	2	2	2	2	2	2	2	2	2	2	2	2	2	2	2	2	2	2	2	2	2	2	2	2	2	2
AX-147233882	Aradu.A09	104646292	Aradu.A09	104646292	A09	133.221	A09_104646292_Sten	-	1	1	2	2	2	2	2	2	2	2	2	2	2	2	2	2	2	2	2	2	2	2	2	2	2	2	2	2	2	2	2	2	2	2	2	2	2	2	2	2	2
AX-147233992	Aradu.A09	109699138	Aradu.A09	109699138	A09	135.279	A09_109699138_Sten	-	1	1	2	2	2	2	2	2	2	2	2	2	2	2	2	2	2	2	2	-	2	2	2	2	2	2	2	2	2	2	2	2	2	2	2	2	2	2	2	2	2
AX-147234195	Aradu.A09	112245541	Aradu.A09	112245541	A09	146.506	A09_112245541_Sten	Designed, ordered & Used (TableS2)	1	1	2	2	2	2	2	3	2	2	3	3	2	2	2	3	2	3	3	3	3	2	2	2	2	2	2	2	2	2	2	2	2	2	2	2	2	2	2	3	2
AX-147234200	Aradu.A09	112309231	Aradu.A09	112309231	A09	152.441	A09_112309231_Sten	Designed, ordered & Used (TableS2)	1	1	2	2	2	2	2	3	2	2	1	1	2	2	2	3	2	3	3	3	3	2	2	2	2	2	2	-	2	2	2	2	2	2	2	2	2	2	2	3	2
AX-147234221	Aradu.A09	112542186	Aradu.A09	112542186	A09	163.904	A09_112542186_Sten	-	1	1	2	2	2	2	2	2	2	2	2	2	2	2	2	2	2	2	2	2	2	2	2	2	2	2	2	2	2	2	2	2	2	-	2	2	2	2	2	1	2
AX-147234232	Aradu.A09	112601285	Aradu.A09	112601285	A09	164.172	A09_112601285_Sten	-	1	1	2	2	2	2	2	2	2	2	1	1	2	2	2	3	2	3	3	3	3	2	2	2	2	2	2	2	2	2	2	2	2	2	2	2	2	2	2	3	2
AX-147234310	Aradu.A09	113470052	Aradu.A09	113470052	A09	168.12	A09_113470052_Sten	-	1	1	2	2	2	2	2	2	2	2	2	2	2	2	2	2	2	2	2	2	2	2	2	2	2	2	2	2	2	2	2	2	2	2	2	2	2	2	2	3	2
AX-147234334	Aradu.A09	113662975	Aradu.A09	113662975	A09	171.636	A09_113662975_Sten	-	1	1	2	2	2	2	2	2	2	2	2	2	2	2	2	2	2	2	2	2	2	2	2	2	2	2	2	2	2	2	2	2	2	2	2	2	2	2	2	3	2
AX-147234385	Aradu.A09	114515959	Aradu.A09	114515959	A09	178.361	A09_114515959_Sten	Designed, ordered & Used (TableS2)	1	1	2	2	2	2	2	2	2	2	2	2	2	2	2	2	2	2	2	2	2	2	2	2	2	2	2	2	2	2	2	2	2	2	2	2	2	2	2	3	2
AX-147234393	Aradu.A09	114681560	Aradu.A09	114681560	A09	179.405	A09_114681560_Sten	-	1	1	2	2	2	2	2	2	2	2	2	2	2	2	2	2	2	2	2	2	2	2	2	2	2	2	2	2	2	2	2	2	2	2	2	2	2	2	2	3	2
AX-147234525	Aradu.A09	115832113	Aradu.A09	115832113	A09	184.488	A09_115832113_Sten	-	1	1	2	2	2	2	2	2	2	2	2	2	2	2	2	2	2	2	2	2	2	2	2	2	2	2	2	2	2	2	2	2	2	2	2	2	2	2	2	3	2
AX-147234599	Aradu.A09	116627090	Aradu.A09	116627090	A09	192.487	A09_116627090_Sten	-	1	1	2	2	2	2	2	2	2	2	2	2	2	2	2	2	2	2	2	2	2	2	2	2	2	2	2	2	2	2	2	2	2	2	2	2	2	2	2	1	2
AX-147234740	Aradu.A09	118577665	Aradu.A09	118577665	A09	212.961	A09_118577665_Sten	-	1	1	2	2	2	2	2	2	2	2	2	2	2	2	2	2	2	2	2	2	2	2	2	2	2	2	3	2	2	2	2	2	2	2	2	2	2	2	2	3	2
AX-147235165	Aradu.A10	4293421	Aradu.A10	4293421	A10	3.983	A10_4293421_Sten	-	1	1	2	2	2	2	2	2	2	2	2	2	2	2	2	2	2	2	2	2	2	2	2	2	2	2	2	2	2	2	2	2	2	2	2	2	2	2	1	2	2
AX-147235204	Aradu.A10	4951877	Aradu.A10	4951877	A10	6.717	A10_4951877_Sten	-	1	1	2	2	2	2	2	2	2	2	2	2	2	2	2	2	2	2	2	2	2	2	2	2	2	2	2	2	2	2	2	2	2	2	2	2	2	2	1	2	2
AX-147235274	Aradu.A10	5845928	Aradu.A10	5845928	A10	9.951	A10_5845928_Sten	-	1	1	2	2	2	2	2	2	2	2	2	2	2	2	2	2	2	2	2	2	2	2	2	2	2	2	2	2	2	2	2	2	2	2	2	2	2	2	1	2	2
AX-147235299	Aradu.A10	6103331	Aradu.A10	6103331	A10	11.015	A10_6103331_Sten	-	1	1	2	2	2	2	2	2	1	2	2	2	2	2	2	2	2	2	2	2	2	2	2	2	2	2	2	2	2	2	2	2	2	2	2	2	2	2	1	2	2
AX-147235364	Aradu.A10	6784617	Aradu.A10	6784617	A10	13.195	A10_6784617_Sten	-	1	1	2	2	2	2	2	2	2	2	2	2	2	2	2	2	2	2	2	2	2	2	2	2	2	2	2	2	2	2	2	2	2	-	2	2	2	2	1	2	2
AX-147235363	Aradu.A10	6782100	Aradu.A10	6782100	A10	19.054	A10_6782100_Sten	-	1	1	2	2	2	2	2	2	2	2	2	2	2	2	2	2	2	2	2	2	2	2	2	2	2	2	2	2	2	2	2	2	2	2	2	2	2	2	3	2	2
AX-147235513	Aradu.A10	10641881	Aradu.A10	10641881	A10	33.799	A10_10641881_Sten	-	1	1	2	2	2	2	2	2	2	2	2	2	2	2	2	2	2	2	2	2	2	2	2	2	1	2	2	2	2	2	2	2	2	1	2	2	2	2	1	2	2
AX-147235551	Aradu.A10	12170279	Aradu.A10	12170279	A10	35.403	A10_12170279_Sten	-	1	1	2	2	2	2	2	2	2	2	2	2	2	2	2	2	2	2	2	2	2	2	2	2	1	2	2	2	2	2	2	2	2	1	2	2	2	2	1	2	2
AX-147235833	Aradu.A10	34514348	Aradu.A10	34514348	A10	47.725	A10_34514348_Sten	-	1	1	2	2	2	2	2	2	2	2	2	2	2	2	2	2	2	2	2	2	2	2	2	2	1	2	2	2	2	2	2	2	2	1	2	2	2	2	1	2	2
AX-147236198	Aradu.A10	83313579	Aradu.A10	83313579	A10	52.911	A10_83313579_Sten	-	1	1	2	2	2	2	2	2	2	2	2	2	2	2	2	2	2	2	2	2	2	2	2	2	2	2	2	2	2	2	2	2	2	2	2	2	2	2	2	2	2
AX-147236225	Aradu.A10	84240906	Aradu.A10	84240906	A10	53.528	A10_84240906_Sten	-	1	1	2	2	2	2	2	2	2	2	2	2	2	2	2	2	2	2	2	2	2	2	2	2	2	2	2	2	2	2	2	2	2	2	2	2	2	2	2	2	2
AX-147236291	Aradu.A10	88475620	Aradu.A10	88475620	A10	55.304	A10_88475620_Sten	-	1	1	2	2	2	2	2	2	2	2	2	2	2	2	2	2	2	2	2	2	2	2	2	2	2	2	2	2	2	2	2	2	2	2	2	2	2	2	2	2	2
AX-147236270	Aradu.A10	87705205	Aradu.A10	87705205	A10	55.957	A10_87705205_Sten	-	1	1	2	2	2	2	2	2	2	2	2	2	2	2	2	2	2	2	2	2	2	2	2	2	2	2	2	2	2	2	2	2	2	2	2	2	2	2	2	2	2
AX-147236380	Aradu.A10	92558727	Aradu.A10	92558727	A10	57.712	A10_92558727_Sten	-	1	1	2	2	2	2	2	2	2	2	2	2	2	2	2	2	2	2	2	2	2	2	2	2	2	2	2	2	2	2	2	2	2	2	2	2	2	2	2	2	2
AX-147236541	Aradu.A10	98540142	Aradu.A10	98540142	A10	63.576	A10_98540142_Sten	-	1	1	2	2	2	2	2	2	2	2	2	2	2	2	2	2	2	2	2	2	2	2	2	2	2	2	2	2	2	2	2	2	2	2	2	2	2	2	2	2	2
AX-147236571	Aradu.A10	99172713	Aradu.A10	99172713	A10	64.945	A10_99172713_Sten	-	1	1	2	2	2	2	2	2	2	2	2	2	2	2	2	2	2	2	2	2	2	2	2	2	2	2	2	2	2	2	2	2	2	2	2	2	2	2	2	2	2
AX-147236627	Aradu.A10	100516425	Aradu.A10	100516425	A10	66.699	A10_100516425_Sten	-	1	1	2	2	2	2	2	2	2	2	2	2	2	2	2	2	2	2	2	2	2	2	2	2	2	2	2	2	2	2	2	2	2	2	2	2	2	2	2	2	2
AX-147236642	Aradu.A10	100698734	Aradu.A10	100698734	A10	69.663	A10_100698734_Sten	-	1	1	2	2	2	2	2	2	2	2	2	2	2	2	2	2	2	2	2	2	2	2	2	2	2	2	2	2	2	2	2	2	2	2	2	2	2	2	2	2	2
AX-147236821	Aradu.A10	104138451	Aradu.A10	104138451	A10	83.71	A10_104138451_Sten	-	1	1	2	2	2	2	2	2	2	2	2	2	2	2	2	2	2	2	2	2	2	2	2	2	2	2	2	2	2	2	2	2	2	2	2	2	2	2	2	2	2
AX-147236829	Aradu.A10	104321878	Aradu.A10	104321878	A10	85.341	A10_104321878_Sten	-	1	1	2	2	2	2	2	2	2	2	2	2	2	2	2	2	2	2	2	2	2	2	2	2	2	2	2	2	2	2	2	2	2	2	2	2	2	2	2	2	2
AX-147236836	Aradu.A10	104350153	Aradu.A10	104350153	A10	86.056	A10_104350153_Sten	-	1	1	2	2	2	2	2	2	2	2	2	2	2	2	2	2	2	2	2	2	2	2	2	2	2	2	2	2	2	2	2	2	2	2	2	2	2	2	2	2	2
AX-147236852	Aradu.A10	104660224	Aradu.A10	104660224	A10	87.215	A10_104660224_Sten	-	1	1	2	2	2	2	2	2	2	2	2	2	2	2	2	2	2	2	2	2	2	2	2	2	2	2	2	2	2	2	2	2	2	2	2	2	2	2	2	2	2
AX-147236916	Aradu.A10	105362018	Aradu.A10	105362018	A10	91.764	A10_105362018_Sten	-	1	1	2	2	2	2	2	2	2	2	2	2	2	2	2	2	2	2	2	2	2	2	2	2	2	2	2	2	2	2	2	2	2	2	2	2	2	2	2	2	2
AX-147236928	Aradu.A10	105535554	Aradu.A10	105535554	A10	95.082	A10_105535554_Sten	-	1	1	2	2	2	2	2	2	2	2	2	2	2	2	2	2	2	2	2	2	2	2	2	2	2	2	2	2	2	2	2	2	2	2	2	2	2	2	2	2	2
AX-147236910	Aradu.A10	105330547	Aradu.A10	105330547	A10	100.97	A10_105330547_Sten	-	1	1	2	2	2	2	2	2	2	2	2	2	2	2	2	2	2	2	2	2	2	2	2	2	2	2	2	2	2	2	2	2	2	2	2	2	2	2	2	2	2
AX-147237012	Aradu.A10	106407069	Aradu.A10	106407069	A10	108.684	A10_106407069_Sten	-	1	1	2	2	2	2	2	2	2	2	2	2	2	2	2	2	2	2	2	2	2	2	2	2	2	2	2	2	2	2	2	2	2	2	2	2	2	2	2	2	2
AX-147237116	Aradu.A10	107338680	Aradu.A10	107338680	A10	119.872	A10_107338680_Sten	-	1	1	2	2	2	2	2	2	2	2	2	2	2	2	2	2	2	2	2	2	2	2	2	2	2	2	2	2	2	2	2	2	2	2	2	2	2	2	2	2	2
AX-147237141	Aradu.A10	107485112	Aradu.A10	107485112	A10	123.739	A10_107485112_Sten	-	1	1	2	2	2	2	2	2	2	2	2	2	2	2	2	2	2	2	2	2	2	2	2	2	2	2	2	2	2	2	2	2	2	2	2	2	2	2	2	2	2
AX-147237165	Aradu.A10	107670856	Aradu.A10	107670856	A10	125.61	A10_107670856_Sten	-	1	1	2	2	2	2	2	2	2	2	2	2	2	2	2	2	2	2	2	2	2	2	2	2	2	2	2	2	2	2	2	2	2	2	2	2	2	2	2	2	2
AX-147237211	Aradu.A10	107915486	Aradu.A10	107915486	A10	132.057	A10_107915486_Sten	-	1	1	2	2	2	2	2	2	2	2	2	2	2	2	2	2	2	2	2	2	2	2	2	2	2	2	2	2	2	2	2	2	2	2	2	2	2	2	2	2	2
AX-147237210	Aradu.A10	107885754	Aradu.A10	107885754	A10	136.301	A10_107885754_Sten	-	1	1	2	2	2	2	2	2	2	2	2	2	2	2	2	2	2	2	2	2	2	2	2	2	2	2	2	2	2	2	2	2	2	2	2	2	2	2	2	2	2
AX-147237245	Aradu.A10	108153415	Aradu.A10	108153415	A10	139.277	A10_108153415_Sten	-	1	1	2	2	2	2	2	2	2	2	2	2	2	2	2	2	2	2	2	2	2	2	2	2	2	2	2	2	2	2	2	2	2	2	2	2	2	2	2	2	2
AX-147237298	Aradu.A10	108838533	Aradu.A10	108838533	A10	143.449	A10_108838533_Sten	-	1	1	2	2	2	2	2	2	2	2	2	2	2	2	2	2	2	2	2	2	2	2	2	2	2	2	2	2	2	2	2	2	2	2	2	2	2	2	2	2	2
AX-147237303	Aradu.A10	108861274	Aradu.A10	108861274	A10	143.991	A10_108861274_Sten	-	1	1	2	2	2	2	2	2	2	2	2	2	2	2	2	2	2	2	2	2	2	2	2	2	2	2	2	2	2	2	2	2	2	2	2	2	2	2	2	2	2
AX-147262806	Araip.B10	482556	Araip.B10	482556	B01	0	B10_482556_Bat	-	1	1	2	2	2	2	2	2	2	2	2	2	2	2	2	2	2	2	2	2	2	2	2	2	2	2	2	2	2	2	2	2	2	2	2	2	2	3	2	2	2
AX-147262784	Araip.B10	289704	Araip.B10	289704	B01	9.564	B10_289704_Bat	-	1	1	2	2	2	2	2	2	2	2	2	2	2	2	2	2	2	2	2	2	2	2	2	2	2	2	2	2	2	2	2	2	2	2	2	2	2	1	2	2	2
AX-147237531	Araip.B01	1456707	Araip.B01	1456707	B01	16.235	B01_1456707_Bat	-	1	1	2	2	2	2	2	2	2	2	2	2	2	2	2	2	2	2	2	2	2	2	2	2	2	2	2	2	2	2	2	2	2	2	2	2	2	3	2	2	2
AX-147237499	Araip.B01	1242964	Araip.B01	1242964	B01	16.795	B01_1242964_Bat	-	1	1	2	2	3	2	2	2	2	2	2	2	2	2	2	2	2	2	2	2	2	2	2	2	2	2	2	2	2	2	2	2	2	-	2	2	2	3	2	2	2
AX-147209912	Aradu.A01	11121418	Araip.B01	673594	B01	18.746	B01_673594_Bat	-	1	1	2	2	2	2	2	2	2	2	2	2	2	2	2	2	2	2	2	2	2	2	2	2	2	2	2	2	2	2	2	2	2	2	2	2	2	1	2	2	2
AX-147209918	Aradu.A01	11183612	Araip.B01	637604	B01	21.753	B01_637604_Bat	-	1	1	2	2	2	2	2	2	2	2	2	2	2	2	2	2	2	2	2	2	2	2	2	2	2	2	2	2	2	2	2	2	2	2	2	2	2	3	2	2	2
AX-147209994	Aradu.A01	11756006	Araip.B01	259246	B01	25.909	B01_259246_Bat	-	1	1	2	2	2	2	2	2	2	2	2	2	2	2	2	2	2	2	2	2	2	2	2	2	2	2	2	2	2	2	2	2	2	2	2	2	2	3	2	2	2
AX-147209161	Aradu.A01	7802538	Araip.B01	2325984	B01	30.391	B01_2325984_Bat	-	1	1	2	2	2	2	2	2	2	2	2	2	2	2	2	2	2	2	2	2	2	2	2	2	2	2	2	2	2	2	2	2	2	2	2	2	2	1	2	2	2
AX-147237610	Araip.B01	2453789	Araip.B01	2453789	B01	31.35	B01_2453789_Bat	-	1	1	2	2	2	2	2	2	2	2	2	2	2	2	2	2	2	2	2	2	2	2	2	2	2	2	2	2	2	2	2	2	2	2	2	2	2	1	2	2	2
AX-147237628	Araip.B01	2808780	Araip.B01	2808780	B01	32.25	B01_2808780_Bat	-	1	1	2	2	2	2	2	2	2	2	2	2	2	2	2	2	2	2	2	2	2	2	2	2	2	2	2	2	2	2	2	2	2	2	2	2	2	3	2	2	2
AX-147209041	Aradu.A01	6933639	Araip.B01	3182980	B01	37.315	B01_3182980_Bat	-	1	1	2	2	2	2	2	2	2	2	2	2	2	2	2	2	2	2	2	2	2	2	2	2	2	2	2	2	2	2	2	2	2	3	2	2	2	3	2	2	2
AX-147208994	Aradu.A01	6714083	Araip.B01	3439059	B01	38.781	B01_3439059_Bat	-	1	1	2	2	2	2	2	2	2	2	2	2	2	2	2	2	2	2	2	2	2	2	2	2	2	2	2	2	2	2	2	2	2	2	2	2	2	3	2	2	2
AX-147237689	Araip.B01	3853031	Araip.B01	3853031	B01	40.081	B01_3853031_Bat	-	1	1	2	2	2	2	2	2	2	2	2	2	2	2	2	2	2	2	2	2	2	2	2	2	2	2	2	2	2	2	2	2	2	2	2	2	2	3	2	2	2
AX-147237688	Araip.B01	3850724	Araip.B01	3850724	B01	40.083	B01_3850724_Bat	-	1	1	2	2	2	2	2	2	2	2	2	2	2	2	2	2	2	2	2	2	2	2	2	2	2	2	2	2	2	2	2	2	2	2	2	2	2	3	2	2	2
AX-147237708	Araip.B01	4229707	Araip.B01	4229707	B01	41.504	B01_4229707_Bat	-	1	1	2	2	2	2	2	2	2	2	2	2	2	2	2	2	2	2	2	2	2	2	2	2	2	2	2	2	2	2	2	2	2	2	2	2	2	2	2	2	2
AX-147208810	Aradu.A01	5598002	Araip.B01	4817802	B01	43.842	B01_4817802_Bat	-	1	1	2	2	2	2	2	2	2	2	2	2	2	2	2	2	2	2	2	2	2	2	2	2	2	2	2	2	2	2	2	2	2	2	2	2	2	2	2	2	2
AX-147208775	Aradu.A01	5459030	Araip.B01	4992265	B01	45.437	B01_4992265_Bat	-	1	1	2	2	2	2	2	2	2	2	2	2	2	2	2	2	2	2	2	2	2	2	2	2	2	2	2	2	2	2	2	2	2	2	2	2	2	2	2	2	2
AX-147208504	Aradu.A01	4050068	Araip.B01	7171289	B01	51.587	B01_7171289_Bat	-	1	1	2	2	2	2	2	2	2	2	2	2	2	2	2	2	2	2	2	2	2	2	2	2	2	2	2	2	2	2	2	2	2	2	2	2	2	2	2	2	2
AX-147237900	Araip.B01	8117561	Araip.B01	8117561	B01	53.348	B01_8117561_Bat	-	1	1	2	2	2	2	2	2	2	2	2	2	2	2	2	2	2	2	2	2	2	2	2	2	2	2	2	2	2	2	2	2	2	2	2	2	2	2	2	2	2
AX-147237897	Araip.B01	8053505	Araip.B01	8053505	B01	54.8	B01_8053505_Bat	-	1	1	2	2	2	2	2	2	2	2	2	2	2	2	2	2	2	2	2	2	2	2	2	2	2	2	2	2	2	2	2	2	2	2	2	2	2	2	2	2	2
AX-147237927	Araip.B01	9319416	Araip.B01	9319416	B01	59.889	B01_9319416_Bat	-	1	1	2	2	2	2	2	2	2	2	2	2	2	2	2	2	2	2	2	2	2	2	2	2	2	2	2	2	2	2	2	2	2	2	2	2	2	2	2	2	2
AX-147237943	Araip.B01	9657890	Araip.B01	9657890	B01	62.576	B01_9657890_Bat	-	1	1	2	2	2	2	2	2	2	2	2	2	2	2	2	2	2	2	2	2	2	2	2	2	2	2	2	2	2	2	2	2	2	2	2	2	2	2	2	2	2
AX-147237957	Araip.B01	10280566	Araip.B01	10280566	B01	63.238	B01_10280566_Bat	-	1	1	2	2	2	2	2	2	2	2	2	2	2	2	2	2	2	2	2	2	2	2	2	2	2	2	2	2	2	2	2	2	2	2	2	2	2	2	2	2	2
AX-147238003	Araip.B01	11619714	Araip.B01	11619714	B01	64.591	B01_11619714_Bat	-	1	1	2	2	2	2	2	2	2	2	2	2	2	2	2	2	2	2	2	2	2	2	2	2	2	2	2	2	2	2	2	2	2	2	2	2	2	2	2	2	2
AX-147238059	Araip.B01	13141248	Araip.B01	13141248	B01	68.774	B01_13141248_Bat	-	1	1	2	2	2	2	2	2	2	2	2	2	2	2	2	2	2	2	2	2	2	2	2	2	2	2	2	2	2	2	2	2	2	2	2	2	2	2	2	2	2
AX-147238154	Araip.B01	16883698	Araip.B01	16883698	B01	79.541	B01_16883698_Bat	-	1	1	2	2	2	2	2	2	2	2	2	2	2	2	2	2	2	2	2	2	2	2	2	2	2	2	2	2	2	2	2	2	2	2	2	2	2	2	2	2	2
AX-147238184	Araip.B01	17903230	Araip.B01	17903230	B01	80.313	B01_17903230_Bat	-	1	1	2	2	2	2	2	2	2	2	2	2	2	2	2	2	2	2	2	2	2	2	2	2	2	2	2	2	2	2	2	2	2	2	2	2	2	2	2	2	2
AX-147238182	Araip.B01	17877473	Araip.B01	17877473	B01	81.219	B01_17877473_Bat	-	1	1	2	2	2	2	2	2	2	2	2	2	2	2	2	2	2	2	2	2	2	2	2	2	2	2	2	2	2	2	2	2	2	2	2	2	2	2	2	2	2
AX-147210268	Aradu.A01	16516550	Araip.B01	22133745	B01	82.696	B01_22133745_Bat	-	1	1	2	2	2	2	2	2	2	2	2	2	2	2	2	2	2	2	2	2	2	2	2	2	2	2	2	2	2	2	2	2	2	2	2	2	2	2	2	2	2
AX-147238408	Araip.B01	40165748	Araip.B01	40165748	B01	83.729	B01_40165748_Bat	-	1	1	2	2	2	2	2	-	2	2	2	2	2	2	2	2	2	2	2	2	2	2	2	2	2	2	2	2	2	2	2	2	2	-	2	2	2	2	2	2	2
AX-147238573	Araip.B01	66268396	Araip.B01	66268396	B01	84.775	B01_66268396_Bat	-	1	1	2	2	2	2	2	2	2	2	2	2	2	2	2	2	2	2	2	2	2	2	2	2	2	2	2	2	2	2	2	2	2	2	2	2	2	2	2	2	2
AX-147238498	Araip.B01	50849117	Araip.B01	50849117	B01	85.068	B01_50849117_Bat	-	1	1	2	2	2	2	2	2	2	2	2	2	2	2	2	2	2	2	2	2	2	2	2	2	2	2	2	2	2	2	2	2	2	2	2	2	2	2	2	2	2
AX-147238650	Araip.B01	94991606	Araip.B01	94991606	B01	88.346	B01_94991606_Bat	-	1	1	2	2	2	2	2	-	2	2	2	2	2	2	2	2	2	2	2	2	2	2	2	2	2	2	2	2	2	2	2	2	2	2	2	2	2	2	2	2	2
AX-147238414	Araip.B01	40723567	Araip.B01	40723567	B01	93.907	B01_40723567_Bat	-	1	1	2	2	2	2	2	2	2	2	2	2	2	2	2	2	2	2	2	2	2	2	2	2	2	2	2	2	2	2	2	2	2	2	2	2	2	2	2	2	2
AX-147238361	Araip.B01	34693121	Araip.B01	34693121	B01	94.54	B01_34693121_Bat	-	1	1	2	2	2	2	2	-	2	-	2	2	2	2	2	2	2	2	2	2	2	2	2	2	2	2	2	2	2	2	2	2	2	2	2	2	2	2	2	2	2
AX-147238472	Araip.B01	45958898	Araip.B01	45958898	B01	95.204	B01_45958898_Bat	-	1	1	2	2	2	2	2	2	2	2	2	2	2	2	2	2	2	2	2	2	2	2	2	2	2	2	2	2	2	2	2	2	2	2	2	2	2	2	2	2	2
AX-147238594	Araip.B01	72191807	Araip.B01	72191807	B01	98.042	B01_72191807_Bat	-	1	1	2	2	2	2	2	2	2	2	2	2	2	2	2	2	2	2	2	2	2	2	2	2	2	2	2	2	2	2	-	2	2	2	2	2	2	2	2	2	2
AX-147238146	Araip.B01	16703027	Araip.B01	16703027	B01	108.165	B01_16703027_Bat	-	1	1	2	2	2	2	2	2	2	2	2	2	2	2	2	2	2	2	2	2	2	2	2	2	2	2	2	2	2	2	2	2	2	2	2	2	2	2	2	2	2
AX-147239221	Araip.B01	129111959	Araip.B01	129111959	B01	119.541	B01_129111959_Bat	-	1	1	2	2	2	2	2	2	2	2	2	2	2	2	2	2	2	2	2	2	2	2	2	2	2	2	2	2	2	2	2	2	2	3	2	2	2	2	2	2	2
AX-147238921	Araip.B01	121349467	Araip.B01	121349467	B01	137.302	B01_121349467_Bat	-	1	1	2	2	2	2	2	2	2	2	2	2	2	2	2	2	2	2	2	2	2	2	2	2	2	2	2	2	2	2	2	2	2	2	2	2	2	2	2	2	2
AX-147238901	Araip.B01	120201499	Araip.B01	120201499	B01	138.552	B01_120201499_Bat	-	1	1	2	2	-	-	2	-	2	2	2	2	2	2	2	2	2	2	2	2	2	2	-	2	2	2	2	2	2	2	2	-	2	2	2	2	2	2	2	2	2
AX-147239097	Araip.B01	126275267	Araip.B01	126275267	B01	142.941	B01_126275267_Bat	-	1	1	2	2	2	2	2	2	2	2	2	2	2	2	2	2	2	2	2	2	2	2	2	2	2	2	2	2	2	2	2	2	2	2	2	2	2	2	2	2	2
AX-147239096	Araip.B01	126275217	Araip.B01	126275217	B01	143.232	B01_126275217_Bat	-	1	1	2	2	2	2	2	2	2	2	2	2	2	2	2	2	2	2	2	2	2	2	2	2	2	2	2	2	2	2	2	2	2	2	2	2	2	2	2	2	2
AX-147239160	Araip.B01	127306329	Araip.B01	127306329	B01	143.743	B01_127306329_Bat	-	1	1	2	2	2	2	2	2	2	2	2	2	2	2	2	2	2	2	2	2	2	2	2	2	2	2	2	2	2	2	2	2	2	2	2	2	2	2	2	2	2
AX-147239234	Araip.B01	129346758	Araip.B01	129346758	B01	146.665	B01_129346758_Bat	-	1	1	2	2	2	2	2	2	2	2	2	2	2	2	2	2	2	2	2	2	2	2	2	2	2	2	2	2	2	2	2	2	2	2	2	2	2	2	2	2	2
AX-147239229	Araip.B01	129329429	Araip.B01	129329429	B01	147.488	B01_129329429_Bat	-	1	1	2	2	2	2	2	2	2	2	2	2	2	2	2	2	2	2	2	2	2	2	2	2	2	2	2	2	2	2	2	2	2	2	2	2	2	2	2	2	2
AX-147239260	Araip.B01	129586363	Araip.B01	129586363	B01	148.938	B01_129586363_Bat	-	1	1	2	2	2	2	2	2	2	2	2	2	2	2	2	2	2	2	2	2	2	2	2	2	2	2	2	2	2	2	2	2	2	2	2	2	2	2	2	2	2
AX-147239259	Araip.B01	129586068	Araip.B01	129586068	B01	148.951	B01_129586068_Bat	-	1	1	2	2	2	2	2	2	2	2	2	2	2	2	2	2	2	2	2	2	2	2	2	2	2	2	2	2	2	2	2	2	2	2	2	2	2	2	2	2	2
AX-147239322	Araip.B01	130935077	Araip.B01	130935077	B01	155.303	B01_130935077_Bat	-	1	1	2	2	2	2	2	2	2	2	2	2	2	2	2	2	2	2	2	2	2	2	2	2	2	2	2	2	2	2	2	2	2	2	2	2	2	2	2	2	2
AX-147239364	Araip.B01	131611913	Araip.B01	131611913	B01	156.96	B01_131611913_Bat	-	1	1	2	2	2	2	2	2	2	2	2	2	2	2	2	2	2	2	2	2	2	2	2	2	2	2	2	2	2	2	2	2	2	2	2	2	2	2	2	2	2
AX-147239403	Araip.B01	133360557	Araip.B01	133360557	B01	158.803	B01_133360557_Bat	-	1	1	2	2	2	2	2	2	2	2	2	2	2	2	2	2	2	2	2	2	2	2	2	2	2	2	2	2	2	2	2	2	2	2	2	2	2	2	2	2	2
AX-147239438	Araip.B01	134013035	Araip.B01	134013035	B01	165.535	B01_134013035_Bat	-	1	1	2	2	2	2	2	2	2	2	2	2	2	2	2	2	2	2	2	2	2	2	2	2	2	2	2	2	2	2	2	2	2	2	2	2	2	2	2	2	2
AX-147239515	Araip.B01	134770291	Araip.B01	134770291	B01	171.489	B01_134770291_Bat	-	1	1	2	2	2	2	2	2	2	2	2	2	2	3	3	2	2	2	2	2	2	2	2	3	2	2	2	2	3	2	2	3	2	2	2	3	2	3	2	2	3
AX-147239577	Araip.B01	135464853	Araip.B01	135464853	B01	179.368	B01_135464853_Bat	-	1	1	2	2	2	2	2	2	2	2	2	2	2	3	3	2	2	2	2	2	2	2	2	3	2	2	2	2	3	2	2	3	2	2	2	3	2	3	2	2	3
AX-147239589	Araip.B01	135696566	Araip.B01	135696566	B01	183.777	B01_135696566_Bat	-	1	1	2	2	2	2	2	2	2	2	2	2	2	2	3	2	2	2	2	2	2	2	3	3	2	2	2	2	3	2	2	3	2	2	2	3	2	3	2	2	3
AX-147239595	Araip.B01	135756765	Araip.B01	135756765	B01	185.091	B01_135756765_Bat	-	1	1	2	2	2	2	2	2	2	2	2	2	2	2	3	2	2	2	2	2	2	2	3	3	2	2	2	2	3	2	2	3	2	2	2	3	2	3	2	2	3
AX-147239631	Araip.B01	136286145	Araip.B01	136286145	B01	191.363	B01_136286145_Bat	-	1	1	2	2	2	2	2	2	2	2	2	2	2	2	3	2	2	2	2	2	2	2	3	3	2	2	2	2	3	2	2	3	2	2	2	3	2	3	2	2	3
AX-147239821	Araip.B02	432989	Araip.B02	432989	B02	2.881	B02_432989_Bat	-	1	1	2	2	2	2	2	2	2	2	2	2	2	2	2	2	2	2	2	2	2	2	2	1	2	2	2	2	2	2	2	2	2	2	2	2	2	2	2	2	2
AX-147239986	Araip.B02	1296859	Araip.B02	1296859	B02	7.424	B02_1296859_Bat	-	1	1	2	2	2	2	2	2	2	2	2	2	2	2	2	2	2	2	2	2	2	2	2	1	2	2	2	2	2	2	2	2	2	2	2	2	2	2	2	2	2
AX-147240274	Araip.B02	2288084	Araip.B02	2288084	B02	27.243	B02_2288084_Bat	-	1	1	2	2	2	2	2	2	2	2	2	2	2	2	2	2	2	2	2	2	2	2	2	1	2	2	2	2	2	2	2	2	2	2	2	2	2	2	2	2	2
AX-147212793	Aradu.A02	3089814	Araip.B02	2363097	B02	32.604	B02_2363097_Bat	-	1	1	2	2	2	2	2	2	2	2	2	2	2	2	2	2	2	2	2	2	2	2	2	3	2	2	2	2	2	2	2	2	2	2	2	2	2	2	2	2	2
AX-147240299	Araip.B02	2423971	Araip.B02	2423971	B02	35.398	B02_2423971_Bat	-	1	1	2	2	2	2	2	2	2	2	2	2	2	2	2	2	2	2	2	2	2	2	2	3	2	2	2	2	2	2	2	2	2	2	2	2	2	2	2	2	2
AX-147212897	Aradu.A02	4275846	Araip.B02	5452399	B02	48.002	B02_5452399_Bat	-	1	1	2	2	2	2	2	2	2	2	2	2	2	2	2	2	2	2	2	2	2	2	2	2	2	2	2	2	2	2	2	2	2	2	2	2	2	2	2	2	2
AX-147240646	Araip.B02	6797838	Araip.B02	6797838	B02	52.208	B02_6797838_Bat	-	1	1	2	2	2	2	2	2	2	2	2	2	2	2	2	2	2	2	2	2	2	2	2	2	2	2	2	2	2	2	2	2	2	2	2	2	2	2	2	2	2
AX-147240734	Araip.B02	8612660	Araip.B02	8612660	B02	58.317	B02_8612660_Bat	-	1	1	2	2	2	2	2	2	2	2	2	2	2	2	2	2	2	2	2	2	2	2	2	2	2	2	2	2	2	2	2	2	2	2	2	2	2	2	2	2	2
AX-147240917	Araip.B02	13624546	Araip.B02	13624546	B02	70.56	B02_13624546_Bat	-	1	1	2	2	2	2	2	2	2	2	2	2	2	2	2	2	2	2	2	2	2	2	2	2	2	2	2	2	2	2	2	2	2	2	2	2	2	2	2	2	2
AX-147241134	Araip.B02	23818799	Araip.B02	23818799	B02	80.616	B02_23818799_Bat	-	1	1	2	2	2	2	2	2	2	2	2	2	2	2	2	2	2	2	2	2	2	2	2	2	2	2	2	2	2	2	2	2	2	2	2	2	2	2	2	2	2
AX-147241114	Araip.B02	23173130	Araip.B02	23173130	B02	83.648	B02_23173130_Bat	-	1	1	2	2	2	2	2	2	2	2	2	2	2	2	2	2	2	2	2	2	2	2	2	2	2	2	2	2	2	2	2	2	2	2	2	2	2	2	2	2	2
AX-147213489	Aradu.A02	16287488	Aradu.A02•	16287488	B02	84.288	A02•_16287488_Bat	-	1	1	2	2	2	2	2	2	2	2	2	2	2	2	2	2	2	2	2	2	2	2	2	2	2	2	2	2	2	2	2	2	2	2	2	2	2	2	2	2	2
AX-147240979	Araip.B02	16257675	Araip.B02	16257675	B02	87.292	B02_16257675_Bat	-	1	1	2	2	2	2	2	2	2	2	2	2	2	2	2	2	2	2	2	2	2	2	2	2	2	2	2	2	2	2	2	2	2	2	2	2	2	2	2	2	2
AX-147241162	Araip.B02	26043108	Araip.B02	26043108	B02	94.008	B02_26043108_Bat	-	1	1	2	2	2	2	2	2	2	2	2	2	2	2	2	2	2	2	2	2	2	2	2	2	2	2	2	2	2	2	2	2	2	2	2	2	2	2	2	2	2
AX-147241278	Araip.B02	37246048	Araip.B02	37246048	B02	94.62	B02_37246048_Bat	-	1	1	2	2	2	2	2	2	2	2	2	2	2	2	2	2	2	2	2	2	2	2	2	2	2	2	2	2	2	2	2	2	2	2	2	2	2	2	2	2	2
AX-147241249	Araip.B02	34021648	Araip.B02	34021648	B02	96.768	B02_34021648_Bat	-	1	1	2	2	2	2	2	2	2	2	2	2	2	2	2	2	2	2	2	2	2	2	2	2	2	2	2	2	2	2	2	2	2	2	2	2	2	2	2	2	2
AX-147241558	Araip.B02	76871620	Araip.B02	76871620	B02	99.505	B02_76871620_Bat	-	1	1	2	2	2	2	2	2	2	2	2	2	2	2	2	2	2	2	2	2	2	2	2	2	2	2	2	2	2	2	2	2	2	2	2	2	2	2	2	2	2
AX-147241610	Araip.B02	79696490	Araip.B02	79696490	B02	99.514	B02_79696490_Bat	-	1	1	2	2	2	2	2	2	2	2	2	2	2	2	2	2	2	2	2	2	2	2	2	2	2	2	2	2	2	2	2	2	2	2	2	2	2	2	2	2	2
AX-147241380	Araip.B02	56926800	Araip.B02	56926800	B02	99.706	B02_56926800_Bat	-	1	1	2	2	2	2	2	2	2	2	2	2	2	2	2	2	2	2	2	2	2	2	2	2	2	2	2	2	2	2	2	2	2	2	2	2	2	2	2	2	2
AX-147241572	Araip.B02	77666718	Araip.B02	77666718	B02	99.784	B02_77666718_Bat	-	1	1	2	2	2	2	2	2	2	2	2	2	2	2	2	2	-	2	2	2	2	2	2	2	2	2	2	2	2	2	2	2	2	2	2	2	2	2	2	2	2
AX-147241519	Araip.B02	74232008	Araip.B02	74232008	B02	100.312	B02_74232008_Bat	-	1	1	2	2	2	2	2	2	2	2	2	2	2	2	2	2	2	2	2	2	2	2	2	2	2	2	2	2	2	2	2	2	2	2	2	2	2	2	2	2	2
AX-147241485	Araip.B02	70551064	Araip.B02	70551064	B02	104.989	B02_70551064_Bat	-	1	1	2	2	2	2	2	2	2	2	2	2	2	2	2	2	2	2	2	2	2	2	2	2	2	2	2	2	2	2	2	2	2	2	2	2	2	2	2	2	2
AX-147241731	Araip.B02	86140024	Araip.B02	86140024	B02	113.816	B02_86140024_Bat	-	1	1	2	2	2	2	2	2	2	2	2	2	2	2	2	2	2	2	2	2	2	2	2	2	2	2	2	2	2	2	2	2	2	2	2	2	2	2	2	2	2
AX-147241341	Araip.B02	52914231	Araip.B02	52914231	B02	114.811	B02_52914231_Bat	-	1	1	2	2	2	2	2	2	2	2	2	2	2	2	2	2	2	2	2	2	2	2	2	2	2	2	2	2	2	2	2	2	2	2	2	2	2	2	2	2	2
AX-147241356	Araip.B02	53978710	Araip.B02	53978710	B02	115.7	B02_53978710_Bat	-	1	1	2	2	2	2	2	2	2	2	2	2	2	2	2	2	2	2	2	2	2	2	2	2	2	2	2	2	2	2	2	2	2	2	2	2	2	2	2	2	2
AX-147241798	Araip.B02	88434777	Araip.B02	88434777	B02	116.102	B02_88434777_Bat	-	1	1	2	2	2	2	2	2	2	2	2	2	2	2	2	2	2	2	2	2	2	2	2	2	2	2	2	2	2	2	2	2	2	2	2	2	2	2	2	2	2
AX-147241937	Araip.B02	92694482	Araip.B02	92694482	B02	118.052	B02_92694482_Bat	-	1	1	2	2	2	2	2	2	2	2	2	2	2	2	2	2	2	2	2	2	2	2	2	2	2	2	2	2	2	2	2	2	2	2	2	2	2	2	2	2	2
AX-147241839	Araip.B02	90229347	Araip.B02	90229347	B02	119.615	B02_90229347_Bat	-	1	1	2	2	2	2	2	2	2	2	2	2	2	2	2	2	2	2	2	2	2	2	2	2	2	2	2	2	2	2	2	2	2	2	2	2	2	2	2	2	2
AX-147241969	Araip.B02	93074755	Araip.B02	93074755	B02	120.652	B02_93074755_Bat	-	1	1	2	2	2	2	2	2	2	2	2	2	2	2	2	2	2	2	2	2	2	2	2	2	2	2	2	2	2	2	2	2	2	2	2	2	2	2	2	2	2
AX-147214627	Aradu.A02	83089171	Araip.B02	94944202	B02	123.369	B02_94944202_Bat	-	1	1	2	2	2	2	2	2	2	2	2	2	2	2	2	2	2	2	2	2	2	2	2	2	2	2	2	2	2	2	2	2	2	2	2	2	2	2	2	2	2
AX-147242332	Araip.B02	100195323	Araip.B02	100195323	B02	133.95	B02_100195323_Bat	-	1	1	2	2	2	2	2	2	2	2	2	2	2	2	2	2	2	2	2	2	2	2	2	2	2	2	2	2	2	2	2	2	2	2	2	2	2	2	2	2	2
AX-147242386	Araip.B02	101071737	Araip.B02	101071737	B02	138.54	B02_101071737_Bat	-	1	1	2	2	2	2	2	2	2	2	2	2	2	2	2	2	2	2	2	2	2	2	2	2	2	2	2	2	2	2	2	2	2	2	2	2	2	2	2	2	2
AX-147242414	Araip.B02	101401524	Araip.B02	101401524	B02	140.222	B02_101401524_Bat	-	1	1	2	2	2	2	2	2	2	2	2	2	2	2	2	2	2	2	2	2	2	2	2	2	2	2	2	2	2	2	2	2	2	2	2	2	2	2	2	2	2
AX-147242558	Araip.B02	103778794	Araip.B02	103778794	B02	147.559	B02_103778794_Bat	-	1	1	2	2	2	2	2	2	2	2	2	2	2	2	2	2	2	2	2	2	2	2	2	2	2	2	2	2	2	2	2	2	2	2	2	2	2	2	2	2	2
AX-147242748	Araip.B02	105769903	Araip.B02	105769903	B02	156.682	B02_105769903_Bat	-	1	1	2	2	2	2	2	2	2	2	2	2	2	2	2	2	2	2	2	2	2	2	2	2	2	2	2	2	2	2	2	2	2	-	2	2	2	2	2	2	2
AX-147242773	Araip.B02	106067489	Araip.B02	106067489	B02	157.515	B02_106067489_Bat	-	1	1	2	2	2	2	2	2	2	2	2	2	2	2	2	2	2	2	2	2	2	2	2	2	2	2	2	2	2	2	2	2	2	2	2	2	2	2	2	2	2
AX-147242790	Araip.B02	106275015	Araip.B02	106275015	B02	159.561	B02_106275015_Bat	-	1	1	2	2	2	2	2	2	2	2	2	2	2	2	2	2	2	2	2	2	2	2	2	2	2	2	2	2	2	2	2	2	2	2	2	2	2	2	2	2	2
AX-147242824	Araip.B02	107417598	Araip.B02	107417598	B02	166.246	B02_107417598_Bat	-	1	1	2	2	2	2	2	2	2	2	2	2	2	2	2	2	2	2	2	2	2	2	2	2	2	2	2	2	2	2	2	2	2	2	2	2	2	2	2	2	2
AX-147242831	Araip.B02	107796347	Araip.B02	107796347	B02	167.501	B02_107796347_Bat	-	1	1	2	2	2	2	2	2	2	2	2	2	2	2	2	2	2	2	2	2	2	2	2	2	2	2	2	2	2	2	2	2	2	2	2	2	2	2	2	2	2
AX-147242839	Araip.B02	108109222	Araip.B02	108109222	B02	169.386	B02_108109222_Bat	-	1	1	2	2	2	2	2	2	2	2	2	2	2	2	2	2	2	2	2	2	2	2	2	2	2	2	2	2	2	2	2	2	2	2	2	2	2	2	2	2	2
AX-147215246	Aradu.A02	93448185	Araip.B02	108210101	B02	178.163	B02_108210101_Bat	-	1	1	2	2	2	2	2	2	2	2	2	2	2	2	2	2	2	2	2	2	2	2	2	2	2	2	2	2	2	2	2	2	2	2	2	2	2	2	2	2	2
AX-147243075	Araip.B03	2440813	Araip.B03	2440813	B03	0.861	B03_2440813_Bat	-	1	1	2	2	2	2	2	2	2	2	2	2	2	2	2	2	2	2	2	2	2	2	2	2	2	2	2	2	2	2	2	2	2	2	2	2	2	2	2	2	2
AX-147243191	Araip.B03	3923135	Araip.B03	3923135	B03	7.53	B03_3923135_Bat	-	1	1	2	2	2	2	2	2	2	2	2	2	2	2	2	2	2	2	2	2	2	2	2	2	2	2	2	2	2	2	3	2	2	-	2	3	2	2	2	2	3
AX-147243254	Araip.B03	4809737	Araip.B03	4809737	B03	11.343	B03_4809737_Bat	-	1	1	2	2	2	2	2	2	2	2	2	2	2	2	2	2	2	2	2	2	2	2	2	2	2	2	2	2	2	2	3	2	2	3	2	3	2	2	2	2	3
AX-147243278	Araip.B03	5066832	Araip.B03	5066832	B03	15.674	B03_5066832_Bat	-	1	1	2	2	2	2	2	2	2	2	2	2	2	2	2	2	2	2	2	2	2	2	2	2	2	2	2	2	2	2	3	2	2	2	2	3	2	2	2	2	3
AX-147243261	Araip.B03	4921393	Araip.B03	4921393	B03	18.538	B03_4921393_Bat	-	1	1	2	2	2	2	2	-	2	2	2	2	2	2	2	2	2	2	2	2	2	2	2	2	2	2	2	2	2	2	3	2	2	2	-	3	2	2	2	2	3
AX-147243447	Araip.B03	7616638	Araip.B03	7616638	B03	29.612	B03_7616638_Bat	-	1	1	2	2	2	2	2	2	2	2	2	2	2	2	2	2	2	2	2	2	2	2	2	-	2	2	2	2	2	2	3	2	2	2	2	3	2	2	2	2	3
AX-147243460	Araip.B03	7860735	Araip.B03	7860735	B03	32.06	B03_7860735_Bat	-	1	1	2	2	2	2	2	2	2	2	2	2	2	2	2	2	2	2	2	2	2	2	2	2	2	2	2	2	2	2	3	2	2	2	2	3	2	2	2	2	3
AX-147243563	Araip.B03	9999819	Araip.B03	9999819	B03	41.396	B03_9999819_Bat	-	1	1	2	2	2	2	2	2	2	2	2	2	2	2	2	2	2	2	2	2	2	2	2	2	2	2	2	2	2	2	3	2	2	2	2	3	2	2	2	2	3
AX-147255845	Araip.B07	70888950	Araip.B07	70888950	B03	45.778	B07_70888950_Bat	-	1	1	2	2	2	2	2	2	2	2	2	2	2	2	2	2	2	2	2	2	2	2	2	2	2	2	2	2	2	2	3	2	2	2	2	3	2	2	2	2	3
AX-147243670	Araip.B03	11855292	Araip.B03	11855292	B03	48.391	B03_11855292_Bat	-	1	1	2	2	2	2	2	2	2	2	2	2	2	2	2	2	2	2	2	2	2	2	2	2	2	2	2	2	2	2	3	2	2	2	2	3	2	2	2	2	3
AX-147243694	Araip.B03	12158942	Araip.B03	12158942	B03	49.167	B03_12158942_Bat	-	1	1	2	2	2	2	2	2	3	2	2	2	2	2	2	2	2	2	2	2	2	2	2	2	2	2	2	2	2	2	3	2	2	2	2	3	2	2	2	2	1
AX-147244183	Araip.B03	25572594	Araip.B03	25572594	B03	69.527	B03_25572594_Bat	-	1	1	2	2	2	2	2	2	2	2	2	2	2	2	2	2	2	2	2	2	2	2	2	2	2	2	2	2	2	2	2	2	2	2	2	2	2	2	2	2	2
AX-147244499	Araip.B03	39614080	Araip.B03	39614080	B03	94.867	B03_39614080_Bat	-	1	1	2	2	2	2	2	2	2	2	2	2	2	2	2	2	2	2	2	2	2	2	2	2	2	2	2	2	2	2	2	2	2	2	2	2	2	2	2	2	2
AX-147242920	Araip.B03	762928	Araip.B03	762928	B03	117.188	B03_762928_Bat	-	1	1	2	2	2	2	2	2	2	2	2	2	2	2	2	2	2	2	2	2	2	2	2	2	2	2	2	2	2	2	2	2	2	2	2	2	2	2	2	2	2
AX-147245054	Araip.B03	113447377	Araip.B03	113447377	B03	128.117	B03_113447377_Bat	-	1	1	2	2	2	2	2	2	2	2	2	2	2	2	2	2	2	2	2	2	2	2	2	2	2	2	2	2	2	2	2	2	2	2	2	2	2	2	2	2	2
AX-147244914	Araip.B03	105702035	Araip.B03	105702035	B03	131.1	B03_105702035_Bat	-	1	1	2	2	2	2	2	2	2	2	2	2	2	2	2	2	2	2	2	2	2	2	2	2	2	2	2	2	2	2	2	2	2	2	2	2	2	2	2	2	2
AX-147244957	Araip.B03	107990191	Araip.B03	107990191	B03	132.392	B03_107990191_Bat	-	1	1	2	2	2	2	2	2	2	2	2	2	2	2	2	2	2	2	2	2	2	2	2	2	2	2	2	2	2	2	2	2	2	2	2	2	2	2	2	2	2
AX-147244952	Araip.B03	107862731	Araip.B03	107862731	B03	132.758	B03_107862731_Bat	-	1	1	2	2	2	2	2	2	2	2	2	2	2	2	2	2	2	2	2	2	2	2	2	2	2	2	2	2	2	2	2	2	2	3	2	2	2	2	2	2	2
AX-147245131	Araip.B03	116532562	Araip.B03	116532562	B03	137.972	B03_116532562_Bat	-	1	1	2	2	1	2	2	2	2	2	2	2	2	2	2	2	2	2	2	2	2	2	2	2	2	2	2	2	2	2	2	2	2	2	2	2	2	2	2	2	2
AX-147246175	Araip.B03	133535658	Araip.B03	133535658	B03	140.28	B03_133535658_Bat	-	1	1	2	2	2	2	2	2	2	2	2	2	2	2	2	2	2	2	2	2	2	2	2	2	2	2	2	2	2	2	2	2	2	2	2	2	2	2	2	2	2
AX-147246243	Araip.B03	134565969	Araip.B03	134565969	B03	143.156	B03_134565969_Bat	-	1	1	2	2	2	2	2	2	2	2	2	2	2	2	2	2	2	2	2	2	2	2	2	2	2	2	2	2	2	2	2	2	2	2	2	2	2	2	2	2	2
AX-147246008	Araip.B03	131102052	Araip.B03	131102052	B03	144.728	B03_131102052_Bat	-	1	1	2	2	2	2	2	2	2	2	2	2	2	2	2	2	2	2	2	2	2	2	2	2	2	2	2	2	2	2	2	2	2	2	2	2	2	2	2	2	2
AX-147245845	Araip.B03	129243482	Araip.B03	129243482	B03	146.742	B03_129243482_Bat	-	1	1	2	2	2	2	2	2	2	2	2	2	2	2	2	2	2	2	2	2	2	2	2	2	2	2	2	2	2	2	2	2	2	2	2	2	2	2	2	2	2
AX-147245794	Araip.B03	128561705	Araip.B03	128561705	B03	147.788	B03_128561705_Bat	-	1	1	2	2	2	2	2	2	2	2	2	2	2	2	2	2	2	2	2	2	2	2	2	2	2	2	2	2	2	2	2	2	2	2	2	2	2	2	2	2	2
AX-147245713	Araip.B03	127846394	Araip.B03	127846394	B03	149.705	B03_127846394_Bat	-	1	1	2	2	2	2	2	2	2	2	2	2	2	2	2	2	2	2	2	2	2	2	2	2	2	2	2	2	2	2	2	2	2	2	2	2	2	2	2	2	2
AX-147245798	Araip.B03	128586889	Araip.B03	128586889	B03	150.655	B03_128586889_Bat	-	1	1	2	2	2	2	2	2	2	2	2	2	2	2	2	2	2	2	2	2	2	2	2	2	2	2	2	2	2	2	2	2	2	2	2	2	2	2	2	2	2
AX-147218217	Aradu.A03	128737567	Araip.B03	129421384	B03	151.322	B03_129421384_Bat	-	1	1	2	2	2	2	-	1	2	2	2	2	2	2	2	3	3	3	3	3	3	2	2	2	3	3	2	2	2	3	2	3	3	2	-	2	2	3	2	3	3
AX-147245799	Araip.B03	128595897	Araip.B03	128595897	B03	152.58	B03_128595897_Bat	-	1	1	2	2	2	2	2	2	2	2	2	2	2	2	2	2	2	2	2	2	2	2	2	2	2	2	2	2	2	2	2	2	2	2	2	2	2	2	2	2	2
AX-147245397	Araip.B03	122344889	Araip.B03	122344889	B03	155.057	B03_122344889_Bat	-	1	1	2	2	2	2	2	2	2	2	2	2	2	2	2	2	2	2	2	2	2	2	2	2	2	2	2	2	2	2	2	2	2	2	2	2	2	2	2	2	2
AX-147245379	Araip.B03	121854190	Araip.B03	121854190	B03	155.265	B03_121854190_Bat	-	1	1	2	2	2	2	2	2	2	2	2	2	2	2	2	2	2	2	2	2	2	2	2	2	2	2	2	2	2	2	2	2	2	2	2	2	2	2	2	2	2
AX-147245305	Araip.B03	120994272	Araip.B03	120994272	B03	155.933	B03_120994272_Bat	-	1	1	2	2	2	2	2	2	2	2	2	2	2	2	2	2	2	2	2	2	2	2	2	2	2	2	2	2	2	2	2	2	2	2	2	2	2	2	2	2	2
AX-147245252	Araip.B03	119952995	Araip.B03	119952995	B03	156.456	B03_119952995_Bat	-	1	1	2	2	2	2	2	2	2	2	2	2	2	2	2	2	2	2	2	2	2	2	2	2	2	2	2	2	2	2	2	2	2	2	2	2	2	2	2	2	2
AX-147246055	Araip.B03	131578937	Araip.B03	131578937	B03	168.979	B03_131578937_Bat	-	1	1	2	2	2	2	2	2	2	2	2	2	2	2	2	2	2	2	2	2	2	2	2	2	2	2	2	2	2	2	2	2	2	2	2	2	2	2	2	2	2
AX-147245721	Araip.B03	127877949	Araip.B03	127877949	B03	173.165	B03_127877949_Bat	-	1	1	2	2	2	2	2	2	2	2	2	2	2	2	2	2	2	2	2	2	2	2	2	2	2	2	2	2	2	2	2	2	2	2	2	2	2	2	2	2	2
AX-147244354	Araip.B03	32004125	Araip.B03	32004125	B03	202.555	B03_32004125_Bat	-	1	1	2	2	2	2	2	2	2	2	2	2	2	2	2	2	2	2	2	2	2	2	2	2	2	2	2	2	2	2	2	2	2	2	2	2	2	2	2	2	2
AX-147244788	Araip.B03	87264562	Araip.B03	87264562	B03	210.298	B03_87264562_Bat	-	1	1	2	2	2	2	2	2	2	2	2	2	2	2	2	2	2	2	2	2	2	2	2	2	2	2	2	2	2	2	2	2	2	2	2	2	2	2	2	2	2
AX-147244779	Araip.B03	85018251	Araip.B03	85018251	B03	213.827	B03_85018251_Bat	-	1	1	2	2	2	2	2	2	2	2	2	2	2	2	2	2	2	2	2	2	2	2	2	2	2	2	2	2	2	2	2	2	2	2	2	2	2	2	2	2	2
AX-147244492	Araip.B03	39072399	Araip.B03	39072399	B03	216.522	B03_39072399_Bat	-	1	1	2	2	2	2	2	2	2	2	2	2	2	2	2	2	2	2	2	2	2	2	2	2	2	2	2	2	2	2	2	2	2	2	2	2	2	2	2	2	2
AX-147244674	Araip.B03	69505648	Araip.B03	69505648	B03	217.345	B03_69505648_Bat	-	1	1	2	2	2	2	2	2	2	2	2	2	2	2	2	2	2	2	2	2	2	2	2	2	2	2	2	2	2	2	2	2	2	2	2	2	2	2	2	2	2
AX-147244707	Araip.B03	73582941	Araip.B03	73582941	B03	218.166	B03_73582941_Bat	-	1	1	2	2	2	2	2	2	2	2	2	2	2	2	2	2	2	2	2	2	2	2	2	2	2	2	2	2	2	2	2	2	2	2	2	2	2	2	2	2	2
AX-147247069	Araip.B04	10528843	Araip.B04	10528843	B04	21.256	B04_10528843_Bat	-	1	1	2	2	2	2	2	2	2	2	2	2	2	2	2	2	2	2	2	2	2	2	2	2	2	3	2	2	3	2	2	2	2	-	2	3	3	2	2	2	2
AX-147247126	Araip.B04	11603547	Araip.B04	11603547	B04	22.839	B04_11603547_Bat	-	1	1	2	2	2	2	2	2	2	2	2	2	2	2	2	2	2	2	2	2	2	2	2	2	2	3	2	2	3	2	2	2	2	2	2	3	3	2	2	2	2
AX-147247141	Araip.B04	12863751	Araip.B04	12863751	B04	25.179	B04_12863751_Bat	-	1	1	2	2	2	2	2	2	2	2	2	2	2	2	2	2	2	2	2	2	2	2	2	2	2	1	2	2	1	2	2	2	2	-	2	1	1	2	2	2	2
AX-147247242	Araip.B04	15571791	Araip.B04	15571791	B04	28.908	B04_15571791_Bat	-	1	1	2	2	2	2	2	2	2	2	2	2	2	2	2	2	2	2	2	2	2	2	2	2	2	3	2	2	3	2	2	2	2	2	2	-	3	2	2	2	2
AX-147247346	Araip.B04	20169338	Araip.B04	20169338	B04	33.809	B04_20169338_Bat	-	1	1	2	2	2	2	2	2	2	2	2	2	2	2	2	2	2	2	2	2	2	2	2	2	2	1	2	2	1	2	2	2	2	2	2	1	1	2	2	2	2
AX-147247306	Araip.B04	17705669	Araip.B04	17705669	B04	36.309	B04_17705669_Bat	-	1	1	2	2	2	2	2	2	2	2	2	2	2	2	2	2	2	2	2	2	2	2	2	2	2	3	2	2	3	2	2	2	2	2	2	3	3	2	2	2	2
AX-147247652	Araip.B04	65310676	Araip.B04	65310676	B04	39.939	B04_65310676_Bat	-	1	1	2	2	2	2	2	2	2	2	2	2	2	2	2	2	2	2	2	2	2	2	2	2	2	3	2	2	3	2	2	2	2	2	2	3	3	2	2	2	2
AX-147247530	Araip.B04	34380514	Araip.B04	34380514	B04	40.543	B04_34380514_Bat	-	1	1	2	2	2	2	2	2	2	2	2	2	2	2	2	2	2	2	2	2	2	2	2	2	2	3	2	2	3	2	2	2	2	2	2	3	3	2	2	2	2
AX-147247828	Araip.B04	98319952	Araip.B04	98319952	B04	43.675	B04_98319952_Bat	-	1	1	2	2	2	2	2	3	2	2	2	2	2	2	2	2	2	2	2	2	2	2	2	2	2	3	2	2	3	2	2	2	2	2	2	3	3	2	2	2	2
AX-147247692	Araip.B04	76642274	Araip.B04	76642274	B04	45.686	B04_76642274_Bat	-	1	1	2	2	2	2	2	2	2	2	2	2	2	2	2	2	2	2	2	2	2	2	2	2	2	3	2	2	3	2	2	2	2	2	2	3	3	2	2	2	2
AX-147247723	Araip.B04	79586685	Araip.B04	79586685	B04	53.042	B04_79586685_Bat	-	1	1	2	2	2	2	2	2	2	2	2	2	2	2	2	2	2	2	2	2	2	2	2	2	2	1	2	2	1	2	2	2	2	2	2	1	1	2	2	2	2
AX-147248044	Araip.B04	112529010	Araip.B04	112529010	B04	66.341	B04_112529010_Bat	-	1	1	2	2	2	2	2	2	2	2	2	2	2	2	2	2	2	2	2	2	2	2	2	2	2	3	2	2	3	2	2	2	2	2	2	3	3	2	2	2	2
AX-147248038	Araip.B04	112209558	Araip.B04	112209558	B04	73.216	B04_112209558_Bat	-	1	1	2	2	2	2	2	2	2	2	2	2	2	2	2	2	2	2	2	2	2	2	2	2	2	3	2	2	3	2	2	2	2	2	2	3	3	2	2	2	2
AX-147248049	Araip.B04	112676991	Araip.B04	112676991	B04	76.113	B04_112676991_Bat	-	1	1	2	2	2	2	2	2	2	2	2	2	2	2	2	2	2	2	2	2	2	2	2	2	2	1	2	2	1	2	2	2	2	2	2	1	1	2	2	2	2
AX-147248111	Araip.B04	114719295	Araip.B04	114719295	B04	77.18	B04_114719295_Bat	-	1	1	2	2	2	2	2	2	2	2	2	2	2	2	2	2	2	2	2	2	2	2	2	2	2	2	2	2	2	2	2	2	2	2	2	2	2	2	2	2	2
AX-147248246	Araip.B04	118035444	Araip.B04	118035444	B04	82.628	B04_118035444_Bat	-	1	1	2	2	2	2	2	2	2	2	2	2	2	2	2	2	2	2	2	2	2	2	2	2	2	2	2	2	2	2	2	2	2	2	2	2	2	2	2	2	2
AX-147220932	Aradu.A04	115676287	Araip.B04	125379700	B04	92.193	B04_125379700_Bat	-	1	1	2	2	2	2	2	-	2	2	3	3	3	2	2	2	2	2	2	2	2	2	2	2	2	2	2	2	2	2	2	2	2	2	2	2	2	2	2	2	2
AX-147248566	Araip.B04	127389859	Araip.B04	127389859	B04	94.908	B04_127389859_Bat	-	1	1	2	2	2	2	2	2	2	2	2	2	2	2	2	2	2	2	2	2	2	2	2	2	2	2	2	2	2	2	2	2	2	2	2	2	2	2	2	2	2
AX-147248606	Araip.B04	128330975	Araip.B04	128330975	B04	100.103	B04_128330975_Bat	-	1	1	2	2	2	2	2	2	2	2	2	2	2	2	2	2	2	2	2	2	2	2	2	2	2	2	2	2	2	2	2	2	2	2	2	2	2	2	2	2	2
AX-147248690	Araip.B04	129537876	Araip.B04	129537876	B04	104.717	B04_129537876_Bat	-	1	1	2	2	2	2	2	2	2	2	2	2	2	2	2	2	2	2	2	2	2	2	2	2	2	2	2	2	2	2	2	2	2	2	2	2	2	2	2	2	2
AX-147248854	Araip.B04	131462529	Araip.B04	131462529	B04	112.488	B04_131462529_Bat	-	1	1	2	2	2	2	2	2	2	2	2	2	3	2	2	2	2	2	2	2	2	2	2	2	2	2	2	2	2	2	2	2	2	2	2	2	2	2	2	2	2
AX-147221332	Aradu.A04	121110175	Araip.B04	131365313	B04	113.803	B04_131365313_Bat	-	1	1	2	2	2	2	2	2	2	2	2	2	3	2	2	2	2	2	2	2	2	2	2	2	2	2	2	2	2	2	2	2	2	2	2	2	2	2	2	2	2
AX-147249145	Araip.B05	9201494	Araip.B05	9201494	B05	0	B05_9201494_Bat	-	1	1	2	2	2	2	2	2	2	2	2	2	2	2	2	2	2	2	2	2	2	2	2	2	2	2	2	2	2	2	2	2	2	2	2	2	2	2	2	2	2
AX-147249229	Araip.B05	11783876	Araip.B05	11783876	B05	3.542	B05_11783876_Bat	-	1	1	2	2	2	2	2	2	2	2	2	2	2	2	2	2	2	2	2	2	2	2	2	2	2	2	2	2	2	2	2	2	2	2	2	2	2	2	2	2	2
AX-147249286	Araip.B05	13136222	Araip.B05	13136222	B05	5.51	B05_13136222_Bat	-	1	1	2	2	2	2	2	2	2	2	2	2	2	2	2	2	2	2	2	2	2	2	2	2	2	2	2	2	2	2	2	2	2	2	2	2	2	2	2	2	2
AX-147249313	Araip.B05	14565015	Araip.B05	14565015	B05	7.719	B05_14565015_Bat	-	1	1	2	2	2	2	2	2	2	2	2	2	2	2	2	2	2	2	2	2	2	2	2	2	2	2	2	2	2	2	2	2	2	2	2	2	2	2	2	2	2
AX-147249334	Araip.B05	15044886	Araip.B05	15044886	B05	8.289	B05_15044886_Bat	-	1	1	2	2	2	2	2	2	2	2	2	2	2	2	2	2	2	2	2	2	2	2	2	2	2	2	2	2	2	2	2	2	2	2	2	2	2	2	2	2	2
AX-147249353	Araip.B05	15251148	Araip.B05	15251148	B05	9.735	B05_15251148_Bat	-	1	1	2	2	2	2	2	2	2	2	2	2	2	2	2	2	2	2	2	2	2	2	2	2	2	2	2	2	2	2	2	2	2	2	2	2	2	2	2	2	2
AX-147249407	Araip.B05	16541904	Araip.B05	16541904	B05	11.255	B05_16541904_Bat	-	1	1	2	2	2	2	2	2	2	2	2	2	2	2	2	2	2	2	2	2	2	2	2	2	2	2	2	2	2	2	2	2	2	2	2	2	2	2	2	2	2
AX-147249470	Araip.B05	17973620	Araip.B05	17973620	B05	12.827	B05_17973620_Bat	-	1	1	2	2	2	2	2	2	2	2	2	2	2	2	2	2	2	2	2	2	2	2	2	2	2	2	2	2	2	2	2	2	2	2	2	2	2	2	2	2	2
AX-147249464	Araip.B05	17909630	Araip.B05	17909630	B05	17.757	B05_17909630_Bat	-	1	1	2	2	2	2	2	2	2	2	2	2	2	2	2	2	2	2	2	2	2	2	2	2	2	2	2	2	2	2	2	2	2	2	2	2	2	2	2	2	2
AX-147249773	Araip.B05	29566484	Araip.B05	29566484	B05	24.767	B05_29566484_Bat	-	1	1	2	2	2	2	2	2	2	2	2	2	2	2	2	2	2	2	2	2	2	2	2	2	2	2	2	2	2	2	2	2	2	2	2	2	2	2	2	2	2
AX-147249835	Araip.B05	33182321	Araip.B05	33182321	B05	26.239	B05_33182321_Bat	-	1	1	2	2	2	2	2	2	2	2	2	2	2	2	2	2	2	2	2	2	2	2	2	2	2	2	2	2	2	2	2	2	2	2	2	2	2	2	2	2	2
AX-147249883	Araip.B05	43385041	Araip.B05	43385041	B05	28.156	B05_43385041_Bat	-	1	1	2	2	2	2	2	2	2	2	2	2	2	2	2	2	2	2	2	2	2	2	2	2	2	2	2	2	2	2	2	2	2	2	2	2	2	2	2	2	2
AX-147249942	Araip.B05	57773989	Araip.B05	57773989	B05	30.631	B05_57773989_Bat	-	1	1	2	2	2	2	2	2	2	2	2	2	2	2	2	2	2	2	2	2	2	2	2	2	2	2	2	2	2	2	2	2	2	2	2	2	2	2	2	2	2
AX-147250057	Araip.B05	106441239	Araip.B05	106441239	B05	32.865	B05_106441239_Bat	-	1	1	2	2	2	2	2	2	2	2	2	2	2	2	2	2	2	2	2	2	2	2	2	2	2	2	2	2	2	2	2	2	2	2	2	2	2	2	2	2	2
AX-147250073	Araip.B05	107759702	Araip.B05	107759702	B05	34.586	B05_107759702_Bat	-	1	1	2	2	2	2	2	2	2	2	2	2	2	2	2	2	2	2	2	2	2	2	2	2	2	2	2	2	2	2	2	2	2	2	2	2	2	2	2	2	2
AX-147250202	Araip.B05	117310886	Araip.B05	117310886	B05	36.894	B05_117310886_Bat	-	1	1	2	2	2	2	2	2	2	2	2	2	2	2	2	2	2	2	2	2	2	2	2	2	2	2	2	2	2	2	2	2	2	2	2	2	2	2	2	2	2
AX-147250331	Araip.B05	123573318	Araip.B05	123573318	B05	37.733	B05_123573318_Bat	-	1	1	2	2	2	2	2	2	2	2	2	2	2	2	2	2	2	2	2	2	2	2	2	2	2	2	2	2	2	2	2	2	2	2	2	2	2	2	2	2	2
AX-147250253	Araip.B05	120292915	Araip.B05	120292915	B05	39.745	B05_120292915_Bat	-	1	1	2	2	2	2	2	2	2	2	2	2	2	2	2	2	2	2	2	2	2	2	2	2	2	2	2	2	2	2	2	2	2	2	2	2	2	2	2	2	2
AX-147250350	Araip.B05	124713719	Araip.B05	124713719	B05	42.703	B05_124713719_Bat	-	1	1	2	2	2	2	2	2	2	2	2	2	2	2	2	2	2	2	2	2	2	2	2	2	2	2	2	2	2	2	2	2	2	2	2	2	2	2	2	2	2
AX-147250541	Araip.B05	132586908	Araip.B05	132586908	B05	54.253	B05_132586908_Bat	-	1	1	2	2	2	2	2	2	2	2	2	2	2	2	2	2	2	2	2	2	2	2	2	2	2	2	2	2	2	2	2	2	2	2	2	2	2	2	2	2	2
AX-147250693	Araip.B05	137526639	Araip.B05	137526639	B05	68.57	B05_137526639_Bat	-	1	1	2	2	2	2	2	2	2	2	2	2	2	2	2	2	2	2	2	2	2	2	2	2	2	2	2	2	2	2	2	2	2	2	2	2	2	2	2	2	2
AX-147250724	Araip.B05	138154235	Araip.B05	138154235	B05	75.23	B05_138154235_Bat	-	1	1	2	2	2	2	2	2	2	2	2	2	2	2	2	2	2	2	2	2	2	2	2	2	2	2	2	2	2	2	2	2	2	2	2	2	2	2	2	2	2
AX-147250751	Araip.B05	138918340	Araip.B05	138918340	B05	77.396	B05_138918340_Bat	-	1	1	2	2	2	2	2	2	2	2	2	2	2	2	2	2	2	2	2	2	2	2	2	2	2	2	2	2	2	2	2	2	2	2	2	2	2	2	2	2	2
AX-147250846	Araip.B05	141248763	Araip.B05	141248763	B05	80.952	B05_141248763_Bat	-	1	1	2	2	2	2	2	2	2	2	2	2	2	2	2	2	2	2	2	2	2	2	2	2	2	2	2	2	2	2	2	2	2	2	2	2	2	2	2	2	2
AX-147250948	Araip.B05	142726106	Araip.B05	142726106	B05	84.696	B05_142726106_Bat	-	1	1	2	2	2	2	2	2	2	2	2	2	2	2	2	2	2	2	2	2	2	2	2	2	2	2	2	2	2	2	2	2	2	2	2	2	2	2	2	2	2
AX-147250873	Araip.B05	141584110	Araip.B05	141584110	B05	95.844	B05_141584110_Bat	-	1	1	2	2	2	2	2	2	2	2	2	2	2	2	2	2	2	2	2	2	2	2	2	2	2	2	2	2	2	2	2	2	2	2	2	2	2	2	2	2	2
AX-147250971	Araip.B05	143107610	Araip.B05	143107610	B05	107.217	B05_143107610_Bat	-	1	1	2	2	2	2	2	2	2	2	2	2	2	2	2	2	2	2	2	2	2	2	2	2	2	2	2	2	2	2	2	2	2	2	2	2	2	2	2	2	2
AX-147251018	Araip.B05	143642749	Araip.B05	143642749	B05	108.746	B05_143642749_Bat	-	1	1	2	2	2	2	2	2	2	2	2	2	2	2	2	2	2	2	2	2	2	2	2	2	2	2	2	2	2	2	2	2	2	2	2	2	2	2	2	2	2
AX-147251039	Araip.B05	143744093	Araip.B05	143744093	B05	109.704	B05_143744093_Bat	-	1	1	2	2	2	2	2	2	2	2	2	2	2	2	2	2	2	2	2	2	2	2	2	2	2	2	2	2	2	2	2	2	2	2	2	2	2	2	2	2	2
AX-147251155	Araip.B05	145480213	Araip.B05	145480213	B05	111.737	B05_145480213_Bat	-	1	1	2	2	2	2	2	2	2	2	2	2	2	2	2	2	2	2	2	2	2	2	2	2	2	2	2	2	2	2	2	2	2	2	2	2	2	2	2	2	2
AX-147251678	Araip.B06	2108147	Araip.B06	2108147	B06	0	B06_2108147_Bat	-	1	1	2	2	2	2	2	2	2	2	2	2	2	2	2	2	2	2	2	2	2	2	2	2	2	2	2	2	2	2	2	2	2	2	2	2	2	2	2	2	2
AX-147251730	Araip.B06	2915383	Araip.B06	2915383	B06	1.703	B06_2915383_Bat	-	1	1	2	2	2	2	2	2	2	2	2	2	2	2	2	2	2	2	2	2	2	2	2	2	2	2	2	2	2	2	2	2	2	2	2	2	2	2	2	2	2
AX-147251821	Araip.B06	4119125	Araip.B06	4119125	B06	5.698	B06_4119125_Bat	-	1	1	2	2	2	2	2	2	2	2	2	2	2	2	2	2	2	2	2	2	2	2	2	2	2	2	2	2	2	2	2	2	2	2	2	2	2	2	2	2	2
AX-147251889	Araip.B06	4893923	Araip.B06	4893923	B06	7.358	B06_4893923_Bat	-	1	1	2	2	2	2	2	2	2	2	2	2	2	2	2	2	2	2	2	2	2	2	2	2	2	2	2	2	2	2	2	2	2	2	2	2	2	2	2	2	2
AX-147251933	Araip.B06	5330839	Araip.B06	5330839	B06	8.654	B06_5330839_Bat	-	1	1	2	2	2	2	2	2	2	2	2	2	2	2	2	2	2	2	2	2	2	2	2	2	2	2	2	2	2	2	2	2	2	2	2	2	2	2	2	2	2
AX-147251964	Araip.B06	5774061	Araip.B06	5774061	B06	11.121	B06_5774061_Bat	-	1	1	2	2	2	2	2	2	2	2	2	2	2	2	2	2	2	2	2	2	2	2	2	2	2	2	2	2	2	2	2	2	2	2	2	2	2	2	2	2	2
AX-147251981	Araip.B06	6067801	Araip.B06	6067801	B06	13.38	B06_6067801_Bat	-	1	1	2	2	2	2	2	2	2	2	2	2	2	2	2	2	2	2	2	2	2	2	2	2	2	2	2	2	2	2	2	2	2	2	2	2	2	2	2	2	2
AX-147252036	Araip.B06	7482970	Araip.B06	7482970	B06	17.717	B06_7482970_Bat	-	1	1	2	2	2	2	2	2	2	2	2	2	2	2	2	2	2	2	2	2	2	2	2	2	2	2	2	2	2	2	2	2	2	2	2	2	2	2	2	2	2
AX-147252072	Araip.B06	8516083	Araip.B06	8516083	B06	20.277	B06_8516083_Bat	-	1	1	2	2	2	2	2	2	2	2	2	2	2	2	2	2	2	2	2	2	2	2	2	2	2	2	2	2	2	2	2	2	2	2	2	2	2	2	2	2	2
AX-147252136	Araip.B06	10237204	Araip.B06	10237204	B06	21.826	B06_10237204_Bat	-	1	1	2	2	2	2	2	2	2	2	2	2	2	2	2	2	2	2	2	2	2	2	2	2	2	2	2	2	2	2	2	2	2	2	2	2	2	2	2	2	2
AX-147252233	Araip.B06	12341058	Araip.B06	12341058	B06	27.942	B06_12341058_Bat	-	1	1	2	2	2	2	2	2	2	2	2	2	2	2	2	2	2	2	2	2	2	2	2	2	2	2	2	2	2	2	2	2	2	2	2	2	2	2	2	2	2
AX-147252315	Araip.B06	14178060	Araip.B06	14178060	B06	38.155	B06_14178060_Bat	-	1	1	2	2	2	2	2	2	2	2	2	2	2	2	2	2	2	2	2	2	2	2	2	2	2	2	2	2	2	2	2	2	2	2	2	2	2	2	2	2	2
AX-147252365	Araip.B06	14920883	Araip.B06	14920883	B06	40.126	B06_14920883_Bat	-	1	1	2	2	2	2	2	2	2	2	2	2	2	2	2	2	2	2	2	2	2	2	2	2	2	2	2	2	2	2	2	2	2	2	2	2	2	2	2	2	2
AX-147252377	Araip.B06	15389258	Araip.B06	15389258	B06	41.29	B06_15389258_Bat	-	1	1	2	2	2	2	2	2	2	2	2	2	2	2	2	2	2	2	2	2	2	2	2	2	2	2	2	2	2	2	2	2	2	2	2	2	2	2	2	2	2
AX-147252357	Araip.B06	14689445	Araip.B06	14689445	B06	42.554	B06_14689445_Bat	-	1	1	2	2	2	2	2	2	2	2	2	2	2	2	2	2	2	2	2	2	2	2	2	2	2	2	2	2	2	2	2	2	2	2	2	2	2	2	2	2	2
AX-147252499	Araip.B06	19526959	Araip.B06	19526959	B06	47.52	B06_19526959_Bat	-	1	1	2	2	2	2	2	2	2	2	2	2	2	2	2	2	2	2	2	2	2	2	2	2	2	2	2	2	2	2	2	2	2	2	2	2	2	2	2	2	2
AX-147252603	Araip.B06	23447599	Araip.B06	23447599	B06	49.163	B06_23447599_Bat	-	1	1	2	2	2	2	2	2	2	2	2	2	2	2	2	2	2	2	2	2	2	2	2	2	2	2	2	2	2	2	2	2	2	2	2	2	2	2	2	2	2
AX-147252564	Araip.B06	21746656	Araip.B06	21746656	B06	49.533	B06_21746656_Bat	-	1	1	2	2	2	2	2	2	2	2	2	2	2	2	2	2	2	2	2	2	2	2	2	2	2	2	2	2	2	2	2	2	2	2	2	2	2	2	2	2	2
AX-147252522	Araip.B06	20680642	Araip.B06	20680642	B06	50.796	B06_20680642_Bat	-	1	1	2	2	2	2	2	2	2	2	2	2	2	2	2	2	2	2	2	2	2	2	2	2	2	2	2	2	2	2	2	2	2	2	2	2	2	2	2	2	2
AX-147252621	Araip.B06	24339183	Araip.B06	24339183	B06	52.173	B06_24339183_Bat	-	1	1	2	2	2	2	2	2	2	2	2	2	2	2	2	2	2	2	2	2	2	2	2	2	2	2	2	2	2	2	2	2	2	2	2	2	2	2	2	2	2
AX-147252835	Araip.B06	43944501	Araip.B06	43944501	B06	55.013	B06_43944501_Bat	-	1	1	2	2	2	2	2	2	2	2	2	2	2	2	2	2	2	2	2	2	2	2	2	2	2	2	2	2	2	2	2	2	2	2	2	2	2	2	2	2	2
AX-147252888	Araip.B06	64142185	Araip.B06	64142185	B06	56.019	B06_64142185_Bat	-	1	1	2	2	2	2	2	2	2	2	2	2	2	2	2	2	2	2	2	2	2	2	2	2	2	2	2	2	2	2	2	2	2	2	2	2	2	2	2	2	2
AX-147252803	Araip.B06	37768124	Araip.B06	37768124	B06	63.179	B06_37768124_Bat	-	1	1	2	2	2	2	2	2	2	2	2	2	2	2	2	2	2	2	2	2	2	2	2	2	2	2	2	2	2	2	2	2	2	2	2	2	2	2	2	2	2
AX-147252964	Araip.B06	88491980	Araip.B06	88491980	B06	64.471	B06_88491980_Bat	-	1	1	2	2	2	2	2	2	2	2	2	2	2	2	2	2	2	2	2	2	2	2	2	2	2	2	2	2	2	2	2	2	2	2	2	2	2	2	2	2	2
AX-147252777	Araip.B06	34780735	Araip.B06	34780735	B06	65.176	B06_34780735_Bat	-	1	1	2	2	2	2	2	2	2	2	2	2	2	2	2	2	2	2	2	2	2	2	2	2	2	2	2	2	2	2	2	2	2	2	2	2	2	2	2	2	2
AX-147252686	Araip.B06	27994454	Araip.B06	27994454	B06	68.602	B06_27994454_Bat	-	1	1	2	2	2	2	2	2	2	2	2	2	2	2	2	2	2	2	2	2	2	2	2	2	2	2	2	2	2	2	2	2	2	2	2	2	2	2	2	2	2
AX-147253000	Araip.B06	97783076	Araip.B06	97783076	B06	72.388	B06_97783076_Bat	-	1	1	2	2	2	2	2	2	2	2	2	2	2	2	2	2	2	2	2	2	2	2	2	2	2	2	2	2	2	2	2	2	2	2	2	2	2	2	2	2	2
AX-147253055	Araip.B06	102088989	Araip.B06	102088989	B06	74.808	B06_102088989_Bat	-	1	1	2	2	2	2	2	2	2	2	2	2	2	2	2	2	2	2	2	2	2	2	2	2	2	2	2	2	2	2	2	2	2	2	2	2	2	2	2	2	2
AX-147253080	Araip.B06	104154374	Araip.B06	104154374	B06	76.064	B06_104154374_Bat	-	1	1	2	2	2	2	2	2	2	2	2	2	2	2	2	2	2	2	2	2	2	2	2	2	2	2	2	2	2	2	2	2	2	2	2	2	2	2	2	2	2
AX-147253456	Araip.B06	121814302	Araip.B06	121814302	B06	97.175	B06_121814302_Bat	-	1	1	2	2	2	2	2	2	2	2	2	2	2	2	2	2	2	2	2	2	2	2	2	2	2	2	2	2	2	2	2	2	2	2	2	2	2	2	2	2	2
AX-147253469	Araip.B06	122337830	Araip.B06	122337830	B06	99.208	B06_122337830_Bat	-	1	1	2	2	2	2	2	2	2	2	2	2	2	2	2	2	2	2	2	2	2	2	2	2	2	2	2	2	2	2	2	2	2	2	2	2	2	2	2	2	2
AX-147253667	Araip.B06	126838179	Araip.B06	126838179	B06	104.943	B06_126838179_Bat	-	1	1	2	2	2	2	2	2	2	2	2	2	2	2	2	2	2	2	2	2	2	2	2	2	2	2	2	2	2	2	2	2	2	2	2	2	2	2	2	2	2
AX-147253514	Araip.B06	123529801	Araip.B06	123529801	B06	110.895	B06_123529801_Bat	-	1	1	2	2	2	2	2	2	2	2	2	2	2	2	2	2	2	2	2	2	2	2	2	2	2	2	2	2	2	2	2	2	2	2	2	2	2	2	2	2	2
AX-147253637	Araip.B06	126063888	Araip.B06	126063888	B06	111.71	B06_126063888_Bat	-	1	1	2	2	2	2	2	2	2	2	2	2	2	2	2	2	2	2	2	2	2	2	2	2	2	2	2	2	2	2	2	2	2	2	2	2	2	2	2	2	2
AX-147253756	Araip.B06	128403562	Araip.B06	128403562	B06	114.979	B06_128403562_Bat	-	1	1	2	2	2	2	2	2	2	2	2	2	2	2	2	2	2	2	2	2	2	2	2	2	2	2	2	2	2	2	2	2	2	2	2	2	2	2	2	2	2
AX-147253742	Araip.B06	128290662	Araip.B06	128290662	B06	115.562	B06_128290662_Bat	-	1	1	2	2	2	2	2	2	2	2	2	2	2	2	2	2	2	2	2	2	2	2	2	2	2	2	2	2	2	2	2	2	2	2	2	2	2	2	2	2	2
AX-147253779	Araip.B06	128992668	Araip.B06	128992668	B06	117.897	B06_128992668_Bat	-	1	1	2	2	1	2	2	2	2	2	2	2	2	2	2	2	2	2	2	2	2	2	2	2	2	2	2	2	2	2	2	2	1	2	2	2	2	2	1	2	2
AX-147253822	Araip.B06	129411090	Araip.B06	129411090	B06	120.138	B06_129411090_Bat	-	1	1	2	2	2	2	2	2	2	2	2	2	2	2	2	2	2	2	2	2	2	2	2	2	2	2	2	2	2	2	2	2	2	2	2	2	2	2	2	2	2
AX-147253856	Araip.B06	130108581	Araip.B06	130108581	B06	129.83	B06_130108581_Bat	-	1	1	2	2	2	2	2	2	2	2	2	2	2	2	2	2	2	2	2	2	2	2	2	2	2	2	2	2	2	2	2	2	2	2	2	2	2	2	2	2	2
AX-147254043	Araip.B06	133341872	Araip.B06	133341872	B06	138.475	B06_133341872_Bat	-	1	1	2	2	2	2	2	2	2	2	2	2	2	2	2	2	2	2	2	2	2	2	2	2	2	2	2	2	2	2	2	2	2	2	2	2	2	2	2	2	2
AX-147254084	Araip.B06	133625056	Araip.B06	133625056	B06	147.341	B06_133625056_Bat	-	1	1	2	2	2	2	2	2	2	2	2	2	2	2	2	2	2	2	2	2	2	2	2	2	2	2	2	2	2	2	2	2	2	2	2	2	2	2	2	2	2
AX-147254153	Araip.B06	134198142	Araip.B06	134198142	B06	160.422	B06_134198142_Bat	-	1	1	2	2	2	2	2	2	2	2	2	2	2	2	2	2	2	2	2	2	2	2	2	2	2	2	2	2	2	2	2	2	2	2	2	2	2	2	2	2	2
AX-147254226	Araip.B06	135631919	Araip.B06	135631919	B06	168.689	B06_135631919_Bat	-	1	1	2	2	2	2	2	2	2	2	2	2	2	2	2	2	2	2	2	2	2	2	2	2	2	2	2	2	2	2	2	2	2	2	2	2	2	2	2	2	2
AX-147226758	Aradu.A06	110933833	Araip.B06	135788589	B06	169.987	B06_135788589_Bat	-	1	1	2	2	2	2	2	2	2	2	2	2	2	2	2	2	2	2	2	2	2	2	2	2	2	2	2	2	2	2	2	2	2	2	2	2	2	2	2	2	2
AX-147254273	Araip.B06	136738322	Araip.B06	136738322	B07	7.782	B06_136738322_Bat	-	1	1	2	2	2	2	2	2	2	2	2	2	2	2	2	2	2	2	2	2	2	2	2	2	2	2	2	2	2	2	2	2	2	2	2	2	2	2	2	2	2
AX-147254526	Araip.B07	2693761	Araip.B07	2693761	B07	18.151	B07_2693761_Bat	-	1	1	2	2	2	2	2	2	2	2	2	2	2	2	2	2	2	2	2	2	2	2	2	2	2	2	2	2	2	2	2	2	2	2	2	2	2	2	2	2	2
AX-147254456	Araip.B07	1941111	Araip.B07	1941111	B07	20.5	B07_1941111_Bat	-	1	1	2	2	2	2	2	2	2	2	2	2	2	2	2	2	2	2	2	2	2	2	2	2	2	2	2	2	2	2	2	2	2	2	2	2	2	2	2	2	2
AX-147254462	Araip.B07	1948113	Araip.B07	1948113	B07	20.901	B07_1948113_Bat	-	1	1	2	2	2	2	2	2	2	2	2	2	2	2	2	2	2	2	2	2	2	2	2	2	2	2	2	2	2	2	2	2	2	2	2	2	2	2	2	2	2
AX-147254466	Araip.B07	1977695	Araip.B07	1977695	B07	22.338	B07_1977695_Bat	-	1	1	2	2	2	2	2	2	2	2	2	2	2	2	2	2	2	2	2	2	2	2	2	2	2	2	2	2	2	2	2	2	2	2	2	2	2	2	2	2	2
AX-147254550	Araip.B07	2911833	Araip.B07	2911833	B07	24.443	B07_2911833_Bat	-	1	1	2	2	2	2	2	2	2	2	2	2	2	2	2	2	2	2	2	2	2	2	2	2	2	2	2	2	2	2	2	2	2	2	2	2	2	2	2	2	2
AX-147254599	Araip.B07	3510743	Araip.B07	3510743	B07	27.916	B07_3510743_Bat	-	1	1	2	2	2	2	2	2	2	2	2	2	2	2	2	2	2	2	2	2	2	2	2	2	2	2	2	2	2	2	2	2	2	2	2	2	2	2	2	2	2
AX-147254688	Araip.B07	4382301	Araip.B07	4382301	B07	31.904	B07_4382301_Bat	-	1	1	2	2	2	2	2	2	2	2	2	2	2	2	2	2	2	2	2	2	2	2	2	2	2	2	2	2	2	2	2	2	2	2	2	2	2	2	2	2	2
AX-147254784	Araip.B07	5743938	Araip.B07	5743938	B07	38.642	B07_5743938_Bat	-	1	1	2	2	2	2	2	2	2	2	2	2	2	2	2	2	2	2	2	2	2	2	2	2	2	2	2	-	2	2	2	2	2	2	2	2	2	2	2	2	2
AX-147254869	Araip.B07	7446821	Araip.B07	7446821	B07	47.188	B07_7446821_Bat	-	1	1	2	2	2	2	2	2	2	2	2	2	2	2	2	2	2	2	2	2	2	2	2	2	2	2	2	2	2	2	2	2	2	2	2	2	2	2	2	2	2
AX-147254885	Araip.B07	8461159	Araip.B07	8461159	B07	47.733	B07_8461159_Bat	-	1	1	2	2	2	2	2	2	2	2	2	2	2	2	2	2	2	2	2	2	2	2	2	2	2	2	2	2	2	2	2	2	2	2	2	2	2	2	2	2	2
AX-147254932	Araip.B07	9871294	Araip.B07	9871294	B07	51.793	B07_9871294_Bat	-	1	1	2	2	2	2	2	2	2	2	2	2	2	2	2	2	2	2	2	2	2	2	2	2	2	2	2	2	2	2	2	2	2	2	2	2	2	2	2	2	2
AX-147255004	Araip.B07	11218651	Araip.B07	11218651	B07	54.365	B07_11218651_Bat	-	1	1	2	2	2	2	2	2	2	2	2	2	2	2	2	2	2	2	2	2	2	2	2	2	2	2	2	2	2	2	2	2	2	2	2	2	2	2	2	2	2
AX-147255063	Araip.B07	12937358	Araip.B07	12937358	B07	56.9	B07_12937358_Bat	-	1	1	2	2	2	2	2	2	2	2	2	2	2	2	2	2	2	2	2	2	2	2	2	2	2	2	2	2	2	2	2	2	2	2	2	2	2	2	2	2	2
AX-147255096	Araip.B07	13913316	Araip.B07	13913316	B07	58.193	B07_13913316_Bat	-	1	1	2	2	2	2	2	2	2	2	2	2	2	2	2	2	2	2	2	2	2	2	2	2	2	2	2	2	2	2	2	2	2	2	2	2	2	2	2	2	2
AX-147255743	Araip.B07	54435336	Araip.B07	54435336	B07	60.837	B07_54435336_Bat	-	1	1	2	2	2	2	2	2	2	2	2	2	2	2	2	2	2	2	2	2	2	2	2	2	2	2	2	2	2	2	2	2	2	2	2	2	2	2	2	2	2
AX-147255415	Araip.B07	27260116	Araip.B07	27260116	B07	68.701	B07_27260116_Bat	-	1	1	2	2	2	2	2	2	2	2	2	2	2	2	2	2	2	2	2	2	2	2	2	2	2	2	2	2	2	2	2	2	2	2	2	2	2	2	2	2	2
AX-147228735	Aradu.A07	69433697	Araip.B07	32191781	B07	70.72	B07_32191781_Bat	-	1	1	2	2	2	2	2	2	2	2	2	2	2	2	2	2	2	2	2	2	2	2	2	2	2	2	2	2	2	2	2	2	2	2	2	2	2	2	2	2	2
AX-147255578	Araip.B07	35118089	Araip.B07	35118089	B07	72.416	B07_35118089_Bat	-	1	1	2	2	2	2	2	2	2	2	2	2	2	2	2	2	2	2	2	2	2	2	2	2	2	2	2	2	2	2	2	2	2	2	2	2	2	2	2	2	2
AX-147255592	Araip.B07	36138425	Araip.B07	36138425	B07	72.779	B07_36138425_Bat	-	1	1	2	2	2	2	2	2	2	2	2	2	2	2	2	2	2	2	2	2	2	2	2	2	2	2	2	2	2	2	2	2	2	2	2	2	2	2	2	2	2
AX-147255716	Araip.B07	51073486	Araip.B07	51073486	B07	80.119	B07_51073486_Bat	-	1	1	2	2	2	2	2	2	2	2	2	2	2	2	2	2	2	2	2	2	2	2	2	2	2	2	2	2	2	2	2	2	2	2	2	2	2	2	2	2	2
AX-147255687	Araip.B07	47528888	Araip.B07	47528888	B07	80.124	B07_47528888_Bat	-	1	1	2	2	2	2	2	2	2	2	2	2	2	2	2	2	2	2	2	2	2	2	2	2	2	2	2	2	2	2	2	2	2	2	2	2	2	2	2	2	2
AX-147255885	Araip.B07	86904970	Araip.B07	86904970	B07	80.89	B07_86904970_Bat	-	1	1	2	2	2	2	2	2	2	2	2	2	2	2	2	2	2	2	2	2	2	2	2	2	2	2	2	2	2	2	2	2	2	2	2	2	2	2	2	2	2
AX-147256038	Araip.B07	103170829	Araip.B07	103170829	B07	82.4	B07_103170829_Bat	-	1	1	2	2	2	2	2	2	2	2	2	2	2	2	2	2	2	2	2	2	2	2	2	2	2	2	2	2	2	2	2	2	2	2	2	2	2	2	2	2	2
AX-147256010	Araip.B07	102296689	Araip.B07	102296689	B07	82.7	B07_102296689_Bat	-	1	1	2	2	-	2	2	2	2	2	2	2	2	2	2	2	2	2	2	2	2	2	2	2	2	2	2	2	2	2	2	2	2	2	2	2	2	2	2	2	2
AX-147256002	Araip.B07	102227971	Araip.B07	102227971	B07	83.986	B07_102227971_Bat	-	1	1	2	2	2	2	2	2	2	2	2	2	2	2	2	2	2	2	2	2	2	2	2	2	2	2	2	2	2	2	2	2	2	2	2	2	2	2	2	2	2
AX-147256076	Araip.B07	105566627	Araip.B07	105566627	B07	85.748	B07_105566627_Bat	-	1	1	2	2	2	2	2	2	2	2	2	2	2	2	2	2	2	2	2	2	2	2	2	2	2	2	2	2	2	2	2	2	2	2	2	2	2	2	2	2	2
AX-147256086	Araip.B07	105778119	Araip.B07	105778119	B07	86.315	B07_105778119_Bat	-	1	1	2	2	2	2	2	2	2	2	2	2	2	2	2	2	2	2	2	2	2	2	2	2	2	2	2	2	2	2	2	2	2	2	2	2	2	2	2	2	2
AX-147256083	Araip.B07	105747743	Araip.B07	105747743	B07	86.319	B07_105747743_Bat	-	1	1	2	2	2	2	2	2	2	2	2	2	2	2	2	2	2	2	2	2	2	2	2	2	2	2	2	2	2	2	2	2	2	2	2	2	2	2	2	2	2
AX-147256150	Araip.B07	108723784	Araip.B07	108723784	B07	88.532	B07_108723784_Bat	-	1	1	2	2	2	2	2	2	2	2	2	2	2	2	2	2	2	2	2	2	2	2	2	2	2	2	2	2	2	2	2	2	2	2	2	2	2	2	2	2	2
AX-147256197	Araip.B07	111420088	Araip.B07	111420088	B07	91.324	B07_111420088_Bat	-	1	1	2	2	2	2	2	2	2	2	2	2	2	2	2	2	2	2	2	2	2	2	2	2	2	2	2	2	2	2	2	2	2	2	2	2	2	2	2	2	2
AX-147256313	Araip.B07	113526914	Araip.B07	113526914	B07	95.492	B07_113526914_Bat	-	1	1	2	2	2	2	2	2	2	2	2	2	2	2	2	2	2	2	2	2	2	2	2	2	2	2	2	2	2	2	2	2	2	2	2	2	2	2	2	2	2
AX-147256306	Araip.B07	113384646	Araip.B07	113384646	B07	96.528	B07_113384646_Bat	-	1	1	2	2	2	2	2	2	2	2	2	2	2	2	2	2	2	2	2	2	2	2	2	2	2	2	2	2	2	2	2	2	2	2	2	2	2	2	2	2	2
AX-147256349	Araip.B07	114537681	Araip.B07	114537681	B07	97.928	B07_114537681_Bat	-	1	1	2	2	2	2	2	2	2	2	2	2	2	2	2	2	2	2	2	2	2	2	2	2	2	2	2	2	2	2	2	2	2	2	2	2	2	2	2	2	2
AX-147256567	Araip.B07	120477607	Araip.B07	120477607	B07	109.917	B07_120477607_Bat	-	1	1	2	2	2	2	2	2	2	2	2	2	2	2	2	2	2	2	2	2	2	2	2	2	2	2	2	2	2	2	3	2	3	2	2	2	3	2	2	2	3
AX-147256596	Araip.B07	121040436	Araip.B07	121040436	B07	114.838	B07_121040436_Bat	-	1	1	2	2	2	2	2	2	2	2	2	2	2	2	2	2	2	2	2	2	2	2	2	2	2	2	2	2	2	2	3	2	3	2	2	2	3	2	2	2	3
AX-147256623	Araip.B07	121762693	Araip.B07	121762693	B07	116.689	B07_121762693_Bat	-	1	1	2	2	2	2	2	2	2	2	2	2	2	2	2	2	2	2	2	2	2	2	2	2	2	2	2	2	2	2	3	2	3	2	2	2	3	2	2	2	3
AX-147256650	Araip.B07	122219815	Araip.B07	122219815	B07	120.8	B07_122219815_Bat	-	1	1	2	2	2	2	2	2	2	2	2	2	2	2	2	2	2	2	2	2	2	2	2	2	2	2	2	2	2	2	3	2	3	2	2	2	3	2	2	2	3
AX-147256836	Araip.B07	124845218	Araip.B07	124845218	B07	139.033	B07_124845218_Bat	-	1	1	2	2	2	2	2	2	2	2	2	2	2	2	2	2	2	2	2	2	2	2	2	2	2	2	2	2	2	2	1	2	1	2	2	2	1	2	2	2	1
AX-147259610	Araip.B09	444888	Araip.B09	444888	B08	0	B09_444888_Bat	-	1	1	2	2	2	2	2	2	2	2	2	2	2	2	2	2	2	2	2	2	2	3	3	2	2	2	2	2	2	2	2	2	2	3	3	2	2	2	2	2	2
AX-147228780	Aradu.A07	71002934	Araip.B09	370671	B08	0.822	B09_370671_Bat	-	1	1	2	2	2	2	2	2	2	2	2	2	2	2	2	2	2	2	2	2	2	3	3	2	3	2	2	2	2	2	2	2	2	3	3	2	2	2	2	2	2
AX-147257026	Araip.B08	1153337	Araip.B08	1153337	B08	12.775	B08_1153337_Bat	-	1	1	2	2	2	2	2	-	2	2	2	2	2	2	2	2	2	2	2	2	2	3	3	2	2	2	2	2	2	2	2	2	2	3	3	2	2	2	2	2	2
AX-147257036	Araip.B08	1208921	Araip.B08	1208921	B08	13.305	B08_1208921_Bat	-	1	1	2	2	2	2	2	2	2	2	2	2	2	2	2	2	2	2	2	2	2	3	3	2	2	2	2	2	2	2	2	2	2	3	3	2	2	2	2	2	2
AX-147257214	Araip.B08	2856677	Araip.B08	2856677	B08	31.798	B08_2856677_Bat	-	1	1	2	2	2	2	2	2	2	2	2	2	2	2	2	2	2	2	2	2	2	1	1	2	2	2	2	2	2	2	2	2	2	1	1	2	2	2	2	2	2
AX-147257243	Araip.B08	3136502	Araip.B08	3136502	B08	33.483	B08_3136502_Bat	-	1	1	2	2	2	2	2	2	2	2	2	2	2	2	2	2	2	2	2	2	2	3	3	2	2	2	2	2	2	2	2	2	2	3	3	2	2	2	2	2	2
AX-147257270	Araip.B08	3608931	Araip.B08	3608931	B08	39.84	B08_3608931_Bat	-	1	1	2	2	2	2	2	2	2	2	2	2	2	2	2	2	2	2	2	2	2	3	3	2	2	2	2	2	2	2	2	3	2	3	3	2	2	2	2	2	2
AX-147257315	Araip.B08	4136509	Araip.B08	4136509	B08	42.595	B08_4136509_Bat	-	1	1	2	2	2	2	2	2	2	2	2	2	2	2	2	2	2	2	2	2	2	3	3	2	2	2	2	2	2	2	2	3	2	3	3	2	2	2	2	2	2
AX-147257484	Araip.B08	6642505	Araip.B08	6642505	B08	56.806	B08_6642505_Bat	-	1	1	2	2	2	2	2	2	2	2	2	2	2	2	2	2	2	2	2	2	2	2	2	2	2	2	2	2	2	2	2	2	2	2	2	2	2	2	2	2	2
AX-147257496	Araip.B08	7180609	Araip.B08	7180609	B08	58.212	B08_7180609_Bat	-	1	1	2	2	2	2	2	2	2	2	2	2	2	2	2	2	2	2	2	2	2	2	2	2	2	2	2	2	2	2	2	2	2	2	2	2	2	2	2	2	2
AX-147257575	Araip.B08	8800146	Araip.B08	8800146	B08	62.237	B08_8800146_Bat	-	1	1	2	2	2	2	2	2	2	2	2	2	2	2	2	2	2	2	2	2	2	2	2	2	2	2	2	2	2	2	2	2	2	2	2	2	2	2	2	2	2
AX-147257589	Araip.B08	9109213	Araip.B08	9109213	B08	63.512	B08_9109213_Bat	-	1	1	2	2	2	2	2	2	2	2	2	2	2	2	2	2	2	2	2	2	2	2	2	2	2	2	2	2	2	2	2	2	2	2	2	2	2	2	2	2	2
AX-147257555	Araip.B08	8081527	Araip.B08	8081527	B08	68.782	B08_8081527_Bat	-	1	1	2	2	2	2	2	2	2	2	2	2	2	2	2	2	2	2	2	2	2	2	2	2	2	2	2	2	2	2	2	2	2	2	2	2	2	2	2	2	2
AX-147257598	Araip.B08	9331139	Araip.B08	9331139	B08	75.625	B08_9331139_Bat	-	1	1	2	2	2	2	2	2	2	2	2	2	2	2	2	2	2	2	2	2	2	2	2	2	2	2	2	2	2	2	2	2	2	2	2	2	2	2	2	2	2
AX-147257601	Araip.B08	9518553	Araip.B08	9518553	B08	76.964	B08_9518553_Bat	-	1	1	2	2	2	2	2	2	2	2	2	2	2	2	2	2	2	2	2	2	2	2	2	2	2	2	2	2	2	2	2	2	2	2	2	2	2	2	2	2	2
AX-147257604	Araip.B08	9527707	Araip.B08	9527707	B08	77.524	B08_9527707_Bat	-	1	1	2	2	2	2	2	2	2	2	2	2	2	2	2	2	2	2	2	2	2	2	2	2	2	2	2	2	2	2	2	2	2	2	2	2	2	2	2	2	2
AX-147240657	Araip.B02	7274745	Araip.B02	7274745	B08	81.966	B02_7274745_Bat	-	1	1	2	2	2	2	2	2	2	2	2	2	2	2	2	2	2	2	2	2	2	2	2	2	2	2	2	2	2	2	2	2	2	2	2	2	2	2	2	2	2
AX-147257766	Araip.B08	14883080	Araip.B08	14883080	B08	83.671	B08_14883080_Bat	-	1	1	2	2	2	2	2	2	2	2	2	2	2	2	2	2	2	2	2	2	2	2	2	2	2	2	2	2	2	2	2	2	2	2	2	2	2	2	2	2	2
AX-147257944	Araip.B08	22051920	Araip.B08	22051920	B08	92.802	B08_22051920_Bat	-	1	1	2	2	2	2	2	2	2	2	2	2	2	2	2	2	2	2	2	2	2	2	2	2	2	2	2	2	2	2	2	2	2	2	2	2	2	2	2	2	2
AX-147257969	Araip.B08	22720982	Araip.B08	22720982	B08	93.46	B08_22720982_Bat	-	1	1	2	2	2	2	2	2	2	2	2	2	2	2	2	2	2	2	2	2	2	2	2	2	2	2	2	2	2	2	2	2	2	2	2	2	2	2	2	2	2
AX-147257928	Araip.B08	21487186	Araip.B08	21487186	B08	95.467	B08_21487186_Bat	-	1	1	2	2	2	2	2	2	2	2	2	2	2	2	2	2	2	2	2	2	2	2	2	2	2	2	2	2	2	2	2	2	2	2	2	2	2	2	2	2	2
AX-147257990	Araip.B08	23635067	Araip.B08	23635067	B08	97.779	B08_23635067_Bat	-	1	1	2	2	2	2	2	2	2	2	2	2	2	2	2	2	2	2	2	2	2	2	2	2	2	2	2	2	2	2	2	2	2	2	2	2	2	2	2	2	2
AX-147258047	Araip.B08	26013615	Araip.B08	26013615	B08	100.935	B08_26013615_Bat	-	1	1	2	2	2	2	2	2	2	2	2	2	2	2	2	2	2	2	2	2	2	2	2	2	2	2	2	2	2	2	2	2	2	2	2	2	2	2	2	2	2
AX-147225568	Aradu.A06	79840222	Araip.B08	36820777	B08	110.158	B08_36820777_Bat	-	1	1	2	2	2	2	2	2	2	2	2	2	2	2	2	2	2	2	2	2	2	2	2	2	2	2	2	2	2	2	2	2	2	2	2	2	2	2	2	2	2
AX-147258300	Araip.B08	45351170	Araip.B08	45351170	B08	115.948	B08_45351170_Bat	-	1	1	2	2	2	2	2	2	2	2	2	2	2	2	2	2	2	2	2	2	2	2	2	2	2	2	2	2	2	2	2	2	2	2	2	2	2	2	2	2	2
AX-147258254	Araip.B08	42179335	Araip.B08	42179335	B08	118.95	B08_42179335_Bat	-	1	1	2	2	2	-	2	2	2	2	2	2	2	2	2	2	2	2	2	2	2	2	2	2	2	2	2	2	2	2	2	2	2	2	2	2	2	2	2	2	2
AX-147258624	Araip.B08	103035345	Araip.B08	103035345	B08	124.186	B08_103035345_Bat	-	1	1	2	2	2	2	2	2	2	2	2	2	2	2	2	2	2	2	2	2	2	2	2	2	2	2	2	2	2	2	2	2	2	2	2	2	2	2	2	2	2
AX-147258558	Araip.B08	97797942	Araip.B08	97797942	B08	125.763	B08_97797942_Bat	-	1	1	2	2	2	2	2	2	2	2	2	2	2	2	2	2	2	2	2	2	2	2	2	2	2	2	2	2	2	2	2	2	2	2	2	2	2	2	2	2	2
AX-147258555	Araip.B08	97762318	Araip.B08	97762318	B08	126.61	B08_97762318_Bat	-	1	1	2	2	2	2	2	2	2	2	2	2	2	2	2	2	2	2	2	2	2	2	2	2	2	2	2	2	2	2	2	2	2	2	2	2	2	2	2	2	2
AX-147258321	Araip.B08	47793525	Araip.B08	47793525	B08	130.85	B08_47793525_Bat	-	1	1	2	2	2	2	2	2	2	2	2	2	2	2	2	2	2	2	2	2	2	2	2	2	2	2	2	2	2	2	2	2	2	2	2	2	2	2	2	2	2
AX-147258310	Araip.B08	46900789	Araip.B08	46900789	B08	131.994	B08_46900789_Bat	-	1	1	2	2	2	2	2	2	2	2	2	2	2	2	2	2	2	2	2	2	2	2	2	2	2	2	2	2	2	2	2	2	2	2	2	2	2	2	2	2	2
AX-147258718	Araip.B08	107419341	Araip.B08	107419341	B08	138.592	B08_107419341_Bat	-	1	1	2	2	2	2	2	2	2	2	2	2	2	2	2	2	2	2	2	2	2	2	2	2	2	2	2	2	2	2	2	2	2	2	2	2	2	2	2	2	2
AX-147231175	Aradu.A08	38560701	Araip.B08	108072587	B08	139.766	B08_108072587_Bat	-	1	1	2	2	2	2	2	2	2	2	2	2	2	2	2	2	2	2	2	2	2	2	2	2	2	2	2	2	2	2	2	2	2	2	2	2	2	2	2	2	2
AX-147258709	Araip.B08	107231756	Araip.B08	107231756	B08	140.073	B08_107231756_Bat	-	1	1	2	2	2	2	2	2	2	2	2	2	2	2	2	2	2	2	2	2	2	2	2	2	2	2	2	2	2	2	2	2	2	2	2	2	2	2	2	2	2
AX-147258811	Araip.B08	111890724	Araip.B08	111890724	B08	142.307	B08_111890724_Bat	-	1	1	2	2	2	2	2	2	2	2	2	2	2	2	2	2	2	2	2	2	2	2	2	2	2	2	2	2	2	2	2	2	2	2	2	2	2	2	2	2	2
AX-147258902	Araip.B08	115107805	Araip.B08	115107805	B08	143.378	B08_115107805_Bat	-	1	1	2	2	2	2	2	2	2	2	2	2	2	2	2	2	2	2	2	2	2	2	2	2	2	2	2	2	2	2	2	2	2	2	2	2	2	2	2	2	2
AX-147259082	Araip.B08	119797710	Araip.B08	119797710	B08	147.154	B08_119797710_Bat	-	1	1	2	2	2	2	2	2	2	2	2	2	2	2	2	2	2	2	2	2	2	2	2	2	2	2	2	2	2	2	2	2	2	2	2	2	2	2	2	2	2
AX-147259180	Araip.B08	122186860	Araip.B08	122186860	B08	149.367	B08_122186860_Bat	-	1	1	2	2	2	2	2	2	2	2	2	2	2	2	2	2	2	2	2	2	2	2	2	2	2	2	2	2	2	2	2	2	2	2	2	2	2	2	2	2	2
AX-147259174	Araip.B08	122095822	Araip.B08	122095822	B08	150.417	B08_122095822_Bat	-	1	1	2	2	2	2	2	2	2	2	2	2	2	2	2	2	2	2	2	2	2	2	2	2	2	2	2	2	2	2	2	2	2	2	2	2	2	2	2	2	2
AX-147259182	Araip.B08	122223999	Araip.B08	122223999	B08	150.74	B08_122223999_Bat	-	1	1	2	2	2	2	2	2	2	2	2	2	2	2	2	2	2	2	2	2	2	2	2	2	2	2	2	2	2	2	2	2	2	2	2	2	2	2	2	2	2
AX-147259123	Araip.B08	120913013	Araip.B08	120913013	B08	159.675	B08_120913013_Bat	-	1	1	2	2	2	2	2	2	2	2	2	2	2	2	2	2	2	2	2	2	2	2	2	2	2	2	2	2	2	2	2	2	2	2	2	2	2	2	2	2	2
AX-147259163	Araip.B08	121556595	Araip.B08	121556595	B08	161.727	B08_121556595_Bat	-	1	1	2	2	2	-	2	3	-	2	2	2	2	2	2	2	-	2	2	2	2	2	2	2	2	2	2	3	3	2	-	-	2	3	2	2	2	2	2	2	2
AX-147259233	Araip.B08	123156664	Araip.B08	123156664	B08	164.588	B08_123156664_Bat	-	1	1	2	2	2	2	2	2	2	2	2	2	2	2	2	2	2	2	2	2	2	2	2	2	2	2	2	2	2	2	2	2	2	2	2	2	2	2	2	2	2
AX-147259301	Araip.B08	124374378	Araip.B08	124374378	B08	167.774	B08_124374378_Bat	-	1	1	2	2	2	2	2	2	2	2	2	2	2	2	2	2	2	2	2	2	2	2	2	2	2	2	2	2	2	2	2	2	2	2	2	2	2	2	2	2	2
AX-147259404	Araip.B08	126900291	Araip.B08	126900291	B08	174.673	B08_126900291_Bat	-	1	1	2	2	2	2	2	2	2	2	2	2	2	2	2	2	2	2	2	2	2	2	2	2	2	2	2	2	2	2	2	2	2	2	2	2	2	2	2	2	2
AX-147259405	Araip.B08	126900333	Araip.B08	126900333	B08	175.629	B08_126900333_Bat	-	1	1	2	2	2	2	2	2	2	2	2	2	2	2	2	2	2	2	2	2	2	2	2	2	2	2	2	2	2	2	2	2	2	2	2	2	2	2	2	2	2
AX-147259508	Araip.B08	128550706	Araip.B08	128550706	B08	177.158	B08_128550706_Bat	-	1	1	2	2	2	2	2	2	2	2	2	2	2	2	2	2	2	2	2	2	2	2	2	2	2	2	2	2	2	2	2	2	2	2	2	2	2	2	2	2	2
AX-147259569	Araip.B08	129395945	Araip.B08	129395945	B08	178.78	B08_129395945_Bat	-	1	1	2	2	2	2	2	2	2	2	2	2	2	2	2	2	2	2	2	2	2	2	2	2	2	2	2	2	2	2	2	2	2	2	2	2	2	2	2	2	2
AX-147259661	Araip.B09	1093370	Araip.B09	1093370	B09	3.778	B09_1093370_Bat	-	1	1	2	2	2	2	2	2	2	2	2	2	2	2	2	2	2	2	2	2	2	3	2	2	2	2	2	2	2	2	2	2	2	3	2	2	2	2	2	2	2
AX-147259703	Araip.B09	1619980	Araip.B09	1619980	B09	8.312	B09_1619980_Bat	-	1	1	2	2	2	2	2	2	2	2	2	2	2	2	2	2	2	2	2	2	2	3	2	2	2	2	2	2	2	2	2	2	2	3	2	2	2	2	2	2	2
AX-147259787	Araip.B09	2624818	Araip.B09	2624818	B09	15.433	B09_2624818_Bat	-	1	1	2	2	2	2	2	2	2	2	2	2	2	2	2	2	2	2	2	2	2	3	2	2	2	2	2	2	2	2	2	2	2	3	2	2	2	2	2	2	2
AX-147259902	Araip.B09	4067865	Araip.B09	4067865	B09	27.189	B09_4067865_Bat	-	1	1	2	2	2	2	2	2	2	2	2	2	2	2	2	2	2	2	2	2	2	2	2	2	2	2	2	2	2	2	2	2	2	2	2	2	2	2	2	2	2
AX-147259938	Araip.B09	4594394	Araip.B09	4594394	B09	29.063	B09_4594394_Bat	-	1	1	2	2	2	2	2	2	2	2	2	2	2	2	2	2	2	2	2	2	2	2	2	2	2	2	2	2	2	2	2	2	2	2	2	2	2	2	2	2	2
AX-147260202	Araip.B09	10267117	Araip.B09	10267117	B09	44.901	B09_10267117_Bat	-	1	1	2	2	2	2	2	2	2	2	2	2	2	2	2	2	2	2	2	2	2	2	2	2	2	2	2	2	2	2	2	2	2	2	2	2	2	2	2	2	2
AX-147260253	Araip.B09	10966661	Araip.B09	10966661	B09	45.623	B09_10966661_Bat	-	1	1	2	2	2	2	2	2	2	2	2	2	2	2	2	2	2	2	2	2	2	2	2	2	2	2	2	2	2	2	2	2	2	2	2	2	2	2	2	2	2
AX-147260375	Araip.B09	11930085	Araip.B09	11930085	B09	47.304	B09_11930085_Bat	-	1	1	2	2	2	2	2	2	2	2	2	2	2	2	2	2	2	2	2	2	2	2	2	2	2	2	2	2	2	2	2	2	2	2	2	2	2	2	2	2	2
AX-147260411	Araip.B09	12279083	Araip.B09	12279083	B09	49.138	B09_12279083_Bat	-	1	1	2	2	2	2	2	2	2	2	2	2	2	2	2	2	2	2	2	2	2	2	2	2	2	2	2	2	2	2	2	2	2	2	2	2	2	2	2	2	2
AX-147264460	Araip.B10	117277383	Araip.B10	117277383	B09	52.86	B10_117277383_Bat	-	1	1	2	2	2	2	2	2	2	2	2	2	2	2	2	2	2	2	2	2	2	2	2	2	2	2	2	2	2	2	2	2	2	2	2	2	2	2	2	2	2
AX-147260449	Araip.B09	13960122	Araip.B09	13960122	B09	54.366	B09_13960122_Bat	-	1	1	2	2	2	2	2	2	2	2	2	2	2	2	2	2	2	2	2	2	2	2	2	2	2	2	2	2	2	2	2	2	2	2	2	2	2	2	2	2	2
AX-147232753	Aradu.A09	10663409	Araip.B04	110814287	B09	55.733	B04_110814287_Bat	-	1	1	2	2	2	2	2	2	2	2	1	1	1	2	2	2	2	2	2	2	2	2	2	2	2	2	2	2	2	2	2	2	2	2	2	2	2	2	2	2	2
AX-147260518	Araip.B09	15640616	Araip.B09	15640616	B09	59.853	B09_15640616_Bat	-	1	1	2	2	2	2	2	2	2	2	2	2	2	2	2	2	2	2	2	2	2	2	2	2	2	2	2	2	2	2	2	2	2	2	2	2	2	2	2	2	2
AX-147232812	Aradu.A09	12640492	Araip.B09	16577417	B09	61.666	B09_16577417_Bat	-	1	1	2	2	2	2	2	2	2	2	3	2	2	2	2	3	2	3	3	3	3	2	2	2	2	2	2	2	2	2	2	2	2	2	2	2	2	2	2	2	2
AX-147260643	Araip.B09	19338001	Araip.B09	19338001	B09	62.439	B09_19338001_Bat	-	1	1	2	2	2	2	2	2	2	2	2	2	2	2	2	2	2	2	2	2	2	2	2	2	2	2	2	2	2	2	2	2	2	2	2	2	2	2	2	2	2
AX-147260586	Araip.B09	17561151	Araip.B09	17561151	B09	62.764	B09_17561151_Bat	-	1	1	2	2	2	2	2	2	2	2	2	2	2	2	2	2	2	2	2	2	2	2	2	2	2	2	2	2	2	2	2	2	2	2	2	2	2	2	2	2	2
AX-147260650	Araip.B09	19732123	Araip.B09	19732123	B09	63.73	B09_19732123_Bat	-	1	1	2	2	2	2	2	2	2	2	2	2	2	2	2	2	2	2	2	2	2	2	2	2	2	2	2	2	2	2	2	2	2	2	2	2	2	2	2	2	2
AX-147260691	Araip.B09	21665230	Araip.B09	21665230	B09	65.391	B09_21665230_Bat	-	1	1	2	2	2	2	2	2	2	2	2	2	2	2	2	2	2	2	2	2	2	2	2	2	2	2	2	2	2	2	2	2	2	2	2	2	2	2	2	2	2
AX-147260789	Araip.B09	25497890	Araip.B09	25497890	B09	83.689	B09_25497890_Bat	-	1	1	2	2	2	2	2	2	2	2	2	2	2	2	2	2	2	2	2	2	2	2	2	2	2	2	2	2	2	2	2	2	2	2	2	2	2	2	2	2	2
AX-147260792	Araip.B09	25536327	Araip.B09	25536327	B09	83.955	B09_25536327_Bat	-	1	1	2	2	2	2	2	2	2	2	2	2	2	2	2	2	2	2	2	2	2	2	2	2	2	2	2	2	2	2	2	2	2	2	2	2	2	2	2	2	2
AX-147260826	Araip.B09	26873815	Araip.B09	26873815	B09	85.109	B09_26873815_Bat	-	1	1	2	2	2	2	2	2	2	2	2	2	2	2	2	2	2	2	2	2	2	2	2	2	2	2	2	2	2	2	2	2	2	2	2	2	2	2	2	2	2
AX-147261248	Araip.B09	88847854	Araip.B09	88847854	B09	88.983	B09_88847854_Bat	-	1	1	2	2	2	2	2	2	2	2	2	2	2	2	2	2	2	2	2	2	2	2	2	2	2	2	2	2	2	2	2	2	2	2	2	2	2	2	2	2	2
AX-147261313	Araip.B09	102419381	Araip.B09	102419381	B09	89.478	B09_102419381_Bat	-	1	1	2	2	2	2	2	2	2	2	2	2	2	2	2	2	2	2	2	2	2	2	2	2	2	2	3	2	2	2	2	2	2	2	2	2	2	2	2	2	2
AX-147261255	Araip.B09	89526297	Araip.B09	89526297	B09	90.389	B09_89526297_Bat	-	1	1	2	2	2	2	2	2	2	2	2	2	2	2	2	2	2	2	2	2	2	2	2	2	2	2	3	2	2	2	2	2	2	2	2	2	2	2	2	2	2
AX-147261070	Araip.B09	48924509	Araip.B09	48924509	B09	90.953	B09_48924509_Bat	-	1	1	2	2	2	2	2	2	2	2	2	2	2	2	2	2	2	2	2	2	2	2	2	2	2	2	3	2	2	2	2	2	2	2	2	2	2	2	2	2	2
AX-147261408	Araip.B09	112638595	Araip.B09	112638595	B09	92.152	B09_112638595_Bat	-	1	1	2	2	2	2	2	2	2	2	2	2	2	2	2	2	2	2	2	2	2	2	2	2	2	2	3	2	2	2	2	2	2	2	2	2	2	2	2	2	2
AX-147261411	Araip.B09	112644523	Araip.B09	112644523	B09	92.56	B09_112644523_Bat	-	1	1	2	2	2	2	2	2	2	2	2	2	2	2	2	2	2	2	2	2	2	2	2	2	2	2	3	2	2	2	2	2	2	2	2	2	2	2	2	2	2
AX-147261343	Araip.B09	105680394	Araip.B09	105680394	B09	93.939	B09_105680394_Bat	-	1	1	2	2	2	-	2	2	2	2	2	2	2	2	2	2	2	2	2	2	2	2	2	2	2	2	3	2	2	2	2	2	2	2	2	2	2	2	2	2	2
AX-147261388	Araip.B09	111618121	Araip.B09	111618121	B09	95.239	B09_111618121_Bat	-	1	1	2	2	2	2	2	2	2	2	2	2	2	2	2	2	2	2	2	2	2	2	2	2	2	2	1	2	2	2	2	2	2	2	2	2	2	2	2	2	2
AX-147261463	Araip.B09	115218860	Araip.B09	115218860	B09	96.941	B09_115218860_Bat	-	1	1	2	2	2	2	2	2	2	2	2	2	2	2	2	2	2	2	2	2	2	2	2	2	2	2	3	2	2	2	2	2	2	2	2	2	2	2	2	2	2
AX-147261522	Araip.B09	120664272	Araip.B09	120664272	B09	99.048	B09_120664272_Bat	-	1	1	2	2	2	2	2	2	2	2	2	2	2	2	2	2	2	2	2	2	2	2	2	2	2	2	3	2	2	2	2	2	2	2	2	2	2	2	2	2	2
AX-147261789	Araip.B09	131919794	Araip.B09	131919794	B09	102.703	B09_131919794_Bat	-	1	1	2	2	2	2	2	2	2	2	2	2	2	2	2	2	2	2	2	2	2	2	2	2	2	2	3	2	2	2	2	2	2	2	2	2	2	2	2	2	2
AX-147261938	Araip.B09	137323602	Araip.B09	137323602	B09	106.297	B09_137323602_Bat	-	1	1	2	2	2	2	2	2	2	2	2	2	2	2	2	2	2	2	2	2	2	2	2	2	2	2	2	2	2	2	2	2	2	2	2	2	2	2	2	2	2
AX-147261958	Araip.B09	137668463	Araip.B09	137668463	B09	110.277	B09_137668463_Bat	-	1	1	2	2	2	2	2	2	2	2	2	2	2	2	2	2	2	2	2	2	2	2	2	2	2	2	2	2	2	2	2	2	2	2	2	2	2	2	2	2	2
AX-147262112	Araip.B09	140643252	Araip.B09	140643252	B09	115.312	B09_140643252_Bat	-	1	1	2	2	2	2	2	2	2	2	2	2	2	2	2	2	2	2	2	2	2	2	2	2	2	2	2	2	2	2	2	2	2	2	2	2	2	2	2	2	2
AX-147262241	Araip.B09	142214599	Araip.B09	142214599	B09	121.763	B09_142214599_Bat	-	1	1	2	2	2	2	2	2	2	2	2	2	2	2	2	2	2	2	2	2	2	2	2	2	2	2	2	2	2	2	2	2	2	2	2	2	2	2	2	2	2
AX-147262258	Araip.B09	142396010	Araip.B09	142396010	B09	123.273	B09_142396010_Bat	-	1	1	2	2	2	2	2	2	2	2	2	2	2	2	2	2	2	2	2	2	2	2	2	2	2	2	2	2	2	2	2	2	2	2	2	2	2	2	2	2	2
AX-147262299	Araip.B09	142796440	Araip.B09	142796440	B09	125.68	B09_142796440_Bat	-	1	1	2	2	2	2	2	2	2	2	2	2	2	2	2	2	2	2	2	2	2	2	2	2	2	2	2	2	2	2	2	2	2	2	2	2	2	2	2	2	2
AX-147262597	Araip.B09	145693126	Araip.B09	145693126	B09	160.081	B09_145693126_Bat	-	1	1	2	2	2	2	2	2	2	2	2	2	2	2	2	2	2	2	2	2	2	2	2	2	2	2	2	2	2	2	2	2	2	2	2	2	2	2	2	2	2
AX-147262639	Araip.B09	146129189	Araip.B09	146129189	B09	166.058	B09_146129189_Bat	-	1	1	2	2	2	2	2	2	2	2	2	2	2	2	2	2	2	2	2	2	2	2	2	2	2	2	2	2	2	2	2	2	2	2	2	2	2	2	2	2	2
AX-147262661	Araip.B09	146449440	Araip.B09	146449440	B09	168.891	B09_146449440_Bat	-	1	1	2	2	2	2	2	2	2	2	2	2	2	2	2	2	2	2	2	2	2	2	2	2	2	2	2	2	2	2	2	2	2	2	2	2	2	2	2	2	2
AX-147263454	Araip.B10	10858605	Araip.B10	10858605	B10	3.891	B10_10858605_Bat	-	1	1	2	2	2	2	2	2	2	2	2	2	2	2	2	2	2	2	2	2	2	2	2	2	2	2	2	2	2	2	2	2	2	2	2	2	2	2	2	2	2
AX-147263461	Araip.B10	10904602	Araip.B10	10904602	B10	6.076	B10_10904602_Bat	-	1	1	2	2	2	2	2	2	2	2	2	2	2	2	2	2	2	2	2	2	2	2	2	2	2	2	2	2	2	2	2	2	2	2	2	2	2	2	2	2	2
AX-147263427	Araip.B10	10568223	Araip.B10	10568223	B10	8.776	B10_10568223_Bat	-	1	1	2	2	2	2	2	2	2	2	2	2	2	2	2	2	2	2	2	2	2	2	2	2	2	2	2	2	2	2	2	2	2	2	2	2	2	2	2	2	2
AX-147263360	Araip.B10	9532252	Araip.B10	9532252	B10	12.538	B10_9532252_Bat	-	1	1	2	2	2	2	2	2	2	2	2	2	2	2	2	2	2	2	2	2	2	2	2	2	2	2	2	2	2	2	2	2	2	2	2	2	2	2	2	2	2
AX-147263407	Araip.B10	10197283	Araip.B10	10197283	B10	14.297	B10_10197283_Bat	-	1	1	2	2	2	2	2	2	2	2	2	2	2	2	2	2	2	2	2	2	2	2	2	2	2	2	2	2	2	2	2	2	2	2	2	2	2	2	2	2	2
AX-147263446	Araip.B10	10717070	Araip.B10	10717070	B10	17.64	B10_10717070_Bat	-	1	1	2	2	2	2	2	2	2	2	2	2	2	2	2	2	2	2	2	2	2	2	2	2	2	2	2	2	2	2	2	2	2	2	2	2	2	2	2	2	2
AX-147263482	Araip.B10	11190130	Araip.B10	11190130	B10	20.72	B10_11190130_Bat	-	1	1	2	2	2	2	2	2	2	2	2	2	2	2	2	2	2	2	2	2	2	2	2	2	2	2	2	2	2	2	2	2	2	2	2	2	2	2	2	2	2
AX-147263500	Araip.B10	11433812	Araip.B10	11433812	B10	21.892	B10_11433812_Bat	-	1	1	2	2	2	2	2	2	2	2	2	2	2	2	2	2	2	2	2	2	2	2	2	2	2	2	2	2	2	2	2	2	2	2	2	2	2	2	2	2	2
AX-147263790	Araip.B10	24353115	Araip.B10	24353115	B10	32.528	B10_24353115_Bat	-	1	1	2	2	2	2	2	2	2	2	2	2	2	2	2	2	2	2	2	2	2	2	2	2	2	2	2	2	2	2	2	2	2	2	2	2	2	2	2	2	2
AX-147263804	Araip.B10	25370859	Araip.B10	25370859	B10	34.493	B10_25370859_Bat	-	1	1	2	2	2	2	2	2	2	2	2	2	2	2	2	2	2	2	2	2	2	2	2	2	2	2	2	2	2	2	2	2	2	2	2	2	2	2	2	2	2
AX-147264174	Araip.B10	98380273	Araip.B10	98380273	B10	39.145	B10_98380273_Bat	-	1	1	2	2	2	2	2	2	2	2	2	2	2	2	2	2	2	2	2	2	2	2	2	2	2	2	2	2	2	2	2	2	2	2	2	2	2	2	2	2	2
AX-147236093	Aradu.A10	71225571	Araip.B10	99270691	B10	40.423	B10_99270691_Bat	-	1	1	2	2	2	2	2	2	2	2	2	2	2	2	2	2	2	2	2	2	2	2	2	2	2	2	2	2	2	2	2	2	2	2	2	2	2	2	2	2	2
AX-147263880	Araip.B10	30806236	Araip.B10	30806236	B10	41.88	B10_30806236_Bat	-	1	1	2	2	2	2	2	2	2	2	2	2	2	2	2	2	2	2	2	2	2	2	2	2	2	2	2	2	2	2	2	2	2	2	2	2	2	2	2	2	2
AX-147263879	Araip.B10	30805465	Araip.B10	30805465	B10	42.978	B10_30805465_Bat	-	1	1	2	2	2	2	2	2	2	2	2	2	2	2	2	2	2	2	2	2	2	2	2	2	2	2	2	2	2	2	2	2	2	2	2	2	2	2	2	2	2
AX-147263878	Araip.B10	30805312	Araip.B10	30805312	B10	45.275	B10_30805312_Bat	-	1	1	2	2	2	2	2	2	2	2	2	2	2	2	2	2	2	2	2	2	2	2	2	2	2	2	2	2	2	2	2	2	2	2	2	2	2	2	2	2	2
AX-147264026	Araip.B10	50497532	Araip.B10	50497532	B10	58.683	B10_50497532_Bat	-	1	1	2	2	2	2	2	2	2	2	2	2	2	2	2	2	2	2	2	2	2	2	2	2	2	2	2	2	2	2	2	2	2	2	2	2	2	2	2	2	2
AX-147263930	Araip.B10	35908106	Araip.B10	35908106	B10	61.053	B10_35908106_Bat	-	1	1	2	2	2	2	2	2	2	2	2	2	2	2	2	2	2	2	2	2	2	2	2	2	2	2	2	2	2	2	2	2	2	2	2	2	2	2	2	2	2
AX-147264289	Araip.B10	109437124	Araip.B10	109437124	B10	66.117	B10_109437124_Bat	-	1	1	2	2	2	2	2	2	2	2	2	2	2	2	2	2	2	2	2	2	2	2	2	2	2	2	2	2	2	2	2	2	2	2	2	2	2	2	2	2	2
AX-147264288	Araip.B10	109436815	Araip.B10	109436815	B10	66.836	B10_109436815_Bat	-	1	1	2	2	2	2	2	2	2	2	2	2	2	2	2	2	2	2	2	2	2	2	2	2	2	2	2	2	2	2	2	2	2	2	2	2	2	2	2	2	2
AX-147264364	Araip.B10	112307281	Araip.B10	112307281	B10	68.624	B10_112307281_Bat	-	1	1	2	2	2	2	2	2	2	2	2	2	2	2	2	2	2	2	2	2	2	2	2	2	2	2	2	2	2	2	2	2	2	2	2	2	2	2	2	2	2
AX-147264509	Araip.B10	118687848	Araip.B10	118687848	B10	73.438	B10_118687848_Bat	-	1	1	2	2	2	2	2	2	2	2	2	2	2	2	2	2	2	2	2	2	2	2	2	2	2	2	2	2	2	2	2	2	2	2	2	2	2	2	2	2	2
AX-147264566	Araip.B10	120107250	Araip.B10	120107250	B10	76.354	B10_120107250_Bat	-	1	1	2	2	2	2	2	2	2	2	2	2	2	2	2	2	2	2	2	2	2	2	2	2	2	2	2	2	2	2	2	2	2	2	2	2	2	2	2	2	2
AX-147264579	Araip.B10	120537714	Araip.B10	120537714	B10	78.667	B10_120537714_Bat	-	1	1	2	2	2	2	2	2	2	2	2	2	2	2	2	2	2	2	2	2	2	2	2	2	2	2	2	2	2	2	2	2	2	2	2	2	2	2	2	2	2
AX-147264651	Araip.B10	123344874	Araip.B10	123344874	B10	80.896	B10_123344874_Bat	-	1	1	2	2	2	2	2	2	2	2	2	2	2	2	2	2	2	2	2	2	2	2	2	2	2	2	2	2	2	2	2	2	2	2	2	2	2	2	2	2	2
AX-147264637	Araip.B10	123158860	Araip.B10	123158860	B10	81.221	B10_123158860_Bat	-	1	1	2	2	2	2	2	2	2	2	2	2	2	2	2	2	2	2	2	2	2	2	2	2	2	2	2	2	2	2	2	2	2	2	2	2	2	2	2	2	2
AX-147264709	Araip.B10	124856896	Araip.B10	124856896	B10	83.38	B10_124856896_Bat	-	1	1	2	2	2	2	2	2	2	2	2	2	2	2	2	2	2	2	2	2	2	2	2	2	2	2	2	2	2	2	2	2	2	2	2	2	2	2	2	2	2
AX-147264758	Araip.B10	126325437	Araip.B10	126325437	B10	86.613	B10_126325437_Bat	-	1	1	2	2	2	2	2	2	2	2	2	2	2	2	2	2	2	2	2	2	2	2	2	2	2	2	2	2	2	2	2	2	2	2	2	2	2	2	2	2	2
AX-147264779	Araip.B10	127041901	Araip.B10	127041901	B10	87.278	B10_127041901_Bat	-	1	1	2	2	2	2	2	2	2	2	2	2	2	2	2	2	2	2	2	2	2	2	2	2	2	2	2	2	2	2	2	2	2	2	2	2	2	2	2	2	2
AX-147264783	Araip.B10	127093869	Araip.B10	127093869	B10	88.387	B10_127093869_Bat	-	1	1	2	2	2	2	2	2	2	2	2	2	2	2	2	2	2	2	2	2	2	2	2	2	2	2	2	2	2	2	2	2	2	2	2	2	2	2	2	2	2
AX-147264809	Araip.B10	127707657	Araip.B10	127707657	B10	89.93	B10_127707657_Bat	-	1	1	2	2	2	2	2	2	2	2	2	2	2	2	2	2	2	2	2	2	2	2	2	2	2	2	2	2	2	2	2	2	2	2	2	2	2	2	2	2	2
AX-147264918	Araip.B10	130283661	Araip.B10	130283661	B10	95.794	B10_130283661_Bat	-	1	1	2	2	2	2	2	2	2	2	2	2	2	2	2	2	2	2	2	2	2	2	2	2	2	2	2	2	2	2	2	2	2	2	2	2	2	2	2	2	2
AX-147264937	Araip.B10	130555022	Araip.B10	130555022	B10	96.765	B10_130555022_Bat	-	1	1	2	2	2	2	2	2	2	2	2	2	2	2	2	2	2	2	2	2	2	2	2	2	2	2	2	2	2	2	2	2	2	2	2	2	2	2	2	2	2
AX-147265599	Araip.B10	136009645	Araip.B10	136009645	B10	147.793	B10_136009645_Bat	-	1	1	2	2	2	2	2	2	2	2	2	2	2	2	2	2	2	2	2	2	2	2	2	2	2	2	2	2	2	2	2	2	2	2	2	2	2	2	2	2	2
AX-147265430	Araip.B10	134846322	Araip.B10	134846322	B10	151.647	B10_134846322_Bat	-	1	1	2	2	2	2	2	2	2	2	2	2	2	2	2	2	2	2	2	2	2	2	2	2	2	2	2	2	2	2	2	2	2	2	2	2	2	2	2	2	2
AX-147265407	Araip.B10	134693751	Araip.B10	134693751	B10	153.02	B10_134693751_Bat	-	1	1	2	2	2	2	2	2	2	2	2	2	2	2	2	2	2	2	2	2	2	2	2	2	2	2	2	2	2	2	2	2	2	2	2	2	2	2	2	2	2
AX-147265307	Araip.B10	134076186	Araip.B10	134076186	B10	156.871	B10_134076186_Bat	-	1	1	2	2	2	2	2	2	2	2	2	2	2	2	2	2	2	2	2	2	2	2	2	2	2	2	2	2	2	2	2	2	2	2	2	2	2	2	2	2	2
AX-147265297	Araip.B10	133993166	Araip.B10	133993166	B10	157.675	B10_133993166_Bat	-	1	1	2	2	2	2	2	2	2	2	2	2	2	2	2	2	2	2	2	2	2	2	2	2	2	2	2	2	2	2	2	2	2	2	2	2	2	2	2	2	2
AX-147265290	Araip.B10	133964405	Araip.B10	133964405	B10	158.888	B10_133964405_Bat	-	1	1	2	2	2	2	2	2	2	2	2	2	2	2	2	2	2	2	2	2	2	2	2	2	2	2	2	2	2	2	2	2	2	2	2	2	2	2	2	2	2
AX-147265249	Araip.B10	133727172	Araip.B10	133727172	B10	160.22	B10_133727172_Bat	-	1	1	2	2	2	2	2	2	2	2	2	2	2	2	2	2	2	2	2	2	2	2	2	2	2	2	2	2	2	2	2	2	2	2	2	2	2	2	2	2	2
AX-147265134	Araip.B10	132785375	Araip.B10	132785375	B10	163.384	B10_132785375_Bat	-	1	1	2	2	2	2	2	2	2	2	2	2	2	2	2	2	2	2	2	2	2	2	2	2	2	2	2	2	2	2	2	2	2	2	2	2	2	2	2	2	2
AX-147265217	Araip.B10	133561666	Araip.B10	133561666	B10	165.927	B10_133561666_Bat	-	1	1	2	2	2	2	2	2	2	2	2	2	2	2	2	2	2	2	2	2	2	2	2	2	2	2	2	2	2	2	2	2	2	2	2	2	2	2	2	2	2
[truncated: 285 more columns]

## Sheet: Table S8
								Pedigree	Control	Control	Control	Control	Control	Control	Control	Control	Control	Control	Control	Control	Control	Control	Control	Control	Control	Control	Control	Control	Control	Control	Control	Control	Control	Control	Control	Control	Control	Control	Control	Control	Control	Control	Control	Control	Control	Control	Control	Control	Control
								% Wild alleles	100	100	100	100	100	100	100	100	100	100	100	100	0.448934	0.448934	0.448934	0.448934	0.448934	0.448934	0.448934	0.448934	0.448934	0.448934	0.448934	0.448934	0.448934	0.561167	0.448934	0.561167	0.448934	0.561167	0.448934	0.561167	0.448934	0.561167	0.448934	0.561167	1.12233	1.12233	1.12233	1.12233	1.12233
								% Hyp alleles	0	0	0	0	0	0	0	0	0	0	0	0	99.5511	99.5511	99.5511	99.5511	99.5511	99.5511	99.5511	99.5511	99.5511	99.5511	99.5511	99.5511	99.5511	99.4388	99.5511	99.4388	99.5511	99.4388	99.5511	99.4388	99.5511	99.4388	99.5511	99.4388	98.8777	98.8777	98.8777	98.8777	98.8777
								% Wild alleles in Chr A02	96.1538	96.1538	96.1538	96.1538	96.1538	96.1538	96.1538	96.1538	96.1538	96.1538	96.1538	96.1538	0	0	0	0	0	0	0	0	0	0	0	0	0	0	0	0	0	0	0	0	0	0	0	0	0	0	0	0	0
								% Wild alleles in Bottom- A02	100	100	100	100	100	100	100	100	100	100	100	100	0	0	0	0	0	0	0	0	0	0	0	0	0	0	0	0	0	0	0	0	0	0	0	0	0	0	0	0	0
								% Wild alleles in Chr A09	100	100	100	100	100	100	100	100	100	100	100	100	0	0	0	0	0	0	0	0	0	0	0	0	0	0	0	0	0	0	0	0	0	0	0	0	16.2791	16.2791	16.2791	16.2791	16.2791
							Pheno_BC3F3s	Gall_Index	0	0	0	0	0	0	0	0	0	0	0	0	0	0	1	0	1	1	3	3	3	0	2	2	2	3	3	1	2	3	3	3	2	2	2	3	0	1	0	0	1
								Root_wt	1.6	3.1	1.3	1	3.7	0.4	1.6	0.3	1.3	0.7	0.3	0.8	3.2	4.3	3.4	2.5	3	4.3	6.4	4.8	4.6	3.1	3.6	4	4.1	5.1	8.9	3.6	4.2	7.1	8.1	2.5	3.6	8.3	5.3	6.4	4.2	5.8	6.2	7.7	4.4
								#Eggs	0	0	0	0	0	0	0	0	0	0	0	0	300	900	0	0	0	0	17400	8100	5400	750	1350	1800	8400	24300	7200	5700	19200	11400	14100	0	12600	4050	1350	4200	0	0	0	450	0
								Galls_g_root	0	0	0	0	0	0	0	0	0	0	0	0	0	0	0.294118	0	0.333333	0.232558	0.46875	0.625	0.652174	0	0.555556	0.5	0.487805	0.588235	0.337079	0.277778	0.47619	0.422535	0.37037	1.2	0.555556	0.240964	0.377358	0.46875	0	0.172414	0	0	0.227273
								Eggs_g_root	0	0	0	0	0	0	0	0	0	0	0	0	93.75	209.302	0	0	0	0	2718.75	1687.5	1173.91	241.935	375	450	2048.78	4764.71	808.989	1583.33	4571.43	1605.63	1740.74	0	3500	487.952	254.717	656.25	0	0	0	58.4416	0
Order base on genetic map	probeset_id	GeneticMap	LG	cM (JoinMap)	Reassigned Pseudomolecule	Reassigned Position	Reassigned Name	KASP markers	Batsten1 Rep1	Batsten1 Rep2	Batsten1 Rep3	Batsten1 Rep4	Batsten1 Rep5	Batsten1 Rep6	Batsten1 Rep7	Batsten1 Rep8	Batsten1 Rep9	Batsten1 Rep10	Batsten1 Rep11	Batsten1 Rep12	5-646-10 Rep1	5-646-10 Rep2	5-646-10 Rep3	5-646-10 Rep4	5-646-10 Rep5	5-646-10 Rep6	5-646-10 Rep7	5-646-10 Rep8	5-646-10 Rep9	5-646-10 Rep10	5-646-10 Rep11	5-646-10 Rep12	13-1014 Rep1	13-1014 Rep2	13-1014 Rep3	13-1014 Rep4	13-1014 Rep5	13-1014 Rep6	13-1014 Rep7	13-1014 Rep8	13-1014 Rep9	13-1014 Rep10	13-1014 Rep11	13-1014 Rep12	TifNV-O/L Rep1	TifNV-O/L Rep2	TifNV-O/L Rep3	TifNV-O/L Rep4	TifNV-O/L Rep5
1	AX-147265635	Sten	A01	0	Aradu.A01	595640	A01_595640_Sten	-	1	1	1	1	1	1	1	1	1	1	1	1	0	0	0	0	0	0	0	0	0	0	0	0	0	0	0	0	0	0	0	0	0	0	0	0	0	0	0	0	0
2	AX-147207750	Sten	A01	7.337	Aradu.A01	785346	A01_785346_Sten	-	1	1	1	1	1	1	1	1	1	1	1	1	0	0	0	0	0	0	0	0	0	0	0	0	0	0	0	0	0	0	0	0	0	0	0	0	0	0	0	0	0
3	AX-147207744	Sten	A01	10.655	Aradu.A01	773107	A01_773107_Sten	-	1	1	1	1	1	1	1	1	1	1	1	1	0	0	0	0	0	0	0	0	0	0	0	0	0	0	0	0	0	0	0	0	0	0	0	0	0	0	0	0	0
4	AX-147207751	Sten	A01	12.227	Aradu.A01	795710	A01_795710_Sten	-	1	1	1	1	1	1	1	1	1	1	1	1	0	0	0	0	0	0	0	0	0	0	0	0	0	0	0	0	0	0	0	0	0	0	0	0	0	0	0	0	0
5	AX-147207741	Sten	A01	14.058	Aradu.A01	748457	A01_748457_Sten	-	1	1	1	1	1	1	1	1	1	1	1	1	0	0	0	0	0	0	0	0	0	0	0	0	0	0	0	0	0	0	0	0	0	0	0	0	0	0	0	0	0
6	AX-147207696	Sten	A01	15.092	Aradu.A01	567530	A01_567530_Sten	-	1	1	1	1	1	1	1	1	1	1	1	1	0	0	0	0	0	0	0	0	0	0	0	0	0	0	0	0	0	0	0	0	0	0	0	0	0	0	0	0	0
7	AX-147207739	Sten	A01	15.605	Aradu.A01	738171	A01_738171_Sten	-	1	1	1	1	1	1	1	1	1	1	1	1	0	0	0	0	0	0	0	0	0	0	0	0	0	0	0	0	0	0	0	0	0	0	0	0	0	0	0	0	0
8	AX-147207768	Sten	A01	18.976	Aradu.A01	922352	A01_922352_Sten	-	1	1	1	1	1	1	1	1	1	1	1	1	0	0	0	0	0	0	0	0	0	0	0	0	0	0	0	0	0	0	0	0	0	0	0	0	0	0	0	0	0
9	AX-147207810	Sten	A01	20.525	Aradu.A01	1117391	A01_1117391_Sten	-	1	1	1	1	1	1	1	1	1	1	1	1	0	0	0	0	0	0	0	0	0	0	0	0	0	0	0	0	0	0	0	0	0	0	0	0	0	0	0	0	0
10	AX-147207796	Sten	A01	22.068	Aradu.A01	1043415	A01_1043415_Sten	-	1	1	1	1	1	1	1	1	1	1	1	1	0	0	0	0	0	0	0	0	0	0	0	0	0	0	0	0	0	0	0	0	0	0	0	0	0	0	0	0	0
11	AX-147207792	Sten	A01	24.035	Aradu.A01	1040768	A01_1040768_Sten	-	1	1	1	1	1	1	1	1	1	1	1	1	0	0	0	0	0	0	0	0	0	0	0	0	0	0	0	0	0	0	0	0	0	0	0	0	0	0	0	0	0
12	AX-147207833	Sten	A01	26.731	Aradu.A01	1231537	A01_1231537_Sten	-	1	1	1	1	1	1	1	1	1	1	1	1	0	0	0	0	0	0	0	0	0	0	0	0	0	0	0	0	0	0	0	0	0	0	0	0	0	0	0	0	0
13	AX-147207859	Sten	A01	29.085	Aradu.A01	1397197	A01_1397197_Sten	-	1	1	1	1	1	1	1	1	1	1	1	1	0	0	0	0	0	0	0	0	0	0	0	0	0	0	0	0	0	0	0	0	0	0	0	0	0	0	0	0	0
14	AX-147207865	Sten	A01	31.231	Aradu.A01	1399658	A01_1399658_Sten	-	1	1	1	1	1	1	1	1	1	1	1	1	0	0	0	0	0	0	0	0	0	0	0	0	0	0	0	0	0	0	0	0	0	0	0	0	0	0	0	0	0
15	AX-147207867	Sten	A01	32.708	Aradu.A01	1427181	A01_1427181_Sten	-	1	1	1	1	1	1	1	1	1	1	1	1	0	0	0	0	0	0	0	0	0	0	0	0	0	0	0	0	0	0	0	0	0	0	0	0	0	0	0	0	0
16	AX-147207869	Sten	A01	34.525	Aradu.A01	1448059	A01_1448059_Sten	-	1	1	1	1	1	1	1	1	1	1	1	1	0	0	0	0	0	0	0	0	0	0	0	0	0	0	0	0	0	0	0	0	0	0	0	0	0	0	0	0	0
17	AX-147207942	Sten	A01	36.779	Aradu.A01	1705064	A01_1705064_Sten	-	1	1	1	1	1	1	1	1	1	1	1	1	0	0	0	0	0	0	0	0	0	0	0	0	0	0	0	0	0	0	0	0	0	0	0	0	0	0	0	0	0
18	AX-147265676	Sten	A01	37.916	Aradu.A01	1665696	A01_1665696_Sten	-	1	1	1	1	1	1	1	1	1	1	1	1	0	0	0	0	0	0	0	0	0	0	0	0	0	0	0	0	0	0	0	0	0	0	0	0	0	0	0	0	0
19	AX-147207949	Sten	A01	39.726	Aradu.A01	1724608	A01_1724608_Sten	-	1	1	1	1	1	1	1	1	1	1	1	1	0	0	0	0	0	0	0	0	0	0	0	0	0	0	0	0	0	0	0	0	0	0	0	0	0	0	0	0	0
20	AX-147207952	Sten	A01	41.081	Aradu.A01	1734212	A01_1734212_Sten	-	1	1	1	1	1	1	1	1	1	1	1	1	0	0	0	0	0	0	0	0	0	0	0	0	0	0	0	0	0	0	0	0	0	0	0	0	0	0	0	0	0
21	AX-147207960	Sten	A01	43.086	Aradu.A01	1777026	A01_1777026_Sten	-	1	1	1	1	1	1	1	1	1	1	1	1	0	0	0	0	0	0	0	0	0	0	0	0	0	0	0	0	0	0	0	0	0	0	0	0	0	0	0	0	0
22	AX-147207989	Sten	A01	44.117	Aradu.A01	1845128	A01_1845128_Sten	-	1	1	1	1	1	1	1	1	1	1	1	1	0	0	0	0	0	0	0	0	0	0	0	0	0	0	0	0	0	0	0	0	0	0	0	0	0	0	0	0	0
23	AX-147207971	Sten	A01	44.383	Aradu.A01	1788137	A01_1788137_Sten	-	1	1	1	1	1	1	1	1	1	1	1	1	0	0	0	0	0	0	0	0	0	0	0	0	0	0	0	0	0	0	0	0	0	0	0	0	0	0	0	0	0
24	AX-147207965	Sten	A01	44.964	Aradu.A01	1783428	A01_1783428_Sten	-	1	1	1	1	1	1	1	1	1	1	1	1	0	0	0	0	0	0	0	0	0	0	0	0	0	0	0	0	0	0	0	0	0	0	0	0	0	0	0	0	0
25	AX-147207985	Sten	A01	45.918	Aradu.A01	1833130	A01_1833130_Sten	-	1	1	1	1	1	1	1	1	1	1	1	1	0	0	0	0	0	0	0	0	0	0	0	0	0	0	0	0	0	0	0	0	0	0	0	0	0	0	0	0	0
26	AX-147208042	Sten	A01	48.401	Aradu.A01	1984932	A01_1984932_Sten	-	1	1	1	1	1	1	1	1	1	1	1	1	0	0	0	0	0	0	0	0	0	0	0	0	0	0	0	0	0	0	0	0	0	0	0	0	0	0	0	0	0
27	AX-147208055	Sten	A01	49.001	Aradu.A01	2010809	A01_2010809_Sten	-	1	1	1	1	1	1	1	1	1	1	1	1	0	0	0	0	0	0	0	0	0	0	0	0	0	0	0	0	0	0	0	0	0	0	0	0	0	0	0	0	0
28	AX-147208027	Sten	A01	49.026	Aradu.A01	1979329	A01_1979329_Sten	-	1	1	1	1	1	1	1	1	1	1	1	1	0	0	0	0	0	0	0	0	0	0	0	0	0	0	0	0	0	0	0	0	0	0	0	0	0	0	0	0	0
29	AX-147208052	Sten	A01	49.556	Aradu.A01	2010272	A01_2010272_Sten	-	1	1	1	1	1	1	1	1	1	1	1	1	0	0	0	0	0	0	0	0	0	0	0	0	0	0	0	0	0	0	0	0	0	0	0	0	0	0	0	0	0
30	AX-147208038	Sten	A01	50.055	Aradu.A01	1984099	A01_1984099_Sten	-	1	1	1	1	1	1	1	1	1	1	1	1	0	0	0	0	0	0	0	0	0	0	0	0	0	0	0	0	0	0	0	0	0	0	0	0	0	0	0	0	0
31	AX-147208012	Sten	A01	50.67	Aradu.A01	1916852	A01_1916852_Sten	-	1	1	1	1	1	1	1	1	1	1	1	1	0	0	0	0	0	0	0	0	0	0	0	0	0	0	0	0	0	0	0	0	0	0	0	0	0	0	0	0	0
32	AX-147208016	Sten	A01	52.149	Aradu.A01	1950993	A01_1950993_Sten	-	1	1	1	1	1	1	1	1	1	1	1	1	0	0	0	0	0	0	0	0	0	0	0	0	0	0	0	0	0	0	0	0	0	0	0	0	0	0	0	0	0
33	AX-147208101	Sten	A01	54.761	Aradu.A01	2278223	A01_2278223_Sten	-	1	1	1	1	1	1	1	1	1	1	1	1	0	0	0	0	0	0	0	0	0	0	0	0	0	0	0	0	0	0	0	0	0	0	0	0	0	0	0	0	0
34	AX-147208105	Sten	A01	55.788	Aradu.A01	2303999	A01_2303999_Sten	-	1	1	1	1	1	1	1	1	1	1	1	1	0	0	0	0	0	0	0	0	0	0	0	0	0	0	0	0	0	0	0	0	0	0	0	0	0	0	0	0	0
35	AX-147208106	Sten	A01	56.981	Aradu.A01	2304266	A01_2304266_Sten	-	1	1	1	1	1	1	1	1	1	1	1	1	0	0	0	0	0	0	0	0	0	0	0	0	0	0	0	0	0	0	0	0	0	0	0	0	0	0	0	0	0
36	AX-147208130	Sten	A01	58.159	Aradu.A01	2434150	A01_2434150_Sten	-	1	1	1	1	1	1	1	1	1	1	1	1	0	0	0	0	0	0	0	0	0	0	0	0	0	0	0	0	0	0	0	0	0	0	0	0	0	0	0	0	0
37	AX-147208131	Sten	A01	58.676	Aradu.A01	2439513	A01_2439513_Sten	-	1	1	1	1	1	1	1	1	1	1	1	1	0	0	0	0	0	0	0	0	0	0	0	0	0	0	0	0	0	0	0	0	0	0	0	0	0	0	0	0	0
38	AX-147208153	Sten	A01	60.386	Aradu.A01	2784796	A01_2784796_Sten	-	1	1	1	1	1	1	1	1	1	1	1	1	0	0	0	0	0	0	0	0	0	0	0	0	0	0	0	0	0	0	0	0	0	0	0	0	0	0	0	0	0
39	AX-147208184	Sten	A01	66.315	Aradu.A01	2897855	A01_2897855_Sten	-	1	1	1	1	1	1	1	1	1	1	1	1	0	0	0	0	0	0	0	0	0	0	0	0	0	0	0	0	0	0	0	0	0	0	0	0	0	0	0	0	0
40	AX-147208224	Sten	A01	68.775	Aradu.A01	3069430	A01_3069430_Sten	-	1	1	1	1	1	1	1	1	1	1	1	1	0	0	0	0	0	0	0	0	0	0	0	0	0	0	0	0	0	0	0	0	0	0	0	0	0	0	0	0	0
41	AX-147265734	Sten	A01	68.784	Aradu.A01	3120188	A01_3120188_Sten	-	1	1	1	1	1	1	1	1	1	1	1	1	0	0	0	0	0	0	0	0	0	0	0	0	0	0	0	0	0	0	0	0	0	0	0	0	0	0	0	0	0
42	AX-147208245	Sten	A01	69.801	Aradu.A01	3120434	A01_3120434_Sten	-	1	1	1	1	1	1	1	1	1	1	1	1	0	0	0	0	0	0	0	0	0	0	0	0	0	0	0	0	0	0	0	0	0	0	0	0	0	0	0	0	0
43	AX-147208217	Sten	A01	70.684	Aradu.A01	3034640	A01_3034640_Sten	-	1	1	1	1	1	1	1	1	1	1	1	1	0	0	0	0	0	0	0	0	0	0	0	0	0	0	0	0	0	0	0	0	0	0	0	0	0	0	0	0	0
44	AX-147208252	Sten	A01	71.859	Aradu.A01	3128533	A01_3128533_Sten	-	1	1	1	1	1	1	1	1	1	1	1	1	0	0	0	0	0	0	0	0	0	0	0	0	0	0	0	0	0	0	0	0	0	0	0	0	0	0	0	0	0
45	AX-147208281	Sten	A01	72.227	Aradu.A01	3173724	A01_3173724_Sten	-	1	1	1	1	1	1	1	1	1	1	1	1	0	0	0	0	0	0	0	0	0	0	0	0	0	0	0	0	0	0	0	0	0	0	0	0	0	0	0	0	0
46	AX-147208277	Sten	A01	73.406	Aradu.A01	3171803	A01_3171803_Sten	-	1	1	1	1	1	1	1	1	1	1	1	1	0	0	0	0	0	0	0	0	0	0	0	0	0	0	0	0	0	0	0	0	0	0	0	0	0	0	0	0	0
47	AX-147208313	Sten	A01	74.438	Aradu.A01	3335170	A01_3335170_Sten	-	1	1	1	1	1	1	1	1	1	1	1	1	0	0	0	0	0	0	0	0	0	0	0	0	0	0	0	0	0	0	0	0	0	0	0	0	0	0	0	0	0
48	AX-147265753	Sten	A01	74.817	Aradu.A01	3335472	A01_3335472_Sten	-	1	1	1	1	1	1	1	1	1	1	1	1	0	0	0	0	0	0	0	0	0	0	0	0	0	0	0	0	0	0	0	0	0	0	0	0	0	0	0	0	0
49	AX-147265751	Sten	A01	75.464	Aradu.A01	3331989	A01_3331989_Sten	-	1	1	1	1	1	1	1	1	1	1	1	1	0	0	0	0	0	0	0	0	0	0	0	0	0	0	0	0	0	0	0	0	0	0	0	0	0	0	0	0	0
50	AX-147208320	Sten	A01	76.75	Aradu.A01	3362317	A01_3362317_Sten	-	1	1	1	1	1	1	1	1	1	1	1	1	0	0	0	0	0	0	0	0	0	0	0	0	0	0	0	0	0	0	0	0	0	0	0	0	0	0	0	0	0
51	AX-147208345	Sten	A01	77.789	Aradu.A01	3438883	A01_3438883_Sten	-	1	1	1	1	1	1	1	1	1	1	1	1	0	0	0	0	0	0	0	0	0	0	0	0	0	0	0	0	0	0	0	0	0	0	0	0	0	0	0	0	0
52	AX-147208366	Sten	A01	78.634	Aradu.A01	3462248	A01_3462248_Sten	-	1	1	1	1	1	1	1	1	1	1	1	1	0	0	0	0	0	0	0	0	0	0	0	0	0	0	0	0	0	0	0	0	0	0	0	0	0	0	0	0	0
53	AX-147208419	Sten	A01	80.332	Aradu.A01	3648316	A01_3648316_Sten	-	1	1	1	1	1	1	1	1	1	1	1	1	0	0	0	0	0	0	0	0	0	0	0	0	0	0	0	0	0	0	0	0	0	0	0	0	0	0	0	0	0
54	AX-147208459	Sten	A01	83.13	Aradu.A01	3857470	A01_3857470_Sten	-	1	1	1	1	1	1	1	1	1	1	1	1	0	0	0	0	0	0	0	0	0	0	0	0	0	0	0	0	0	0	0	0	0	0	0	0	0	0	0	0	0
55	AX-147208462	Sten	A01	84.352	Aradu.A01	3864763	A01_3864763_Sten	-	1	1	1	1	1	1	1	1	1	1	1	1	0	0	0	0	0	0	0	0	0	0	0	0	0	0	0	0	0	0	0	0	0	0	0	0	0	0	0	0	0
56	AX-147208456	Sten	A01	85.57	Aradu.A01	3845309	A01_3845309_Sten	-	1	1	1	1	1	1	1	1	1	1	1	1	0	0	0	0	0	0	0	0	0	0	0	0	0	0	0	0	0	0	0	0	0	0	0	0	0	0	0	0	0
57	AX-147208477	Sten	A01	86.627	Aradu.A01	3947660	A01_3947660_Sten	-	1	1	1	1	1	1	1	1	1	1	1	1	0	0	0	0	0	0	0	0	0	0	0	0	0	0	0	0	0	0	0	0	0	0	0	0	0	0	0	0	0
58	AX-147208481	Sten	A01	88.114	Aradu.A01	3986510	A01_3986510_Sten	-	1	1	1	1	1	1	1	1	1	1	1	1	0	0	0	0	0	0	0	0	0	0	0	0	0	0	0	0	0	0	0	0	0	0	0	0	0	0	0	0	0
59	AX-147208488	Sten	A01	90.374	Aradu.A01	4017783	A01_4017783_Sten	-	1	1	1	1	1	1	1	1	1	1	1	1	0	0	0	0	0	0	0	0	0	0	0	0	0	0	0	0	0	0	0	0	0	0	0	0	0	0	0	0	0
60	AX-147208523	Sten	A01	93.77	Aradu.A01	4143724	A01_4143724_Sten	-	1	1	1	1	1	1	1	1	1	1	1	1	0	0	0	0	0	0	0	0	0	0	0	0	0	0	0	0	0	0	0	0	0	0	0	0	0	0	0	0	0
61	AX-147208570	Sten	A01	100.025	Aradu.A01	4472019	A01_4472019_Sten	-	1	1	1	1	1	1	1	1	1	1	1	1	0	0	0	0	0	0	0	0	0	0	0	0	0	0	0	0	0	0	0	0	0	0	0	0	0	0	0	0	0
62	AX-147208611	Sten	A01	101.299	Aradu.A01	4645186	A01_4645186_Sten	-	1	1	1	1	1	1	1	1	1	1	1	1	0	0	0	0	0	0	0	0	0	0	0	0	0	0	0	0	0	0	0	0	0	0	0	0	0	0	0	0	0
63	AX-147208614	Sten	A01	104.238	Aradu.A01	4678382	A01_4678382_Sten	-	1	1	1	1	1	1	1	1	1	1	1	1	0	0	0	0	0	0	0	0	0	0	0	0	0	0	0	0	0	0	0	0	0	0	0	0	0	0	0	0	0
64	AX-147208650	Sten	A01	105.71	Aradu.A01	4901872	A01_4901872_Sten	-	1	1	1	1	1	1	1	1	1	1	1	1	0	0	0	0	0	0	0	0	0	0	0	0	0	0	0	0	0	0	0	0	0	0	0	0	0	0	0	0	0
65	AX-147208681	Sten	A01	107.498	Aradu.A01	4956444	A01_4956444_Sten	-	1	1	1	1	1	1	1	1	1	1	1	1	0	0	0	0	0	0	0	0	0	0	0	0	0	0	0	0	0	0	0	0	0	0	0	0	0	0	0	0	0
66	AX-147208686	Sten	A01	108.026	Aradu.A01	4971720	A01_4971720_Sten	-	1	1	1	1	1	1	1	1	1	1	1	1	0	0	0	0	0	0	0	0	0	0	0	0	0	0	0	0	0	0	0	0	0	0	0	0	0	0	0	0	0
67	AX-147208687	Sten	A01	108.283	Aradu.A01	4971756	A01_4971756_Sten	-	1	1	1	1	1	1	1	1	1	1	1	1	0	0	0	0	0	0	0	0	0	0	0	0	0	0	0	0	0	0	0	0	0	0	0	0	0	0	0	0	0
68	AX-147208809	Sten	A01	111.755	Aradu.A01	5589971	A01_5589971_Sten	-	1	1	1	1	1	1	1	1	1	1	1	1	0	0	0	0	0	0	0	0	0	0	0	0	0	0	0	0	0	0	0	0	0	0	0	0	0	0	0	0	0
69	AX-147208902	Sten	A01	113.552	Aradu.A01	6200658	A01_6200658_Sten	-	1	1	1	1	1	1	1	1	1	1	1	1	0	0	0	0	0	0	0	0	0	0	0	0	0	0	0	0	0	0	0	0	0	0	0	0	0	0	0	0	0
70	AX-147208929	Sten	A01	117.46	Aradu.A01	6337729	A01_6337729_Sten	-	1	1	1	1	1	1	1	1	1	1	1	1	0	0	0	0	0	0	0	0	0	0	0	0	0	0	0	0	0	0	0	0	0	0	0	0	0	0	0	0	0
71	AX-147208981	Sten	A01	119.792	Aradu.A01	6679326	A01_6679326_Sten	-	1	1	1	1	1	1	1	1	1	1	1	1	0	0	0	0	0	0	0	0	0	0	0	0	0	0	0	0	0	0	0	0	0	0	0	0	0	0	0	0	0
72	AX-147208980	Sten	A01	120.008	Aradu.A01	6679084	A01_6679084_Sten	-	1	1	1	1	1	1	1	1	1	1	1	1	0	0	0	0	0	0	0	0	0	0	0	0	0	0	0	0	0	0	0	0	0	0	0	0	0	0	0	0	0
73	AX-147208979	Sten	A01	120.068	Aradu.A01	6679029	A01_6679029_Sten	-	1	1	1	1	1	1	1	1	1	1	1	1	0	0	0	0	0	0	0	0	0	0	0	0	0	0	0	0	0	0	0	0	0	0	0	0	0	0	0	0	0
74	AX-147209005	Sten	A01	120.865	Aradu.A01	6797615	A01_6797615_Sten	-	1	1	1	1	1	1	1	1	1	1	1	1	0	0	0	0	0	0	0	0	0	0	0	0	0	0	0	0	0	0	0	0	0	0	0	0	0	0	0	0	0
75	AX-147209001	Sten	A01	122.645	Aradu.A01	6794484	A01_6794484_Sten	-	1	1	1	1	1	1	1	1	1	1	1	1	0	0	0	0	0	0	0	0	0	0	0	0	0	0	0	0	0	0	0	0	0	0	0	0	0	0	0	0	0
76	AX-147209007	Sten	A01	123.417	Aradu.A01	6797918	A01_6797918_Sten	-	1	1	1	1	1	1	1	1	1	1	1	1	0	0	0	0	0	0	0	0	0	0	0	0	0	0	0	0	0	0	0	0	0	0	0	0	0	0	0	0	0
77	AX-147209047	Sten	A01	125.237	Aradu.A01	7002818	A01_7002818_Sten	-	1	1	1	1	1	1	1	1	1	1	1	1	0	0	0	0	0	0	0	0	0	0	0	0	0	0	0	0	0	0	0	0	0	0	0	0	0	0	0	0	0
78	AX-147209077	Sten	A01	128.102	Aradu.A01	7260675	A01_7260675_Sten	-	1	1	1	1	1	1	1	1	1	1	1	1	0	0	0	0	0	0	0	0	0	0	0	0	0	0	0	0	0	0	0	0	0	0	0	0	0	0	0	0	0
79	AX-147209151	Sten	A01	131.826	Aradu.A01	7778025	A01_7778025_Sten	-	1	1	1	1	1	1	1	1	1	1	1	1	0	0	0	0	0	0	0	0	0	0	0	0	0	0	0	0	0	0	0	0	0	0	0	0	0	0	0	0	0
80	AX-147209175	Sten	A01	132.984	Aradu.A01	7840794	A01_7840794_Sten	-	1	1	1	1	1	1	1	1	1	1	1	1	0	0	0	0	0	0	0	0	0	0	0	0	0	0	0	0	0	0	0	0	0	0	0	0	0	0	0	0	0
81	AX-147209153	Sten	A01	133.627	Aradu.A01	7778389	A01_7778389_Sten	-	1	1	1	1	1	1	1	1	1	1	1	1	0	0	0	0	0	0	0	0	0	0	0	0	0	0	0	0	0	0	0	0	0	0	0	0	0	0	0	0	0
82	AX-147209197	Sten	A01	134.398	Aradu.A01	8070919	A01_8070919_Sten	-	1	1	1	1	1	1	1	1	1	1	1	1	0	0	0	0	0	0	0	0	0	0	0	0	0	0	0	0	0	0	0	0	0	0	0	0	0	0	0	0	0
83	AX-147210038	Sten	A01	135.683	Aradu.A01	11922479	A01_11922479_Sten	-	1	1	1	1	1	1	1	1	1	1	1	1	0	0	0	0	0	0	0	0	0	0	0	0	0	0	0	0	0	0	0	0	0	0	0	0	0	0	0	0	0
84	AX-147210045	Sten	A01	135.94	Aradu.A01	11971012	A01_11971012_Sten	-	1	1	1	1	1	1	1	1	1	1	1	1	0	0	0	0	0	0	0	0	0	0	0	0	0	0	0	0	0	0	0	0	0	0	0	0	0	0	0	0	0
85	AX-147210055	Sten	A01	136.196	Aradu.A01	12011768	A01_12011768_Sten	-	1	1	1	1	1	1	1	1	1	1	1	1	0	0	0	0	0	0	0	0	0	0	0	0	0	0	0	0	0	0	0	0	0	0	0	0	0	0	0	0	0
86	AX-147209973	Sten	A01	136.709	Aradu.A01	11617268	A01_11617268_Sten	-	1	1	1	1	1	1	1	1	1	1	1	1	0	0	0	0	0	0	0	0	0	0	0	0	0	0	0	0	0	0	0	0	0	0	0	0	0	0	0	0	0
87	AX-147210007	Sten	A01	136.726	Aradu.A01	11796164	A01_11796164_Sten	-	1	1	1	1	1	1	1	1	1	1	1	1	0	0	0	0	0	0	0	0	0	0	0	0	0	0	0	0	0	0	0	0	0	0	0	0	0	0	0	0	0
88	AX-147237395	Sten	A01	137.222	Aradu.A01	11812741	A01_11812741_Sten	-	1	1	1	1	1	1	1	1	1	1	1	1	0	0	0	0	0	0	0	0	0	0	0	0	0	0	0	0	0	0	0	0	0	0	0	0	0	0	0	0	0
89	AX-147209963	Sten	A01	137.733	Aradu.A01	11604414	A01_11604414_Sten	-	1	1	1	1	1	1	1	1	1	1	1	1	0	0	0	0	0	0	0	0	0	0	0	0	0	0	0	0	0	0	0	0	0	0	0	0	0	0	0	0	0
90	AX-147209959	Sten	A01	138.508	Aradu.A01	11416797	A01_11416797_Sten	-	1	1	1	1	1	1	1	1	1	1	1	1	0	0	0	0	0	0	0	0	0	0	0	0	0	0	0	0	0	0	0	0	0	0	0	0	0	0	0	0	0
91	AX-147209957	Sten	A01	138.764	Aradu.A01	11401844	A01_11401844_Sten	-	1	1	1	1	1	1	1	1	1	1	1	1	0	0	0	0	0	0	0	0	0	0	0	0	0	0	0	0	0	0	0	0	0	0	0	0	0	0	0	0	0
92	AX-147209909	Sten	A01	140.471	Aradu.A01	11117619	A01_11117619_Sten	-	1	1	1	1	1	1	1	1	1	1	1	1	0	0	0	0	0	0	0	0	0	0	0	0	0	0	0	0	0	0	0	0	0	0	0	0	0	0	0	0	0
93	AX-147209871	Sten	A01	141.762	Aradu.A01	10877830	A01_10877830_Sten	-	1	1	1	1	1	1	1	1	1	1	1	1	0	0	0	0	0	0	0	0	0	0	0	0	0	0	0	0	0	0	0	0	0	0	0	0	0	0	0	0	0
94	AX-147209768	Sten	A01	142.581	Aradu.A01	10400343	A01_10400343_Sten	-	1	1	1	1	1	1	1	1	1	1	1	1	0	0	0	0	0	0	0	0	0	0	0	0	0	0	0	0	0	0	0	0	0	0	0	0	0	0	0	0	0
95	AX-147209746	Sten	A01	143.099	Aradu.A01	10363537	A01_10363537_Sten	-	1	1	1	1	1	1	1	1	1	1	1	1	0	0	0	0	0	0	0	0	0	0	0	0	0	0	0	0	0	0	0	0	0	0	0	0	0	0	0	0	0
96	AX-147209744	Sten	A01	143.615	Aradu.A01	10362840	A01_10362840_Sten	-	1	1	1	1	1	1	1	1	1	1	1	1	0	0	0	0	0	0	0	0	0	0	0	0	0	0	0	0	0	0	0	0	0	0	0	0	0	0	0	0	0
97	AX-147209734	Sten	A01	144.154	Aradu.A01	10355299	A01_10355299_Sten	-	1	1	1	1	1	1	1	1	1	1	1	1	0	0	0	0	0	0	0	0	0	0	0	0	0	0	0	0	0	0	0	0	0	0	0	0	0	0	0	0	0
98	AX-147209529	Sten	A01	150.555	Aradu.A01	9601661	A01_9601661_Sten	-	1	1	1	1	1	1	1	1	1	1	1	1	0	0	0	0	0	0	0	0	0	0	0	0	0	0	0	0	0	0	0	0	0	0	0	0	0	0	0	0	0
99	AX-147209562	Sten	A01	154.052	Aradu.A01	9683595	A01_9683595_Sten	-	1	1	1	1	1	1	1	1	1	1	1	1	0	0	0	0	0	0	0	0	0	0	0	0	0	0	0	0	0	0	0	0	0	0	0	0	0	0	0	0	0
100	AX-147209535	Sten	A01	160.782	Aradu.A01	9616542	A01_9616542_Sten	-	1	1	1	1	1	1	1	1	1	1	1	1	0	0	0	0	0	0	0	0	0	0	0	0	0	0	0	0	0	0	0	0	0	0	0	0	0	0	0	0	0
101	AX-147209476	Sten	A01	169.41	Aradu.A01	9389221	A01_9389221_Sten	-	1	1	1	1	1	1	1	1	1	1	1	1	0	0	0	0	0	0	0	0	0	0	0	0	0	0	0	0	0	0	0	0	0	0	0	0	0	0	0	0	0
102	AX-147210087	Sten	A01	173.09	Aradu.A01	12274662	A01_12274662_Sten	-	1	1	1	1	1	1	1	1	1	1	1	1	0	0	0	0	0	0	0	0	0	0	0	0	0	0	0	0	0	0	0	0	0	0	0	0	0	0	0	0	0
103	AX-147210176	Sten	A01	179.169	Aradu.A01	14044091	A01_14044091_Sten	-	1	1	1	1	1	1	1	1	1	1	1	1	0	0	0	0	0	0	0	0	0	0	0	0	0	0	0	0	0	0	0	0	0	0	0	0	0	0	0	0	0
104	AX-147210198	Sten	A01	179.73	Aradu.A01	14652715	A01_14652715_Sten	-	1	1	1	1	1	1	1	1	1	1	1	1	0	0	0	0	0	0	0	0	0	0	0	0	0	0	0	0	0	0	0	0	0	0	0	0	0	0	0	0	0
105	AX-147210213	Sten	A01	179.986	Aradu.A01	14897407	A01_14897407_Sten	-	1	1	1	1	1	1	1	1	1	1	1	1	0	0	0	0	0	0	0	0	0	0	0	0	0	0	0	0	0	0	0	0	0	0	0	0	0	0	0	0	0
106	AX-147210224	Sten	A01	181.019	Aradu.A01	15260506	A01_15260506_Sten	-	1	1	1	1	1	1	1	1	1	1	1	1	0	0	0	0	0	0	0	0	0	0	0	0	0	0	0	0	0	0	0	0	0	0	0	0	0	0	0	0	0
107	AX-147210114	Sten	A01	183.62	Aradu.A01	12593839	A01_12593839_Sten	-	1	1	1	1	1	1	1	1	1	1	1	1	0	0	0	0	0	0	0	0	0	0	0	0	0	0	0	0	0	0	0	0	0	0	0	0	0	0	0	0	0
108	AX-147210119	Sten	A01	183.62	Aradu.A01	12610918	A01_12610918_Sten	-	1	1	1	1	1	1	1	1	1	1	1	1	0	0	0	0	0	0	0	0	0	0	0	0	0	0	0	0	0	0	0	0	0	0	0	0	0	0	0	0	0
109	AX-147210375	Sten	A01	184.392	Aradu.A01	19206589	A01_19206589_Sten	-	1	1	1	1	1	1	1	1	1	1	1	1	0	0	0	0	0	0	0	0	0	0	0	0	0	0	0	0	0	0	0	0	0	0	0	0	0	0	0	0	0
110	AX-147210408	Sten	A01	185.779	Aradu.A01	19878466	A01_19878466_Sten	-	1	1	1	1	1	1	1	1	1	1	1	1	0	0	0	0	0	0	0	0	0	0	0	0	0	0	0	0	0	0	0	0	0	0	0	0	0	0	0	0	0
111	AX-147210432	Sten	A01	188.266	Aradu.A01	21307983	A01_21307983_Sten	-	1	1	1	1	1	1	1	1	1	1	1	1	0	0	0	0	0	0	0	0	0	0	0	0	0	0	0	0	0	0	0	0	0	0	0	0	0	0	0	0	0
112	AX-147210510	Sten	A01	190.969	Aradu.A01	23821551	A01_23821551_Sten	-	1	1	1	1	1	1	1	1	1	1	1	1	0	0	0	0	0	0	0	0	0	0	0	0	0	0	0	0	0	0	0	0	0	0	0	0	0	0	0	0	0
113	AX-147210595	Sten	A01	192.529	Aradu.A01	28149031	A01_28149031_Sten	-	1	1	1	1	1	1	1	1	1	1	1	1	0	0	0	0	0	0	0	0	0	0	0	0	0	0	0	0	0	0	0	0	0	0	0	0	0	0	0	0	0
114	AX-147210648	Sten	A01	193.158	Aradu.A01	29419297	A01_29419297_Sten	-	1	1	1	1	1	1	1	1	1	1	1	1	0	0	0	0	0	0	0	0	0	0	0	0	0	0	0	0	0	0	0	0	0	0	0	0	0	0	0	0	0
115	AX-147210754	Sten	A01	193.669	Aradu.A01	32558513	A01_32558513_Sten	-	1	1	1	1	1	1	1	1	1	1	1	1	0	0	0	0	0	0	0	0	0	0	0	0	0	0	0	0	0	0	0	0	0	0	0	0	0	0	0	0	0
116	AX-147210685	Sten	A01	194.44	Aradu.A01	30700040	A01_30700040_Sten	-	1	1	1	1	1	1	1	1	1	1	1	1	0	0	0	0	0	0	0	0	0	0	0	0	0	0	0	0	0	0	0	0	0	0	0	0	0	0	0	0	0
117	AX-147211069	Sten	A01	198.067	Aradu.A01	44307659	A01_44307659_Sten	-	1	1	1	1	1	1	1	1	1	1	1	1	0	0	0	0	0	0	0	0	0	0	0	0	0	0	0	0	0	0	0	0	0	0	0	0	0	0	0	0	0
118	AX-147211197	Sten	A01	203.189	Aradu.A01	50292886	A01_50292886_Sten	-	1	1	1	1	1	1	1	1	1	1	1	1	0	0	0	0	0	0	0	0	0	0	0	0	0	0	0	0	0	0	0	0	0	0	0	0	0	0	0	0	0
119	AX-147211204	Sten	A01	203.559	Aradu.A01	50383263	A01_50383263_Sten	-	1	1	1	1	1	1	1	1	1	1	1	1	0	0	0	0	0	0	0	0	0	0	0	0	0	0	0	0	0	0	0	0	0	0	0	0	0	0	0	0	0
120	AX-147211413	Sten	A01	204.586	Aradu.A01	62682605	A01_62682605_Sten	-	1	1	1	1	1	1	1	1	1	1	1	1	0	0	0	0	0	0	0	0	0	0	0	0	0	0	0	0	0	0	0	0	0	0	0	0	0	0	0	0	0
121	AX-147211193	Sten	A01	204.586	Aradu.A01	50260433	A01_50260433_Sten	-	1	1	1	1	1	1	1	1	1	1	1	1	0	0	0	0	0	0	0	0	0	0	0	0	0	0	0	0	0	0	0	0	0	0	0	0	0	0	0	0	0
122	AX-147211190	Sten	A01	204.966	Aradu.A01	50181195	A01_50181195_Sten	-	1	1	1	1	1	1	1	1	1	1	1	1	0	0	0	0	0	0	0	0	0	0	0	0	0	0	0	0	0	0	0	0	0	0	0	0	0	0	0	0	0
123	AX-147211192	Sten	A01	205.354	Aradu.A01	50259692	A01_50259692_Sten	-	1	1	1	1	1	1	1	1	1	1	1	1	0	0	0	0	0	0	0	0	0	0	0	0	0	0	0	0	0	0	0	0	0	0	0	0	0	0	0	0	0
124	AX-147211171	Sten	A01	205.355	Aradu.A01	49885303	A01_49885303_Sten	-	1	1	1	1	1	1	1	1	1	1	1	1	0	0	0	0	0	0	0	0	0	0	0	0	0	0	0	0	0	0	0	0	0	0	0	0	0	0	0	0	0
125	AX-147211616	Sten	A01	207.156	Aradu.A01	85136940	A01_85136940_Sten	-	1	1	1	1	1	1	1	1	1	1	1	1	0	0	0	0	0	0	0	0	0	0	0	0	0	0	0	0	0	0	0	0	0	0	0	0	0	0	0	0	0
126	AX-147211516	Sten	A01	207.431	Aradu.A01	70251849	A01_70251849_Sten	-	1	1	1	1	1	1	1	1	1	1	1	1	0	0	0	0	0	0	0	0	0	0	0	0	0	0	0	0	0	0	0	0	0	0	0	0	0	0	0	0	0
127	AX-147211655	Sten	A01	210.871	Aradu.A01	89685851	A01_89685851_Sten	-	1	1	1	1	1	1	1	1	1	1	1	1	0	0	0	0	0	0	0	0	0	0	0	0	0	0	0	0	0	0	0	0	0	0	0	0	0	0	0	0	0
128	AX-147211698	Sten	A01	215.624	Aradu.A01	91743419	A01_91743419_Sten	-	1	1	1	1	1	1	1	1	1	1	1	1	0	0	0	0	0	0	0	0	0	0	0	0	0	0	0	0	0	0	0	0	0	0	0	0	0	0	0	0	0
129	AX-147211718	Sten	A01	220.619	Aradu.A01	92596134	A01_92596134_Sten	-	1	1	1	1	1	1	1	1	1	1	1	1	0	0	0	0	0	0	0	0	0	0	0	0	0	0	0	0	0	0	0	0	0	0	0	0	0	0	0	0	0
130	AX-147211790	Sten	A01	232.525	Aradu.A01	94844203	A01_94844203_Sten	-	1	1	1	1	1	1	1	1	1	1	1	1	0	0	0	0	0	0	0	0	0	0	0	0	0	0	0	0	0	0	0	0	0	0	0	0	0	0	0	0	0
131	AX-147211814	Sten	A01	234.266	Aradu.A01	95704657	A01_95704657_Sten	-	1	1	1	1	1	1	1	1	1	1	1	1	0	0	0	0	0	0	0	0	0	0	0	0	0	0	0	0	0	0	0	0	0	0	0	0	0	0	0	0	0
132	AX-147211860	Sten	A01	240.037	Aradu.A01	97205940	A01_97205940_Sten	-	1	1	1	1	1	1	1	1	1	1	1	1	0	0	0	0	0	0	0	0	0	0	0	0	0	0	0	0	0	0	0	0	0	0	0	0	0	0	0	0	0
133	AX-147211886	Sten	A01	245.244	Aradu.A01	98852433	A01_98852433_Sten	-	1	1	1	1	1	1	1	1	1	1	1	1	0	0	0	0	0	0	0	0	0	0	0	0	0	0	0	0	0	0	0	0	0	0	0	0	0	0	0	0	0
134	AX-147211932	Sten	A01	257.732	Aradu.A01	100479409	A01_100479409_Sten	-	1	1	1	1	1	1	1	1	1	1	1	1	0	0	0	0	0	0	0	0	0	0	0	0	0	0	0	0	0	0	0	0	0	0	0	0	0	0	0	0	0
135	AX-147211929	Sten	A01	257.733	Aradu.A01	100451974	A01_100451974_Sten	-	1	1	1	1	1	1	1	1	1	1	1	1	0	0	0	0	0	0	0	0	0	0	0	0	0	0	0	0	0	0	0	0	0	0	0	0	0	0	0	0	0
136	AX-147211962	Sten	A01	260.18	Aradu.A01	101270428	A01_101270428_Sten	-	1	1	1	1	1	1	1	1	1	1	1	1	0	0	0	0	0	0	0	0	0	0	0	0	0	0	0	0	0	0	0	0	0	0	0	0	0	0	0	0	0
137	AX-147211986	Sten	A01	266.331	Aradu.A01	102053529	A01_102053529_Sten	-	1	1	1	1	1	1	1	1	1	1	1	1	0	0	0	0	0	0	0	0	0	0	0	0	0	0	0	0	0	0	0	0	0	0	0	0	0	0	0	0	0
138	AX-147211994	Sten	A01	268.551	Aradu.A01	102165459	A01_102165459_Sten	-	1	1	1	1	1	1	1	1	1	1	1	1	0	0	0	0	0	0	0	0	0	0	0	0	0	0	0	0	0	0	0	0	0	0	0	0	0	0	0	0	0
139	AX-147212014	Sten	A01	274.821	Aradu.A01	102837904	A01_102837904_Sten	-	1	1	1	1	1	1	1	1	1	1	1	1	0	0	0	0	0	0	0	0	0	0	0	0	0	0	0	0	0	0	0	0	0	0	0	0	0	0	0	0	0
140	AX-147212041	Sten	A01	281.979	Aradu.A01	104077042	A01_104077042_Sten	-	1	1	1	1	1	1	1	1	1	1	1	1	0	0	0	0	0	0	0	0	0	0	0	0	0	0	0	0	0	0	0	0	0	0	0	0	0	0	0	0	0
141	AX-147212094	Sten	A01	290.558	Aradu.A01	106856793	A01_106856793_Sten	-	1	1	1	1	1	1	1	1	1	1	1	1	0	0	0	0	0	0	0	0	0	0	0	0	0	0	0	0	0	0	0	0	0	0	0	0	0	0	0	0	0
142	AX-147260387	Sten	A02	11.649	Aradu.A02	524317	A02_524317_Sten	-	1	1	1	1	1	1	1	1	1	1	1	1	0	0	0	0	0	0	0	0	0	0	0	0	0	0	0	0	0	0	0	0	0	0	0	0	0	0	0	0	0
143	AX-147212253	Sten	A02	17.219	Aradu.A02	665048	A02_665048_Sten	-	1	1	1	1	1	1	1	1	1	1	1	1	0	0	0	0	0	0	0	0	0	0	0	0	0	0	0	0	0	0	0	0	0	0	0	0	0	0	0	0	0
144	AX-147212220	Sten	A02	19.409	Aradu.A02	529301	A02_529301_Sten	-	1	1	1	1	1	1	1	1	1	1	1	1	0	0	0	0	0	0	0	0	0	0	0	0	0	0	0	0	0	0	0	0	0	0	0	0	0	0	0	0	0
145	AX-147212320	Sten	A02	37.709	Aradu.A02	805196	A02_805196_Sten	-	1	1	1	1	1	1	1	1	1	1	1	1	0	0	0	0	0	0	0	0	0	0	0	0	0	0	0	0	0	0	0	0	0	0	0	0	0	0	0	0	0
146	AX-147212409	Sten	A02	49.645	Aradu.A02	1180998	A02_1180998_Sten	-	1	1	1	1	1	1	1	1	1	1	1	1	0	0	0	0	0	0	0	0	0	0	0	0	0	0	0	0	0	0	0	0	0	0	0	0	0	0	0	0	0
147	AX-147212463	Sten	A02	77.268	Aradu.A02	1333411	A02_1333411_Sten	-	1	1	1	1	1	1	1	1	1	1	1	1	0	0	0	0	0	0	0	0	0	0	0	0	0	0	0	0	0	0	0	0	0	0	0	0	0	0	0	0	0
148	AX-147240118	Sten	A02	86.226	Aradu.A02	2483118	A02_2483118_Sten	-	1	1	1	1	1	1	1	1	1	1	1	1	0	0	0	0	0	0	0	0	0	0	0	0	0	0	0	0	0	0	0	0	0	0	0	0	0	0	0	0	0
149	AX-147212778	Sten	A02	100.153	Aradu.A02	3001420	A02_3001420_Sten	-	1	1	1	1	1	1	1	1	1	1	1	1	0	0	0	0	0	0	0	0	0	0	0	0	0	0	0	0	0	0	0	0	0	0	0	0	0	0	0	0	0
150	AX-147212672	Sten	A02	109.905	Aradu.A02	2595255	A02_2595255_Sten	-	1	1	1	1	1	1	1	1	1	1	1	1	0	0	0	0	0	0	0	0	0	0	0	0	0	0	0	0	0	0	0	0	0	0	0	0	0	0	0	0	0
151	AX-147212669	Sten	A02	110.889	Aradu.A02	2594478	A02_2594478_Sten	-	1	1	1	1	1	1	1	1	1	1	1	1	0	0	0	0	0	0	0	0	0	0	0	0	0	0	0	0	0	0	0	0	0	0	0	0	0	0	0	0	0
152	AX-147212687	Sten	A02	112.795	Aradu.A02	2640814	A02_2640814_Sten	-	1	1	1	1	1	1	1	1	1	1	1	1	0	0	0	0	0	0	0	0	0	0	0	0	0	0	0	0	0	0	0	0	0	0	0	0	0	0	0	0	0
153	AX-147240219	Sten	A02	133.047	Aradu.A02	2825603	A02_2825603_Sten	-	1	1	1	1	1	1	1	1	1	1	1	1	0	0	0	0	0	0	0	0	0	0	0	0	0	0	0	0	0	0	0	0	0	0	0	0	0	0	0	0	0
154	AX-147212689	Sten	A02	136.362	Aradu.A02	2641024	A02_2641024_Sten	-	1	1	1	1	1	1	1	1	1	1	1	1	0	0	0	0	0	0	0	0	0	0	0	0	0	0	0	0	0	0	0	0	0	0	0	0	0	0	0	0	0
155	AX-147212952	Sten	A02	164.431	Aradu.A02	4883639	A02_4883639_Sten	-	1	1	1	1	1	1	1	1	1	1	1	1	0	0	0	0	0	0	0	0	0	0	0	0	0	0	0	0	0	0	0	0	0	0	0	0	0	0	0	0	0
156	AX-147212940	Sten	A02	166.173	Aradu.A02	4851345	A02_4851345_Sten	-	1	1	1	1	1	1	1	1	1	1	1	1	0	0	0	0	0	0	0	0	0	0	0	0	0	0	0	0	0	0	0	0	0	0	0	0	0	0	0	0	0
157	AX-147240547	Sten	A02	168.117	Aradu.A02	4869257	A02_4869257_Sten	-	1	1	1	1	1	1	1	1	1	1	1	1	0	0	0	0	0	0	0	0	0	0	0	0	0	0	0	0	0	0	0	0	0	0	0	0	0	0	0	0	0
158	AX-147212981	Sten	A02	170.318	Aradu.A02	5238703	A02_5238703_Sten	-	1	1	1	1	1	1	1	1	1	1	1	1	0	0	0	0	0	0	0	0	0	0	0	0	0	0	0	0	0	0	0	0	0	0	0	0	0	0	0	0	0
159	AX-147212990	Sten	A02	171.303	Aradu.A02	5270226	A02_5270226_Sten	-	1	1	1	1	1	1	1	1	1	1	1	1	0	0	0	0	0	0	0	0	0	0	0	0	0	0	0	0	0	0	0	0	0	0	0	0	0	0	0	0	0
160	AX-147212998	Sten	A02	174.624	Aradu.A02	5454619	A02_5454619_Sten	-	1	1	1	1	1	1	1	1	1	1	1	1	0	0	0	0	0	0	0	0	0	0	0	0	0	0	0	0	0	0	0	0	0	0	0	0	0	0	0	0	0
161	AX-147257682	Sten	A02	180.148	Aradu.A02	5782865	A02_5782865_Sten	-	1	1	1	1	1	1	1	1	1	1	1	1	0	0	0	0	0	0	0	0	0	0	0	0	0	0	0	0	0	0	0	0	0	0	0	0	0	0	0	0	0
162	AX-147213155	Sten	A02	187.217	Aradu.A02	6827826	A02_6827826_Sten	-	1	1	1	1	1	1	1	1	1	1	1	1	0	0	0	0	0	0	0	0	0	0	0	0	0	0	0	0	0	0	0	0	0	0	0	0	0	0	0	0	0
163	AX-147213146	Sten	A02	188.225	Aradu.A02	6593512	A02_6593512_Sten	-	1	1	1	1	1	1	1	1	1	1	1	1	0	0	0	0	0	0	0	0	0	0	0	0	0	0	0	0	0	0	0	0	0	0	0	0	0	0	0	0	0
164	AX-147213317	Sten	A02	210.729	Aradu.A02	9782639	A02_9782639_Sten	-	1	1	1	1	1	1	1	1	1	1	1	1	0	0	0	0	0	0	0	0	0	0	0	0	0	0	0	0	0	0	0	0	0	0	0	0	0	0	0	0	0
165	AX-147213328	Sten	A02	211.386	Aradu.A02	10054069	A02_10054069_Sten	-	1	1	1	1	1	1	1	1	1	1	1	1	0	0	0	0	0	0	0	0	0	0	0	0	0	0	0	0	0	0	0	0	0	0	0	0	0	0	0	0	0
166	AX-147213355	Sten	A02	211.663	Aradu.A02	10711674	A02_10711674_Sten	-	1	1	1	1	1	1	1	1	1	1	1	1	0	0	0	0	0	0	0	0	0	0	0	0	0	0	0	0	0	0	0	0	0	0	0	0	0	0	0	0	0
167	AX-147213533	Sten	A02	218.467	Aradu.A02	18984854	A02_18984854_Sten	-	1	1	1	1	1	1	1	1	1	1	1	1	0	0	0	0	0	0	0	0	0	0	0	0	0	0	0	0	0	0	0	0	0	0	0	0	0	0	0	0	0
168	AX-147213537	Sten	A02	218.494	Aradu.A02	19123530	A02_19123530_Sten	-	1	1	1	1	1	1	1	1	1	1	1	1	0	0	0	0	0	0	0	0	0	0	0	0	0	0	0	0	0	0	0	0	0	0	0	0	0	0	0	0	0
169	AX-147213736	Sten	A02	220.944	Aradu.A02	43374948	A02_43374948_Sten	-	1	1	1	1	1	1	1	1	1	1	1	1	0	0	0	0	0	0	0	0	0	0	0	0	0	0	0	0	0	0	0	0	0	0	0	0	0	0	0	0	0
170	AX-147213789	Sten	A02	222.062	Aradu.A02	52237448	A02_52237448_Sten	-	1	1	1	1	1	1	1	1	1	1	1	1	0	0	0	0	0	0	0	0	0	0	0	0	0	0	0	0	0	0	0	0	0	0	0	0	0	0	0	0	0
171	AX-147213604	Sten	A02	224.627	Aradu.A02	25951674	A02_25951674_Sten	-	1	1	1	1	1	1	1	1	1	1	1	1	0	0	0	0	0	0	0	0	0	0	0	0	0	0	0	0	0	0	0	0	0	0	0	0	0	0	0	0	0
172	AX-147213756	Sten	A02	226.608	Aradu.A02	47309222	A02_47309222_Sten	-	1	1	1	1	1	1	1	1	1	1	1	1	0	0	0	0	0	0	0	0	0	0	0	0	0	0	0	0	0	0	0	0	0	0	0	0	0	0	0	0	0
173	AX-147213631	Sten	A02	229.304	Aradu.A02	28574740	A02_28574740_Sten	-	1	1	1	1	1	1	1	1	1	1	1	1	0	0	0	0	0	0	0	0	0	0	0	0	0	0	0	0	0	0	0	0	0	0	0	0	0	0	0	0	0
174	AX-147213719	Sten	A02	230.834	Aradu.A02	42029329	A02_42029329_Sten	-	1	1	1	1	1	1	1	1	1	1	1	1	0	0	0	0	0	0	0	0	0	0	0	0	0	0	0	0	0	0	0	0	0	0	0	0	0	0	0	0	0
175	AX-147213617	Sten	A02	232.09	Aradu.A02	28328466	A02_28328466_Sten	-	1	1	1	1	1	1	1	1	1	1	1	1	0	0	0	0	0	0	0	0	0	0	0	0	0	0	0	0	0	0	0	0	0	0	0	0	0	0	0	0	0
176	AX-147213949	Sten	A02	234.149	Aradu.A02	64315367	A02_64315367_Sten	-	1	1	1	1	1	1	1	1	1	1	1	1	0	0	0	0	0	0	0	0	0	0	0	0	0	0	0	0	0	0	0	0	0	0	0	0	0	0	0	0	0
177	AX-147213981	Sten	A02	236.468	Aradu.A02	66368426	A02_66368426_Sten	-	1	1	1	1	1	1	1	1	1	1	1	1	0	0	0	0	0	0	0	0	0	0	0	0	0	0	0	0	0	0	0	0	0	0	0	0	0	0	0	0	0
178	AX-147214234	Sten	A02	240.719	Aradu.A02	78187923	A02_78187923_Sten	-	1	1	1	1	1	1	1	1	1	1	1	1	0	0	0	0	0	0	0	0	0	0	0	0	0	0	0	0	0	0	0	0	0	0	0	0	0	0	0	0	0
179	AX-147214185	Sten	A02	242.253	Aradu.A02	75731986	A02_75731986_Sten	-	1	1	1	1	1	1	1	1	1	1	1	1	0	0	0	0	0	0	0	0	0	0	0	0	0	0	0	0	0	0	0	0	0	0	0	0	0	0	0	0	0
180	AX-147213651	Sten	A02	246.21	Aradu.A02	30987480	A02_30987480_Sten	-	1	1	1	1	1	1	1	1	1	1	1	1	0	0	0	0	0	0	0	0	0	0	0	0	0	0	0	0	0	0	0	0	0	0	0	0	0	0	0	0	0
181	AX-147214462	Sten	A02	262.097	Aradu.A02	81019015	A02_81019015_Sten	-	1	1	1	1	1	1	1	1	1	1	1	1	0	0	0	0	0	0	0	0	0	0	0	0	0	0	0	0	0	0	0	0	0	0	0	0	0	0	0	0	0
182	AX-147214548	Sten	A02	274.856	Aradu.A02	81783405	A02_81783405_Sten	-	1	1	1	1	1	1	1	1	1	1	1	1	0	0	0	0	0	0	0	0	0	0	0	0	0	0	0	0	0	0	0	0	0	0	0	0	0	0	0	0	0
183	AX-147242084	Sten	A02	281.993	Aradu.A02	82726560	A02_82726560_Sten	-	1	1	1	1	1	1	1	1	1	1	1	1	0	0	0	0	0	0	0	0	0	0	0	0	0	0	0	0	0	0	0	0	0	0	0	0	0	0	0	0	0
184	AX-147214665	Sten	A02	283.626	Aradu.A02	83464195	A02_83464195_Sten	Designed, ordered & Used (TableS2)	1	1	1	1	1	1	1	1	1	1	1	1	0	0	0	0	0	0	0	0	0	0	0	0	0	0	0	0	0	0	0	0	0	0	0	0	0	0	0	0	0
185	AX-147242202	Sten	A02	296.489	Aradu.A02	84827045	A02_84827045_Sten	-	1	1	1	1	1	1	1	1	1	1	1	1	0	0	0	0	0	0	0	0	0	0	0	0	0	0	0	0	0	0	0	0	0	0	0	0	0	0	0	0	0
186	AX-147214809	Sten	A02	299.133	Aradu.A02	85315365	A02_85315365_Sten	-	1	1	1	1	1	1	1	1	1	1	1	1	0	0	0	0	0	0	0	0	0	0	0	0	0	0	0	0	0	0	0	0	0	0	0	0	0	0	0	0	0
187	AX-147214863	Sten	A02	308.833	Aradu.A02	86385009	A02_86385009_Sten	-	1	1	1	1	1	1	1	1	1	1	1	1	0	0	0	0	0	0	0	0	0	0	0	0	0	0	0	0	0	0	0	0	0	0	0	0	0	0	0	0	0
188	AX-147214925	Sten	A02	314.2	Aradu.A02	87417752	A02_87417752_Sten	-	1	1	1	1	1	1	1	1	1	1	1	1	0	0	0	0	0	0	0	0	0	0	0	0	0	0	0	0	0	0	0	0	0	0	0	0	0	0	0	0	0
189	AX-147215014	Sten	A02	320.655	Aradu.A02	89159922	A02_89159922_Sten	-	1	1	1	1	1	1	1	1	1	1	1	1	0	0	0	0	0	0	0	0	0	0	0	0	0	0	0	0	0	0	0	0	0	0	0	0	0	0	0	0	0
190	AX-147215181	Sten	A02	334.133	Aradu.A02	91638679	A02_91638679_Sten	-	1	1	1	1	1	1	1	1	1	1	1	1	0	0	0	0	0	0	0	0	0	0	0	0	0	0	0	0	0	0	0	0	0	0	0	0	0	0	0	0	0
191	AX-147242820	Sten	A02	344.976	Aradu.A02	92612299	A02_92612299_Sten	Close SNP to A02_92077207_Sten (For KASP) (TableS2)	1	1	1	1	1	1	1	1	1	1	1	1	0	0	0	0	0	0	0	0	0	0	0	0	0	0	0	0	0	0	0	0	0	0	0	0	0	0	0	0	0
192	AX-147215236	Sten	A02	348.054	Aradu.A02	93081600	A02_93081600_Sten	Close SNP to A02_92983792_Sten (For KASP) (TableS2)	1	1	1	1	1	1	1	1	1	1	1	1	0	0	0	0	0	0	0	0	0	0	0	0	0	0	0	0	0	0	0	0	0	0	0	0	0	0	0	0	0
193	AX-147215261	Sten	A02	354.887	Aradu.A02	93790795	A02_93790795_Sten	-	1	1	1	1	1	1	1	1	1	1	1	1	0	0	0	0	0	0	0	0	0	0	0	0	0	0	0	0	0	0	0	0	0	0	0	0	0	0	0	0	0
194	AX-147215455	Sten	A03	35.44	Aradu.A03	2327702	A03_2327702_Sten	-	1	1	1	1	1	1	1	1	1	1	1	1	0	0	0	0	0	0	0	0	0	0	0	0	0	0	0	0	0	0	0	0	0	0	0	0	0	0	0	0	0
195	AX-147215573	Sten	A03	51.02	Aradu.A03	3808006	A03_3808006_Sten	-	1	1	1	1	1	1	1	1	1	1	1	1	0	0	0	0	0	0	0	0	0	0	0	0	0	0	0	0	0	0	0	0	0	0	0	0	0	0	0	0	0
196	AX-147215631	Sten	A03	55.602	Aradu.A03	4763112	A03_4763112_Sten	-	1	1	1	1	1	1	1	1	1	1	1	1	0	0	0	0	0	0	0	0	0	0	0	0	0	0	0	0	0	0	0	0	0	0	0	0	0	0	0	0	0
197	AX-147215659	Sten	A03	56.005	Aradu.A03	5242661	A03_5242661_Sten	-	1	1	1	1	1	1	1	1	1	1	1	1	0	0	0	0	0	0	0	0	0	0	0	0	0	0	0	0	0	0	0	0	0	0	0	0	0	0	0	0	0
198	AX-147215688	Sten	A03	58.492	Aradu.A03	6058658	A03_6058658_Sten	-	1	1	1	1	1	1	1	1	1	1	1	1	0	0	0	0	0	0	0	0	0	0	0	0	0	0	0	0	0	0	0	0	0	0	0	0	0	0	0	0	0
199	AX-147243932	Sten	A03	65.872	Aradu.A03	13770511	A03_13770511_Sten	-	1	1	1	1	1	1	1	1	1	1	1	1	0	0	0	0	0	0	0	0	0	0	0	0	0	0	0	0	0	0	0	0	0	0	0	0	0	0	0	0	0
200	AX-147216035	Sten	A03	73.175	Aradu.A03	12860261	A03_12860261_Sten	-	1	1	1	1	1	1	1	1	1	1	1	1	0	0	0	0	0	0	0	0	0	0	0	0	0	0	0	0	0	0	0	0	0	0	0	0	0	0	0	0	0
201	AX-147215901	Sten	A03	74.447	Aradu.A03	9964591	A03_9964591_Sten	-	1	1	1	1	1	1	1	1	1	1	1	1	0	0	0	0	0	0	0	0	0	0	0	0	0	0	0	0	0	0	0	0	0	0	0	0	0	0	0	0	0
202	AX-147216011	Sten	A03	78.168	Aradu.A03	12163967	A03_12163967_Sten	-	1	1	1	1	1	1	1	1	1	1	1	1	0	0	0	0	0	0	0	0	0	0	0	0	0	0	0	0	0	0	0	0	0	0	0	0	0	0	0	0	0
203	AX-147244080	Sten	A03	90.28	Aradu.A03	19856859	A03_19856859_Sten	-	1	1	1	1	1	1	1	1	1	1	1	1	1	1	1	1	1	1	1	1	1	1	1	1	1	1	1	1	1	1	1	1	1	1	1	1	1	1	1	1	1
204	AX-147216264	Sten	A03	95.505	Aradu.A03	20260008	A03_20260008_Sten	-	1	1	1	1	1	1	1	1	1	1	1	1	0	0	0	0	0	0	0	0	0	0	0	0	0	0	0	0	0	0	0	0	0	0	0	0	0	0	0	0	0
205	AX-147216380	Sten	A03	98.277	Aradu.A03	24640457	A03_24640457_Sten	-	1	1	1	1	1	1	1	1	1	1	1	1	0	0	0	0	0	0	0	0	0	0	0	0	0	0	0	0	0	0	0	0	0	0	0	0	0	0	0	0	0
206	AX-147216485	Sten	A03	99.879	Aradu.A03	26994891	A03_26994891_Sten	-	1	1	1	1	1	1	1	1	1	1	1	1	0	0	0	0	0	0	0	0	0	0	0	0	0	0	0	0	0	0	0	0	0	0	0	0	0	0	0	0	0
207	AX-147216517	Sten	A03	101.783	Aradu.A03	28031240	A03_28031240_Sten	-	1	1	1	1	1	1	1	1	1	1	1	1	0	0	0	0	0	0	0	0	0	0	0	0	0	0	0	0	0	0	0	0	0	0	0	0	0	0	0	0	0
208	AX-147216512	Sten	A03	102.956	Aradu.A03	27813965	A03_27813965_Sten	-	1	1	1	1	1	1	1	1	1	1	1	1	0	0	0	0	0	0	0	0	0	0	0	0	0	0	0	0	0	0	0	0	0	0	0	0	0	0	0	0	0
209	AX-147216537	Sten	A03	104.285	Aradu.A03	28985376	A03_28985376_Sten	-	1	1	1	1	1	1	1	1	1	1	1	1	0	0	0	0	0	0	0	0	0	0	0	0	0	0	0	0	0	0	0	0	0	0	0	0	0	0	0	0	0
210	AX-147216272	Sten	A03	106.661	Aradu.A03	20811542	A03_20811542_Sten	-	1	1	1	1	1	1	1	1	1	1	1	1	0	0	0	0	0	0	0	0	0	0	0	0	0	0	0	0	0	0	0	0	0	0	0	0	0	0	0	0	0
211	AX-147216663	Sten	A03	109.369	Aradu.A03	33077138	A03_33077138_Sten	-	1	1	1	1	1	1	1	1	1	1	1	1	0	0	0	0	0	0	0	0	0	0	0	0	0	0	0	0	0	0	0	0	0	0	0	0	0	0	0	0	0
212	AX-147217131	Sten	A03	130.274	Aradu.A03	91149853	A03_91149853_Sten	-	1	1	1	1	1	1	1	1	1	1	1	1	0	0	0	0	0	0	0	0	0	0	0	0	0	0	0	0	0	0	0	0	0	0	0	0	0	0	0	0	0
213	AX-147217043	Sten	A03	132.567	Aradu.A03	71754595	A03_71754595_Sten	-	1	1	1	1	1	1	1	1	1	1	1	1	0	0	0	0	0	0	0	0	0	0	0	0	0	0	0	0	0	0	0	0	0	0	0	0	0	0	0	0	0
214	AX-147217108	Sten	A03	133.845	Aradu.A03	85255264	A03_85255264_Sten	-	1	1	1	1	1	1	1	1	1	1	1	1	0	0	0	0	0	0	0	0	0	0	0	0	0	0	0	0	0	0	0	0	0	0	0	0	0	0	0	0	0
215	AX-147217102	Sten	A03	134.156	Aradu.A03	85054303	A03_85054303_Sten	-	1	1	1	1	1	1	1	1	1	1	1	1	0	0	0	0	0	0	0	0	0	0	0	0	0	0	0	0	0	0	0	0	0	0	0	0	0	0	0	0	0
216	AX-147217191	Sten	A03	135.453	Aradu.A03	100932532	A03_100932532_Sten	-	1	1	1	1	1	1	1	1	1	1	1	1	0	0	0	0	0	0	0	0	0	0	0	0	0	0	0	0	0	0	0	0	0	0	0	0	0	0	0	0	0
217	AX-147217180	Sten	A03	136.032	Aradu.A03	100096163	A03_100096163_Sten	-	1	1	1	1	1	1	1	1	1	1	1	1	0	0	0	0	0	0	0	0	0	0	0	0	0	0	0	0	0	0	0	0	0	0	0	0	0	0	0	0	0
218	AX-147217299	Sten	A03	137.809	Aradu.A03	108830624	A03_108830624_Sten	-	1	1	1	1	1	1	1	1	1	1	1	1	0	0	0	0	0	0	0	0	0	0	0	0	0	0	0	0	0	0	0	0	0	0	0	0	0	0	0	0	0
219	AX-147217342	Sten	A03	139.696	Aradu.A03	110293559	A03_110293559_Sten	-	1	1	1	1	1	1	1	1	1	1	1	1	0	0	0	0	0	0	0	0	0	0	0	0	0	0	0	0	0	0	0	0	0	0	0	0	0	0	0	0	0
220	AX-147245139	Sten	A03	142.524	Aradu.A03	114594574	A03_114594574_Sten	-	1	1	1	1	1	1	1	1	1	1	1	1	0	0	0	0	0	0	0	0	0	0	0	0	0	0	0	0	0	0	0	0	0	0	0	0	0	0	0	0	0
221	AX-147217486	Sten	A03	144.081	Aradu.A03	115670557	A03_115670557_Sten	-	1	1	1	1	1	1	1	1	1	1	1	1	0	0	0	0	0	0	0	0	0	0	0	0	0	0	0	0	0	0	0	0	0	0	0	0	0	0	0	0	0
222	AX-147217578	Sten	A03	150.291	Aradu.A03	117747708	A03_117747708_Sten	-	1	1	1	1	1	1	1	1	1	1	1	1	0	0	0	0	0	0	0	0	0	0	0	0	0	0	0	0	0	0	0	0	0	0	0	0	0	0	0	0	0
223	AX-147217602	Sten	A03	152.313	Aradu.A03	118027452	A03_118027452_Sten	-	1	1	1	1	1	1	1	1	1	1	1	1	0	0	0	0	0	0	0	0	0	0	0	0	0	0	0	0	0	0	0	0	0	0	0	0	0	0	0	0	0
224	AX-147217621	Sten	A03	154.668	Aradu.A03	118410190	A03_118410190_Sten	-	1	1	1	1	1	1	1	1	1	1	1	1	0	0	0	0	0	0	0	0	0	0	0	0	0	0	0	0	0	0	0	0	0	0	0	0	0	0	0	0	0
225	AX-147217767	Sten	A03	161.555	Aradu.A03	121697210	A03_121697210_Sten	-	1	1	1	1	1	1	1	1	1	1	1	1	0	0	0	0	0	0	0	0	0	0	0	0	0	0	0	0	0	0	0	0	0	0	0	0	0	0	0	0	0
226	AX-147217690	Sten	A03	163.892	Aradu.A03	119760138	A03_119760138_Sten	-	1	1	1	1	1	1	1	1	1	1	1	1	0	0	0	0	0	0	0	0	0	0	0	0	0	0	0	0	0	0	0	0	0	0	0	0	0	0	0	0	0
227	AX-147218000	Sten	A03	181.355	Aradu.A03	125668369	A03_125668369_Sten	-	1	1	1	1	1	1	1	1	1	1	1	1	0	0	0	0	0	0	0	0	0	0	0	0	0	0	0	0	0	0	0	0	0	0	0	0	0	0	0	0	0
228	AX-147218118	Sten	A03	185.466	Aradu.A03	127612693	A03_127612693_Sten	-	1	1	1	1	1	1	1	1	1	1	1	1	0	0	0	0	0	0	0	0	0	0	0	0	0	0	0	0	0	0	0	0	0	0	0	0	0	0	0	0	0
229	AX-147218132	Sten	A03	187.299	Aradu.A03	127785012	A03_127785012_Sten	-	1	1	1	1	1	1	1	1	1	1	1	1	0	0	0	0	0	0	0	0	0	0	0	0	0	0	0	0	0	0	0	0	0	0	0	0	0	0	0	0	0
230	AX-147218152	Sten	A03	188.867	Aradu.A03	128169984	A03_128169984_Sten	-	1	1	1	1	1	1	1	1	1	1	1	1	0	0	0	0	0	0	0	0	0	0	0	0	0	0	0	0	0	0	0	0	0	0	0	0	0	0	0	0	0
231	AX-147218253	Sten	A03	192.69	Aradu.A03	129126195	A03_129126195_Sten	-	1	1	1	1	1	1	1	1	1	1	1	1	0	0	0	0	0	0	0	0	0	0	0	0	0	0	0	0	0	0	0	0	0	0	0	0	0	0	0	0	0
232	AX-147218304	Sten	A03	197.928	Aradu.A03	129649608	A03_129649608_Sten	-	1	1	1	1	1	1	1	1	1	1	1	1	0	0	0	0	0	0	0	0	0	0	0	0	0	0	0	0	0	0	0	0	0	0	0	0	0	0	0	0	0
233	AX-147218365	Sten	A03	201.756	Aradu.A03	130403989	A03_130403989_Sten	-	1	1	1	1	1	1	1	1	1	1	1	1	0	0	0	0	0	0	0	0	0	0	0	0	0	0	0	0	0	0	0	0	0	0	0	0	0	0	0	0	0
234	AX-147218409	Sten	A03	205.463	Aradu.A03	130991357	A03_130991357_Sten	-	1	1	1	1	1	1	1	1	1	1	1	1	0	0	0	0	0	0	0	0	0	0	0	0	0	0	0	0	0	0	0	0	0	0	0	0	0	0	0	0	0
235	AX-147218424	Sten	A03	206.978	Aradu.A03	131184312	A03_131184312_Sten	-	1	1	1	1	1	1	1	1	1	1	1	1	0	0	0	0	0	0	0	0	0	0	0	0	0	0	0	0	0	0	0	0	0	0	0	0	0	0	0	0	0
236	AX-147218446	Sten	A03	208.973	Aradu.A03	131522694	A03_131522694_Sten	-	1	1	1	1	1	1	1	1	1	1	1	1	0	0	0	0	0	0	0	0	0	0	0	0	0	0	0	0	0	0	0	0	0	0	0	0	0	0	0	0	0
237	AX-147218442	Sten	A03	210.576	Aradu.A03	131479751	A03_131479751_Sten	-	1	1	1	1	1	1	1	1	1	1	1	1	0	0	0	0	0	0	0	0	0	0	0	0	0	0	0	0	0	0	0	0	0	0	0	0	0	0	0	0	0
238	AX-147218439	Sten	A03	212.813	Aradu.A03	131460394	A03_131460394_Sten	-	1	1	1	1	1	1	1	1	1	1	1	1	0	0	0	0	0	0	0	0	0	0	0	0	0	0	0	0	0	0	0	0	0	0	0	0	0	0	0	0	0
239	AX-147218483	Sten	A03	216.9	Aradu.A03	131858812	A03_131858812_Sten	-	1	1	1	1	1	1	1	1	1	1	1	1	0	0	0	0	0	0	0	0	0	0	0	0	0	0	0	0	0	0	0	0	0	0	0	0	0	0	0	0	0
240	AX-147218486	Sten	A03	219.772	Aradu.A03	131938753	A03_131938753_Sten	-	1	1	1	1	1	1	1	1	1	1	1	1	0	0	0	0	0	0	0	0	0	0	0	0	0	0	0	0	0	0	0	0	0	0	0	0	0	0	0	0	0
241	AX-147218506	Sten	A03	221.046	Aradu.A03	132428208	A03_132428208_Sten	-	1	1	1	1	1	1	1	1	1	1	1	1	0	0	0	0	0	0	0	0	0	0	0	0	0	0	0	0	0	0	0	0	0	0	0	0	0	0	0	0	0
242	AX-147218617	Sten	A03	230.471	Aradu.A03	133464199	A03_133464199_Sten	-	1	1	1	1	1	1	1	1	1	1	1	1	0	0	0	0	0	0	0	0	0	0	0	0	0	0	0	0	0	0	0	0	0	0	0	0	0	0	0	0	0
243	AX-147218705	Sten	A03	240.615	Aradu.A03	134335833	A03_134335833_Sten	-	1	1	1	1	1	1	1	1	1	1	1	1	0	0	0	0	0	0	0	0	0	0	0	0	0	0	0	0	0	0	0	0	0	0	0	0	0	0	0	0	0
244	AX-147218741	Sten	A03	242.262	Aradu.A03	134818517	A03_134818517_Sten	-	1	1	1	1	1	1	1	1	1	1	1	1	0	0	0	0	0	0	0	0	0	0	0	0	0	0	0	0	0	0	0	0	0	0	0	0	0	0	0	0	0
245	AX-147218758	Sten	A04	8.85	Aradu.A04	186370	A04_186370_Sten	-	1	1	1	1	1	1	1	1	1	1	1	1	0	0	0	0	0	0	0	0	0	0	0	0	0	0	0	0	0	0	0	0	0	0	0	0	0	0	0	0	0
246	AX-147218913	Sten	A04	18.464	Aradu.A04	1362368	A04_1362368_Sten	-	1	1	1	1	1	1	1	1	1	1	1	1	0	0	0	0	0	0	0	0	0	0	0	0	0	0	0	0	0	0	0	0	0	0	0	0	0	0	0	0	0
247	AX-147218852	Sten	A04	23.199	Aradu.A04	841579	A04_841579_Sten	-	1	1	1	1	1	1	1	1	1	1	1	1	0	0	0	0	0	0	0	0	0	0	0	0	0	0	0	0	0	0	0	0	0	0	0	0	0	0	0	0	0
248	AX-147218960	Sten	A04	30.16	Aradu.A04	1903375	A04_1903375_Sten	-	1	1	1	1	1	1	1	1	1	1	1	1	0	0	0	0	0	0	0	0	0	0	0	0	0	0	0	0	0	0	0	0	0	0	0	0	0	0	0	0	0
249	AX-147218990	Sten	A04	32.802	Aradu.A04	2341583	A04_2341583_Sten	-	1	1	1	1	1	1	1	1	1	1	1	1	0	0	0	0	0	0	0	0	0	0	0	0	0	0	0	0	0	0	0	0	0	0	0	0	0	0	0	0	0
250	AX-147219034	Sten	A04	35.419	Aradu.A04	2736798	A04_2736798_Sten	-	1	1	1	1	1	1	1	1	1	1	1	1	0	0	0	0	0	0	0	0	0	0	0	0	0	0	0	0	0	0	0	0	0	0	0	0	0	0	0	0	0
251	AX-147219040	Sten	A04	36.912	Aradu.A04	2755924	A04_2755924_Sten	-	1	1	1	1	1	1	1	1	1	1	1	1	0	0	0	0	0	0	0	0	0	0	0	0	0	0	0	0	0	0	0	0	0	0	0	0	0	0	0	0	0
252	AX-147219035	Sten	A04	37.295	Aradu.A04	2737129	A04_2737129_Sten	-	1	1	1	1	1	1	1	1	1	1	1	1	0	0	0	0	0	0	0	0	0	0	0	0	0	0	0	0	0	0	0	0	0	0	0	0	0	0	0	0	0
253	AX-147219075	Sten	A04	41.105	Aradu.A04	3019208	A04_3019208_Sten	-	1	1	1	1	1	1	1	1	1	1	1	1	0	0	0	0	0	0	0	0	0	0	0	0	0	0	0	0	0	0	0	0	0	0	0	0	0	0	0	0	0
254	AX-147219071	Sten	A04	43.122	Aradu.A04	2986913	A04_2986913_Sten	-	1	1	1	1	1	1	1	1	1	1	1	1	0	0	0	0	0	0	0	0	0	0	0	0	0	0	0	0	0	0	0	0	0	0	0	0	0	0	0	0	0
255	AX-147219138	Sten	A04	48	Aradu.A04	3712941	A04_3712941_Sten	-	1	1	1	1	1	1	1	1	1	1	1	1	0	0	0	0	0	0	0	0	0	0	0	0	0	0	0	0	0	0	0	0	0	0	0	0	0	0	0	0	0
256	AX-147219127	Sten	A04	48.57	Aradu.A04	3517899	A04_3517899_Sten	-	1	1	1	1	1	1	1	1	1	1	1	1	0	0	0	0	0	0	0	0	0	0	0	0	0	0	0	0	0	0	0	0	0	0	0	0	0	0	0	0	0
257	AX-147219161	Sten	A04	52.52	Aradu.A04	4216107	A04_4216107_Sten	-	1	1	1	1	1	1	1	1	1	1	1	1	0	0	0	0	0	0	0	0	0	0	0	0	0	0	0	0	0	0	0	0	0	0	0	0	0	0	0	0	0
258	AX-147219235	Sten	A04	58.836	Aradu.A04	5659551	A04_5659551_Sten	-	1	1	1	1	1	1	1	1	1	1	1	1	0	0	0	0	0	0	0	0	0	0	0	0	0	0	0	0	0	0	0	0	0	0	0	0	0	0	0	0	0
259	AX-147219256	Sten	A04	63.466	Aradu.A04	6528613	A04_6528613_Sten	-	1	1	1	1	1	1	1	1	1	1	1	1	0	0	0	0	0	0	0	0	0	0	0	0	0	0	0	0	0	0	0	0	0	0	0	0	0	0	0	0	0
260	AX-147219321	Sten	A04	67.275	Aradu.A04	7370876	A04_7370876_Sten	-	1	1	1	1	1	1	1	1	1	1	1	1	0	0	0	0	0	0	0	0	0	0	0	0	0	0	0	0	0	0	0	0	0	0	0	0	0	0	0	0	0
261	AX-147219466	Sten	A04	76.251	Aradu.A04	10403187	A04_10403187_Sten	-	1	1	1	1	1	1	1	1	1	1	1	1	0	0	0	0	0	0	0	0	0	0	0	0	0	0	0	0	0	0	0	0	0	0	0	0	0	0	0	0	0
262	AX-147219517	Sten	A04	79.89	Aradu.A04	12779729	A04_12779729_Sten	-	1	1	1	1	1	1	1	1	1	1	1	1	0	0	0	0	0	0	0	0	0	0	0	0	0	0	0	0	0	0	0	0	0	0	0	0	0	0	0	0	0
263	AX-147219503	Sten	A04	80.901	Aradu.A04	12230276	A04_12230276_Sten	-	1	1	1	1	1	1	1	1	1	1	1	1	0	0	0	0	0	0	0	0	0	0	0	0	0	0	0	0	0	0	0	0	0	0	0	0	0	0	0	0	0
264	AX-147219646	Sten	A04	83.98	Aradu.A04	18406467	A04_18406467_Sten	-	1	1	1	1	1	1	1	1	1	1	1	1	0	0	0	0	0	0	0	0	0	0	0	0	0	0	0	0	0	0	0	0	0	0	0	0	0	0	0	0	0
265	AX-147219658	Sten	A04	83.982	Aradu.A04	19952930	A04_19952930_Sten	-	1	1	1	1	1	1	1	1	1	1	1	1	0	0	0	0	0	0	0	0	0	0	0	0	0	0	0	0	0	0	0	0	0	0	0	0	0	0	0	0	0
266	AX-147219833	Sten	A04	88.319	Aradu.A04	31201580	A04_31201580_Sten	-	1	1	1	1	1	1	1	1	1	1	1	1	0	0	0	0	0	0	0	0	0	0	0	0	0	0	0	0	0	0	0	0	0	0	0	0	0	0	0	0	0
267	AX-147219761	Sten	A04	90.557	Aradu.A04	26018057	A04_26018057_Sten	-	1	1	1	1	1	1	1	1	1	1	1	1	0	0	0	0	0	0	0	0	0	0	0	0	0	0	0	0	0	0	0	0	0	0	0	0	0	0	0	0	0
268	AX-147219969	Sten	A04	96.275	Aradu.A04	43910476	A04_43910476_Sten	-	1	1	1	1	1	1	1	1	1	1	1	1	0	0	0	0	0	0	0	0	0	0	0	0	0	0	0	0	0	0	0	0	0	0	0	0	0	0	0	0	0
269	AX-147220250	Sten	A04	104.567	Aradu.A04	85249177	A04_85249177_Sten	-	1	1	1	1	1	1	1	1	1	1	1	1	0	0	0	0	0	0	0	0	0	0	0	0	0	0	0	0	0	0	0	0	0	0	0	0	0	0	0	0	0
270	AX-147220074	Sten	A04	107.036	Aradu.A04	62753825	A04_62753825_Sten	-	1	1	1	1	1	1	1	1	1	1	1	1	0	0	0	0	0	0	0	0	0	0	0	0	0	0	0	0	0	0	0	0	0	0	0	0	0	0	0	0	0
271	AX-147220067	Sten	A04	108.67	Aradu.A04	61632456	A04_61632456_Sten	-	1	1	1	1	1	1	1	1	1	1	1	1	0	0	0	0	0	0	0	0	0	0	0	0	0	0	0	0	0	0	0	0	0	0	0	0	0	0	0	0	0
272	AX-147220154	Sten	A04	109.698	Aradu.A04	76565873	A04_76565873_Sten	-	1	1	1	1	1	1	1	1	1	1	1	1	0	0	0	0	0	0	0	0	0	0	0	0	0	0	0	0	0	0	0	0	0	0	0	0	0	0	0	0	0
273	AX-147220290	Sten	A04	113.168	Aradu.A04	89924581	A04_89924581_Sten	-	1	1	1	1	1	1	1	1	1	1	1	1	0	0	0	0	0	0	0	0	0	0	0	0	0	0	0	0	0	0	0	0	0	0	0	0	0	0	0	0	0
274	AX-147220040	Sten	A04	114.891	Aradu.A04	53185121	A04_53185121_Sten	-	1	1	1	1	1	1	1	1	1	1	1	1	0	0	0	0	0	0	0	0	0	0	0	0	0	0	0	0	0	0	0	0	0	0	0	0	0	0	0	0	0
275	AX-147220329	Sten	A04	117.962	Aradu.A04	92696031	A04_92696031_Sten	-	1	1	1	1	1	1	1	1	1	1	1	1	0	0	0	0	0	0	0	0	0	0	0	0	0	0	0	0	0	0	0	0	0	0	0	0	0	0	0	0	0
276	AX-147220404	Sten	A04	122.299	Aradu.A04	98758169	A04_98758169_Sten	-	1	1	1	1	1	1	1	1	1	1	1	1	0	0	0	0	0	0	0	0	0	0	0	0	0	0	0	0	0	0	0	0	0	0	0	0	0	0	0	0	0
277	AX-147220481	Sten	A04	124.854	Aradu.A04	103964432	A04_103964432_Sten	-	1	1	1	1	1	1	1	1	1	1	1	1	0	0	0	0	0	0	0	0	0	0	0	0	0	0	0	0	0	0	0	0	0	0	0	0	0	0	0	0	0
278	AX-147220500	Sten	A04	125.974	Aradu.A04	104172441	A04_104172441_Sten	-	1	1	1	1	1	1	1	1	1	1	1	1	0	0	0	0	0	0	0	0	0	0	0	0	0	0	0	0	0	0	0	0	0	0	0	0	0	0	0	0	0
279	AX-147220633	Sten	A04	137.218	Aradu.A04	108230713	A04_108230713_Sten	-	1	1	1	1	1	1	1	1	1	1	1	1	0	0	0	0	0	0	0	0	0	0	0	0	0	0	0	0	0	0	0	0	0	0	0	0	0	0	0	0	0
280	AX-147220708	Sten	A04	139.595	Aradu.A04	110684871	A04_110684871_Sten	-	1	1	1	1	1	1	1	1	1	1	1	1	0	0	0	0	0	0	0	0	0	0	0	0	0	0	0	0	0	0	0	0	0	0	0	0	0	0	0	0	0
281	AX-147220775	Sten	A04	142.529	Aradu.A04	112403290	A04_112403290_Sten	-	1	1	1	1	1	1	1	1	1	1	1	1	0	0	0	0	0	0	0	0	0	0	0	0	0	0	0	0	0	0	0	0	0	0	0	0	0	0	0	0	0
282	AX-147220802	Sten	A04	144.364	Aradu.A04	112877017	A04_112877017_Sten	-	1	1	1	1	1	1	1	1	1	1	1	1	0	0	0	0	0	0	0	0	0	0	0	0	0	0	0	0	0	0	0	0	0	0	0	0	0	0	0	0	0
283	AX-147220842	Sten	A04	146.632	Aradu.A04	113654774	A04_113654774_Sten	-	1	1	1	1	1	1	1	1	1	1	1	1	0	0	0	0	0	0	0	0	0	0	0	0	0	0	0	0	0	0	0	0	0	0	0	0	0	0	0	0	0
284	AX-147220883	Sten	A04	148.339	Aradu.A04	114359220	A04_114359220_Sten	-	1	1	1	1	1	1	1	1	1	1	1	1	0	0	0	0	0	0	0	0	0	0	0	0	0	0	0	0	0	0	0	0	0	0	0	0	0	0	0	0	0
285	AX-147220911	Sten	A04	180.675	Aradu.A04	115264231	A04_115264231_Sten	-	1	1	1	1	1	1	1	1	1	1	1	1	0	0	0	0	0	0	0	0	0	0	0	0	0	0	0	0	0	0	0	0	0	0	0	0	0	0	0	0	0
286	AX-147221103	Sten	A04	200.144	Aradu.A04	118778510	A04_118778510_Sten	-	1	1	1	1	1	1	1	1	1	1	1	1	0	0	0	0	0	0	0	0	0	0	0	0	0	0	0	0	0	0	0	0	0	0	0	0	0	0	0	0	0
287	AX-147221095	Sten	A04	203.145	Aradu.A04	118561572	A04_118561572_Sten	-	1	1	1	1	1	1	1	1	1	1	1	1	0	0	0	0	0	0	0	0	0	0	0	0	0	0	0	0	0	0	0	0	0	0	0	0	0	0	0	0	0
288	AX-147221220	Sten	A04	211.871	Aradu.A04	119895249	A04_119895249_Sten	-	1	1	1	1	1	1	1	1	1	1	1	1	0	0	0	0	0	0	0	0	0	0	0	0	0	0	0	0	0	0	0	0	0	0	0	0	0	0	0	0	0
289	AX-147221314	Sten	A04	219.327	Aradu.A04	120929244	A04_120929244_Sten	-	1	1	1	1	1	1	1	1	1	1	1	1	0	0	0	0	0	0	0	0	0	0	0	0	0	0	0	0	0	0	0	0	0	0	0	0	0	0	0	0	0
290	AX-147248820	Sten	A04	225.213	Aradu.A04	120938084	A04_120938084_Sten	-	1	1	1	1	1	1	1	1	1	1	1	1	0	0	0	0	0	0	0	0	0	0	0	0	0	0	0	0	0	0	0	0	0	0	0	0	0	0	0	0	0
291	AX-147248848	Sten	A04	231.802	Aradu.A04	121169134	A04_121169134_Sten	-	1	1	1	1	1	1	1	1	1	1	1	1	0	0	0	0	0	0	0	0	0	0	0	0	0	0	0	0	0	0	0	0	0	0	0	0	0	0	0	0	0
292	AX-147221372	Sten	A04	232.849	Aradu.A04	121229546	A04_121229546_Sten	-	1	1	1	1	1	1	1	1	1	1	1	1	0	0	0	0	0	0	0	0	0	0	0	0	0	0	0	0	0	0	0	0	0	0	0	0	0	0	0	0	0
293	AX-147221431	Sten	A04	245.498	Aradu.A04	123417094	A04_123417094_Sten	-	1	1	1	1	1	1	1	1	1	1	1	1	0	0	0	0	0	0	0	0	0	0	0	0	0	0	0	0	0	0	0	0	0	0	0	0	0	0	0	0	0
294	AX-147249566	Sten	A05	0	Aradu.A05	20650154	A05_20650154_Sten	-	1	1	1	1	1	1	1	1	1	1	1	1	1	1	1	1	1	1	1	1	1	1	1	1	1	1	1	1	1	1	1	1	1	1	1	1	0	0	0	0	0
295	AX-147221919	Sten	A05	12.503	Aradu.A05	14263497	A05_14263497_Sten	-	1	1	1	1	1	1	1	1	1	1	1	1	0	0	0	0	0	0	0	0	0	0	0	0	0	0	0	0	0	0	0	0	0	0	0	0	0	0	0	0	0
296	AX-147221702	Sten	A05	23.494	Aradu.A05	8422937	A05_8422937_Sten	-	1	1	1	1	1	1	1	1	1	1	1	1	0	0	0	0	0	0	0	0	0	0	0	0	0	0	0	0	0	0	0	0	0	0	0	0	0	0	0	0	0
297	AX-147221713	Sten	A05	25.917	Aradu.A05	8621849	A05_8621849_Sten	-	1	1	1	1	1	1	1	1	1	1	1	1	0	0	0	0	0	0	0	0	0	0	0	0	0	0	0	0	0	0	0	0	0	0	0	0	0	0	0	0	0
298	AX-147221691	Sten	A05	27.276	Aradu.A05	8040921	A05_8040921_Sten	-	1	1	1	1	1	1	1	1	1	1	1	1	0	0	0	0	0	0	0	0	0	0	0	0	0	0	0	0	0	0	0	0	0	0	0	0	0	0	0	0	0
299	AX-147221684	Sten	A05	28.571	Aradu.A05	7919003	A05_7919003_Sten	-	1	1	1	1	1	1	1	1	1	1	1	1	0	0	0	0	0	0	0	0	0	0	0	0	0	0	0	0	0	0	0	0	0	0	0	0	0	0	0	0	0
300	AX-147221688	Sten	A05	29.347	Aradu.A05	7958564	A05_7958564_Sten	-	1	1	1	1	1	1	1	1	1	1	1	1	0	0	0	0	0	0	0	0	0	0	0	0	0	0	0	0	0	0	0	0	0	0	0	0	0	0	0	0	0
301	AX-147221776	Sten	A05	31.681	Aradu.A05	10183605	A05_10183605_Sten	-	1	1	1	1	1	1	1	1	1	1	1	1	0	0	0	0	0	0	0	0	0	0	0	0	0	0	0	0	0	0	0	0	0	0	0	0	0	0	0	0	0
302	AX-147221803	Sten	A05	32.452	Aradu.A05	10961901	A05_10961901_Sten	-	1	1	1	1	1	1	1	1	1	1	1	1	0	0	0	0	0	0	0	0	0	0	0	0	0	0	0	0	0	0	0	0	0	0	0	0	0	0	0	0	0
303	AX-147221836	Sten	A05	34.007	Aradu.A05	11851959	A05_11851959_Sten	-	1	1	1	1	1	1	1	1	1	1	1	1	0	0	0	0	0	0	0	0	0	0	0	0	0	0	0	0	0	0	0	0	0	0	0	0	0	0	0	0	0
304	AX-147221874	Sten	A05	35.562	Aradu.A05	13259270	A05_13259270_Sten	-	1	1	1	1	1	1	1	1	1	1	1	1	0	0	0	0	0	0	0	0	0	0	0	0	0	0	0	0	0	0	0	0	0	0	0	0	0	0	0	0	0
305	AX-147222142	Sten	A05	40.551	Aradu.A05	20099592	A05_20099592_Sten	-	1	1	1	1	1	1	1	1	1	1	1	1	0	0	0	0	0	0	0	0	0	0	0	0	0	0	0	0	0	0	0	0	0	0	0	0	0	0	0	0	0
306	AX-147222100	Sten	A05	40.836	Aradu.A05	18621181	A05_18621181_Sten	-	1	1	1	1	1	1	1	1	1	1	1	1	0	0	0	0	0	0	0	0	0	0	0	0	0	0	0	0	0	0	0	0	0	0	0	0	0	0	0	0	0
307	AX-147222046	Sten	A05	41.609	Aradu.A05	17231044	A05_17231044_Sten	-	1	1	1	1	1	1	1	1	1	1	1	1	0	0	0	0	0	0	0	0	0	0	0	0	0	0	0	0	0	0	0	0	0	0	0	0	0	0	0	0	0
308	AX-147222047	Sten	A05	42.381	Aradu.A05	17232224	A05_17232224_Sten	-	1	1	1	1	1	1	1	1	1	1	1	1	0	0	0	0	0	0	0	0	0	0	0	0	0	0	0	0	0	0	0	0	0	0	0	0	0	0	0	0	0
309	AX-147222497	Sten	A05	55.844	Aradu.A05	50577511	A05_50577511_Sten	-	1	1	1	1	1	1	1	1	1	1	1	1	0	0	0	0	0	0	0	0	0	0	0	0	0	0	0	0	0	0	0	0	0	0	0	0	0	0	0	0	0
310	AX-147222237	Sten	A05	56.446	Aradu.A05	23757186	A05_23757186_Sten	-	1	1	1	1	1	1	1	1	1	1	1	1	0	0	0	0	0	0	0	0	0	0	0	0	0	0	0	0	0	0	0	0	0	0	0	0	0	0	0	0	0
311	AX-147222358	Sten	A05	56.966	Aradu.A05	32342436	A05_32342436_Sten	-	1	1	1	1	1	1	1	1	1	1	1	1	0	0	0	0	0	0	0	0	0	0	0	0	0	0	0	0	0	0	0	0	0	0	0	0	0	0	0	0	0
312	AX-147222496	Sten	A05	58.647	Aradu.A05	50529881	A05_50529881_Sten	-	1	1	1	1	1	1	1	1	1	1	1	1	0	0	0	0	0	0	0	0	0	0	0	0	0	0	0	0	0	0	0	0	0	0	0	0	0	0	0	0	0
313	AX-147222936	Sten	A05	65.928	Aradu.A05	86654618	A05_86654618_Sten	-	1	1	1	1	1	1	1	1	1	1	1	1	0	0	0	0	0	0	0	0	0	0	0	0	0	0	0	0	0	0	0	0	0	0	0	0	0	0	0	0	0
314	AX-147222944	Sten	A05	66.184	Aradu.A05	86735502	A05_86735502_Sten	-	1	1	1	1	1	1	1	1	1	1	1	1	0	0	0	0	0	0	0	0	0	0	0	0	0	0	0	0	0	0	0	0	0	0	0	0	0	0	0	0	0
315	AX-147223052	Sten	A05	67.733	Aradu.A05	88665268	A05_88665268_Sten	-	1	1	1	1	1	1	1	1	1	1	1	1	0	0	0	0	0	0	0	0	0	0	0	0	0	0	0	0	0	0	0	0	0	0	0	0	0	0	0	0	0
316	AX-147223345	Sten	A05	70.863	Aradu.A05	95829469	A05_95829469_Sten	-	1	1	1	1	1	1	1	1	1	1	1	1	0	0	0	0	0	0	0	0	0	0	0	0	0	0	0	0	0	0	0	0	0	0	0	0	0	0	0	0	0
317	AX-147223371	Sten	A05	72.256	Aradu.A05	96432005	A05_96432005_Sten	-	1	1	1	1	1	1	1	1	1	1	1	1	0	0	0	0	0	0	0	0	0	0	0	0	0	0	0	0	0	0	0	0	0	0	0	0	0	0	0	0	0
318	AX-147250318	Sten	A05	87.904	Aradu.A05	100502781	A05_100502781_Sten	-	1	1	1	1	1	1	1	1	1	1	1	1	0	0	0	0	0	0	0	0	0	0	0	0	0	0	0	0	0	0	0	0	0	0	0	0	0	0	0	0	0
319	AX-147223510	Sten	A05	88.738	Aradu.A05	100520681	A05_100520681_Sten	-	1	1	1	1	1	1	1	1	1	1	1	1	0	0	0	0	0	0	0	0	0	0	0	0	0	0	0	0	0	0	0	0	0	0	0	0	0	0	0	0	0
320	AX-147223533	Sten	A05	91.066	Aradu.A05	101084410	A05_101084410_Sten	-	1	1	1	1	1	1	1	1	1	1	1	1	0	0	0	0	0	0	0	0	0	0	0	0	0	0	0	0	0	0	0	0	0	0	0	0	0	0	0	0	0
321	AX-147223696	Sten	A05	100.689	Aradu.A05	104206477	A05_104206477_Sten	-	1	1	1	1	1	1	1	1	1	1	1	1	0	0	0	0	0	0	0	0	0	0	0	0	0	0	0	0	0	0	0	0	0	0	0	0	0	0	0	0	0
322	AX-147224108	Sten	A06	0	Aradu.A06	517702	A06_517702_Sten	-	1	1	1	1	1	1	1	1	1	1	1	1	0	0	0	0	0	0	0	0	0	0	0	0	0	0	0	0	0	0	0	0	0	0	0	0	0	0	0	0	0
323	AX-147224165	Sten	A06	11.509	Aradu.A06	1222129	A06_1222129_Sten	-	1	1	1	1	1	1	1	1	1	1	1	1	0	0	0	0	0	0	0	0	0	0	0	0	0	0	0	0	0	0	0	0	0	0	0	0	0	0	0	0	0
324	AX-147224216	Sten	A06	20.114	Aradu.A06	1684615	A06_1684615_Sten	-	1	1	1	1	1	1	1	1	1	1	1	1	0	0	0	0	0	0	0	0	0	0	0	0	0	0	0	0	0	0	0	0	0	0	0	0	0	0	0	0	0
325	AX-147224248	Sten	A06	25.187	Aradu.A06	2371320	A06_2371320_Sten	-	1	1	1	1	1	1	1	1	1	1	1	1	0	0	0	0	0	0	0	0	0	0	0	0	0	0	0	0	0	0	0	0	0	0	0	0	0	0	0	0	0
326	AX-147224251	Sten	A06	26.579	Aradu.A06	2375139	A06_2375139_Sten	-	1	1	1	1	1	1	1	1	1	1	1	1	0	0	0	0	0	0	0	0	0	0	0	0	0	0	0	0	0	0	0	0	0	0	0	0	0	0	0	0	0
327	AX-147224280	Sten	A06	31.894	Aradu.A06	2863952	A06_2863952_Sten	-	1	1	1	1	1	1	1	1	1	1	1	1	0	0	0	0	0	0	0	0	0	0	0	0	0	0	0	0	0	0	0	0	0	0	0	0	0	0	0	0	0
328	AX-147224270	Sten	A06	34.776	Aradu.A06	2747003	A06_2747003_Sten	-	1	1	1	1	1	1	1	1	1	1	1	1	0	0	0	0	0	0	0	0	0	0	0	0	0	0	0	0	0	0	0	0	0	0	0	0	0	0	0	0	0
329	AX-147224316	Sten	A06	50.983	Aradu.A06	3474367	A06_3474367_Sten	-	1	1	1	1	1	1	1	1	1	1	1	1	0	0	0	0	0	0	0	0	0	0	0	0	0	0	0	0	0	0	0	0	0	0	0	0	0	0	0	0	0
330	AX-147224370	Sten	A06	55.631	Aradu.A06	4261015	A06_4261015_Sten	-	1	1	1	1	1	1	1	1	1	1	1	1	0	0	0	0	0	0	0	0	0	0	0	0	0	0	0	0	0	0	0	0	0	0	0	0	0	0	0	0	0
331	AX-147224372	Sten	A06	56.257	Aradu.A06	4280783	A06_4280783_Sten	-	1	1	1	1	1	1	1	1	1	1	1	1	0	0	0	0	0	0	0	0	0	0	0	0	0	0	0	0	0	0	0	0	0	0	0	0	0	0	0	0	0
332	AX-147252314	Sten	A06	57.188	Aradu.A06	4386492	A06_4386492_Sten	-	1	1	1	1	1	1	1	1	1	1	1	1	0	0	0	0	0	0	0	0	0	0	0	0	0	0	0	0	0	0	0	0	0	0	0	0	0	0	0	0	0
333	AX-147260196	Sten	A06	66.72	Aradu.A09	8267219	A09_8267219_Sten	-	1	1	1	1	1	1	1	1	1	1	1	1	0	0	0	0	0	0	0	0	0	0	0	0	0	0	0	0	0	0	0	0	0	0	0	0	0	0	0	0	0
334	AX-147224487	Sten	A06	76.765	Aradu.A06	5411401	A06_5411401_Sten	-	1	1	1	1	1	1	1	1	1	1	1	1	0	0	0	0	0	0	0	0	0	0	0	0	0	0	0	0	0	0	0	0	0	0	0	0	0	0	0	0	0
335	AX-147224485	Sten	A06	77.381	Aradu.A06	5405523	A06_5405523_Sten	-	1	1	1	1	1	1	1	1	1	1	1	1	0	0	0	0	0	0	0	0	0	0	0	0	0	0	0	0	0	0	0	0	0	0	0	0	0	0	0	0	0
336	AX-147224507	Sten	A06	80.827	Aradu.A06	5789236	A06_5789236_Sten	-	1	1	1	1	1	1	1	1	1	1	1	1	0	0	0	0	0	0	0	0	0	0	0	0	0	0	0	0	0	0	0	0	0	0	0	0	0	0	0	0	0
337	AX-147224569	Sten	A06	86.334	Aradu.A06	6596410	A06_6596410_Sten	-	1	1	1	1	1	1	1	1	1	1	1	1	0	0	0	0	0	0	0	0	0	0	0	0	0	0	0	0	0	0	0	0	0	0	0	0	0	0	0	0	0
338	AX-147224620	Sten	A06	89.66	Aradu.A06	7334057	A06_7334057_Sten	-	1	1	1	1	1	1	1	1	1	1	1	1	0	0	0	0	0	0	0	0	0	0	0	0	0	0	0	0	0	0	0	0	0	0	0	0	0	0	0	0	0
339	AX-147224636	Sten	A06	90.743	Aradu.A06	7672324	A06_7672324_Sten	-	1	1	1	1	1	1	1	1	1	1	1	1	0	0	0	0	0	0	0	0	0	0	0	0	0	0	0	0	0	0	0	0	0	0	0	0	0	0	0	0	0
340	AX-147224664	Sten	A06	92.32	Aradu.A06	8149649	A06_8149649_Sten	-	1	1	1	1	1	1	1	1	1	1	1	1	0	0	0	0	0	0	0	0	0	0	0	0	0	0	0	0	0	0	0	0	0	0	0	0	0	0	0	0	0
341	AX-147224808	Sten	A06	98.723	Aradu.A06	10688288	A06_10688288_Sten	-	1	1	1	1	1	1	1	1	1	1	1	1	0	0	0	0	0	0	0	0	0	0	0	0	0	0	0	0	0	0	0	0	0	0	0	0	0	0	0	0	0
342	AX-147224737	Sten	A06	108.044	Aradu.A06	9574526	A06_9574526_Sten	-	1	1	1	1	1	1	1	1	1	1	1	1	0	0	0	0	0	0	0	0	0	0	0	0	0	0	0	0	0	0	0	0	0	0	0	0	0	0	0	0	0
343	AX-147224945	Sten	A06	128.581	Aradu.A06	12964569	A06_12964569_Sten	-	1	1	1	1	1	1	1	1	1	1	1	1	0	0	0	0	0	0	0	0	0	0	0	0	0	0	0	0	0	0	0	0	0	0	0	0	0	0	0	0	0
344	AX-147225078	Sten	A06	134.13	Aradu.A06	15715130	A06_15715130_Sten	-	1	1	1	1	1	1	1	1	1	1	1	1	0	0	0	0	0	0	0	0	0	0	0	0	0	0	0	0	0	0	0	0	0	0	0	0	0	0	0	0	0
345	AX-147225104	Sten	A06	135.386	Aradu.A06	16428344	A06_16428344_Sten	-	1	1	1	1	1	1	1	1	1	1	1	1	0	0	0	0	0	0	0	0	0	0	0	0	0	0	0	0	0	0	0	0	0	0	0	0	0	0	0	0	0
346	AX-147225232	Sten	A06	138.786	Aradu.A06	20970182	A06_20970182_Sten	-	1	1	1	1	1	1	1	1	1	1	1	1	0	0	0	0	0	0	0	0	0	0	0	0	0	0	0	0	0	0	0	0	0	0	0	0	0	0	0	0	0
347	AX-147225443	Sten	A06	139.567	Aradu.A06	66423228	A06_66423228_Sten	-	1	1	1	1	1	1	1	1	1	1	1	1	0	0	0	0	0	0	0	0	0	0	0	0	0	0	0	0	0	0	0	0	0	0	0	0	0	0	0	0	0
348	AX-147225334	Sten	A06	139.671	Aradu.A06	34826404	A06_34826404_Sten	-	1	1	1	1	1	1	1	1	1	1	1	1	0	0	0	0	0	0	0	0	0	0	0	0	0	0	0	0	0	0	0	0	0	0	0	0	0	0	0	0	0
349	AX-147225325	Sten	A06	140.265	Aradu.A06	32572657	A06_32572657_Sten	-	1	1	1	1	1	1	1	1	1	1	1	1	0	0	0	0	0	0	0	0	0	0	0	0	0	0	0	0	0	0	0	0	0	0	0	0	0	0	0	0	0
350	AX-147225464	Sten	A06	148.83	Aradu.A06	69465627	A06_69465627_Sten	-	1	1	1	1	1	1	1	1	1	1	1	1	0	0	0	0	0	0	0	0	0	0	0	0	0	0	0	0	0	0	0	0	0	0	0	0	0	0	0	0	0
351	AX-147225594	Sten	A06	153.242	Aradu.A06	79851479	A06_79851479_Sten	-	1	1	1	1	1	1	1	1	1	1	1	1	0	0	0	0	0	0	0	0	0	0	0	0	0	0	0	0	0	0	0	0	0	0	0	0	0	0	0	0	0
352	AX-147225368	Sten	A06	158.013	Aradu.A06	52572560	A06_52572560_Sten	-	1	1	1	1	1	1	1	1	1	1	1	1	0	0	0	0	0	0	0	0	0	0	0	0	0	0	0	0	0	0	0	0	0	0	0	0	0	0	0	0	0
353	AX-147225651	Sten	A06	179.375	Aradu.A06	82779734	A06_82779734_Sten	-	1	1	1	1	1	1	1	1	1	1	1	1	0	0	0	0	0	0	0	0	0	0	0	0	0	0	0	0	0	0	0	0	0	0	0	0	0	0	0	0	0
354	AX-147225614	Sten	A06	179.695	Aradu.A06	80755197	A06_80755197_Sten	-	1	1	1	1	1	1	1	1	1	1	1	1	0	0	0	0	0	0	0	0	0	0	0	0	0	0	0	0	0	0	0	0	0	0	0	0	0	0	0	0	0
355	AX-147225650	Sten	A06	182.331	Aradu.A06	82779126	A06_82779126_Sten	-	1	1	1	1	1	1	1	1	1	1	1	1	0	0	0	0	0	0	0	0	0	0	0	0	0	0	0	0	0	0	0	0	0	0	0	0	0	0	0	0	0
356	AX-147225805	Sten	A06	185.815	Aradu.A06	91658393	A06_91658393_Sten	-	1	1	1	1	1	1	1	1	1	1	1	1	0	0	0	0	0	0	0	0	0	0	0	0	0	0	0	0	0	0	0	0	0	0	0	0	0	0	0	0	0
357	AX-147225934	Sten	A06	192.564	Aradu.A06	97902979	A06_97902979_Sten	-	1	1	1	1	1	1	1	1	1	1	1	1	0	0	0	0	0	0	0	0	0	0	0	0	0	0	0	0	0	0	0	0	0	0	0	0	0	0	0	0	0
358	AX-147226002	Sten	A06	195.696	Aradu.A06	99493705	A06_99493705_Sten	-	1	1	1	1	1	1	1	1	1	1	1	1	0	0	0	0	0	0	0	0	0	0	0	0	0	0	0	0	0	0	0	0	0	0	0	0	0	0	0	0	0
359	AX-147226037	Sten	A06	197.068	Aradu.A06	100317242	A06_100317242_Sten	-	1	1	1	1	1	1	1	1	1	1	1	1	0	0	0	0	0	0	0	0	0	0	0	0	0	0	0	0	0	0	0	0	0	0	0	0	0	0	0	0	0
360	AX-147225997	Sten	A06	204.344	Aradu.A06	99250062	A06_99250062_Sten	-	1	1	1	1	1	1	1	1	1	1	1	1	0	0	0	0	0	0	0	0	0	0	0	0	0	0	0	0	0	0	0	0	0	0	0	0	0	0	0	0	0
361	AX-147226076	Sten	A06	209.738	Aradu.A06	101146798	A06_101146798_Sten	-	1	1	1	1	1	1	1	1	1	1	1	1	0	0	0	0	0	0	0	0	0	0	0	0	0	0	0	0	0	0	0	0	0	0	0	0	0	0	0	0	0
362	AX-147226154	Sten	A06	214.176	Aradu.A06	102679941	A06_102679941_Sten	-	1	1	1	1	1	1	1	1	1	1	1	1	0	0	0	0	0	0	0	0	0	0	0	0	0	0	0	0	0	0	0	0	0	0	0	0	0	0	0	0	0
363	AX-147226178	Sten	A06	227.793	Aradu.A06	103181434	A06_103181434_Sten	-	1	1	1	1	1	1	1	1	1	1	1	1	0	0	0	0	0	0	0	0	0	0	0	0	0	0	0	0	0	0	0	0	0	0	0	0	0	0	0	0	0
364	AX-147226189	Sten	A06	229.193	Aradu.A06	103342388	A06_103342388_Sten	-	1	1	1	1	1	1	1	1	1	1	1	1	0	0	0	0	0	0	0	0	0	0	0	0	0	0	0	0	0	0	0	0	0	0	0	0	0	0	0	0	0
365	AX-147226332	Sten	A06	235.958	Aradu.A06	105470812	A06_105470812_Sten	-	1	1	1	1	1	1	1	1	1	1	1	1	0	0	0	0	0	0	0	0	0	0	0	0	0	0	0	0	0	0	0	0	0	0	0	0	0	0	0	0	0
366	AX-147226288	Sten	A06	237.825	Aradu.A06	105029082	A06_105029082_Sten	-	1	1	1	1	1	1	1	1	1	1	1	1	0	0	0	0	0	0	0	0	0	0	0	0	0	0	0	0	0	0	0	0	0	0	0	0	0	0	0	0	0
367	AX-147253944	Sten	A06	240.073	Aradu.A06	107413124	A06_107413124_Sten	-	1	1	1	1	1	1	1	1	1	1	1	1	0	0	0	0	0	0	0	0	0	0	0	0	0	0	0	0	0	0	0	0	0	0	0	0	0	0	0	0	0
368	AX-147226482	Sten	A06	242.441	Aradu.A06	107870484	A06_107870484_Sten	-	1	1	1	1	1	1	1	1	1	1	1	1	0	0	0	0	0	0	0	0	0	0	0	0	0	0	0	0	0	0	0	0	0	0	0	0	0	0	0	0	0
369	AX-147253814	Sten	A06	255.928	Aradu.A06	105027206	A06_105027206_Sten	-	1	1	1	1	1	1	1	1	1	1	1	1	0	0	0	0	0	0	0	0	0	0	0	0	0	0	0	0	0	0	0	0	0	0	0	0	0	0	0	0	0
370	AX-147254213	Sten	A06	285.407	Aradu.A06	110636050	A06_110636050_Sten	-	1	1	1	1	1	1	1	1	1	1	1	1	1	1	1	1	1	1	1	1	1	1	1	1	1	1	1	1	1	1	1	1	1	1	1	1	0	0	0	0	0
371	AX-147254245	Sten	A06	298.592	Aradu.A06	110930847	A06_110930847_Sten	-	1	1	1	1	1	1	1	1	1	1	1	1	0	0	0	0	0	0	0	0	0	0	0	0	0	0	0	0	0	0	0	0	0	0	0	0	0	0	0	0	0
372	AX-147226719	Sten	A06	300.222	Aradu.A06	110816722	A06_110816722_Sten	-	1	1	1	1	1	1	1	1	1	1	1	1	0	0	0	0	0	0	0	0	0	0	0	0	0	0	0	0	0	0	0	0	0	0	0	0	0	0	0	0	0
373	AX-147226720	Sten	A06	301.085	Aradu.A06	110820404	A06_110820404_Sten	-	1	1	1	1	1	1	1	1	1	1	1	1	0	0	0	0	0	0	0	0	0	0	0	0	0	0	0	0	0	0	0	0	0	0	0	0	0	0	0	0	0
374	AX-147226820	Sten	A06	312.155	Aradu.A06	112447942	A06_112447942_Sten	-	1	1	1	1	1	1	1	1	1	1	1	1	0	0	0	0	0	0	0	0	0	0	0	0	0	0	0	0	0	0	0	0	0	0	0	0	0	0	0	0	0
375	AX-147226816	Sten	A06	315.515	Aradu.A06	112388824	A06_112388824_Sten	-	1	1	1	1	1	1	1	1	1	1	1	1	0	0	0	0	0	0	0	0	0	0	0	0	0	0	0	0	0	0	0	0	0	0	0	0	0	0	0	0	0
376	AX-147227046	Sten	A07	0	Aradu.A07	2243719	A07_2243719_Sten	-	1	1	1	1	1	1	1	1	1	1	1	1	0	0	0	0	0	0	0	0	0	0	0	0	0	0	0	0	0	0	0	0	0	0	0	0	0	0	0	0	0
377	AX-147227238	Sten	A07	8.154	Aradu.A07	3807650	A07_3807650_Sten	-	1	1	1	1	1	1	1	1	1	1	1	1	0	0	0	0	0	0	0	0	0	0	0	0	0	0	0	0	0	0	0	0	0	0	0	0	0	0	0	0	0
378	AX-147227276	Sten	A07	9.937	Aradu.A07	4359598	A07_4359598_Sten	-	1	1	1	1	1	1	1	1	1	1	1	1	0	0	0	0	0	0	0	0	0	0	0	0	0	0	0	0	0	0	0	0	0	0	0	0	0	0	0	0	0
379	AX-147227304	Sten	A07	12.433	Aradu.A07	4510195	A07_4510195_Sten	-	1	1	1	1	1	1	1	1	1	1	1	1	0	0	0	0	0	0	0	0	0	0	0	0	0	0	0	0	0	0	0	0	0	0	0	0	0	0	0	0	0
380	AX-147227318	Sten	A07	14.848	Aradu.A07	4560066	A07_4560066_Sten	-	1	1	1	1	1	1	1	1	1	1	1	1	0	0	0	0	0	0	0	0	0	0	0	0	0	0	0	0	0	0	0	0	0	0	0	0	0	0	0	0	0
381	AX-147227391	Sten	A07	18.22	Aradu.A07	5372319	A07_5372319_Sten	-	1	1	1	1	1	1	1	1	1	1	1	1	0	0	0	0	0	0	0	0	0	0	0	0	0	0	0	0	0	0	0	0	0	0	0	0	0	0	0	0	0
382	AX-147227390	Sten	A07	31.088	Aradu.A07	5364934	A07_5364934_Sten	-	1	1	1	1	1	1	1	1	1	1	1	1	0	0	0	0	0	0	0	0	0	0	0	0	0	0	0	0	0	0	0	0	0	0	0	0	0	0	0	0	0
383	AX-147227409	Sten	A07	36.824	Aradu.A07	5513063	A07_5513063_Sten	-	1	1	1	1	1	1	1	1	1	1	1	1	0	0	0	0	0	0	0	0	0	0	0	0	0	0	0	0	0	0	0	0	0	0	0	0	0	0	0	0	0
384	AX-147227491	Sten	A07	41.396	Aradu.A07	6626371	A07_6626371_Sten	-	1	1	1	1	1	1	1	1	1	1	1	1	0	0	0	0	0	0	0	0	0	0	0	0	0	0	0	0	0	0	0	0	0	0	0	0	0	0	0	0	0
385	AX-147227580	Sten	A07	56.379	Aradu.A07	8218053	A07_8218053_Sten	-	1	1	1	1	1	1	1	1	1	1	1	1	0	0	0	0	0	0	0	0	0	0	0	0	0	0	0	0	0	0	0	0	0	0	0	0	0	0	0	0	0
386	AX-147227676	Sten	A07	63.562	Aradu.A07	10930537	A07_10930537_Sten	-	1	1	1	1	1	1	1	1	1	1	1	1	0	0	0	0	0	0	0	0	0	0	0	0	0	0	0	0	0	0	0	0	0	0	0	0	0	0	0	0	0
387	AX-147227821	Sten	A07	69.611	Aradu.A07	14699755	A07_14699755_Sten	-	1	1	1	1	1	1	1	1	1	1	1	1	0	0	0	0	0	0	0	0	0	0	0	0	0	0	0	0	0	0	0	0	0	0	0	0	0	0	0	0	0
388	AX-147227840	Sten	A07	71.635	Aradu.A07	15199143	A07_15199143_Sten	-	1	1	1	1	1	1	1	1	1	1	1	1	0	0	0	0	0	0	0	0	0	0	0	0	0	0	0	0	0	0	0	0	0	0	0	0	0	0	0	0	0
389	AX-147227834	Sten	A07	72.931	Aradu.A07	14860341	A07_14860341_Sten	-	1	1	1	1	1	1	1	1	1	1	1	1	0	0	0	0	0	0	0	0	0	0	0	0	0	0	0	0	0	0	0	0	0	0	0	0	0	0	0	0	0
390	AX-147227833	Sten	A07	73.796	Aradu.A07	14860287	A07_14860287_Sten	-	1	1	1	1	1	1	1	1	1	1	1	1	0	0	0	0	0	0	0	0	0	0	0	0	0	0	0	0	0	0	0	0	0	0	0	0	0	0	0	0	0
391	AX-147227917	Sten	A07	75.695	Aradu.A07	17133488	A07_17133488_Sten	-	1	1	1	1	1	1	1	1	1	1	1	1	0	0	0	0	0	0	0	0	0	0	0	0	0	0	0	0	0	0	0	0	0	0	0	0	0	0	0	0	0
392	AX-147227930	Sten	A07	77.553	Aradu.A07	17768688	A07_17768688_Sten	-	1	1	1	1	1	1	1	1	1	1	1	1	0	0	0	0	0	0	0	0	0	0	0	0	0	0	0	0	0	0	0	0	0	0	0	0	0	0	0	0	0
393	AX-147227919	Sten	A07	78.627	Aradu.A07	17218154	A07_17218154_Sten	-	1	1	1	1	1	1	1	1	1	1	1	1	0	0	0	0	0	0	0	0	0	0	0	0	0	0	0	0	0	0	0	0	0	0	0	0	0	0	0	0	0
394	AX-147228073	Sten	A07	83.776	Aradu.A07	23988146	A07_23988146_Sten	-	1	1	1	1	1	1	1	1	1	1	1	1	0	0	0	0	0	0	0	0	0	0	0	0	0	0	0	0	0	0	0	0	0	0	0	0	0	0	0	0	0
395	AX-147228146	Sten	A07	96.021	Aradu.A07	28320911	A07_28320911_Sten	-	1	1	1	1	1	1	1	1	1	1	1	1	0	0	0	0	0	0	0	0	0	0	0	0	0	0	0	0	0	0	0	0	0	0	0	0	0	0	0	0	0
396	AX-147228139	Sten	A07	96.591	Aradu.A07	28119195	A07_28119195_Sten	-	1	1	1	1	1	1	1	1	1	1	1	1	0	0	0	0	0	0	0	0	0	0	0	0	0	0	0	0	0	0	0	0	0	0	0	0	0	0	0	0	0
397	AX-147228270	Sten	A07	98.771	Aradu.A07	38770197	A07_38770197_Sten	-	1	1	1	1	1	1	1	1	1	1	1	1	0	0	0	0	0	0	0	0	0	0	0	0	0	0	0	0	0	0	0	0	0	0	0	0	0	0	0	0	0
398	AX-147228382	Sten	A07	100.747	Aradu.A07	49949867	A07_49949867_Sten	-	1	1	1	1	1	1	1	1	1	1	1	1	0	0	0	0	0	0	0	0	0	0	0	0	0	0	0	0	0	0	0	0	0	0	0	0	0	0	0	0	0
399	AX-147228528	Sten	A07	108.288	Aradu.A07	58426772	A07_58426772_Sten	-	1	1	1	1	1	1	1	1	1	1	1	1	0	0	0	0	0	0	0	0	0	0	0	0	0	0	0	0	0	0	0	0	0	0	0	0	0	0	0	0	0
400	AX-147228550	Sten	A07	108.806	Aradu.A07	60064185	A07_60064185_Sten	-	1	1	1	1	1	1	1	1	1	1	1	1	0	0	0	0	0	0	0	0	0	0	0	0	0	0	0	0	0	0	0	0	0	0	0	0	0	0	0	0	0
401	AX-147228566	Sten	A07	109.811	Aradu.A07	61354243	A07_61354243_Sten	-	1	1	1	1	1	1	1	1	1	1	1	1	0	0	0	0	0	0	0	0	0	0	0	0	0	0	0	0	0	0	0	0	0	0	0	0	0	0	0	0	0
402	AX-147228576	Sten	A07	111.159	Aradu.A07	62398239	A07_62398239_Sten	-	1	1	1	1	1	1	1	1	1	1	1	1	0	0	0	0	0	0	0	0	0	0	0	0	0	0	0	0	0	0	0	0	0	0	0	0	0	0	0	0	0
403	AX-147228634	Sten	A07	112.043	Aradu.A07	65957786	A07_65957786_Sten	-	1	1	1	1	1	1	1	1	1	1	1	1	0	0	0	0	0	0	0	0	0	0	0	0	0	0	0	0	0	0	0	0	0	0	0	0	0	0	0	0	0
404	AX-147228658	Sten	A07	115.093	Aradu.A07	67162381	A07_67162381_Sten	-	1	1	1	1	1	1	1	1	1	1	1	1	0	0	0	0	0	0	0	0	0	0	0	0	0	0	0	0	0	0	0	0	0	0	0	0	0	0	0	0	0
405	AX-147228759	Sten	A07	116.666	Aradu.A07	70123570	A07_70123570_Sten	-	1	1	1	1	1	1	1	1	1	1	1	1	0	0	0	0	0	0	0	0	0	0	0	0	0	0	0	0	0	0	0	0	0	0	0	0	0	0	0	0	0
406	AX-147228738	Sten	A07	117.638	Aradu.A07	69596041	A07_69596041_Sten	-	1	1	1	1	1	1	1	1	1	1	1	1	0	0	0	0	0	0	0	0	0	0	0	0	0	0	0	0	0	0	0	0	0	0	0	0	0	0	0	0	0
407	AX-147228199	Sten	A07	119.556	Aradu.A07	34519088	A07_34519088_Sten	-	1	1	1	1	1	1	1	1	1	1	1	1	0	0	0	0	0	0	0	0	0	0	0	0	0	0	0	0	0	0	0	0	0	0	0	0	0	0	0	0	0
408	AX-147228204	Sten	A07	119.871	Aradu.A07	34529379	A07_34529379_Sten	-	1	1	1	1	1	1	1	1	1	1	1	1	0	0	0	0	0	0	0	0	0	0	0	0	0	0	0	0	0	0	0	0	0	0	0	0	0	0	0	0	0
409	AX-147229124	Sten	A07	120.938	Aradu.A07	78927561	A07_78927561_Sten	-	1	1	1	1	1	1	1	1	1	1	1	1	0	0	0	0	0	0	0	0	0	0	0	0	0	0	0	0	0	0	0	0	0	0	0	0	0	0	0	0	0
410	AX-147229051	Sten	A07	126.477	Aradu.A07	76344679	A07_76344679_Sten	-	1	1	1	1	1	1	1	1	1	1	1	1	0	0	0	0	0	0	0	0	0	0	0	0	0	0	0	0	0	0	0	0	0	0	0	0	0	0	0	0	0
411	AX-147229019	Sten	A07	131.076	Aradu.A07	75747120	A07_75747120_Sten	-	1	1	1	1	1	1	1	1	1	1	1	1	0	0	0	0	0	0	0	0	0	0	0	0	0	0	0	0	0	0	0	0	0	0	0	0	0	0	0	0	0
412	AX-147228983	Sten	A07	132.909	Aradu.A07	74520368	A07_74520368_Sten	-	1	1	1	1	1	1	1	1	1	1	1	1	0	0	0	0	0	0	0	0	0	0	0	0	0	0	0	0	0	0	0	0	0	0	0	0	0	0	0	0	0
413	AX-147228871	Sten	A07	146.645	Aradu.A07	72384114	A07_72384114_Sten	-	1	1	1	1	1	1	1	1	1	1	1	1	0	0	0	0	0	0	0	0	0	0	0	0	0	0	0	0	0	0	0	0	0	0	0	0	0	0	0	0	0
414	AX-147256944	Sten	A07	153.119	Aradu.A07	71736426	A07_71736426_Sten	-	1	1	1	1	1	1	1	1	1	1	1	1	1	1	1	1	1	1	1	1	1	1	1	1	0	1	0	1	0	1	0	1	0	1	0	1	1	1	1	1	1
415	AX-147228816	Sten	A07	154.268	Aradu.A07	71618950	A07_71618950_Sten	-	1	1	1	1	1	1	1	1	1	1	1	1	0	0	0	0	0	0	0	0	0	0	0	0	0	0	0	0	0	0	0	0	0	0	0	0	0	0	0	0	0
416	AX-147228802	Sten	A07	158.431	Aradu.A07	71474572	A07_71474572_Sten	-	1	1	1	1	1	1	1	1	1	1	1	1	0	0	0	0	0	0	0	0	0	0	0	0	0	0	0	0	0	0	0	0	0	0	0	0	0	0	0	0	0
417	AX-147228791	Sten	A07	159.639	Aradu.A07	71387264	A07_71387264_Sten	-	1	1	1	1	1	1	1	1	1	1	1	1	0	0	0	0	0	0	0	0	0	0	0	0	0	0	0	0	0	0	0	0	0	0	0	0	0	0	0	0	0
418	AX-147228785	Sten	A07	165.575	Aradu.A07	71124776	A07_71124776_Sten	-	1	1	1	1	1	1	1	1	1	1	1	1	0	0	0	0	0	0	0	0	0	0	0	0	0	0	0	0	0	0	0	0	0	0	0	0	0	0	0	0	0
419	AX-147228782	Sten	A07	166.136	Aradu.A07	71054281	A07_71054281_Sten	-	1	1	1	1	1	1	1	1	1	1	1	1	0	0	0	0	0	0	0	0	0	0	0	0	0	0	0	0	0	0	0	0	0	0	0	0	0	0	0	0	0
420	AX-147228764	Sten	A07	167.497	Aradu.A07	70619039	A07_70619039_Sten	-	1	1	1	1	1	1	1	1	1	1	1	1	0	0	0	0	0	0	0	0	0	0	0	0	0	0	0	0	0	0	0	0	0	0	0	0	0	0	0	0	0
421	AX-147229294	Sten	A08	9.676	Aradu.A08	4139896	A08_4139896_Sten	-	1	1	1	1	1	1	1	1	1	1	1	1	0	0	0	0	0	0	0	0	0	0	0	0	0	0	0	0	0	0	0	0	0	0	0	0	0	0	0	0	0
422	AX-147229346	Sten	A08	15.509	Aradu.A08	4440864	A08_4440864_Sten	-	1	1	1	1	1	1	1	1	1	1	1	1	0	0	0	0	0	0	0	0	0	0	0	0	0	0	0	0	0	0	0	0	0	0	0	0	0	0	0	0	0
423	AX-147255729	Sten	A08	16.979	Araip.B07•	52594790	B07•_52594790_Sten	-	1	1	1	1	1	1	1	1	1	1	1	1	0	0	0	0	0	0	0	0	0	0	0	0	0	0	0	0	0	0	0	0	0	0	0	0	0	0	0	0	0
424	AX-147229479	Sten	A08	17.842	Aradu.A08	5572280	A08_5572280_Sten	-	1	1	1	1	1	1	1	1	1	1	1	1	0	0	0	0	0	0	0	0	0	0	0	0	0	0	0	0	0	0	0	0	0	0	0	0	0	0	0	0	0
425	AX-147229410	Sten	A08	18.423	Aradu.A08	4910322	A08_4910322_Sten	-	1	1	1	1	1	1	1	1	1	1	1	1	0	0	0	0	0	0	0	0	0	0	0	0	0	0	0	0	0	0	0	0	0	0	0	0	0	0	0	0	0
426	AX-147229481	Sten	A08	20.248	Aradu.A08	5572430	A08_5572430_Sten	-	1	1	1	1	1	1	1	1	1	1	1	1	0	0	0	0	0	0	0	0	0	0	0	0	0	0	0	0	0	0	0	0	0	0	0	0	0	0	0	0	0
427	AX-147229642	Sten	A08	27.122	Aradu.A08	7337536	A08_7337536_Sten	-	1	1	1	1	1	1	1	1	1	1	1	1	0	0	0	0	0	0	0	0	0	0	0	0	0	0	0	0	0	0	0	0	0	0	0	0	0	0	0	0	0
428	AX-147229709	Sten	A08	32.761	Aradu.A08	8571791	A08_8571791_Sten	-	1	1	1	1	1	1	1	1	1	1	1	1	0	0	0	0	0	0	0	0	0	0	0	0	0	0	0	0	0	0	0	0	0	0	0	0	0	0	0	0	0
429	AX-147229729	Sten	A08	36.86	Aradu.A08	8966026	A08_8966026_Sten	-	1	1	1	1	1	1	1	1	1	1	1	1	0	0	0	0	0	0	0	0	0	0	0	0	0	0	0	0	0	0	0	0	0	0	0	0	0	0	0	0	0
430	AX-147229740	Sten	A08	39.543	Aradu.A08	9346039	A08_9346039_Sten	-	1	1	1	1	1	1	1	1	1	1	1	1	0	0	0	0	0	0	0	0	0	0	0	0	0	0	0	0	0	0	0	0	0	0	0	0	0	0	0	0	0
431	AX-147229745	Sten	A08	42.367	Aradu.A08	9360099	A08_9360099_Sten	-	1	1	1	1	1	1	1	1	1	1	1	1	0	0	0	0	0	0	0	0	0	0	0	0	0	0	0	0	0	0	0	0	0	0	0	0	0	0	0	0	0
432	AX-147229763	Sten	A08	47.185	Aradu.A08	10011940	A08_10011940_Sten	-	1	1	1	1	1	1	1	1	1	1	1	1	0	0	0	0	0	0	0	0	0	0	0	0	0	0	0	0	0	0	0	0	0	0	0	0	0	0	0	0	0
433	AX-147229769	Sten	A08	51.479	Aradu.A08	10231063	A08_10231063_Sten	-	1	1	1	1	1	1	1	1	1	1	1	1	0	0	0	0	0	0	0	0	0	0	0	0	0	0	0	0	0	0	0	0	0	0	0	0	0	0	0	0	0
434	AX-147229813	Sten	A08	52.251	Aradu.A08	11067219	A08_11067219_Sten	-	1	1	1	1	1	1	1	1	1	1	1	1	0	0	0	0	0	0	0	0	0	0	0	0	0	0	0	0	0	0	0	0	0	0	0	0	0	0	0	0	0
435	AX-147229845	Sten	A08	55.63	Aradu.A08	11536813	A08_11536813_Sten	-	1	1	1	1	1	1	1	1	1	1	1	1	0	0	0	0	0	0	0	0	0	0	0	0	0	0	0	0	0	0	0	0	0	0	0	0	0	0	0	0	0
436	AX-147229882	Sten	A08	60.104	Aradu.A08	12093185	A08_12093185_Sten	-	1	1	1	1	1	1	1	1	1	1	1	1	0	0	0	0	0	0	0	0	0	0	0	0	0	0	0	0	0	0	0	0	0	0	0	0	0	0	0	0	0
437	AX-147229852	Sten	A08	61.054	Aradu.A08	11713918	A08_11713918_Sten	-	1	1	1	1	1	1	1	1	1	1	1	1	0	0	0	0	0	0	0	0	0	0	0	0	0	0	0	0	0	0	0	0	0	0	0	0	0	0	0	0	0
438	AX-147229917	Sten	A08	62.69	Aradu.A08	12912372	A08_12912372_Sten	-	1	1	1	1	1	1	1	1	1	1	1	1	0	0	0	0	0	0	0	0	0	0	0	0	0	0	0	0	0	0	0	0	0	0	0	0	0	0	0	0	0
439	AX-147229992	Sten	A08	63.717	Aradu.A08	14297495	A08_14297495_Sten	-	1	1	1	1	1	1	1	1	1	1	1	1	0	0	0	0	0	0	0	0	0	0	0	0	0	0	0	0	0	0	0	0	0	0	0	0	0	0	0	0	0
440	AX-147230049	Sten	A08	64.489	Aradu.A08	15036606	A08_15036606_Sten	-	1	1	1	1	1	1	1	1	1	1	1	1	0	0	0	0	0	0	0	0	0	0	0	0	0	0	0	0	0	0	0	0	0	0	0	0	0	0	0	0	0
441	AX-147230108	Sten	A08	66.814	Aradu.A08	15660388	A08_15660388_Sten	-	1	1	1	1	1	1	1	1	1	1	1	1	0	0	0	0	0	0	0	0	0	0	0	0	0	0	0	0	0	0	0	0	0	0	0	0	0	0	0	0	0
442	AX-147230087	Sten	A08	67.365	Aradu.A08	15257443	A08_15257443_Sten	-	1	1	1	1	1	1	1	1	1	1	1	1	0	0	0	0	0	0	0	0	0	0	0	0	0	0	0	0	0	0	0	0	0	0	0	0	0	0	0	0	0
443	AX-147230121	Sten	A08	68.361	Aradu.A08	15977007	A08_15977007_Sten	-	1	1	1	1	1	1	1	1	1	1	1	1	0	0	0	0	0	0	0	0	0	0	0	0	0	0	0	0	0	0	0	0	0	0	0	0	0	0	0	0	0
444	AX-147230197	Sten	A08	72.155	Aradu.A08	16894853	A08_16894853_Sten	-	1	1	1	1	1	1	1	1	1	1	1	1	0	0	0	0	0	0	0	0	0	0	0	0	0	0	0	0	0	0	0	0	0	0	0	0	0	0	0	0	0
445	AX-147230223	Sten	A08	73.836	Aradu.A08	17706521	A08_17706521_Sten	-	1	1	1	1	1	1	1	1	1	1	1	1	0	0	0	0	0	0	0	0	0	0	0	0	0	0	0	0	0	0	0	0	0	0	0	0	0	0	0	0	0
446	AX-147230224	Sten	A08	74.163	Aradu.A08	17707100	A08_17707100_Sten	-	1	1	1	1	1	1	1	1	1	1	1	1	0	0	0	0	0	0	0	0	0	0	0	0	0	0	0	0	0	0	0	0	0	0	0	0	0	0	0	0	0
447	AX-147230319	Sten	A08	77.569	Aradu.A08	23241307	A08_23241307_Sten	-	1	1	1	1	1	1	1	1	1	1	1	1	0	0	0	0	0	0	0	0	0	0	0	0	0	0	0	0	0	0	0	0	0	0	0	0	0	0	0	0	0
448	AX-147230422	Sten	A08	80.334	Aradu.A08	25003355	A08_25003355_Sten	-	1	1	1	1	1	1	1	1	1	1	1	1	0	0	0	0	0	0	0	0	0	0	0	0	0	0	0	0	0	0	0	0	0	0	0	0	0	0	0	0	0
449	AX-147230432	Sten	A08	81.189	Aradu.A08	25082727	A08_25082727_Sten	-	1	1	1	1	1	1	1	1	1	1	1	1	0	0	0	0	0	0	0	0	0	0	0	0	0	0	0	0	0	0	0	0	0	0	0	0	0	0	0	0	0
450	AX-147230437	Sten	A08	83.106	Aradu.A08	25180600	A08_25180600_Sten	-	1	1	1	1	1	1	1	1	1	1	1	1	0	0	0	0	0	0	0	0	0	0	0	0	0	0	0	0	0	0	0	0	0	0	0	0	0	0	0	0	0
451	AX-147230473	Sten	A08	84.788	Aradu.A08	25916804	A08_25916804_Sten	-	1	1	1	1	1	1	1	1	1	1	1	1	0	0	0	0	0	0	0	0	0	0	0	0	0	0	0	0	0	0	0	0	0	0	0	0	0	0	0	0	0
452	AX-147230499	Sten	A08	92.471	Aradu.A08	26344960	A08_26344960_Sten	-	1	1	1	1	1	1	1	1	1	1	1	1	0	0	0	0	0	0	0	0	0	0	0	0	0	0	0	0	0	0	0	0	0	0	0	0	0	0	0	0	0
453	AX-147230507	Sten	A08	96.373	Aradu.A08	26553699	A08_26553699_Sten	-	1	1	1	1	1	1	1	1	1	1	1	1	0	0	0	0	0	0	0	0	0	0	0	0	0	0	0	0	0	0	0	0	0	0	0	0	0	0	0	0	0
454	AX-147230532	Sten	A08	97.298	Aradu.A08	27221774	A08_27221774_Sten	-	1	1	1	1	1	1	1	1	1	1	1	1	0	0	0	0	0	0	0	0	0	0	0	0	0	0	0	0	0	0	0	0	0	0	0	0	0	0	0	0	0
455	AX-147230636	Sten	A08	107.378	Aradu.A08	29019016	A08_29019016_Sten	-	1	1	1	1	1	1	1	1	1	1	1	1	0	0	0	0	0	0	0	0	0	0	0	0	0	0	0	0	0	0	0	0	0	0	0	0	0	0	0	0	0
456	AX-147230672	Sten	A08	109.515	Aradu.A08	29666660	A08_29666660_Sten	-	1	1	1	1	1	1	1	1	1	1	1	1	0	0	0	0	0	0	0	0	0	0	0	0	0	0	0	0	0	0	0	0	0	0	0	0	0	0	0	0	0
457	AX-147231077	Sten	A08	140.071	Aradu.A08	37475975	A08_37475975_Sten	-	1	1	1	1	1	1	1	1	1	1	1	1	0	0	0	0	0	0	0	0	0	0	0	0	0	0	0	0	0	0	0	0	0	0	0	0	0	0	0	0	0
458	AX-147231118	Sten	A08	144.149	Aradu.A08	38153059	A08_38153059_Sten	-	1	1	1	1	1	1	1	1	1	1	1	1	0	0	0	0	0	0	0	0	0	0	0	0	0	0	0	0	0	0	0	0	0	0	0	0	0	0	0	0	0
459	AX-147231126	Sten	A08	146.589	Aradu.A08	38180605	A08_38180605_Sten	-	1	1	1	1	1	1	1	1	1	1	1	1	0	0	0	0	0	0	0	0	0	0	0	0	0	0	0	0	0	0	0	0	0	0	0	0	0	0	0	0	0
460	AX-147231135	Sten	A08	147.362	Aradu.A08	38254290	A08_38254290_Sten	-	1	1	1	1	1	1	1	1	1	1	1	1	0	0	0	0	0	0	0	0	0	0	0	0	0	0	0	0	0	0	0	0	0	0	0	0	0	0	0	0	0
461	AX-147231148	Sten	A08	147.64	Aradu.A08	38319070	A08_38319070_Sten	-	1	1	1	1	1	1	1	1	1	1	1	1	0	0	0	0	0	0	0	0	0	0	0	0	0	0	0	0	0	0	0	0	0	0	0	0	0	0	0	0	0
462	AX-147231206	Sten	A08	149.967	Aradu.A08	39208957	A08_39208957_Sten	-	1	1	1	1	1	1	1	1	1	1	1	1	0	0	0	0	0	0	0	0	0	0	0	0	0	0	0	0	0	0	0	0	0	0	0	0	0	0	0	0	0
463	AX-147231204	Sten	A08	149.967	Aradu.A08	39171433	A08_39171433_Sten	-	1	1	1	1	1	1	1	1	1	1	1	1	0	0	0	0	0	0	0	0	0	0	0	0	0	0	0	0	0	0	0	0	0	0	0	0	0	0	0	0	0
464	AX-147258789	Sten	A08	150.551	Aradu.A08	39271659	A08_39271659_Sten	-	1	1	1	1	1	1	1	1	1	1	1	1	0	0	0	0	0	0	0	0	0	0	0	0	0	0	0	0	0	0	0	0	0	0	0	0	0	0	0	0	0
465	AX-147231272	Sten	A08	152.248	Aradu.A08	40053900	A08_40053900_Sten	-	1	1	1	1	1	1	1	1	1	1	1	1	0	0	0	0	0	0	0	0	0	0	0	0	0	0	0	0	0	0	0	0	0	0	0	0	0	0	0	0	0
466	AX-147231307	Sten	A08	155.715	Aradu.A08	40886460	A08_40886460_Sten	-	1	1	1	1	1	1	1	1	1	1	1	1	0	0	0	0	0	0	0	0	0	0	0	0	0	0	0	0	0	0	0	0	0	0	0	0	0	0	0	0	0
467	AX-147258971	Sten	A08	163.225	Aradu.A08	41498936	A08_41498936_Sten	-	1	1	1	1	1	1	1	1	1	1	1	1	0	0	0	0	0	0	0	0	0	0	0	0	0	0	0	0	0	0	0	0	0	0	0	0	0	0	0	0	0
468	AX-147231410	Sten	A08	164.066	Aradu.A08	42383674	A08_42383674_Sten	-	1	1	1	1	1	1	1	1	1	1	1	1	0	0	0	0	0	0	0	0	0	0	0	0	0	0	0	0	0	0	0	0	0	0	0	0	0	0	0	0	0
469	AX-147231500	Sten	A08	167.52	Aradu.A08	43354782	A08_43354782_Sten	-	1	1	1	1	1	1	1	1	1	1	1	1	0	0	0	0	0	0	0	0	0	0	0	0	0	0	0	0	0	0	0	0	0	0	0	0	0	0	0	0	0
470	AX-147231647	Sten	A08	173.958	Aradu.A08	44987016	A08_44987016_Sten	-	1	1	1	1	1	1	1	1	1	1	1	1	0	0	0	0	0	0	0	0	0	0	0	0	0	0	0	0	0	0	0	0	0	0	0	0	0	0	0	0	0
471	AX-147231716	Sten	A08	175.828	Aradu.A08	45750189	A08_45750189_Sten	-	1	1	1	1	1	1	1	1	1	1	1	1	0	0	0	0	0	0	0	0	0	0	0	0	0	0	0	0	0	0	0	0	0	0	0	0	0	0	0	0	0
472	AX-147231795	Sten	A08	177.436	Aradu.A08	46292805	A08_46292805_Sten	-	1	1	1	1	1	1	1	1	1	1	1	1	0	0	0	0	0	0	0	0	0	0	0	0	0	0	0	0	0	0	0	0	0	0	0	0	0	0	0	0	0
473	AX-147231809	Sten	A08	180.389	Aradu.A08	46433006	A08_46433006_Sten	-	1	1	1	1	1	1	1	1	1	1	1	1	0	0	0	0	0	0	0	0	0	0	0	0	0	0	0	0	0	0	0	0	0	0	0	0	0	0	0	0	0
474	AX-147231877	Sten	A08	186.344	Aradu.A08	47539275	A08_47539275_Sten	-	1	1	1	1	1	1	1	1	1	1	1	1	0	0	0	0	0	0	0	0	0	0	0	0	0	0	0	0	0	0	0	0	0	0	0	0	0	0	0	0	0
475	AX-147231933	Sten	A08	189.878	Aradu.A08	48256544	A08_48256544_Sten	-	1	1	1	1	1	1	1	1	1	1	1	1	0	0	0	0	0	0	0	0	0	0	0	0	0	0	0	0	0	0	0	0	0	0	0	0	0	0	0	0	0
476	AX-147216850	Sten	A08	201.291	Aradu.A03	40250685	A03_40250685_Sten	-	1	1	1	1	1	1	1	1	1	1	1	1	0	0	0	0	0	0	0	0	0	0	0	0	0	0	0	0	0	0	0	0	0	0	0	0	0	0	0	0	0
477	AX-147216800	Sten	A08	203.994	Aradu.A03	39879307	A03_39879307_Sten	-	1	1	1	1	1	1	1	1	1	1	1	1	0	0	0	0	0	0	0	0	0	0	0	0	0	0	0	0	0	0	0	0	0	0	0	0	0	0	0	0	0
478	AX-147232070	Sten	A09	0	Aradu.A09	367305	A09_367305_Sten	-	1	1	1	1	1	1	1	1	1	1	1	1	0	0	0	0	0	0	0	0	0	0	0	0	0	0	0	0	0	0	0	0	0	0	0	0	0	0	0	0	0
479	AX-147234444	Sten	A09	1.865	Aradu.A09	115268602	A09_115268602_Sten	-	1	1	1	1	1	1	1	1	1	1	1	1	0	0	0	0	0	0	0	0	0	0	0	0	0	0	0	0	0	0	0	0	0	0	0	0	0	0	0	0	0
480	AX-147232213	Sten	A09	19.013	Aradu.A09	2002461	A09_2002461_Sten	-	1	1	1	1	1	1	1	1	1	1	1	1	0	0	0	0	0	0	0	0	0	0	0	0	0	0	0	0	0	0	0	0	0	0	0	0	0	0	0	0	0
481	AX-147232337	Sten	A09	28.317	Aradu.A09	3427133	A09_3427133_Sten	-	1	1	1	1	1	1	1	1	1	1	1	1	0	0	0	0	0	0	0	0	0	0	0	0	0	0	0	0	0	0	0	0	0	0	0	0	0	0	0	0	0
482	AX-147223242	Sten	A09	43.731	Aradu.A05	92835506	A05_92835506_Sten	-	1	1	1	1	1	1	1	1	1	1	1	1	0	0	0	0	0	0	0	0	0	0	0	0	0	0	0	0	0	0	0	0	0	0	0	0	0	0	0	0	0
483	AX-147232596	Sten	A09	44.4	Aradu.A09	7750844	A09_7750844_Sten	-	1	1	1	1	1	1	1	1	1	1	1	1	0	0	0	0	0	0	0	0	0	0	0	0	0	0	0	0	0	0	0	0	0	0	0	0	0	0	0	0	0
484	AX-147232700	Sten	A09	44.735	Aradu.A09	9827232	A09_9827232_Sten	-	1	1	1	1	1	1	1	1	1	1	1	1	0	0	0	0	0	0	0	0	0	0	0	0	0	0	0	0	0	0	0	0	0	0	0	0	1	1	1	1	1
485	AX-147232740	Sten	A09	47.285	Aradu.A09	10442851	A09_10442851_Sten	-	1	1	1	1	1	1	1	1	1	1	1	1	0	0	0	0	0	0	0	0	0	0	0	0	0	0	0	0	0	0	0	0	0	0	0	0	0	0	0	0	0
486	AX-147232597	Sten	A09	53.168	Aradu.A09	7755946	A09_7755946_Sten	-	1	1	1	1	1	1	1	1	1	1	1	1	0	0	0	0	0	0	0	0	0	0	0	0	0	0	0	0	0	0	0	0	0	0	0	0	0	0	0	0	0
487	AX-147232832	Sten	A09	64.991	Aradu.A09	13120048	A09_13120048_Sten	-	1	1	1	1	1	1	1	1	1	1	1	1	0	0	0	0	0	0	0	0	0	0	0	0	0	0	0	0	0	0	0	0	0	0	0	0	0	0	0	0	0
488	AX-147232906	Sten	A09	80.381	Aradu.A09	14385410	A09_14385410_Sten	-	1	1	1	1	1	1	1	1	1	1	1	1	0	0	0	0	0	0	0	0	0	0	0	0	0	0	0	0	0	0	0	0	0	0	0	0	0	0	0	0	0
489	AX-147232927	Sten	A09	81.73	Aradu.A09	15225814	A09_15225814_Sten	-	1	1	1	1	1	1	1	1	1	1	1	1	0	0	0	0	0	0	0	0	0	0	0	0	0	0	0	0	0	0	0	0	0	0	0	0	0	0	0	0	0
490	AX-147232952	Sten	A09	82.837	Aradu.A09	16472775	A09_16472775_Sten	-	1	1	1	1	1	1	1	1	1	1	1	1	0	0	0	0	0	0	0	0	0	0	0	0	0	0	0	0	0	0	0	0	0	0	0	0	1	1	1	1	1
491	AX-147211618	Sten	A09	83.184	Aradu.A01	87096975	A01_87096975_Sten	-	1	1	1	1	1	1	1	1	1	1	1	1	0	0	0	0	0	0	0	0	0	0	0	0	0	0	0	0	0	0	0	0	0	0	0	0	0	0	0	0	0
492	AX-147232981	Sten	A09	86.936	Aradu.A09	17033486	A09_17033486_Sten	-	1	1	1	1	1	1	1	1	1	1	1	1	0	0	0	0	0	0	0	0	0	0	0	0	0	0	0	0	0	0	0	0	0	0	0	0	0	0	0	0	0
493	AX-147232963	Sten	A09	88.075	Aradu.A09	16516448	A09_16516448_Sten	Designed, ordered & Used (TableS2)	1	1	1	1	1	1	1	1	1	1	1	1	0	0	0	0	0	0	0	0	0	0	0	0	0	0	0	0	0	0	0	0	0	0	0	0	0	0	0	0	0
494	AX-147233060	Sten	A09	89.556	Aradu.A09	19793596	A09_19793596_Sten	-	1	1	1	1	1	1	1	1	1	1	1	1	0	0	0	0	0	0	0	0	0	0	0	0	0	0	0	0	0	0	0	0	0	0	0	0	1	1	1	1	1
495	AX-147233083	Sten	A09	90.426	Aradu.A09	20493842	A09_20493842_Sten	-	1	1	1	1	1	1	1	1	1	1	1	1	0	0	0	0	0	0	0	0	0	0	0	0	0	0	0	0	0	0	0	0	0	0	0	0	1	1	1	1	1
496	AX-147233141	Sten	A09	91.86	Aradu.A09	25028543	A09_25028543_Sten	-	1	1	1	1	1	1	1	1	1	1	1	1	0	0	0	0	0	0	0	0	0	0	0	0	0	0	0	0	0	0	0	0	0	0	0	0	0	0	0	0	0
497	AX-147233238	Sten	A09	93.277	Aradu.A09	31075302	A09_31075302_Sten	-	1	1	1	1	1	1	1	1	1	1	1	1	0	0	0	0	0	0	0	0	0	0	0	0	0	0	0	0	0	0	0	0	0	0	0	0	0	0	0	0	0
498	AX-147233233	Sten	A09	93.277	Aradu.A09	30827063	A09_30827063_Sten	-	1	1	1	1	1	1	1	1	1	1	1	1	0	0	0	0	0	0	0	0	0	0	0	0	0	0	0	0	0	0	0	0	0	0	0	0	0	0	0	0	0
499	AX-147233235	Sten	A09	93.533	Aradu.A09	30830430	A09_30830430_Sten	-	1	1	1	1	1	1	1	1	1	1	1	1	0	0	0	0	0	0	0	0	0	0	0	0	0	0	0	0	0	0	0	0	0	0	0	0	0	0	0	0	0
500	AX-147233523	Sten	A09	121.845	Aradu.A09	79391871	A09_79391871_Sten	-	1	1	1	1	1	1	1	1	1	1	1	1	0	0	0	0	0	0	0	0	0	0	0	0	0	0	0	0	0	0	0	0	0	0	0	0	0	0	0	0	0
501	AX-147233267	Sten	A09	122.413	Aradu.A09	35915325	A09_35915325_Sten	-	1	1	1	1	1	1	1	1	1	1	1	1	0	0	0	0	0	0	0	0	0	0	0	0	0	0	0	0	0	0	0	0	0	0	0	0	0	0	0	0	0
502	AX-147233557	Sten	A09	124.94	Aradu.A09	83181734	A09_83181734_Sten	-	1	1	1	1	1	1	1	1	1	1	1	1	0	0	0	0	0	0	0	0	0	0	0	0	0	0	0	0	0	0	0	0	0	0	0	0	0	0	0	0	0
503	AX-147233608	Sten	A09	129.021	Aradu.A09	89947250	A09_89947250_Sten	-	1	1	1	1	1	1	1	1	1	1	1	1	0	0	0	0	0	0	0	0	0	0	0	0	0	0	0	0	0	0	0	0	0	0	0	0	0	0	0	0	0
504	AX-147233670	Sten	A09	130.837	Aradu.A09	94328792	A09_94328792_Sten	-	1	1	1	1	1	1	1	1	1	1	1	1	0	0	0	0	0	0	0	0	0	0	0	0	0	0	0	0	0	0	0	0	0	0	0	0	0	0	0	0	0
505	AX-147233882	Sten	A09	133.221	Aradu.A09	104646292	A09_104646292_Sten	-	1	1	1	1	1	1	1	1	1	1	1	1	0	0	0	0	0	0	0	0	0	0	0	0	0	0	0	0	0	0	0	0	0	0	0	0	0	0	0	0	0
506	AX-147233992	Sten	A09	135.279	Aradu.A09	109699138	A09_109699138_Sten	-	1	1	1	1	1	1	1	1	1	1	1	1	0	0	0	0	0	0	0	0	0	0	0	0	0	0	0	0	0	0	0	0	0	0	0	0	0	0	0	0	0
507	AX-147234195	Sten	A09	146.506	Aradu.A09	112245541	A09_112245541_Sten	-	1	1	1	1	1	1	1	1	1	1	1	1	0	0	0	0	0	0	0	0	0	0	0	0	0	0	0	0	0	0	0	0	0	0	0	0	1	1	1	1	1
508	AX-147234154	Sten	A09	149.63	Aradu.A09	111832126	A09_111832126_Sten	-	1	1	1	1	1	1	1	1	1	1	1	1	0	0	0	0	0	0	0	0	0	0	0	0	0	0	0	0	0	0	0	0	0	0	0	0	0	0	0	0	0
509	AX-147234200	Sten	A09	152.441	Aradu.A09	112309231	A09_112309231_Sten	Designed, ordered & Used (TableS2)	1	1	1	1	1	1	1	1	1	1	1	1	0	0	0	0	0	0	0	0	0	0	0	0	0	0	0	0	0	0	0	0	0	0	0	0	1	1	1	1	1
510	AX-147234221	Sten	A09	163.904	Aradu.A09	112542186	A09_112542186_Sten	-	1	1	1	1	1	1	1	1	1	1	1	1	0	0	0	0	0	0	0	0	0	0	0	0	0	0	0	0	0	0	0	0	0	0	0	0	0	0	0	0	0
511	AX-147234232	Sten	A09	164.172	Aradu.A09	112601285	A09_112601285_Sten	-	1	1	1	1	1	1	1	1	1	1	1	1	0	0	0	0	0	0	0	0	0	0	0	0	0	0	0	0	0	0	0	0	0	0	0	0	1	1	1	1	1
512	AX-147234310	Sten	A09	168.12	Aradu.A09	113470052	A09_113470052_Sten	-	1	1	1	1	1	1	1	1	1	1	1	1	0	0	0	0	0	0	0	0	0	0	0	0	0	0	0	0	0	0	0	0	0	0	0	0	0	0	0	0	0
513	AX-147234334	Sten	A09	171.636	Aradu.A09	113662975	A09_113662975_Sten	-	1	1	1	1	1	1	1	1	1	1	1	1	0	0	0	0	0	0	0	0	0	0	0	0	0	0	0	0	0	0	0	0	0	0	0	0	0	0	0	0	0
514	AX-147234385	Sten	A09	178.361	Aradu.A09	114515959	A09_114515959_Sten	Designed, ordered & Used (TableS2)	1	1	1	1	1	1	1	1	1	1	1	1	0	0	0	0	0	0	0	0	0	0	0	0	0	0	0	0	0	0	0	0	0	0	0	0	0	0	0	0	0
515	AX-147234393	Sten	A09	179.405	Aradu.A09	114681560	A09_114681560_Sten	-	1	1	1	1	1	1	1	1	1	1	1	1	0	0	0	0	0	0	0	0	0	0	0	0	0	0	0	0	0	0	0	0	0	0	0	0	0	0	0	0	0
516	AX-147234525	Sten	A09	184.488	Aradu.A09	115832113	A09_115832113_Sten	-	1	1	1	1	1	1	1	1	1	1	1	1	0	0	0	0	0	0	0	0	0	0	0	0	0	0	0	0	0	0	0	0	0	0	0	0	0	0	0	0	0
517	AX-147234599	Sten	A09	192.487	Aradu.A09	116627090	A09_116627090_Sten	-	1	1	1	1	1	1	1	1	1	1	1	1	0	0	0	0	0	0	0	0	0	0	0	0	0	0	0	0	0	0	0	0	0	0	0	0	0	0	0	0	0
518	AX-147234740	Sten	A09	212.961	Aradu.A09	118577665	A09_118577665_Sten	-	1	1	1	1	1	1	1	1	1	1	1	1	0	0	0	0	0	0	0	0	0	0	0	0	0	0	0	0	0	0	0	0	0	0	0	0	0	0	0	0	0
519	AX-147234752	Sten	A09	214.038	Aradu.A09	118682014	A09_118682014_Sten	-	1	1	1	1	1	1	1	1	1	1	1	1	0	0	0	0	0	0	0	0	0	0	0	0	0	0	0	0	0	0	0	0	0	0	0	0	0	0	0	0	0
520	AX-147234803	Sten	A09	222.49	Aradu.A09	119755761	A09_119755761_Sten	-	1	1	1	1	1	1	1	1	1	1	1	1	0	0	0	0	0	0	0	0	0	0	0	0	0	0	0	0	0	0	0	0	0	0	0	0	0	0	0	0	0
521	AX-147235204	Sten	A10	6.717	Aradu.A10	4951877	A10_4951877_Sten	-	1	1	1	1	1	1	1	1	1	1	1	1	0	0	0	0	0	0	0	0	0	0	0	0	0	0	0	0	0	0	0	0	0	0	0	0	0	0	0	0	0
522	AX-147235551	Sten	A10	35.403	Aradu.A10	12170279	A10_12170279_Sten	-	1	1	1	1	1	1	1	1	1	1	1	1	0	0	0	0	0	0	0	0	0	0	0	0	0	0	0	0	0	0	0	0	0	0	0	0	0	0	0	0	0
523	AX-147235670	Sten	A10	40.508	Aradu.A10	20471486	A10_20471486_Sten	-	1	1	1	1	1	1	1	1	1	1	1	1	0	0	0	0	0	0	0	0	0	0	0	0	0	0	0	0	0	0	0	0	0	0	0	0	0	0	0	0	0
524	AX-147235779	Sten	A10	45.471	Aradu.A10	30388204	A10_30388204_Sten	-	1	1	1	1	1	1	1	1	1	1	1	1	0	0	0	0	0	0	0	0	0	0	0	0	0	0	0	0	0	0	0	0	0	0	0	0	0	0	0	0	0
525	AX-147235962	Sten	A10	49.189	Aradu.A10	57722566	A10_57722566_Sten	-	1	1	1	1	1	1	1	1	1	1	1	1	0	0	0	0	0	0	0	0	0	0	0	0	0	0	0	0	0	0	0	0	0	0	0	0	0	0	0	0	0
526	AX-147236225	Sten	A10	53.528	Aradu.A10	84240906	A10_84240906_Sten	-	1	1	1	1	1	1	1	1	1	1	1	1	0	0	0	0	0	0	0	0	0	0	0	0	0	0	0	0	0	0	0	0	0	0	0	0	0	0	0	0	0
527	AX-147236291	Sten	A10	55.304	Aradu.A10	88475620	A10_88475620_Sten	-	1	1	1	1	1	1	1	1	1	1	1	1	0	0	0	0	0	0	0	0	0	0	0	0	0	0	0	0	0	0	0	0	0	0	0	0	0	0	0	0	0
528	AX-147236751	Sten	A10	78.542	Aradu.A10	102629772	A10_102629772_Sten	-	1	1	1	1	1	1	1	1	1	1	1	1	0	0	0	0	0	0	0	0	0	0	0	0	0	0	0	0	0	0	0	0	0	0	0	0	0	0	0	0	0
529	AX-147236821	Sten	A10	83.71	Aradu.A10	104138451	A10_104138451_Sten	-	1	1	1	1	1	1	1	1	1	1	1	1	0	0	0	0	0	0	0	0	0	0	0	0	0	0	0	0	0	0	0	0	0	0	0	0	0	0	0	0	0
530	AX-147236829	Sten	A10	85.341	Aradu.A10	104321878	A10_104321878_Sten	-	1	1	1	1	1	1	1	1	1	1	1	1	0	0	0	0	0	0	0	0	0	0	0	0	0	0	0	0	0	0	0	0	0	0	0	0	0	0	0	0	0
531	AX-147236836	Sten	A10	86.056	Aradu.A10	104350153	A10_104350153_Sten	-	1	1	1	1	1	1	1	1	1	1	1	1	0	0	0	0	0	0	0	0	0	0	0	0	0	0	0	0	0	0	0	0	0	0	0	0	0	0	0	0	0
532	AX-147236852	Sten	A10	87.215	Aradu.A10	104660224	A10_104660224_Sten	-	1	1	1	1	1	1	1	1	1	1	1	1	0	0	0	0	0	0	0	0	0	0	0	0	0	0	0	0	0	0	0	0	0	0	0	0	0	0	0	0	0
533	AX-147236910	Sten	A10	100.97	Aradu.A10	105330547	A10_105330547_Sten	-	1	1	1	1	1	1	1	1	1	1	1	1	0	0	0	0	0	0	0	0	0	0	0	0	0	0	0	0	0	0	0	0	0	0	0	0	0	0	0	0	0
534	AX-147237211	Sten	A10	132.057	Aradu.A10	107915486	A10_107915486_Sten	-	1	1	1	1	1	1	1	1	1	1	1	1	0	0	0	0	0	0	0	0	0	0	0	0	0	0	0	0	0	0	0	0	0	0	0	0	0	0	0	0	0
535	AX-147262806	Bat	B01	0	Araip.B10	482556	B10_482556_Bat	-	1	1	1	1	1	1	1	1	1	1	1	1	0	0	0	0	0	0	0	0	0	0	0	0	0	0	0	0	0	0	0	0	0	0	0	0	0	0	0	0	0
536	AX-147262784	Bat	B01	9.564	Araip.B10	289704	B10_289704_Bat	-	1	1	1	1	1	1	1	1	1	1	1	1	0	0	0	0	0	0	0	0	0	0	0	0	0	0	0	0	0	0	0	0	0	0	0	0	0	0	0	0	0
537	AX-147237531	Bat	B01	16.235	Araip.B01	1456707	B01_1456707_Bat	-	1	1	1	1	1	1	1	1	1	1	1	1	0	0	0	0	0	0	0	0	0	0	0	0	0	0	0	0	0	0	0	0	0	0	0	0	0	0	0	0	0
538	AX-147237499	Bat	B01	16.795	Araip.B01	1242964	B01_1242964_Bat	-	1	1	1	1	1	1	1	1	1	1	1	1	0	0	0	0	0	0	0	0	0	0	0	0	0	0	0	0	0	0	0	0	0	0	0	0	0	0	0	0	0
539	AX-147209912	Bat	B01	18.746	Araip.B01	673594	B01_673594_Bat	-	1	1	1	1	1	1	1	1	1	1	1	1	0	0	0	0	0	0	0	0	0	0	0	0	0	0	0	0	0	0	0	0	0	0	0	0	0	0	0	0	0
540	AX-147209918	Bat	B01	21.753	Araip.B01	637604	B01_637604_Bat	-	1	1	1	1	1	1	1	1	1	1	1	1	0	0	0	0	0	0	0	0	0	0	0	0	0	0	0	0	0	0	0	0	0	0	0	0	0	0	0	0	0
541	AX-147209994	Bat	B01	25.909	Araip.B01	259246	B01_259246_Bat	-	1	1	1	1	1	1	1	1	1	1	1	1	0	0	0	0	0	0	0	0	0	0	0	0	0	0	0	0	0	0	0	0	0	0	0	0	0	0	0	0	0
542	AX-147237408	Bat	B01	26.897	Araip.B01	241648	B01_241648_Bat	-	1	1	1	1	1	1	1	1	1	1	1	1	0	0	0	0	0	0	0	0	0	0	0	0	0	0	0	0	0	0	0	0	0	0	0	0	0	0	0	0	0
543	AX-147209161	Bat	B01	30.391	Araip.B01	2325984	B01_2325984_Bat	-	1	1	1	1	1	1	1	1	1	1	1	1	0	0	0	0	0	0	0	0	0	0	0	0	0	0	0	0	0	0	0	0	0	0	0	0	0	0	0	0	0
544	AX-147237610	Bat	B01	31.35	Araip.B01	2453789	B01_2453789_Bat	-	1	1	1	1	1	1	1	1	1	1	1	1	0	0	0	0	0	0	0	0	0	0	0	0	0	0	0	0	0	0	0	0	0	0	0	0	0	0	0	0	0
545	AX-147237628	Bat	B01	32.25	Araip.B01	2808780	B01_2808780_Bat	-	1	1	1	1	1	1	1	1	1	1	1	1	0	0	0	0	0	0	0	0	0	0	0	0	0	0	0	0	0	0	0	0	0	0	0	0	0	0	0	0	0
546	AX-147209041	Bat	B01	37.315	Araip.B01	3182980	B01_3182980_Bat	-	1	1	1	1	1	1	1	1	1	1	1	1	0	0	0	0	0	0	0	0	0	0	0	0	0	0	0	0	0	0	0	0	0	0	0	0	0	0	0	0	0
547	AX-147208994	Bat	B01	38.781	Araip.B01	3439059	B01_3439059_Bat	-	1	1	1	1	1	1	1	1	1	1	1	1	0	0	0	0	0	0	0	0	0	0	0	0	0	0	0	0	0	0	0	0	0	0	0	0	0	0	0	0	0
548	AX-147237689	Bat	B01	40.081	Araip.B01	3853031	B01_3853031_Bat	-	1	1	1	1	1	1	1	1	1	1	1	1	0	0	0	0	0	0	0	0	0	0	0	0	0	0	0	0	0	0	0	0	0	0	0	0	0	0	0	0	0
549	AX-147237688	Bat	B01	40.083	Araip.B01	3850724	B01_3850724_Bat	-	1	1	1	1	1	1	1	1	1	1	1	1	0	0	0	0	0	0	0	0	0	0	0	0	0	0	0	0	0	0	0	0	0	0	0	0	0	0	0	0	0
550	AX-147237708	Bat	B01	41.504	Araip.B01	4229707	B01_4229707_Bat	-	1	1	1	1	1	1	1	1	1	1	1	1	0	0	0	0	0	0	0	0	0	0	0	0	0	0	0	0	0	0	0	0	0	0	0	0	0	0	0	0	0
551	AX-147208810	Bat	B01	43.842	Araip.B01	4817802	B01_4817802_Bat	-	1	1	1	1	1	1	1	1	1	1	1	1	0	0	0	0	0	0	0	0	0	0	0	0	0	0	0	0	0	0	0	0	0	0	0	0	0	0	0	0	0
552	AX-147208775	Bat	B01	45.437	Araip.B01	4992265	B01_4992265_Bat	-	1	1	1	1	1	1	1	1	1	1	1	1	0	0	0	0	0	0	0	0	0	0	0	0	0	0	0	0	0	0	0	0	0	0	0	0	0	0	0	0	0
553	AX-147237900	Bat	B01	53.348	Araip.B01	8117561	B01_8117561_Bat	-	1	1	1	1	1	1	1	1	1	1	1	1	0	0	0	0	0	0	0	0	0	0	0	0	0	0	0	0	0	0	0	0	0	0	0	0	0	0	0	0	0
554	AX-147237897	Bat	B01	54.8	Araip.B01	8053505	B01_8053505_Bat	-	1	1	1	1	1	1	1	1	1	1	1	1	0	0	0	0	0	0	0	0	0	0	0	0	0	0	0	0	0	0	0	0	0	0	0	0	0	0	0	0	0
555	AX-147237927	Bat	B01	59.889	Araip.B01	9319416	B01_9319416_Bat	-	1	1	1	1	1	1	1	1	1	1	1	1	0	0	0	0	0	0	0	0	0	0	0	0	0	0	0	0	0	0	0	0	0	0	0	0	0	0	0	0	0
556	AX-147237943	Bat	B01	62.576	Araip.B01	9657890	B01_9657890_Bat	-	1	1	1	1	1	1	1	1	1	1	1	1	0	0	0	0	0	0	0	0	0	0	0	0	0	0	0	0	0	0	0	0	0	0	0	0	0	0	0	0	0
557	AX-147237957	Bat	B01	63.238	Araip.B01	10280566	B01_10280566_Bat	-	1	1	1	1	1	1	1	1	1	1	1	1	0	0	0	0	0	0	0	0	0	0	0	0	0	0	0	0	0	0	0	0	0	0	0	0	0	0	0	0	0
558	AX-147238003	Bat	B01	64.591	Araip.B01	11619714	B01_11619714_Bat	-	1	1	1	1	1	1	1	1	1	1	1	1	0	0	0	0	0	0	0	0	0	0	0	0	0	0	0	0	0	0	0	0	0	0	0	0	0	0	0	0	0
559	AX-147238154	Bat	B01	79.541	Araip.B01	16883698	B01_16883698_Bat	-	1	1	1	1	1	1	1	1	1	1	1	1	0	0	0	0	0	0	0	0	0	0	0	0	0	0	0	0	0	0	0	0	0	0	0	0	0	0	0	0	0
560	AX-147238184	Bat	B01	80.313	Araip.B01	17903230	B01_17903230_Bat	-	1	1	1	1	1	1	1	1	1	1	1	1	0	0	0	0	0	0	0	0	0	0	0	0	0	0	0	0	0	0	0	0	0	0	0	0	0	0	0	0	0
561	AX-147238182	Bat	B01	81.219	Araip.B01	17877473	B01_17877473_Bat	-	1	1	1	1	1	1	1	1	1	1	1	1	0	0	0	0	0	0	0	0	0	0	0	0	0	0	0	0	0	0	0	0	0	0	0	0	0	0	0	0	0
562	AX-147210268	Bat	B01	82.696	Araip.B01	22133745	B01_22133745_Bat	-	1	1	1	1	1	1	1	1	1	1	1	1	0	0	0	0	0	0	0	0	0	0	0	0	0	0	0	0	0	0	0	0	0	0	0	0	0	0	0	0	0
563	AX-147238256	Bat	B01	83.214	Araip.B01	24261786	B01_24261786_Bat	-	1	1	1	1	1	1	1	1	1	1	1	1	0	0	0	0	0	0	0	0	0	0	0	0	0	0	0	0	0	0	0	0	0	0	0	0	0	0	0	0	0
564	AX-147238408	Bat	B01	83.729	Araip.B01	40165748	B01_40165748_Bat	-	1	1	1	1	1	1	1	1	1	1	1	1	0	0	0	0	0	0	0	0	0	0	0	0	0	0	0	0	0	0	0	0	0	0	0	0	0	0	0	0	0
565	AX-147238632	Bat	B01	83.752	Araip.B01	89739349	B01_89739349_Bat	-	1	1	1	1	1	1	1	1	1	1	1	1	0	0	0	0	0	0	0	0	0	0	0	0	0	0	0	0	0	0	0	0	0	0	0	0	0	0	0	0	0
566	AX-147238573	Bat	B01	84.775	Araip.B01	66268396	B01_66268396_Bat	-	1	1	1	1	1	1	1	1	1	1	1	1	0	0	0	0	0	0	0	0	0	0	0	0	0	0	0	0	0	0	0	0	0	0	0	0	0	0	0	0	0
567	AX-147238498	Bat	B01	85.068	Araip.B01	50849117	B01_50849117_Bat	-	1	1	1	1	1	1	1	1	1	1	1	1	0	0	0	0	0	0	0	0	0	0	0	0	0	0	0	0	0	0	0	0	0	0	0	0	0	0	0	0	0
568	AX-147238650	Bat	B01	88.346	Araip.B01	94991606	B01_94991606_Bat	-	1	1	1	1	1	1	1	1	1	1	1	1	0	0	0	0	0	0	0	0	0	0	0	0	0	0	0	0	0	0	0	0	0	0	0	0	0	0	0	0	0
569	AX-147238665	Bat	B01	89.481	Araip.B01	99636371	B01_99636371_Bat	-	1	1	1	1	1	1	1	1	1	1	1	1	0	0	0	0	0	0	0	0	0	0	0	0	0	0	0	0	0	0	0	0	0	0	0	0	0	0	0	0	0
570	AX-147238414	Bat	B01	93.907	Araip.B01	40723567	B01_40723567_Bat	-	1	1	1	1	1	1	1	1	1	1	1	1	0	0	0	0	0	0	0	0	0	0	0	0	0	0	0	0	0	0	0	0	0	0	0	0	0	0	0	0	0
571	AX-147238361	Bat	B01	94.54	Araip.B01	34693121	B01_34693121_Bat	-	1	1	1	1	1	1	1	1	1	1	1	1	0	0	0	0	0	0	0	0	0	0	0	0	0	0	0	0	0	0	0	0	0	0	0	0	0	0	0	0	0
572	AX-147238472	Bat	B01	95.204	Araip.B01	45958898	B01_45958898_Bat	-	1	1	1	1	1	1	1	1	1	1	1	1	0	0	0	0	0	0	0	0	0	0	0	0	0	0	0	0	0	0	0	0	0	0	0	0	0	0	0	0	0
573	AX-147238594	Bat	B01	98.042	Araip.B01	72191807	B01_72191807_Bat	-	1	1	1	1	1	1	1	1	1	1	1	1	0	0	0	0	0	0	0	0	0	0	0	0	0	0	0	0	0	0	0	0	0	0	0	0	0	0	0	0	0
574	AX-147238146	Bat	B01	108.165	Araip.B01	16703027	B01_16703027_Bat	-	1	1	1	1	1	1	1	1	1	1	1	1	0	0	0	0	0	0	0	0	0	0	0	0	0	0	0	0	0	0	0	0	0	0	0	0	0	0	0	0	0
575	AX-147239221	Bat	B01	119.541	Araip.B01	129111959	B01_129111959_Bat	-	1	1	1	1	1	1	1	1	1	1	1	1	0	0	0	0	0	0	0	0	0	0	0	0	0	0	0	0	0	0	0	0	0	0	0	0	0	0	0	0	0
576	AX-147238921	Bat	B01	137.302	Araip.B01	121349467	B01_121349467_Bat	-	1	1	1	1	1	1	1	1	1	1	1	1	0	0	0	0	0	0	0	0	0	0	0	0	0	0	0	0	0	0	0	0	0	0	0	0	0	0	0	0	0
577	AX-147238901	Bat	B01	138.552	Araip.B01	120201499	B01_120201499_Bat	-	1	1	1	1	1	1	1	1	1	1	1	1	0	0	0	0	0	0	0	0	0	0	0	0	0	0	0	0	0	0	0	0	0	0	0	0	0	0	0	0	0
578	AX-147239096	Bat	B01	143.232	Araip.B01	126275217	B01_126275217_Bat	-	1	1	1	1	1	1	1	1	1	1	1	1	0	0	0	0	0	0	0	0	0	0	0	0	0	0	0	0	0	0	0	0	0	0	0	0	0	0	0	0	0
579	AX-147239160	Bat	B01	143.743	Araip.B01	127306329	B01_127306329_Bat	-	1	1	1	1	1	1	1	1	1	1	1	1	0	0	0	0	0	0	0	0	0	0	0	0	0	0	0	0	0	0	0	0	0	0	0	0	0	0	0	0	0
580	AX-147239238	Bat	B01	146.237	Araip.B01	129368257	B01_129368257_Bat	-	1	1	1	1	1	1	1	1	1	1	1	1	0	0	0	0	0	0	0	0	0	0	0	0	0	0	0	0	0	0	0	0	0	0	0	0	0	0	0	0	0
581	AX-147239234	Bat	B01	146.665	Araip.B01	129346758	B01_129346758_Bat	-	1	1	1	1	1	1	1	1	1	1	1	1	0	0	0	0	0	0	0	0	0	0	0	0	0	0	0	0	0	0	0	0	0	0	0	0	0	0	0	0	0
582	AX-147239229	Bat	B01	147.488	Araip.B01	129329429	B01_129329429_Bat	-	1	1	1	1	1	1	1	1	1	1	1	1	0	0	0	0	0	0	0	0	0	0	0	0	0	0	0	0	0	0	0	0	0	0	0	0	0	0	0	0	0
583	AX-147239255	Bat	B01	147.627	Araip.B01	129515457	B01_129515457_Bat	-	1	1	1	1	1	1	1	1	1	1	1	1	0	0	0	0	0	0	0	0	0	0	0	0	0	0	0	0	0	0	0	0	0	0	0	0	0	0	0	0	0
584	AX-147239260	Bat	B01	148.938	Araip.B01	129586363	B01_129586363_Bat	-	1	1	1	1	1	1	1	1	1	1	1	1	0	0	0	0	0	0	0	0	0	0	0	0	0	0	0	0	0	0	0	0	0	0	0	0	0	0	0	0	0
585	AX-147239259	Bat	B01	148.951	Araip.B01	129586068	B01_129586068_Bat	-	1	1	1	1	1	1	1	1	1	1	1	1	0	0	0	0	0	0	0	0	0	0	0	0	0	0	0	0	0	0	0	0	0	0	0	0	0	0	0	0	0
586	AX-147239322	Bat	B01	155.303	Araip.B01	130935077	B01_130935077_Bat	-	1	1	1	1	1	1	1	1	1	1	1	1	0	0	0	0	0	0	0	0	0	0	0	0	0	0	0	0	0	0	0	0	0	0	0	0	0	0	0	0	0
587	AX-147239364	Bat	B01	156.96	Araip.B01	131611913	B01_131611913_Bat	-	1	1	1	1	1	1	1	1	1	1	1	1	0	0	0	0	0	0	0	0	0	0	0	0	0	0	0	0	0	0	0	0	0	0	0	0	0	0	0	0	0
588	AX-147239403	Bat	B01	158.803	Araip.B01	133360557	B01_133360557_Bat	-	1	1	1	1	1	1	1	1	1	1	1	1	0	0	0	0	0	0	0	0	0	0	0	0	0	0	0	0	0	0	0	0	0	0	0	0	0	0	0	0	0
589	AX-147239438	Bat	B01	165.535	Araip.B01	134013035	B01_134013035_Bat	-	1	1	1	1	1	1	1	1	1	1	1	1	0	0	0	0	0	0	0	0	0	0	0	0	0	0	0	0	0	0	0	0	0	0	0	0	0	0	0	0	0
590	AX-147239515	Bat	B01	171.489	Araip.B01	134770291	B01_134770291_Bat	-	1	1	1	1	1	1	1	1	1	1	1	1	0	0	0	0	0	0	0	0	0	0	0	0	0	0	0	0	0	0	0	0	0	0	0	0	0	0	0	0	0
591	AX-147239577	Bat	B01	179.368	Araip.B01	135464853	B01_135464853_Bat	-	1	1	1	1	1	1	1	1	1	1	1	1	0	0	0	0	0	0	0	0	0	0	0	0	0	0	0	0	0	0	0	0	0	0	0	0	0	0	0	0	0
592	AX-147239589	Bat	B01	183.777	Araip.B01	135696566	B01_135696566_Bat	-	1	1	1	1	1	1	1	1	1	1	1	1	0	0	0	0	0	0	0	0	0	0	0	0	0	0	0	0	0	0	0	0	0	0	0	0	0	0	0	0	0
593	AX-147239595	Bat	B01	185.091	Araip.B01	135756765	B01_135756765_Bat	-	1	1	1	1	1	1	1	1	1	1	1	1	0	0	0	0	0	0	0	0	0	0	0	0	0	0	0	0	0	0	0	0	0	0	0	0	0	0	0	0	0
594	AX-147239631	Bat	B01	191.363	Araip.B01	136286145	B01_136286145_Bat	-	1	1	1	1	1	1	1	1	1	1	1	1	0	0	0	0	0	0	0	0	0	0	0	0	0	0	0	0	0	0	0	0	0	0	0	0	0	0	0	0	0
595	AX-147240274	Bat	B02	27.243	Araip.B02	2288084	B02_2288084_Bat	-	1	1	1	1	1	1	1	1	1	1	1	1	0	0	0	0	0	0	0	0	0	0	0	0	0	0	0	0	0	0	0	0	0	0	0	0	0	0	0	0	0
596	AX-147240646	Bat	B02	52.208	Araip.B02	6797838	B02_6797838_Bat	-	1	1	1	1	1	1	1	1	1	1	1	1	0	0	0	0	0	0	0	0	0	0	0	0	0	0	0	0	0	0	0	0	0	0	0	0	0	0	0	0	0
597	AX-147240734	Bat	B02	58.317	Araip.B02	8612660	B02_8612660_Bat	-	1	1	1	1	1	1	1	1	1	1	1	1	0	0	0	0	0	0	0	0	0	0	0	0	0	0	0	0	0	0	0	0	0	0	0	0	0	0	0	0	0
598	AX-147241134	Bat	B02	80.616	Araip.B02	23818799	B02_23818799_Bat	-	1	1	1	1	1	1	1	1	1	1	1	1	0	0	0	0	0	0	0	0	0	0	0	0	0	0	0	0	0	0	0	0	0	0	0	0	0	0	0	0	0
599	AX-147213489	Bat	B02	84.288	Aradu.A02•	16287488	A02•_16287488_Bat	-	1	1	1	1	1	1	1	1	1	1	1	1	0	0	0	0	0	0	0	0	0	0	0	0	0	0	0	0	0	0	0	0	0	0	0	0	0	0	0	0	0
600	AX-147240979	Bat	B02	87.292	Araip.B02	16257675	B02_16257675_Bat	-	1	1	1	1	1	1	1	1	1	1	1	1	0	0	0	0	0	0	0	0	0	0	0	0	0	0	0	0	0	0	0	0	0	0	0	0	0	0	0	0	0
601	AX-147241162	Bat	B02	94.008	Araip.B02	26043108	B02_26043108_Bat	-	1	1	1	1	1	1	1	1	1	1	1	1	0	0	0	0	0	0	0	0	0	0	0	0	0	0	0	0	0	0	0	0	0	0	0	0	0	0	0	0	0
602	AX-147241278	Bat	B02	94.62	Araip.B02	37246048	B02_37246048_Bat	-	1	1	1	1	1	1	1	1	1	1	1	1	0	0	0	0	0	0	0	0	0	0	0	0	0	0	0	0	0	0	0	0	0	0	0	0	0	0	0	0	0
603	AX-147241558	Bat	B02	99.505	Araip.B02	76871620	B02_76871620_Bat	-	1	1	1	1	1	1	1	1	1	1	1	1	0	0	0	0	0	0	0	0	0	0	0	0	0	0	0	0	0	0	0	0	0	0	0	0	0	0	0	0	0
604	AX-147241610	Bat	B02	99.514	Araip.B02	79696490	B02_79696490_Bat	-	1	1	1	1	1	1	1	1	1	1	1	1	0	0	0	0	0	0	0	0	0	0	0	0	0	0	0	0	0	0	0	0	0	0	0	0	0	0	0	0	0
605	AX-147241572	Bat	B02	99.784	Araip.B02	77666718	B02_77666718_Bat	-	1	1	1	1	1	1	1	1	1	1	1	1	0	0	0	0	0	0	0	0	0	0	0	0	0	0	0	0	0	0	0	0	0	0	0	0	0	0	0	0	0
606	AX-147241519	Bat	B02	100.312	Araip.B02	74232008	B02_74232008_Bat	-	1	1	1	1	1	1	1	1	1	1	1	1	0	0	0	0	0	0	0	0	0	0	0	0	0	0	0	0	0	0	0	0	0	0	0	0	0	0	0	0	0
607	AX-147241485	Bat	B02	104.989	Araip.B02	70551064	B02_70551064_Bat	-	1	1	1	1	1	1	1	1	1	1	1	1	0	0	0	0	0	0	0	0	0	0	0	0	0	0	0	0	0	0	0	0	0	0	0	0	0	0	0	0	0
608	AX-147241341	Bat	B02	114.811	Araip.B02	52914231	B02_52914231_Bat	-	1	1	1	1	1	1	1	1	1	1	1	1	0	0	0	0	0	0	0	0	0	0	0	0	0	0	0	0	0	0	0	0	0	0	0	0	0	0	0	0	0
609	AX-147241356	Bat	B02	115.7	Araip.B02	53978710	B02_53978710_Bat	-	1	1	1	1	1	1	1	1	1	1	1	1	0	0	0	0	0	0	0	0	0	0	0	0	0	0	0	0	0	0	0	0	0	0	0	0	0	0	0	0	0
610	AX-147241798	Bat	B02	116.102	Araip.B02	88434777	B02_88434777_Bat	-	1	1	1	1	1	1	1	1	1	1	1	1	0	0	0	0	0	0	0	0	0	0	0	0	0	0	0	0	0	0	0	0	0	0	0	0	0	0	0	0	0
611	AX-147241839	Bat	B02	119.615	Araip.B02	90229347	B02_90229347_Bat	-	1	1	1	1	1	1	1	1	1	1	1	1	0	0	0	0	0	0	0	0	0	0	0	0	0	0	0	0	0	0	0	0	0	0	0	0	0	0	0	0	0
612	AX-147241969	Bat	B02	120.652	Araip.B02	93074755	B02_93074755_Bat	-	1	1	1	1	1	1	1	1	1	1	1	1	0	0	0	0	0	0	0	0	0	0	0	0	0	0	0	0	0	0	0	0	0	0	0	0	0	0	0	0	0
613	AX-147214627	Bat	B02	123.369	Araip.B02	94944202	B02_94944202_Bat	-	1	1	1	1	1	1	1	1	1	1	1	1	0	0	0	0	0	0	0	0	0	0	0	0	0	0	0	0	0	0	0	0	0	0	0	0	0	0	0	0	0
614	AX-147242332	Bat	B02	133.95	Araip.B02	100195323	B02_100195323_Bat	-	1	1	1	1	1	1	1	1	1	1	1	1	0	0	0	0	0	0	0	0	0	0	0	0	0	0	0	0	0	0	0	0	0	0	0	0	0	0	0	0	0
615	AX-147242414	Bat	B02	140.222	Araip.B02	101401524	B02_101401524_Bat	-	1	1	1	1	1	1	1	1	1	1	1	1	0	0	0	0	0	0	0	0	0	0	0	0	0	0	0	0	0	0	0	0	0	0	0	0	0	0	0	0	0
616	AX-147242558	Bat	B02	147.559	Araip.B02	103778794	B02_103778794_Bat	-	1	1	1	1	1	1	1	1	1	1	1	1	0	0	0	0	0	0	0	0	0	0	0	0	0	0	0	0	0	0	0	0	0	0	0	0	0	0	0	0	0
617	AX-147242748	Bat	B02	156.682	Araip.B02	105769903	B02_105769903_Bat	-	1	1	1	1	1	1	1	1	1	1	1	1	0	0	0	0	0	0	0	0	0	0	0	0	0	0	0	0	0	0	0	0	0	0	0	0	0	0	0	0	0
618	AX-147242790	Bat	B02	159.561	Araip.B02	106275015	B02_106275015_Bat	-	1	1	1	1	1	1	1	1	1	1	1	1	0	0	0	0	0	0	0	0	0	0	0	0	0	0	0	0	0	0	0	0	0	0	0	0	0	0	0	0	0
619	AX-147242824	Bat	B02	166.246	Araip.B02	107417598	B02_107417598_Bat	-	1	1	1	1	1	1	1	1	1	1	1	1	0	0	0	0	0	0	0	0	0	0	0	0	0	0	0	0	0	0	0	0	0	0	0	0	0	0	0	0	0
620	AX-147242831	Bat	B02	167.501	Araip.B02	107796347	B02_107796347_Bat	-	1	1	1	1	1	1	1	1	1	1	1	1	0	0	0	0	0	0	0	0	0	0	0	0	0	0	0	0	0	0	0	0	0	0	0	0	0	0	0	0	0
621	AX-147242839	Bat	B02	169.386	Araip.B02	108109222	B02_108109222_Bat	-	1	1	1	1	1	1	1	1	1	1	1	1	0	0	0	0	0	0	0	0	0	0	0	0	0	0	0	0	0	0	0	0	0	0	0	0	0	0	0	0	0
622	AX-147242873	Bat	B02	170.851	Araip.B02	108556338	B02_108556338_Bat	-	1	1	1	1	1	1	1	1	1	1	1	1	0	0	0	0	0	0	0	0	0	0	0	0	0	0	0	0	0	0	0	0	0	0	0	0	0	0	0	0	0
623	AX-147243075	Bat	B03	0.861	Araip.B03	2440813	B03_2440813_Bat	-	1	1	1	1	1	1	1	1	1	1	1	1	0	0	0	0	0	0	0	0	0	0	0	0	0	0	0	0	0	0	0	0	0	0	0	0	0	0	0	0	0
624	AX-147243254	Bat	B03	11.343	Araip.B03	4809737	B03_4809737_Bat	-	1	1	1	1	1	1	1	1	1	1	1	1	0	0	0	0	0	0	0	0	0	0	0	0	0	0	0	0	0	0	0	0	0	0	0	0	0	0	0	0	0
625	AX-147243278	Bat	B03	15.674	Araip.B03	5066832	B03_5066832_Bat	-	1	1	1	1	1	1	1	1	1	1	1	1	0	0	0	0	0	0	0	0	0	0	0	0	0	0	0	0	0	0	0	0	0	0	0	0	0	0	0	0	0
626	AX-147243261	Bat	B03	18.538	Araip.B03	4921393	B03_4921393_Bat	-	1	1	1	1	1	1	1	1	1	1	1	1	0	0	0	0	0	0	0	0	0	0	0	0	0	0	0	0	0	0	0	0	0	0	0	0	0	0	0	0	0
627	AX-147243447	Bat	B03	29.612	Araip.B03	7616638	B03_7616638_Bat	-	1	1	1	1	1	1	1	1	1	1	1	1	0	0	0	0	0	0	0	0	0	0	0	0	0	0	0	0	0	0	0	0	0	0	0	0	0	0	0	0	0
628	AX-147243460	Bat	B03	32.06	Araip.B03	7860735	B03_7860735_Bat	-	1	1	1	1	1	1	1	1	1	1	1	1	0	0	0	0	0	0	0	0	0	0	0	0	0	0	0	0	0	0	0	0	0	0	0	0	0	0	0	0	0
629	AX-147243563	Bat	B03	41.396	Araip.B03	9999819	B03_9999819_Bat	-	1	1	1	1	1	1	1	1	1	1	1	1	0	0	0	0	0	0	0	0	0	0	0	0	0	0	0	0	0	0	0	0	0	0	0	0	0	0	0	0	0
630	AX-147255845	Bat	B03	45.778	Araip.B07	70888950	B07_70888950_Bat	-	1	1	1	1	1	1	1	1	1	1	1	1	0	0	0	0	0	0	0	0	0	0	0	0	0	0	0	0	0	0	0	0	0	0	0	0	0	0	0	0	0
631	AX-147243670	Bat	B03	48.391	Araip.B03	11855292	B03_11855292_Bat	-	1	1	1	1	1	1	1	1	1	1	1	1	0	0	0	0	0	0	0	0	0	0	0	0	0	0	0	0	0	0	0	0	0	0	0	0	0	0	0	0	0
632	AX-147243694	Bat	B03	49.167	Araip.B03	12158942	B03_12158942_Bat	-	1	1	1	1	1	1	1	1	1	1	1	1	0	0	0	0	0	0	0	0	0	0	0	0	0	0	0	0	0	0	0	0	0	0	0	0	0	0	0	0	0
633	AX-147244183	Bat	B03	69.527	Araip.B03	25572594	B03_25572594_Bat	-	1	1	1	1	1	1	1	1	1	1	1	1	0	0	0	0	0	0	0	0	0	0	0	0	0	0	0	0	0	0	0	0	0	0	0	0	0	0	0	0	0
634	AX-147244499	Bat	B03	94.867	Araip.B03	39614080	B03_39614080_Bat	-	1	1	1	1	1	1	1	1	1	1	1	1	0	0	0	0	0	0	0	0	0	0	0	0	0	0	0	0	0	0	0	0	0	0	0	0	0	0	0	0	0
635	AX-147242920	Bat	B03	117.188	Araip.B03	762928	B03_762928_Bat	-	1	1	1	1	1	1	1	1	1	1	1	1	0	0	0	0	0	0	0	0	0	0	0	0	0	0	0	0	0	0	0	0	0	0	0	0	0	0	0	0	0
636	AX-147245054	Bat	B03	128.117	Araip.B03	113447377	B03_113447377_Bat	-	1	1	1	1	1	1	1	1	1	1	1	1	0	0	0	0	0	0	0	0	0	0	0	0	0	0	0	0	0	0	0	0	0	0	0	0	0	0	0	0	0
637	AX-147245003	Bat	B03	129.586	Araip.B03	110476266	B03_110476266_Bat	-	1	1	1	1	1	1	1	1	1	1	1	1	0	0	0	0	0	0	0	0	0	0	0	0	0	0	0	0	0	0	0	0	0	0	0	0	0	0	0	0	0
638	AX-147244888	Bat	B03	130.771	Araip.B03	104424440	B03_104424440_Bat	-	1	1	1	1	1	1	1	1	1	1	1	1	0	0	0	0	0	0	0	0	0	0	0	0	0	0	0	0	0	0	0	0	0	0	0	0	0	0	0	0	0
639	AX-147244914	Bat	B03	131.1	Araip.B03	105702035	B03_105702035_Bat	-	1	1	1	1	1	1	1	1	1	1	1	1	0	0	0	0	0	0	0	0	0	0	0	0	0	0	0	0	0	0	0	0	0	0	0	0	0	0	0	0	0
640	AX-147244957	Bat	B03	132.392	Araip.B03	107990191	B03_107990191_Bat	-	1	1	1	1	1	1	1	1	1	1	1	1	0	0	0	0	0	0	0	0	0	0	0	0	0	0	0	0	0	0	0	0	0	0	0	0	0	0	0	0	0
641	AX-147244952	Bat	B03	132.758	Araip.B03	107862731	B03_107862731_Bat	-	1	1	1	1	1	1	1	1	1	1	1	1	0	0	0	0	0	0	0	0	0	0	0	0	0	0	0	0	0	0	0	0	0	0	0	0	0	0	0	0	0
642	AX-147244993	Bat	B03	133.444	Araip.B03	109910413	B03_109910413_Bat	-	1	1	1	1	1	1	1	1	1	1	1	1	0	0	0	0	0	0	0	0	0	0	0	0	0	0	0	0	0	0	0	0	0	0	0	0	0	0	0	0	0
643	AX-147245131	Bat	B03	137.972	Araip.B03	116532562	B03_116532562_Bat	-	1	1	1	1	1	1	1	1	1	1	1	1	0	0	0	0	0	0	0	0	0	0	0	0	0	0	0	0	0	0	0	0	0	0	0	0	0	0	0	0	0
644	AX-147246175	Bat	B03	140.28	Araip.B03	133535658	B03_133535658_Bat	-	1	1	1	1	1	1	1	1	1	1	1	1	0	0	0	0	0	0	0	0	0	0	0	0	0	0	0	0	0	0	0	0	0	0	0	0	0	0	0	0	0
645	AX-147246153	Bat	B03	141.78	Araip.B03	133108147	B03_133108147_Bat	-	1	1	1	1	1	1	1	1	1	1	1	1	0	0	0	0	0	0	0	0	0	0	0	0	0	0	0	0	0	0	0	0	0	0	0	0	0	0	0	0	0
646	AX-147246243	Bat	B03	143.156	Araip.B03	134565969	B03_134565969_Bat	-	1	1	1	1	1	1	1	1	1	1	1	1	0	0	0	0	0	0	0	0	0	0	0	0	0	0	0	0	0	0	0	0	0	0	0	0	0	0	0	0	0
647	AX-147245845	Bat	B03	146.742	Araip.B03	129243482	B03_129243482_Bat	-	1	1	1	1	1	1	1	1	1	1	1	1	0	0	0	0	0	0	0	0	0	0	0	0	0	0	0	0	0	0	0	0	0	0	0	0	0	0	0	0	0
648	AX-147245794	Bat	B03	147.788	Araip.B03	128561705	B03_128561705_Bat	-	1	1	1	1	1	1	1	1	1	1	1	1	0	0	0	0	0	0	0	0	0	0	0	0	0	0	0	0	0	0	0	0	0	0	0	0	0	0	0	0	0
649	AX-147245798	Bat	B03	150.655	Araip.B03	128586889	B03_128586889_Bat	-	1	1	1	1	1	1	1	1	1	1	1	1	0	0	0	0	0	0	0	0	0	0	0	0	0	0	0	0	0	0	0	0	0	0	0	0	0	0	0	0	0
650	AX-147218217	Bat	B03	151.322	Araip.B03	129421384	B03_129421384_Bat	-	1	1	1	1	1	1	1	1	1	1	1	1	0	0	0	0	0	0	0	0	0	0	0	0	1	1	1	1	1	1	1	1	1	1	1	1	0	0	0	0	0
651	AX-147245397	Bat	B03	155.057	Araip.B03	122344889	B03_122344889_Bat	-	1	1	1	1	1	1	1	1	1	1	1	1	0	0	0	0	0	0	0	0	0	0	0	0	0	0	0	0	0	0	0	0	0	0	0	0	0	0	0	0	0
652	AX-147245379	Bat	B03	155.265	Araip.B03	121854190	B03_121854190_Bat	-	1	1	1	1	1	1	1	1	1	1	1	1	0	0	0	0	0	0	0	0	0	0	0	0	0	0	0	0	0	0	0	0	0	0	0	0	0	0	0	0	0
653	AX-147245305	Bat	B03	155.933	Araip.B03	120994272	B03_120994272_Bat	-	1	1	1	1	1	1	1	1	1	1	1	1	0	0	0	0	0	0	0	0	0	0	0	0	0	0	0	0	0	0	0	0	0	0	0	0	0	0	0	0	0
654	AX-147245252	Bat	B03	156.456	Araip.B03	119952995	B03_119952995_Bat	-	1	1	1	1	1	1	1	1	1	1	1	1	0	0	0	0	0	0	0	0	0	0	0	0	0	0	0	0	0	0	0	0	0	0	0	0	0	0	0	0	0
655	AX-147245721	Bat	B03	173.165	Araip.B03	127877949	B03_127877949_Bat	-	1	1	1	1	1	1	1	1	1	1	1	1	0	0	0	0	0	0	0	0	0	0	0	0	0	0	0	0	0	0	0	0	0	0	0	0	0	0	0	0	0
656	AX-147244354	Bat	B03	202.555	Araip.B03	32004125	B03_32004125_Bat	-	1	1	1	1	1	1	1	1	1	1	1	1	0	0	0	0	0	0	0	0	0	0	0	0	0	0	0	0	0	0	0	0	0	0	0	0	0	0	0	0	0
657	AX-147244788	Bat	B03	210.298	Araip.B03	87264562	B03_87264562_Bat	-	1	1	1	1	1	1	1	1	1	1	1	1	0	0	0	0	0	0	0	0	0	0	0	0	0	0	0	0	0	0	0	0	0	0	0	0	0	0	0	0	0
658	AX-147244492	Bat	B03	216.522	Araip.B03	39072399	B03_39072399_Bat	-	1	1	1	1	1	1	1	1	1	1	1	1	0	0	0	0	0	0	0	0	0	0	0	0	0	0	0	0	0	0	0	0	0	0	0	0	0	0	0	0	0
659	AX-147244674	Bat	B03	217.345	Araip.B03	69505648	B03_69505648_Bat	-	1	1	1	1	1	1	1	1	1	1	1	1	0	0	0	0	0	0	0	0	0	0	0	0	0	0	0	0	0	0	0	0	0	0	0	0	0	0	0	0	0
660	AX-147244707	Bat	B03	218.166	Araip.B03	73582941	B03_73582941_Bat	-	1	1	1	1	1	1	1	1	1	1	1	1	0	0	0	0	0	0	0	0	0	0	0	0	0	0	0	0	0	0	0	0	0	0	0	0	0	0	0	0	0
661	AX-147246935	Bat	B04	9.849	Araip.B04	7082801	B04_7082801_Bat	-	1	1	1	1	1	1	1	1	1	1	1	1	0	0	0	0	0	0	0	0	0	0	0	0	0	0	0	0	0	0	0	0	0	0	0	0	0	0	0	0	0
662	AX-147247069	Bat	B04	21.256	Araip.B04	10528843	B04_10528843_Bat	-	1	1	1	1	1	1	1	1	1	1	1	1	0	0	0	0	0	0	0	0	0	0	0	0	0	0	0	0	0	0	0	0	0	0	0	0	0	0	0	0	0
663	AX-147247126	Bat	B04	22.839	Araip.B04	11603547	B04_11603547_Bat	-	1	1	1	1	1	1	1	1	1	1	1	1	0	0	0	0	0	0	0	0	0	0	0	0	0	0	0	0	0	0	0	0	0	0	0	0	0	0	0	0	0
664	AX-147247141	Bat	B04	25.179	Araip.B04	12863751	B04_12863751_Bat	-	1	1	1	1	1	1	1	1	1	1	1	1	0	0	0	0	0	0	0	0	0	0	0	0	0	0	0	0	0	0	0	0	0	0	0	0	0	0	0	0	0
665	AX-147247242	Bat	B04	28.908	Araip.B04	15571791	B04_15571791_Bat	-	1	1	1	1	1	1	1	1	1	1	1	1	0	0	0	0	0	0	0	0	0	0	0	0	0	0	0	0	0	0	0	0	0	0	0	0	0	0	0	0	0
666	AX-147247306	Bat	B04	36.309	Araip.B04	17705669	B04_17705669_Bat	-	1	1	1	1	1	1	1	1	1	1	1	1	0	0	0	0	0	0	0	0	0	0	0	0	0	0	0	0	0	0	0	0	0	0	0	0	0	0	0	0	0
667	AX-147247652	Bat	B04	39.939	Araip.B04	65310676	B04_65310676_Bat	-	1	1	1	1	1	1	1	1	1	1	1	1	0	0	0	0	0	0	0	0	0	0	0	0	0	0	0	0	0	0	0	0	0	0	0	0	0	0	0	0	0
668	AX-147247530	Bat	B04	40.543	Araip.B04	34380514	B04_34380514_Bat	-	1	1	1	1	1	1	1	1	1	1	1	1	0	0	0	0	0	0	0	0	0	0	0	0	0	0	0	0	0	0	0	0	0	0	0	0	0	0	0	0	0
669	AX-147247828	Bat	B04	43.675	Araip.B04	98319952	B04_98319952_Bat	-	1	1	1	1	1	1	1	1	1	1	1	1	0	0	0	0	0	0	0	0	0	0	0	0	0	0	0	0	0	0	0	0	0	0	0	0	0	0	0	0	0
670	AX-147247692	Bat	B04	45.686	Araip.B04	76642274	B04_76642274_Bat	-	1	1	1	1	1	1	1	1	1	1	1	1	0	0	0	0	0	0	0	0	0	0	0	0	0	0	0	0	0	0	0	0	0	0	0	0	0	0	0	0	0
671	AX-147247723	Bat	B04	53.042	Araip.B04	79586685	B04_79586685_Bat	-	1	1	1	1	1	1	1	1	1	1	1	1	0	0	0	0	0	0	0	0	0	0	0	0	0	0	0	0	0	0	0	0	0	0	0	0	0	0	0	0	0
672	AX-147248044	Bat	B04	66.341	Araip.B04	112529010	B04_112529010_Bat	-	1	1	1	1	1	1	1	1	1	1	1	1	0	0	0	0	0	0	0	0	0	0	0	0	0	0	0	0	0	0	0	0	0	0	0	0	0	0	0	0	0
673	AX-147248041	Bat	B04	73.812	Araip.B04	112447875	B04_112447875_Bat	-	1	1	1	1	1	1	1	1	1	1	1	1	0	0	0	0	0	0	0	0	0	0	0	0	0	0	0	0	0	0	0	0	0	0	0	0	0	0	0	0	0
674	AX-147248049	Bat	B04	76.113	Araip.B04	112676991	B04_112676991_Bat	-	1	1	1	1	1	1	1	1	1	1	1	1	0	0	0	0	0	0	0	0	0	0	0	0	0	0	0	0	0	0	0	0	0	0	0	0	0	0	0	0	0
675	AX-147248111	Bat	B04	77.18	Araip.B04	114719295	B04_114719295_Bat	-	1	1	1	1	1	1	1	1	1	1	1	1	0	0	0	0	0	0	0	0	0	0	0	0	0	0	0	0	0	0	0	0	0	0	0	0	0	0	0	0	0
676	AX-147248246	Bat	B04	82.628	Araip.B04	118035444	B04_118035444_Bat	-	1	1	1	1	1	1	1	1	1	1	1	1	0	0	0	0	0	0	0	0	0	0	0	0	0	0	0	0	0	0	0	0	0	0	0	0	0	0	0	0	0
677	AX-147220932	Bat	B04	92.193	Araip.B04	125379700	B04_125379700_Bat	-	1	1	1	1	1	1	1	1	1	1	1	1	0	0	0	0	0	0	0	0	0	0	0	0	0	0	0	0	0	0	0	0	0	0	0	0	0	0	0	0	0
678	AX-147248566	Bat	B04	94.908	Araip.B04	127389859	B04_127389859_Bat	-	1	1	1	1	1	1	1	1	1	1	1	1	0	0	0	0	0	0	0	0	0	0	0	0	0	0	0	0	0	0	0	0	0	0	0	0	0	0	0	0	0
679	AX-147248606	Bat	B04	100.103	Araip.B04	128330975	B04_128330975_Bat	-	1	1	1	1	1	1	1	1	1	1	1	1	0	0	0	0	0	0	0	0	0	0	0	0	0	0	0	0	0	0	0	0	0	0	0	0	0	0	0	0	0
680	AX-147248854	Bat	B04	112.488	Araip.B04	131462529	B04_131462529_Bat	-	1	1	1	1	1	1	1	1	1	1	1	1	0	0	0	0	0	0	0	0	0	0	0	0	0	0	0	0	0	0	0	0	0	0	0	0	0	0	0	0	0
681	AX-147221332	Bat	B04	113.803	Araip.B04	131365313	B04_131365313_Bat	-	1	1	1	1	1	1	1	1	1	1	1	1	0	0	0	0	0	0	0	0	0	0	0	0	0	0	0	0	0	0	0	0	0	0	0	0	0	0	0	0	0
682	AX-147249286	Bat	B05	5.51	Araip.B05	13136222	B05_13136222_Bat	-	1	1	1	1	1	1	1	1	1	1	1	1	0	0	0	0	0	0	0	0	0	0	0	0	0	0	0	0	0	0	0	0	0	0	0	0	0	0	0	0	0
683	AX-147249313	Bat	B05	7.719	Araip.B05	14565015	B05_14565015_Bat	-	1	1	1	1	1	1	1	1	1	1	1	1	0	0	0	0	0	0	0	0	0	0	0	0	0	0	0	0	0	0	0	0	0	0	0	0	0	0	0	0	0
684	AX-147249334	Bat	B05	8.289	Araip.B05	15044886	B05_15044886_Bat	-	1	1	1	1	1	1	1	1	1	1	1	1	0	0	0	0	0	0	0	0	0	0	0	0	0	0	0	0	0	0	0	0	0	0	0	0	0	0	0	0	0
685	AX-147249353	Bat	B05	9.735	Araip.B05	15251148	B05_15251148_Bat	-	1	1	1	1	1	1	1	1	1	1	1	1	0	0	0	0	0	0	0	0	0	0	0	0	0	0	0	0	0	0	0	0	0	0	0	0	0	0	0	0	0
686	AX-147249407	Bat	B05	11.255	Araip.B05	16541904	B05_16541904_Bat	-	1	1	1	1	1	1	1	1	1	1	1	1	0	0	0	0	0	0	0	0	0	0	0	0	0	0	0	0	0	0	0	0	0	0	0	0	0	0	0	0	0
687	AX-147249470	Bat	B05	12.827	Araip.B05	17973620	B05_17973620_Bat	-	1	1	1	1	1	1	1	1	1	1	1	1	0	0	0	0	0	0	0	0	0	0	0	0	0	0	0	0	0	0	0	0	0	0	0	0	0	0	0	0	0
688	AX-147249464	Bat	B05	17.757	Araip.B05	17909630	B05_17909630_Bat	-	1	1	1	1	1	1	1	1	1	1	1	1	0	0	0	0	0	0	0	0	0	0	0	0	0	0	0	0	0	0	0	0	0	0	0	0	0	0	0	0	0
689	AX-147249773	Bat	B05	24.767	Araip.B05	29566484	B05_29566484_Bat	-	1	1	1	1	1	1	1	1	1	1	1	1	0	0	0	0	0	0	0	0	0	0	0	0	0	0	0	0	0	0	0	0	0	0	0	0	0	0	0	0	0
690	AX-147249835	Bat	B05	26.239	Araip.B05	33182321	B05_33182321_Bat	-	1	1	1	1	1	1	1	1	1	1	1	1	0	0	0	0	0	0	0	0	0	0	0	0	0	0	0	0	0	0	0	0	0	0	0	0	0	0	0	0	0
691	AX-147249883	Bat	B05	28.156	Araip.B05	43385041	B05_43385041_Bat	-	1	1	1	1	1	1	1	1	1	1	1	1	0	0	0	0	0	0	0	0	0	0	0	0	0	0	0	0	0	0	0	0	0	0	0	0	0	0	0	0	0
692	AX-147249942	Bat	B05	30.631	Araip.B05	57773989	B05_57773989_Bat	-	1	1	1	1	1	1	1	1	1	1	1	1	0	0	0	0	0	0	0	0	0	0	0	0	0	0	0	0	0	0	0	0	0	0	0	0	0	0	0	0	0
693	AX-147250057	Bat	B05	32.865	Araip.B05	106441239	B05_106441239_Bat	-	1	1	1	1	1	1	1	1	1	1	1	1	0	0	0	0	0	0	0	0	0	0	0	0	0	0	0	0	0	0	0	0	0	0	0	0	0	0	0	0	0
694	AX-147250073	Bat	B05	34.586	Araip.B05	107759702	B05_107759702_Bat	-	1	1	1	1	1	1	1	1	1	1	1	1	0	0	0	0	0	0	0	0	0	0	0	0	0	0	0	0	0	0	0	0	0	0	0	0	0	0	0	0	0
695	AX-147250202	Bat	B05	36.894	Araip.B05	117310886	B05_117310886_Bat	-	1	1	1	1	1	1	1	1	1	1	1	1	0	0	0	0	0	0	0	0	0	0	0	0	0	0	0	0	0	0	0	0	0	0	0	0	0	0	0	0	0
696	AX-147250331	Bat	B05	37.733	Araip.B05	123573318	B05_123573318_Bat	-	1	1	1	1	1	1	1	1	1	1	1	1	0	0	0	0	0	0	0	0	0	0	0	0	0	0	0	0	0	0	0	0	0	0	0	0	0	0	0	0	0
697	AX-147250253	Bat	B05	39.745	Araip.B05	120292915	B05_120292915_Bat	-	1	1	1	1	1	1	1	1	1	1	1	1	0	0	0	0	0	0	0	0	0	0	0	0	0	0	0	0	0	0	0	0	0	0	0	0	0	0	0	0	0
698	AX-147250350	Bat	B05	42.703	Araip.B05	124713719	B05_124713719_Bat	-	1	1	1	1	1	1	1	1	1	1	1	1	0	0	0	0	0	0	0	0	0	0	0	0	0	0	0	0	0	0	0	0	0	0	0	0	0	0	0	0	0
699	AX-147250541	Bat	B05	54.253	Araip.B05	132586908	B05_132586908_Bat	-	1	1	1	1	1	1	1	1	1	1	1	1	0	0	0	0	0	0	0	0	0	0	0	0	0	0	0	0	0	0	0	0	0	0	0	0	0	0	0	0	0
700	AX-147250693	Bat	B05	68.57	Araip.B05	137526639	B05_137526639_Bat	-	1	1	1	1	1	1	1	1	1	1	1	1	0	0	0	0	0	0	0	0	0	0	0	0	0	0	0	0	0	0	0	0	0	0	0	0	0	0	0	0	0
701	AX-147250688	Bat	B05	72.269	Araip.B05	137461583	B05_137461583_Bat	-	1	1	1	1	1	1	1	1	1	1	1	1	0	0	0	0	0	0	0	0	0	0	0	0	0	0	0	0	0	0	0	0	0	0	0	0	0	0	0	0	0
702	AX-147250751	Bat	B05	77.396	Araip.B05	138918340	B05_138918340_Bat	-	1	1	1	1	1	1	1	1	1	1	1	1	0	0	0	0	0	0	0	0	0	0	0	0	0	0	0	0	0	0	0	0	0	0	0	0	0	0	0	0	0
703	AX-147250846	Bat	B05	80.952	Araip.B05	141248763	B05_141248763_Bat	-	1	1	1	1	1	1	1	1	1	1	1	1	0	0	0	0	0	0	0	0	0	0	0	0	0	0	0	0	0	0	0	0	0	0	0	0	0	0	0	0	0
704	AX-147250948	Bat	B05	84.696	Araip.B05	142726106	B05_142726106_Bat	-	1	1	1	1	1	1	1	1	1	1	1	1	0	0	0	0	0	0	0	0	0	0	0	0	0	0	0	0	0	0	0	0	0	0	0	0	0	0	0	0	0
705	AX-147250873	Bat	B05	95.844	Araip.B05	141584110	B05_141584110_Bat	-	1	1	1	1	1	1	1	1	1	1	1	1	0	0	0	0	0	0	0	0	0	0	0	0	0	0	0	0	0	0	0	0	0	0	0	0	0	0	0	0	0
706	AX-147250971	Bat	B05	107.217	Araip.B05	143107610	B05_143107610_Bat	-	1	1	1	1	1	1	1	1	1	1	1	1	0	0	0	0	0	0	0	0	0	0	0	0	0	0	0	0	0	0	0	0	0	0	0	0	0	0	0	0	0
707	AX-147251018	Bat	B05	108.746	Araip.B05	143642749	B05_143642749_Bat	-	1	1	1	1	1	1	1	1	1	1	1	1	0	0	0	0	0	0	0	0	0	0	0	0	0	0	0	0	0	0	0	0	0	0	0	0	0	0	0	0	0
708	AX-147251039	Bat	B05	109.704	Araip.B05	143744093	B05_143744093_Bat	-	1	1	1	1	1	1	1	1	1	1	1	1	0	0	0	0	0	0	0	0	0	0	0	0	0	0	0	0	0	0	0	0	0	0	0	0	0	0	0	0	0
709	AX-147251155	Bat	B05	111.737	Araip.B05	145480213	B05_145480213_Bat	-	1	1	1	1	1	1	1	1	1	1	1	1	0	0	0	0	0	0	0	0	0	0	0	0	0	0	0	0	0	0	0	0	0	0	0	0	0	0	0	0	0
710	AX-147251131	Bat	B05	112.267	Araip.B05	145315471	B05_145315471_Bat	-	1	1	1	1	1	1	1	1	1	1	1	1	0	0	0	0	0	0	0	0	0	0	0	0	0	0	0	0	0	0	0	0	0	0	0	0	0	0	0	0	0
711	AX-147251678	Bat	B06	0	Araip.B06	2108147	B06_2108147_Bat	-	1	1	1	1	1	1	1	1	1	1	1	1	0	0	0	0	0	0	0	0	0	0	0	0	0	0	0	0	0	0	0	0	0	0	0	0	0	0	0	0	0
712	AX-147251730	Bat	B06	1.703	Araip.B06	2915383	B06_2915383_Bat	-	1	1	1	1	1	1	1	1	1	1	1	1	0	0	0	0	0	0	0	0	0	0	0	0	0	0	0	0	0	0	0	0	0	0	0	0	0	0	0	0	0
713	AX-147251735	Bat	B06	2.521	Araip.B06	2919924	B06_2919924_Bat	-	1	1	1	1	1	1	1	1	1	1	1	1	0	0	0	0	0	0	0	0	0	0	0	0	0	0	0	0	0	0	0	0	0	0	0	0	0	0	0	0	0
714	AX-147251821	Bat	B06	5.698	Araip.B06	4119125	B06_4119125_Bat	-	1	1	1	1	1	1	1	1	1	1	1	1	0	0	0	0	0	0	0	0	0	0	0	0	0	0	0	0	0	0	0	0	0	0	0	0	0	0	0	0	0
715	AX-147251889	Bat	B06	7.358	Araip.B06	4893923	B06_4893923_Bat	-	1	1	1	1	1	1	1	1	1	1	1	1	0	0	0	0	0	0	0	0	0	0	0	0	0	0	0	0	0	0	0	0	0	0	0	0	0	0	0	0	0
716	AX-147251933	Bat	B06	8.654	Araip.B06	5330839	B06_5330839_Bat	-	1	1	1	1	1	1	1	1	1	1	1	1	0	0	0	0	0	0	0	0	0	0	0	0	0	0	0	0	0	0	0	0	0	0	0	0	0	0	0	0	0
717	AX-147251964	Bat	B06	11.121	Araip.B06	5774061	B06_5774061_Bat	-	1	1	1	1	1	1	1	1	1	1	1	1	0	0	0	0	0	0	0	0	0	0	0	0	0	0	0	0	0	0	0	0	0	0	0	0	0	0	0	0	0
718	AX-147251981	Bat	B06	13.38	Araip.B06	6067801	B06_6067801_Bat	-	1	1	1	1	1	1	1	1	1	1	1	1	0	0	0	0	0	0	0	0	0	0	0	0	0	0	0	0	0	0	0	0	0	0	0	0	0	0	0	0	0
719	AX-147252036	Bat	B06	17.717	Araip.B06	7482970	B06_7482970_Bat	-	1	1	1	1	1	1	1	1	1	1	1	1	0	0	0	0	0	0	0	0	0	0	0	0	0	0	0	0	0	0	0	0	0	0	0	0	0	0	0	0	0
720	AX-147252072	Bat	B06	20.277	Araip.B06	8516083	B06_8516083_Bat	-	1	1	1	1	1	1	1	1	1	1	1	1	0	0	0	0	0	0	0	0	0	0	0	0	0	0	0	0	0	0	0	0	0	0	0	0	0	0	0	0	0
721	AX-147252136	Bat	B06	21.826	Araip.B06	10237204	B06_10237204_Bat	-	1	1	1	1	1	1	1	1	1	1	1	1	0	0	0	0	0	0	0	0	0	0	0	0	0	0	0	0	0	0	0	0	0	0	0	0	0	0	0	0	0
722	AX-147252233	Bat	B06	27.942	Araip.B06	12341058	B06_12341058_Bat	-	1	1	1	1	1	1	1	1	1	1	1	1	0	0	0	0	0	0	0	0	0	0	0	0	0	0	0	0	0	0	0	0	0	0	0	0	0	0	0	0	0
723	AX-147252315	Bat	B06	38.155	Araip.B06	14178060	B06_14178060_Bat	-	1	1	1	1	1	1	1	1	1	1	1	1	0	0	0	0	0	0	0	0	0	0	0	0	0	0	0	0	0	0	0	0	0	0	0	0	0	0	0	0	0
724	AX-147252365	Bat	B06	40.126	Araip.B06	14920883	B06_14920883_Bat	-	1	1	1	1	1	1	1	1	1	1	1	1	0	0	0	0	0	0	0	0	0	0	0	0	0	0	0	0	0	0	0	0	0	0	0	0	0	0	0	0	0
725	AX-147252377	Bat	B06	41.29	Araip.B06	15389258	B06_15389258_Bat	-	1	1	1	1	1	1	1	1	1	1	1	1	0	0	0	0	0	0	0	0	0	0	0	0	0	0	0	0	0	0	0	0	0	0	0	0	0	0	0	0	0
726	AX-147252357	Bat	B06	42.554	Araip.B06	14689445	B06_14689445_Bat	-	1	1	1	1	1	1	1	1	1	1	1	1	0	0	0	0	0	0	0	0	0	0	0	0	0	0	0	0	0	0	0	0	0	0	0	0	0	0	0	0	0
727	AX-147252499	Bat	B06	47.52	Araip.B06	19526959	B06_19526959_Bat	-	1	1	1	1	1	1	1	1	1	1	1	1	0	0	0	0	0	0	0	0	0	0	0	0	0	0	0	0	0	0	0	0	0	0	0	0	0	0	0	0	0
728	AX-147252603	Bat	B06	49.163	Araip.B06	23447599	B06_23447599_Bat	-	1	1	1	1	1	1	1	1	1	1	1	1	0	0	0	0	0	0	0	0	0	0	0	0	0	0	0	0	0	0	0	0	0	0	0	0	0	0	0	0	0
729	AX-147252564	Bat	B06	49.533	Araip.B06	21746656	B06_21746656_Bat	-	1	1	1	1	1	1	1	1	1	1	1	1	0	0	0	0	0	0	0	0	0	0	0	0	0	0	0	0	0	0	0	0	0	0	0	0	0	0	0	0	0
730	AX-147252522	Bat	B06	50.796	Araip.B06	20680642	B06_20680642_Bat	-	1	1	1	1	1	1	1	1	1	1	1	1	0	0	0	0	0	0	0	0	0	0	0	0	0	0	0	0	0	0	0	0	0	0	0	0	0	0	0	0	0
731	AX-147252835	Bat	B06	55.013	Araip.B06	43944501	B06_43944501_Bat	-	1	1	1	1	1	1	1	1	1	1	1	1	0	0	0	0	0	0	0	0	0	0	0	0	0	0	0	0	0	0	0	0	0	0	0	0	0	0	0	0	0
732	AX-147252888	Bat	B06	56.019	Araip.B06	64142185	B06_64142185_Bat	-	1	1	1	1	1	1	1	1	1	1	1	1	0	0	0	0	0	0	0	0	0	0	0	0	0	0	0	0	0	0	0	0	0	0	0	0	0	0	0	0	0
733	AX-147252964	Bat	B06	64.471	Araip.B06	88491980	B06_88491980_Bat	-	1	1	1	1	1	1	1	1	1	1	1	1	0	0	0	0	0	0	0	0	0	0	0	0	0	0	0	0	0	0	0	0	0	0	0	0	0	0	0	0	0
734	AX-147252777	Bat	B06	65.176	Araip.B06	34780735	B06_34780735_Bat	-	1	1	1	1	1	1	1	1	1	1	1	1	0	0	0	0	0	0	0	0	0	0	0	0	0	0	0	0	0	0	0	0	0	0	0	0	0	0	0	0	0
735	AX-147252686	Bat	B06	68.602	Araip.B06	27994454	B06_27994454_Bat	-	1	1	1	1	1	1	1	1	1	1	1	1	0	0	0	0	0	0	0	0	0	0	0	0	0	0	0	0	0	0	0	0	0	0	0	0	0	0	0	0	0
736	AX-147253000	Bat	B06	72.388	Araip.B06	97783076	B06_97783076_Bat	-	1	1	1	1	1	1	1	1	1	1	1	1	0	0	0	0	0	0	0	0	0	0	0	0	0	0	0	0	0	0	0	0	0	0	0	0	0	0	0	0	0
737	AX-147253055	Bat	B06	74.808	Araip.B06	102088989	B06_102088989_Bat	-	1	1	1	1	1	1	1	1	1	1	1	1	0	0	0	0	0	0	0	0	0	0	0	0	0	0	0	0	0	0	0	0	0	0	0	0	0	0	0	0	0
738	AX-147253456	Bat	B06	97.175	Araip.B06	121814302	B06_121814302_Bat	-	1	1	1	1	1	1	1	1	1	1	1	1	0	0	0	0	0	0	0	0	0	0	0	0	0	0	0	0	0	0	0	0	0	0	0	0	0	0	0	0	0
739	AX-147253469	Bat	B06	99.208	Araip.B06	122337830	B06_122337830_Bat	-	1	1	1	1	1	1	1	1	1	1	1	1	0	0	0	0	0	0	0	0	0	0	0	0	0	0	0	0	0	0	0	0	0	0	0	0	0	0	0	0	0
740	AX-147253667	Bat	B06	104.943	Araip.B06	126838179	B06_126838179_Bat	-	1	1	1	1	1	1	1	1	1	1	1	1	0	0	0	0	0	0	0	0	0	0	0	0	0	0	0	0	0	0	0	0	0	0	0	0	0	0	0	0	0
741	AX-147253514	Bat	B06	110.895	Araip.B06	123529801	B06_123529801_Bat	-	1	1	1	1	1	1	1	1	1	1	1	1	0	0	0	0	0	0	0	0	0	0	0	0	0	0	0	0	0	0	0	0	0	0	0	0	0	0	0	0	0
742	AX-147253637	Bat	B06	111.71	Araip.B06	126063888	B06_126063888_Bat	-	1	1	1	1	1	1	1	1	1	1	1	1	0	0	0	0	0	0	0	0	0	0	0	0	0	0	0	0	0	0	0	0	0	0	0	0	0	0	0	0	0
743	AX-147253756	Bat	B06	114.979	Araip.B06	128403562	B06_128403562_Bat	-	1	1	1	1	1	1	1	1	1	1	1	1	0	0	0	0	0	0	0	0	0	0	0	0	0	0	0	0	0	0	0	0	0	0	0	0	0	0	0	0	0
744	AX-147253742	Bat	B06	115.562	Araip.B06	128290662	B06_128290662_Bat	-	1	1	1	1	1	1	1	1	1	1	1	1	0	0	0	0	0	0	0	0	0	0	0	0	0	0	0	0	0	0	0	0	0	0	0	0	0	0	0	0	0
745	AX-147253822	Bat	B06	120.138	Araip.B06	129411090	B06_129411090_Bat	-	1	1	1	1	1	1	1	1	1	1	1	1	0	0	0	0	0	0	0	0	0	0	0	0	0	0	0	0	0	0	0	0	0	0	0	0	0	0	0	0	0
746	AX-147253856	Bat	B06	129.83	Araip.B06	130108581	B06_130108581_Bat	-	1	1	1	1	1	1	1	1	1	1	1	1	0	0	0	0	0	0	0	0	0	0	0	0	0	0	0	0	0	0	0	0	0	0	0	0	0	0	0	0	0
747	AX-147254043	Bat	B06	138.475	Araip.B06	133341872	B06_133341872_Bat	-	1	1	1	1	1	1	1	1	1	1	1	1	0	0	0	0	0	0	0	0	0	0	0	0	0	0	0	0	0	0	0	0	0	0	0	0	0	0	0	0	0
748	AX-147254084	Bat	B06	147.341	Araip.B06	133625056	B06_133625056_Bat	-	1	1	1	1	1	1	1	1	1	1	1	1	0	0	0	0	0	0	0	0	0	0	0	0	0	0	0	0	0	0	0	0	0	0	0	0	0	0	0	0	0
749	AX-147254153	Bat	B06	160.422	Araip.B06	134198142	B06_134198142_Bat	-	1	1	1	1	1	1	1	1	1	1	1	1	0	0	0	0	0	0	0	0	0	0	0	0	0	0	0	0	0	0	0	0	0	0	0	0	0	0	0	0	0
750	AX-147254226	Bat	B06	168.689	Araip.B06	135631919	B06_135631919_Bat	-	1	1	1	1	1	1	1	1	1	1	1	1	0	0	0	0	0	0	0	0	0	0	0	0	0	0	0	0	0	0	0	0	0	0	0	0	0	0	0	0	0
751	AX-147226758	Bat	B06	169.987	Araip.B06	135788589	B06_135788589_Bat	-	1	1	1	1	1	1	1	1	1	1	1	1	0	0	0	0	0	0	0	0	0	0	0	0	0	0	0	0	0	0	0	0	0	0	0	0	0	0	0	0	0
752	AX-147254273	Bat	B07	7.782	Araip.B06	136738322	B06_136738322_Bat	-	1	1	1	1	1	1	1	1	1	1	1	1	0	0	0	0	0	0	0	0	0	0	0	0	0	0	0	0	0	0	0	0	0	0	0	0	0	0	0	0	0
753	AX-147254526	Bat	B07	18.151	Araip.B07	2693761	B07_2693761_Bat	-	1	1	1	1	1	1	1	1	1	1	1	1	0	0	0	0	0	0	0	0	0	0	0	0	0	0	0	0	0	0	0	0	0	0	0	0	0	0	0	0	0
754	AX-147254456	Bat	B07	20.5	Araip.B07	1941111	B07_1941111_Bat	-	1	1	1	1	1	1	1	1	1	1	1	1	0	0	0	0	0	0	0	0	0	0	0	0	0	0	0	0	0	0	0	0	0	0	0	0	0	0	0	0	0
755	AX-147254462	Bat	B07	20.901	Araip.B07	1948113	B07_1948113_Bat	-	1	1	1	1	1	1	1	1	1	1	1	1	0	0	0	0	0	0	0	0	0	0	0	0	0	0	0	0	0	0	0	0	0	0	0	0	0	0	0	0	0
756	AX-147254466	Bat	B07	22.338	Araip.B07	1977695	B07_1977695_Bat	-	1	1	1	1	1	1	1	1	1	1	1	1	0	0	0	0	0	0	0	0	0	0	0	0	0	0	0	0	0	0	0	0	0	0	0	0	0	0	0	0	0
757	AX-147254599	Bat	B07	27.916	Araip.B07	3510743	B07_3510743_Bat	-	1	1	1	1	1	1	1	1	1	1	1	1	0	0	0	0	0	0	0	0	0	0	0	0	0	0	0	0	0	0	0	0	0	0	0	0	0	0	0	0	0
758	AX-147254688	Bat	B07	31.904	Araip.B07	4382301	B07_4382301_Bat	-	1	1	1	1	1	1	1	1	1	1	1	1	0	0	0	0	0	0	0	0	0	0	0	0	0	0	0	0	0	0	0	0	0	0	0	0	0	0	0	0	0
759	AX-147254784	Bat	B07	38.642	Araip.B07	5743938	B07_5743938_Bat	-	1	1	1	1	1	1	1	1	1	1	1	1	0	0	0	0	0	0	0	0	0	0	0	0	0	0	0	0	0	0	0	0	0	0	0	0	0	0	0	0	0
760	AX-147254869	Bat	B07	47.188	Araip.B07	7446821	B07_7446821_Bat	-	1	1	1	1	1	1	1	1	1	1	1	1	0	0	0	0	0	0	0	0	0	0	0	0	0	0	0	0	0	0	0	0	0	0	0	0	0	0	0	0	0
761	AX-147254885	Bat	B07	47.733	Araip.B07	8461159	B07_8461159_Bat	-	1	1	1	1	1	1	1	1	1	1	1	1	0	0	0	0	0	0	0	0	0	0	0	0	0	0	0	0	0	0	0	0	0	0	0	0	0	0	0	0	0
762	AX-147255004	Bat	B07	54.365	Araip.B07	11218651	B07_11218651_Bat	-	1	1	1	1	1	1	1	1	1	1	1	1	0	0	0	0	0	0	0	0	0	0	0	0	0	0	0	0	0	0	0	0	0	0	0	0	0	0	0	0	0
763	AX-147255063	Bat	B07	56.9	Araip.B07	12937358	B07_12937358_Bat	-	1	1	1	1	1	1	1	1	1	1	1	1	0	0	0	0	0	0	0	0	0	0	0	0	0	0	0	0	0	0	0	0	0	0	0	0	0	0	0	0	0
764	AX-147255096	Bat	B07	58.193	Araip.B07	13913316	B07_13913316_Bat	-	1	1	1	1	1	1	1	1	1	1	1	1	0	0	0	0	0	0	0	0	0	0	0	0	0	0	0	0	0	0	0	0	0	0	0	0	0	0	0	0	0
765	AX-147255743	Bat	B07	60.837	Araip.B07	54435336	B07_54435336_Bat	-	1	1	1	1	1	1	1	1	1	1	1	1	0	0	0	0	0	0	0	0	0	0	0	0	0	0	0	0	0	0	0	0	0	0	0	0	0	0	0	0	0
766	AX-147255415	Bat	B07	68.701	Araip.B07	27260116	B07_27260116_Bat	-	1	1	1	1	1	1	1	1	1	1	1	1	0	0	0	0	0	0	0	0	0	0	0	0	0	0	0	0	0	0	0	0	0	0	0	0	0	0	0	0	0
767	AX-147228735	Bat	B07	70.72	Araip.B07	32191781	B07_32191781_Bat	-	1	1	1	1	1	1	1	1	1	1	1	1	0	0	0	0	0	0	0	0	0	0	0	0	0	0	0	0	0	0	0	0	0	0	0	0	0	0	0	0	0
768	AX-147255578	Bat	B07	72.416	Araip.B07	35118089	B07_35118089_Bat	-	1	1	1	1	1	1	1	1	1	1	1	1	0	0	0	0	0	0	0	0	0	0	0	0	0	0	0	0	0	0	0	0	0	0	0	0	0	0	0	0	0
769	AX-147255592	Bat	B07	72.779	Araip.B07	36138425	B07_36138425_Bat	-	1	1	1	1	1	1	1	1	1	1	1	1	0	0	0	0	0	0	0	0	0	0	0	0	0	0	0	0	0	0	0	0	0	0	0	0	0	0	0	0	0
770	AX-147255716	Bat	B07	80.119	Araip.B07	51073486	B07_51073486_Bat	-	1	1	1	1	1	1	1	1	1	1	1	1	0	0	0	0	0	0	0	0	0	0	0	0	0	0	0	0	0	0	0	0	0	0	0	0	0	0	0	0	0
771	AX-147255687	Bat	B07	80.124	Araip.B07	47528888	B07_47528888_Bat	-	1	1	1	1	1	1	1	1	1	1	1	1	0	0	0	0	0	0	0	0	0	0	0	0	0	0	0	0	0	0	0	0	0	0	0	0	0	0	0	0	0
772	AX-147255885	Bat	B07	80.89	Araip.B07	86904970	B07_86904970_Bat	-	1	1	1	1	1	1	1	1	1	1	1	1	0	0	0	0	0	0	0	0	0	0	0	0	0	0	0	0	0	0	0	0	0	0	0	0	0	0	0	0	0
773	AX-147256038	Bat	B07	82.4	Araip.B07	103170829	B07_103170829_Bat	-	1	1	1	1	1	1	1	1	1	1	1	1	0	0	0	0	0	0	0	0	0	0	0	0	0	0	0	0	0	0	0	0	0	0	0	0	0	0	0	0	0
774	AX-147256010	Bat	B07	82.7	Araip.B07	102296689	B07_102296689_Bat	-	1	1	1	1	1	1	1	1	1	1	1	1	0	0	0	0	0	0	0	0	0	0	0	0	0	0	0	0	0	0	0	0	0	0	0	0	0	0	0	0	0
775	AX-147256002	Bat	B07	83.986	Araip.B07	102227971	B07_102227971_Bat	-	1	1	1	1	1	1	1	1	1	1	1	1	0	0	0	0	0	0	0	0	0	0	0	0	0	0	0	0	0	0	0	0	0	0	0	0	0	0	0	0	0
776	AX-147256076	Bat	B07	85.748	Araip.B07	105566627	B07_105566627_Bat	-	1	1	1	1	1	1	1	1	1	1	1	1	0	0	0	0	0	0	0	0	0	0	0	0	0	0	0	0	0	0	0	0	0	0	0	0	0	0	0	0	0
777	AX-147256086	Bat	B07	86.315	Araip.B07	105778119	B07_105778119_Bat	-	1	1	1	1	1	1	1	1	1	1	1	1	0	0	0	0	0	0	0	0	0	0	0	0	0	0	0	0	0	0	0	0	0	0	0	0	0	0	0	0	0
778	AX-147256083	Bat	B07	86.319	Araip.B07	105747743	B07_105747743_Bat	-	1	1	1	1	1	1	1	1	1	1	1	1	0	0	0	0	0	0	0	0	0	0	0	0	0	0	0	0	0	0	0	0	0	0	0	0	0	0	0	0	0
779	AX-147256150	Bat	B07	88.532	Araip.B07	108723784	B07_108723784_Bat	-	1	1	1	1	1	1	1	1	1	1	1	1	0	0	0	0	0	0	0	0	0	0	0	0	0	0	0	0	0	0	0	0	0	0	0	0	0	0	0	0	0
780	AX-147256197	Bat	B07	91.324	Araip.B07	111420088	B07_111420088_Bat	-	1	1	1	1	1	1	1	1	1	1	1	1	0	0	0	0	0	0	0	0	0	0	0	0	0	0	0	0	0	0	0	0	0	0	0	0	0	0	0	0	0
781	AX-147256313	Bat	B07	95.492	Araip.B07	113526914	B07_113526914_Bat	-	1	1	1	1	1	1	1	1	1	1	1	1	0	0	0	0	0	0	0	0	0	0	0	0	0	0	0	0	0	0	0	0	0	0	0	0	0	0	0	0	0
782	AX-147256306	Bat	B07	96.528	Araip.B07	113384646	B07_113384646_Bat	-	1	1	1	1	1	1	1	1	1	1	1	1	0	0	0	0	0	0	0	0	0	0	0	0	0	0	0	0	0	0	0	0	0	0	0	0	0	0	0	0	0
783	AX-147256349	Bat	B07	97.928	Araip.B07	114537681	B07_114537681_Bat	-	1	1	1	1	1	1	1	1	1	1	1	1	0	0	0	0	0	0	0	0	0	0	0	0	0	0	0	0	0	0	0	0	0	0	0	0	0	0	0	0	0
784	AX-147256539	Bat	B07	107.996	Araip.B07	119933219	B07_119933219_Bat	-	1	1	1	1	1	1	1	1	1	1	1	1	0	0	0	0	0	0	0	0	0	0	0	0	0	0	0	0	0	0	0	0	0	0	0	0	0	0	0	0	0
785	AX-147256567	Bat	B07	109.917	Araip.B07	120477607	B07_120477607_Bat	-	1	1	1	1	1	1	1	1	1	1	1	1	0	0	0	0	0	0	0	0	0	0	0	0	0	0	0	0	0	0	0	0	0	0	0	0	0	0	0	0	0
786	AX-147256596	Bat	B07	114.838	Araip.B07	121040436	B07_121040436_Bat	-	1	1	1	1	1	1	1	1	1	1	1	1	0	0	0	0	0	0	0	0	0	0	0	0	0	0	0	0	0	0	0	0	0	0	0	0	0	0	0	0	0
787	AX-147256623	Bat	B07	116.689	Araip.B07	121762693	B07_121762693_Bat	-	1	1	1	1	1	1	1	1	1	1	1	1	0	0	0	0	0	0	0	0	0	0	0	0	0	0	0	0	0	0	0	0	0	0	0	0	0	0	0	0	0
788	AX-147256650	Bat	B07	120.8	Araip.B07	122219815	B07_122219815_Bat	-	1	1	1	1	1	1	1	1	1	1	1	1	0	0	0	0	0	0	0	0	0	0	0	0	0	0	0	0	0	0	0	0	0	0	0	0	0	0	0	0	0
789	AX-147256836	Bat	B07	139.033	Araip.B07	124845218	B07_124845218_Bat	-	1	1	1	1	1	1	1	1	1	1	1	1	0	0	0	0	0	0	0	0	0	0	0	0	0	0	0	0	0	0	0	0	0	0	0	0	0	0	0	0	0
790	AX-147259610	Bat	B08	0	Araip.B09	444888	B09_444888_Bat	-	1	1	1	1	1	1	1	1	1	1	1	1	0	0	0	0	0	0	0	0	0	0	0	0	0	0	0	0	0	0	0	0	0	0	0	0	0	0	0	0	0
791	AX-147228780	Bat	B08	0.822	Araip.B09	370671	B09_370671_Bat	-	1	1	1	1	1	1	1	1	1	1	1	1	0	0	0	0	0	0	0	0	0	0	0	0	0	0	0	0	0	0	0	0	0	0	0	0	0	0	0	0	0
792	AX-147256927	Bat	B08	3.75	Araip.B08	246882	B08_246882_Bat	-	1	1	1	1	1	1	1	1	1	1	1	1	0	0	0	0	0	0	0	0	0	0	0	0	0	0	0	0	0	0	0	0	0	0	0	0	0	0	0	0	0
793	AX-147256989	Bat	B08	10.337	Araip.B08	979074	B08_979074_Bat	-	1	1	1	1	1	1	1	1	1	1	1	1	0	0	0	0	0	0	0	0	0	0	0	0	0	0	0	0	0	0	0	0	0	0	0	0	0	0	0	0	0
794	AX-147257026	Bat	B08	12.775	Araip.B08	1153337	B08_1153337_Bat	-	1	1	1	1	1	1	1	1	1	1	1	1	0	0	0	0	0	0	0	0	0	0	0	0	0	0	0	0	0	0	0	0	0	0	0	0	0	0	0	0	0
795	AX-147257036	Bat	B08	13.305	Araip.B08	1208921	B08_1208921_Bat	-	1	1	1	1	1	1	1	1	1	1	1	1	0	0	0	0	0	0	0	0	0	0	0	0	0	0	0	0	0	0	0	0	0	0	0	0	0	0	0	0	0
796	AX-147257214	Bat	B08	31.798	Araip.B08	2856677	B08_2856677_Bat	-	1	1	1	1	1	1	1	1	1	1	1	1	0	0	0	0	0	0	0	0	0	0	0	0	0	0	0	0	0	0	0	0	0	0	0	0	0	0	0	0	0
797	AX-147257243	Bat	B08	33.483	Araip.B08	3136502	B08_3136502_Bat	-	1	1	1	1	1	1	1	1	1	1	1	1	0	0	0	0	0	0	0	0	0	0	0	0	0	0	0	0	0	0	0	0	0	0	0	0	0	0	0	0	0
798	AX-147257270	Bat	B08	39.84	Araip.B08	3608931	B08_3608931_Bat	-	1	1	1	1	1	1	1	1	1	1	1	1	0	0	0	0	0	0	0	0	0	0	0	0	0	0	0	0	0	0	0	0	0	0	0	0	0	0	0	0	0
799	AX-147257315	Bat	B08	42.595	Araip.B08	4136509	B08_4136509_Bat	-	1	1	1	1	1	1	1	1	1	1	1	1	0	0	0	0	0	0	0	0	0	0	0	0	0	0	0	0	0	0	0	0	0	0	0	0	0	0	0	0	0
800	AX-147257484	Bat	B08	56.806	Araip.B08	6642505	B08_6642505_Bat	-	1	1	1	1	1	1	1	1	1	1	1	1	0	0	0	0	0	0	0	0	0	0	0	0	0	0	0	0	0	0	0	0	0	0	0	0	0	0	0	0	0
801	AX-147257496	Bat	B08	58.212	Araip.B08	7180609	B08_7180609_Bat	-	1	1	1	1	1	1	1	1	1	1	1	1	0	0	0	0	0	0	0	0	0	0	0	0	0	0	0	0	0	0	0	0	0	0	0	0	0	0	0	0	0
802	AX-147257575	Bat	B08	62.237	Araip.B08	8800146	B08_8800146_Bat	-	1	1	1	1	1	1	1	1	1	1	1	1	0	0	0	0	0	0	0	0	0	0	0	0	0	0	0	0	0	0	0	0	0	0	0	0	0	0	0	0	0
803	AX-147257589	Bat	B08	63.512	Araip.B08	9109213	B08_9109213_Bat	-	1	1	1	1	1	1	1	1	1	1	1	1	0	0	0	0	0	0	0	0	0	0	0	0	0	0	0	0	0	0	0	0	0	0	0	0	0	0	0	0	0
804	AX-147257604	Bat	B08	77.524	Araip.B08	9527707	B08_9527707_Bat	-	1	1	1	1	1	1	1	1	1	1	1	1	0	0	0	0	0	0	0	0	0	0	0	0	0	0	0	0	0	0	0	0	0	0	0	0	0	0	0	0	0
805	AX-147240657	Bat	B08	81.966	Araip.B02	7274745	B02_7274745_Bat	-	1	1	1	1	1	1	1	1	1	1	1	1	0	0	0	0	0	0	0	0	0	0	0	0	0	0	0	0	0	0	0	0	0	0	0	0	0	0	0	0	0
806	AX-147257766	Bat	B08	83.671	Araip.B08	14883080	B08_14883080_Bat	-	1	1	1	1	1	1	1	1	1	1	1	1	0	0	0	0	0	0	0	0	0	0	0	0	0	0	0	0	0	0	0	0	0	0	0	0	0	0	0	0	0
807	AX-147257944	Bat	B08	92.802	Araip.B08	22051920	B08_22051920_Bat	-	1	1	1	1	1	1	1	1	1	1	1	1	0	0	0	0	0	0	0	0	0	0	0	0	0	0	0	0	0	0	0	0	0	0	0	0	0	0	0	0	0
808	AX-147257969	Bat	B08	93.46	Araip.B08	22720982	B08_22720982_Bat	-	1	1	1	1	1	1	1	1	1	1	1	1	0	0	0	0	0	0	0	0	0	0	0	0	0	0	0	0	0	0	0	0	0	0	0	0	0	0	0	0	0
809	AX-147257928	Bat	B08	95.467	Araip.B08	21487186	B08_21487186_Bat	-	1	1	1	1	1	1	1	1	1	1	1	1	0	0	0	0	0	0	0	0	0	0	0	0	0	0	0	0	0	0	0	0	0	0	0	0	0	0	0	0	0
810	AX-147257990	Bat	B08	97.779	Araip.B08	23635067	B08_23635067_Bat	-	1	1	1	1	1	1	1	1	1	1	1	1	0	0	0	0	0	0	0	0	0	0	0	0	0	0	0	0	0	0	0	0	0	0	0	0	0	0	0	0	0
811	AX-147258047	Bat	B08	100.935	Araip.B08	26013615	B08_26013615_Bat	-	1	1	1	1	1	1	1	1	1	1	1	1	0	0	0	0	0	0	0	0	0	0	0	0	0	0	0	0	0	0	0	0	0	0	0	0	0	0	0	0	0
812	AX-147258300	Bat	B08	115.948	Araip.B08	45351170	B08_45351170_Bat	-	1	1	1	1	1	1	1	1	1	1	1	1	0	0	0	0	0	0	0	0	0	0	0	0	0	0	0	0	0	0	0	0	0	0	0	0	0	0	0	0	0
813	AX-147258254	Bat	B08	118.95	Araip.B08	42179335	B08_42179335_Bat	-	1	1	1	1	1	1	1	1	1	1	1	1	0	0	0	0	0	0	0	0	0	0	0	0	0	0	0	0	0	0	0	0	0	0	0	0	0	0	0	0	0
814	AX-147258624	Bat	B08	124.186	Araip.B08	103035345	B08_103035345_Bat	-	1	1	1	1	1	1	1	1	1	1	1	1	0	0	0	0	0	0	0	0	0	0	0	0	0	0	0	0	0	0	0	0	0	0	0	0	0	0	0	0	0
815	AX-147258558	Bat	B08	125.763	Araip.B08	97797942	B08_97797942_Bat	-	1	1	1	1	1	1	1	1	1	1	1	1	0	0	0	0	0	0	0	0	0	0	0	0	0	0	0	0	0	0	0	0	0	0	0	0	0	0	0	0	0
816	AX-147258555	Bat	B08	126.61	Araip.B08	97762318	B08_97762318_Bat	-	1	1	1	1	1	1	1	1	1	1	1	1	0	0	0	0	0	0	0	0	0	0	0	0	0	0	0	0	0	0	0	0	0	0	0	0	0	0	0	0	0
817	AX-147258321	Bat	B08	130.85	Araip.B08	47793525	B08_47793525_Bat	-	1	1	1	1	1	1	1	1	1	1	1	1	0	0	0	0	0	0	0	0	0	0	0	0	0	0	0	0	0	0	0	0	0	0	0	0	0	0	0	0	0
818	AX-147258310	Bat	B08	131.994	Araip.B08	46900789	B08_46900789_Bat	-	1	1	1	1	1	1	1	1	1	1	1	1	0	0	0	0	0	0	0	0	0	0	0	0	0	0	0	0	0	0	0	0	0	0	0	0	0	0	0	0	0
819	AX-147258718	Bat	B08	138.592	Araip.B08	107419341	B08_107419341_Bat	-	1	1	1	1	1	1	1	1	1	1	1	1	0	0	0	0	0	0	0	0	0	0	0	0	0	0	0	0	0	0	0	0	0	0	0	0	0	0	0	0	0
820	AX-147231175	Bat	B08	139.766	Araip.B08	108072587	B08_108072587_Bat	-	1	1	1	1	1	1	1	1	1	1	1	1	0	0	0	0	0	0	0	0	0	0	0	0	0	0	0	0	0	0	0	0	0	0	0	0	0	0	0	0	0
821	AX-147258709	Bat	B08	140.073	Araip.B08	107231756	B08_107231756_Bat	-	1	1	1	1	1	1	1	1	1	1	1	1	0	0	0	0	0	0	0	0	0	0	0	0	0	0	0	0	0	0	0	0	0	0	0	0	0	0	0	0	0
822	AX-147258811	Bat	B08	142.307	Araip.B08	111890724	B08_111890724_Bat	-	1	1	1	1	1	1	1	1	1	1	1	1	0	0	0	0	0	0	0	0	0	0	0	0	0	0	0	0	0	0	0	0	0	0	0	0	0	0	0	0	0
823	AX-147258902	Bat	B08	143.378	Araip.B08	115107805	B08_115107805_Bat	-	1	1	1	1	1	1	1	1	1	1	1	1	0	0	0	0	0	0	0	0	0	0	0	0	0	0	0	0	0	0	0	0	0	0	0	0	0	0	0	0	0
824	AX-147259082	Bat	B08	147.154	Araip.B08	119797710	B08_119797710_Bat	-	1	1	1	1	1	1	1	1	1	1	1	1	0	0	0	0	0	0	0	0	0	0	0	0	0	0	0	0	0	0	0	0	0	0	0	0	0	0	0	0	0
825	AX-147259180	Bat	B08	149.367	Araip.B08	122186860	B08_122186860_Bat	-	1	1	1	1	1	1	1	1	1	1	1	1	0	0	0	0	0	0	0	0	0	0	0	0	0	0	0	0	0	0	0	0	0	0	0	0	0	0	0	0	0
826	AX-147259174	Bat	B08	150.417	Araip.B08	122095822	B08_122095822_Bat	-	1	1	1	1	1	1	1	1	1	1	1	1	0	0	0	0	0	0	0	0	0	0	0	0	0	0	0	0	0	0	0	0	0	0	0	0	0	0	0	0	0
827	AX-147259182	Bat	B08	150.74	Araip.B08	122223999	B08_122223999_Bat	-	1	1	1	1	1	1	1	1	1	1	1	1	0	0	0	0	0	0	0	0	0	0	0	0	0	0	0	0	0	0	0	0	0	0	0	0	0	0	0	0	0
828	AX-147259123	Bat	B08	159.675	Araip.B08	120913013	B08_120913013_Bat	-	1	1	1	1	1	1	1	1	1	1	1	1	0	0	0	0	0	0	0	0	0	0	0	0	0	0	0	0	0	0	0	0	0	0	0	0	0	0	0	0	0
829	AX-147259163	Bat	B08	161.727	Araip.B08	121556595	B08_121556595_Bat	-	1	1	1	1	1	1	1	1	1	1	1	1	0	0	0	0	0	0	0	0	0	0	0	0	0	0	0	0	0	0	0	0	0	0	0	0	0	0	0	0	0
830	AX-147259233	Bat	B08	164.588	Araip.B08	123156664	B08_123156664_Bat	-	1	1	1	1	1	1	1	1	1	1	1	1	0	0	0	0	0	0	0	0	0	0	0	0	0	0	0	0	0	0	0	0	0	0	0	0	0	0	0	0	0
831	AX-147259301	Bat	B08	167.774	Araip.B08	124374378	B08_124374378_Bat	-	1	1	1	1	1	1	1	1	1	1	1	1	0	0	0	0	0	0	0	0	0	0	0	0	0	0	0	0	0	0	0	0	0	0	0	0	0	0	0	0	0
832	AX-147259404	Bat	B08	174.673	Araip.B08	126900291	B08_126900291_Bat	-	1	1	1	1	1	1	1	1	1	1	1	1	0	0	0	0	0	0	0	0	0	0	0	0	0	0	0	0	0	0	0	0	0	0	0	0	0	0	0	0	0
833	AX-147259405	Bat	B08	175.629	Araip.B08	126900333	B08_126900333_Bat	-	1	1	1	1	1	1	1	1	1	1	1	1	0	0	0	0	0	0	0	0	0	0	0	0	0	0	0	0	0	0	0	0	0	0	0	0	0	0	0	0	0
834	AX-147259508	Bat	B08	177.158	Araip.B08	128550706	B08_128550706_Bat	-	1	1	1	1	1	1	1	1	1	1	1	1	0	0	0	0	0	0	0	0	0	0	0	0	0	0	0	0	0	0	0	0	0	0	0	0	0	0	0	0	0
835	AX-147259569	Bat	B08	178.78	Araip.B08	129395945	B08_129395945_Bat	-	1	1	1	1	1	1	1	1	1	1	1	1	0	0	0	0	0	0	0	0	0	0	0	0	0	0	0	0	0	0	0	0	0	0	0	0	0	0	0	0	0
836	AX-147259639	Bat	B09	0	Araip.B09	820430	B09_820430_Bat	-	1	1	1	1	1	1	1	1	1	1	1	1	0	0	0	0	0	0	0	0	0	0	0	0	0	0	0	0	0	0	0	0	0	0	0	0	0	0	0	0	0
837	AX-147259661	Bat	B09	3.778	Araip.B09	1093370	B09_1093370_Bat	-	1	1	1	1	1	1	1	1	1	1	1	1	0	0	0	0	0	0	0	0	0	0	0	0	0	0	0	0	0	0	0	0	0	0	0	0	0	0	0	0	0
838	AX-147259703	Bat	B09	8.312	Araip.B09	1619980	B09_1619980_Bat	-	1	1	1	1	1	1	1	1	1	1	1	1	0	0	0	0	0	0	0	0	0	0	0	0	0	0	0	0	0	0	0	0	0	0	0	0	0	0	0	0	0
839	AX-147259787	Bat	B09	15.433	Araip.B09	2624818	B09_2624818_Bat	-	1	1	1	1	1	1	1	1	1	1	1	1	0	0	0	0	0	0	0	0	0	0	0	0	0	0	0	0	0	0	0	0	0	0	0	0	0	0	0	0	0
840	AX-147259902	Bat	B09	27.189	Araip.B09	4067865	B09_4067865_Bat	-	1	1	1	1	1	1	1	1	1	1	1	1	0	0	0	0	0	0	0	0	0	0	0	0	0	0	0	0	0	0	0	0	0	0	0	0	0	0	0	0	0
841	AX-147259938	Bat	B09	29.063	Araip.B09	4594394	B09_4594394_Bat	-	1	1	1	1	1	1	1	1	1	1	1	1	0	0	0	0	0	0	0	0	0	0	0	0	0	0	0	0	0	0	0	0	0	0	0	0	0	0	0	0	0
842	AX-147260202	Bat	B09	44.901	Araip.B09	10267117	B09_10267117_Bat	-	1	1	1	1	1	1	1	1	1	1	1	1	0	0	0	0	0	0	0	0	0	0	0	0	0	0	0	0	0	0	0	0	0	0	0	0	0	0	0	0	0
843	AX-147260375	Bat	B09	47.304	Araip.B09	11930085	B09_11930085_Bat	-	1	1	1	1	1	1	1	1	1	1	1	1	0	0	0	0	0	0	0	0	0	0	0	0	0	0	0	0	0	0	0	0	0	0	0	0	0	0	0	0	0
844	AX-147260411	Bat	B09	49.138	Araip.B09	12279083	B09_12279083_Bat	-	1	1	1	1	1	1	1	1	1	1	1	1	0	0	0	0	0	0	0	0	0	0	0	0	0	0	0	0	0	0	0	0	0	0	0	0	0	0	0	0	0
845	AX-147260449	Bat	B09	54.366	Araip.B09	13960122	B09_13960122_Bat	-	1	1	1	1	1	1	1	1	1	1	1	1	0	0	0	0	0	0	0	0	0	0	0	0	0	0	0	0	0	0	0	0	0	0	0	0	0	0	0	0	0
846	AX-147232753	Bat	B09	55.733	Araip.B04	110814287	B04_110814287_Bat	-	1	1	1	1	1	1	1	1	1	1	1	1	0	0	0	0	0	0	0	0	0	0	0	0	0	0	0	0	0	0	0	0	0	0	0	0	0	0	0	0	0
847	AX-147260518	Bat	B09	59.853	Araip.B09	15640616	B09_15640616_Bat	-	1	1	1	1	1	1	1	1	1	1	1	1	0	0	0	0	0	0	0	0	0	0	0	0	0	0	0	0	0	0	0	0	0	0	0	0	0	0	0	0	0
848	AX-147232812	Bat	B09	61.666	Araip.B09	16577417	B09_16577417_Bat	-	1	1	1	1	1	1	1	1	1	1	1	1	0	0	0	0	0	0	0	0	0	0	0	0	0	0	0	0	0	0	0	0	0	0	0	0	1	1	1	1	1
849	AX-147260643	Bat	B09	62.439	Araip.B09	19338001	B09_19338001_Bat	-	1	1	1	1	1	1	1	1	1	1	1	1	0	0	0	0	0	0	0	0	0	0	0	0	0	0	0	0	0	0	0	0	0	0	0	0	0	0	0	0	0
850	AX-147260586	Bat	B09	62.764	Araip.B09	17561151	B09_17561151_Bat	-	1	1	1	1	1	1	1	1	1	1	1	1	0	0	0	0	0	0	0	0	0	0	0	0	0	0	0	0	0	0	0	0	0	0	0	0	0	0	0	0	0
851	AX-147260650	Bat	B09	63.73	Araip.B09	19732123	B09_19732123_Bat	-	1	1	1	1	1	1	1	1	1	1	1	1	0	0	0	0	0	0	0	0	0	0	0	0	0	0	0	0	0	0	0	0	0	0	0	0	0	0	0	0	0
852	AX-147260691	Bat	B09	65.391	Araip.B09	21665230	B09_21665230_Bat	-	1	1	1	1	1	1	1	1	1	1	1	1	0	0	0	0	0	0	0	0	0	0	0	0	0	0	0	0	0	0	0	0	0	0	0	0	0	0	0	0	0
853	AX-147260789	Bat	B09	83.689	Araip.B09	25497890	B09_25497890_Bat	-	1	1	1	1	1	1	1	1	1	1	1	1	0	0	0	0	0	0	0	0	0	0	0	0	0	0	0	0	0	0	0	0	0	0	0	0	0	0	0	0	0
854	AX-147260792	Bat	B09	83.955	Araip.B09	25536327	B09_25536327_Bat	-	1	1	1	1	1	1	1	1	1	1	1	1	0	0	0	0	0	0	0	0	0	0	0	0	0	0	0	0	0	0	0	0	0	0	0	0	0	0	0	0	0
855	AX-147260826	Bat	B09	85.109	Araip.B09	26873815	B09_26873815_Bat	-	1	1	1	1	1	1	1	1	1	1	1	1	0	0	0	0	0	0	0	0	0	0	0	0	0	0	0	0	0	0	0	0	0	0	0	0	0	0	0	0	0
856	AX-147261248	Bat	B09	88.983	Araip.B09	88847854	B09_88847854_Bat	-	1	1	1	1	1	1	1	1	1	1	1	1	0	0	0	0	0	0	0	0	0	0	0	0	0	0	0	0	0	0	0	0	0	0	0	0	0	0	0	0	0
857	AX-147261313	Bat	B09	89.478	Araip.B09	102419381	B09_102419381_Bat	-	1	1	1	1	1	1	1	1	1	1	1	1	0	0	0	0	0	0	0	0	0	0	0	0	0	0	0	0	0	0	0	0	0	0	0	0	0	0	0	0	0
858	AX-147261255	Bat	B09	90.389	Araip.B09	89526297	B09_89526297_Bat	-	1	1	1	1	1	1	1	1	1	1	1	1	0	0	0	0	0	0	0	0	0	0	0	0	0	0	0	0	0	0	0	0	0	0	0	0	0	0	0	0	0
859	AX-147261070	Bat	B09	90.953	Araip.B09	48924509	B09_48924509_Bat	-	1	1	1	1	1	1	1	1	1	1	1	1	0	0	0	0	0	0	0	0	0	0	0	0	0	0	0	0	0	0	0	0	0	0	0	0	0	0	0	0	0
860	AX-147261301	Bat	B09	91.209	Araip.B09	101925097	B09_101925097_Bat	-	1	1	1	1	1	1	1	1	1	1	1	1	0	0	0	0	0	0	0	0	0	0	0	0	0	0	0	0	0	0	0	0	0	0	0	0	0	0	0	0	0
861	AX-147261408	Bat	B09	92.152	Araip.B09	112638595	B09_112638595_Bat	-	1	1	1	1	1	1	1	1	1	1	1	1	0	0	0	0	0	0	0	0	0	0	0	0	0	0	0	0	0	0	0	0	0	0	0	0	0	0	0	0	0
862	AX-147261411	Bat	B09	92.56	Araip.B09	112644523	B09_112644523_Bat	-	1	1	1	1	1	1	1	1	1	1	1	1	0	0	0	0	0	0	0	0	0	0	0	0	0	0	0	0	0	0	0	0	0	0	0	0	0	0	0	0	0
863	AX-147261343	Bat	B09	93.939	Araip.B09	105680394	B09_105680394_Bat	-	1	1	1	1	1	1	1	1	1	1	1	1	0	0	0	0	0	0	0	0	0	0	0	0	0	0	0	0	0	0	0	0	0	0	0	0	0	0	0	0	0
864	AX-147261388	Bat	B09	95.239	Araip.B09	111618121	B09_111618121_Bat	-	1	1	1	1	1	1	1	1	1	1	1	1	0	0	0	0	0	0	0	0	0	0	0	0	0	0	0	0	0	0	0	0	0	0	0	0	0	0	0	0	0
865	AX-147261463	Bat	B09	96.941	Araip.B09	115218860	B09_115218860_Bat	-	1	1	1	1	1	1	1	1	1	1	1	1	0	0	0	0	0	0	0	0	0	0	0	0	0	0	0	0	0	0	0	0	0	0	0	0	0	0	0	0	0
866	AX-147261522	Bat	B09	99.048	Araip.B09	120664272	B09_120664272_Bat	-	1	1	1	1	1	1	1	1	1	1	1	1	0	0	0	0	0	0	0	0	0	0	0	0	0	0	0	0	0	0	0	0	0	0	0	0	0	0	0	0	0
867	AX-147261631	Bat	B09	100.088	Araip.B09	125211934	B09_125211934_Bat	-	1	1	1	1	1	1	1	1	1	1	1	1	0	0	0	0	0	0	0	0	0	0	0	0	0	0	0	0	0	0	0	0	0	0	0	0	0	0	0	0	0
868	AX-147261789	Bat	B09	102.703	Araip.B09	131919794	B09_131919794_Bat	-	1	1	1	1	1	1	1	1	1	1	1	1	0	0	0	0	0	0	0	0	0	0	0	0	0	0	0	0	0	0	0	0	0	0	0	0	0	0	0	0	0
869	AX-147261853	Bat	B09	103.662	Araip.B09	135376574	B09_135376574_Bat	-	1	1	1	1	1	1	1	1	1	1	1	1	0	0	0	0	0	0	0	0	0	0	0	0	0	0	0	0	0	0	0	0	0	0	0	0	0	0	0	0	0
870	AX-147261938	Bat	B09	106.297	Araip.B09	137323602	B09_137323602_Bat	-	1	1	1	1	1	1	1	1	1	1	1	1	0	0	0	0	0	0	0	0	0	0	0	0	0	0	0	0	0	0	0	0	0	0	0	0	0	0	0	0	0
871	AX-147261958	Bat	B09	110.277	Araip.B09	137668463	B09_137668463_Bat	-	1	1	1	1	1	1	1	1	1	1	1	1	0	0	0	0	0	0	0	0	0	0	0	0	0	0	0	0	0	0	0	0	0	0	0	0	0	0	0	0	0
872	AX-147262112	Bat	B09	115.312	Araip.B09	140643252	B09_140643252_Bat	-	1	1	1	1	1	1	1	1	1	1	1	1	0	0	0	0	0	0	0	0	0	0	0	0	0	0	0	0	0	0	0	0	0	0	0	0	0	0	0	0	0
873	AX-147262241	Bat	B09	121.763	Araip.B09	142214599	B09_142214599_Bat	-	1	1	1	1	1	1	1	1	1	1	1	1	0	0	0	0	0	0	0	0	0	0	0	0	0	0	0	0	0	0	0	0	0	0	0	0	0	0	0	0	0
874	AX-147262258	Bat	B09	123.273	Araip.B09	142396010	B09_142396010_Bat	-	1	1	1	1	1	1	1	1	1	1	1	1	0	0	0	0	0	0	0	0	0	0	0	0	0	0	0	0	0	0	0	0	0	0	0	0	0	0	0	0	0
875	AX-147262299	Bat	B09	125.68	Araip.B09	142796440	B09_142796440_Bat	-	1	1	1	1	1	1	1	1	1	1	1	1	0	0	0	0	0	0	0	0	0	0	0	0	0	0	0	0	0	0	0	0	0	0	0	0	0	0	0	0	0
876	AX-147262582	Bat	B09	155.709	Araip.B09	145503127	B09_145503127_Bat	-	1	1	1	1	1	1	1	1	1	1	1	1	0	0	0	0	0	0	0	0	0	0	0	0	0	0	0	0	0	0	0	0	0	0	0	0	0	0	0	0	0
877	AX-147262597	Bat	B09	160.081	Araip.B09	145693126	B09_145693126_Bat	-	1	1	1	1	1	1	1	1	1	1	1	1	0	0	0	0	0	0	0	0	0	0	0	0	0	0	0	0	0	0	0	0	0	0	0	0	0	0	0	0	0
878	AX-147262639	Bat	B09	166.058	Araip.B09	146129189	B09_146129189_Bat	-	1	1	1	1	1	1	1	1	1	1	1	1	0	0	0	0	0	0	0	0	0	0	0	0	0	0	0	0	0	0	0	0	0	0	0	0	0	0	0	0	0
879	AX-147262661	Bat	B09	168.891	Araip.B09	146449440	B09_146449440_Bat	-	1	1	1	1	1	1	1	1	1	1	1	1	0	0	0	0	0	0	0	0	0	0	0	0	0	0	0	0	0	0	0	0	0	0	0	0	0	0	0	0	0
880	AX-147262665	Bat	B09	170.835	Araip.B09	146486491	B09_146486491_Bat	-	1	1	1	1	1	1	1	1	1	1	1	1	0	0	0	0	0	0	0	0	0	0	0	0	0	0	0	0	0	0	0	0	0	0	0	0	0	0	0	0	0
881	AX-147264937	Bat	B10	96.765	Araip.B10	130555022	B10_130555022_Bat	-	1	1	1	1	1	1	1	1	1	1	1	1	0	0	0	0	0	0	0	0	0	0	0	0	0	0	0	0	0	0	0	0	0	0	0	0	0	0	0	0	0
882	AX-147265599	Bat	B10	147.793	Araip.B10	136009645	B10_136009645_Bat	-	1	1	1	1	1	1	1	1	1	1	1	1	0	0	0	0	0	0	0	0	0	0	0	0	0	0	0	0	0	0	0	0	0	0	0	0	0	0	0	0	0
883	AX-147265430	Bat	B10	151.647	Araip.B10	134846322	B10_134846322_Bat	-	1	1	1	1	1	1	1	1	1	1	1	1	0	0	0	0	0	0	0	0	0	0	0	0	0	0	0	0	0	0	0	0	0	0	0	0	0	0	0	0	0
884	AX-147265407	Bat	B10	153.02	Araip.B10	134693751	B10_134693751_Bat	-	1	1	1	1	1	1	1	1	1	1	1	1	0	0	0	0	0	0	0	0	0	0	0	0	0	0	0	0	0	0	0	0	0	0	0	0	0	0	0	0	0
885	AX-147265307	Bat	B10	156.871	Araip.B10	134076186	B10_134076186_Bat	-	1	1	1	1	1	1	1	1	1	1	1	1	0	0	0	0	0	0	0	0	0	0	0	0	0	0	0	0	0	0	0	0	0	0	0	0	0	0	0	0	0
886	AX-147265297	Bat	B10	157.675	Araip.B10	133993166	B10_133993166_Bat	-	1	1	1	1	1	1	1	1	1	1	1	1	0	0	0	0	0	0	0	0	0	0	0	0	0	0	0	0	0	0	0	0	0	0	0	0	0	0	0	0	0
887	AX-147265290	Bat	B10	158.888	Araip.B10	133964405	B10_133964405_Bat	-	1	1	1	1	1	1	1	1	1	1	1	1	0	0	0	0	0	0	0	0	0	0	0	0	0	0	0	0	0	0	0	0	0	0	0	0	0	0	0	0	0
888	AX-147265249	Bat	B10	160.22	Araip.B10	133727172	B10_133727172_Bat	-	1	1	1	1	1	1	1	1	1	1	1	1	0	0	0	0	0	0	0	0	0	0	0	0	0	0	0	0	0	0	0	0	0	0	0	0	0	0	0	0	0
889	AX-147265134	Bat	B10	163.384	Araip.B10	132785375	B10_132785375_Bat	-	1	1	1	1	1	1	1	1	1	1	1	1	0	0	0	0	0	0	0	0	0	0	0	0	0	0	0	0	0	0	0	0	0	0	0	0	0	0	0	0	0
890	AX-147265217	Bat	B10	165.927	Araip.B10	133561666	B10_133561666_Bat	-	1	1	1	1	1	1	1	1	1	1	1	1	0	0	0	0	0	0	0	0	0	0	0	0	0	0	0	0	0	0	0	0	0	0	0	0	0	0	0	0	0
891	AX-147265330	Bat	B10	167.67	Araip.B10	134157897	B10_134157897_Bat	-	1	1	1	1	1	1	1	1	1	1	1	1	0	0	0	0	0	0	0	0	0	0	0	0	0	0	0	0	0	0	0	0	0	0	0	0	0	0	0	0	0
[truncated: 81 more columns]

## Sheet: Table S9
Generation	Genotype	Weight	Length	Width	Pedigree		Welch t-test to determine significant differences between the means of two pair of backcross generations
Cultivated	A. hypogaea Runner886	0.51	12.61	8.4	A. hypogaea Runner886		Weight (g)
Cultivated	A. hypogaea Runner886	0.55	13.27	8.79	A. hypogaea Runner886		Generation	Wild	Cultivated	BC1F1	BC2F1	BC3F1	BC3F2	BC4F1
Cultivated	A. hypogaea Runner886	0.63	15.2	9.74	A. hypogaea Runner886		Wild	-	< 2.2e-16	2.526e-07	< 2.2e-16	< 2.2e-16	< 2.2e-16	< 2.2e-16
Cultivated	A. hypogaea Runner886	0.68	13.55	9.81	A. hypogaea Runner886		Cultivated	< 2.2e-16	-	0.3503	0.1975	1.101e-05	0.01251	0.007515
Cultivated	A. hypogaea Runner886	0.57	14.68	10.49	A. hypogaea Runner886		BC1F1	2.526e-07	0.3503	-	0.7122	0.9062	0.7131	0.9078
Cultivated	A. hypogaea Runner886	0.94	17.77	10.57	A. hypogaea Runner886		BC2F1	< 2.2e-16	0.1975	0.7122	-	0.2307	0.9549	0.5544
Cultivated	A. hypogaea Runner886	0.88	17.32	10.98	A. hypogaea Runner886		BC3F1	< 2.2e-16	1.101e-05	0.9062	0.2307	-	0.01654	0.4047
Cultivated	A. hypogaea Runner886	0.78	15.33	11	A. hypogaea Runner886		BC3F2	< 2.2e-16	0.01251	0.7131	0.9549	0.01654	-	0.3749
Cultivated	A. hypogaea Runner886	0.93	16.39	11.21	A. hypogaea Runner886		BC4F1	< 2.2e-16	0.007515	0.9078	0.5544	0.4047	0.3749	-
Cultivated	A. hypogaea Runner886	0.89	14.63	11.26	A. hypogaea Runner886		Significant P<0.05 in green; Not significant P>0.05 in orange; Not significant P>0.01 in yellow
Cultivated	A. hypogaea 5-646-10	0.77	16.26		A. hypogaea 5-646-10
Cultivated	A. hypogaea 5-646-10	0.67	17.3	9.78	A. hypogaea 5-646-10		Lenght (mm)
Cultivated	A. hypogaea 5-646-10	1.03	20.11	10.1	A. hypogaea 5-646-10		Generation	Wild	Cultivated	BC1F1	BC2F1	BC3F1	BC3F2	BC4F1
Cultivated	A. hypogaea 5-646-10	0.83	17.42	10.24	A. hypogaea 5-646-10		Wild	-	< 2.2e-16	NA	< 2.2e-16	< 2.2e-16	< 2.2e-16	6.013e-16
Cultivated	A. hypogaea 5-646-10	0.81	18.08	10.39	A. hypogaea 5-646-10		Cultivated	< 2.2e-16	-	0.03889	0.001704	< 2.2e-16	0.02196	-
Cultivated	A. hypogaea 5-646-10	0.74	16.55	10.4	A. hypogaea 5-646-10		BC1F1	NA	NA	-	NA	NA	NA	NA
Cultivated	A. hypogaea 5-646-10	0.74	14.3	10.64	A. hypogaea 5-646-10		BC2F1	< 2.2e-16	0.03889	NA	-	0.8937	< 2.2e-16	0.7083
Cultivated	A. hypogaea 5-646-10	0.86	20.22	10.69	A. hypogaea 5-646-10		BC3F1	< 2.2e-16	0.001704	NA	0.8937	-	< 2.2e-16	0.3953
Cultivated	A. hypogaea 5-646-10	0.88	15.94	11.18	A. hypogaea 5-646-10		BC3F2	< 2.2e-16	< 2.2e-16	NA	< 2.2e-16	< 2.2e-16	-	< 2.2e-16
Cultivated	A. hypogaea 5-646-10	0.79	15.89	11.2	A. hypogaea 5-646-10		BC4F1	6.013e-16	0.02196	NA	0.7083	0.3953	< 2.2e-16	-
Cultivated	A. hypogaea 13-1014	0.58	16.28	8.5	A. hypogaea 13-1014		Significant P<0.05 in green; Not significant P>0.05 in orange; Not significant P>0.01 in yellow
Cultivated	A. hypogaea 13-1014	0.84	17.83	10.03	A. hypogaea 13-1014
Cultivated	A. hypogaea 13-1014	0.77	15.3	10.45	A. hypogaea 13-1014		Width (mm)
Cultivated	A. hypogaea 13-1014	0.91	19.89	10.57	A. hypogaea 13-1014		Generation	Wild	Cultivated	BC1F1	BC2F1	BC3F1	BC3F2	BC4F1
Cultivated	A. hypogaea 13-1014	0.86	18.43	10.64	A. hypogaea 13-1014		Wild	-	< 2.2e-16	NA	< 2.2e-16	< 2.2e-16	< 2.2e-16	< 2.2e-16
Cultivated	A. hypogaea 13-1014	0.78	17.06	11.01	A. hypogaea 13-1014		Cultivated	< 2.2e-16	-	NA	0.148	4.269e-05	0.2852	0.8618
Cultivated	A. hypogaea 13-1014	0.87	17.84	11.08	A. hypogaea 13-1014		BC1F1	NA	NA	-	NA	NA	NA	NA
Cultivated	A. hypogaea 13-1014	0.87	17.63	11.11	A. hypogaea 13-1014		BC2F1	< 2.2e-16	0.148	NA	-	0.196	0.3734	0.2667
Cultivated	A. hypogaea 13-1014	0.94	19.94	11.52	A. hypogaea 13-1014		BC3F1	< 2.2e-16	4.269e-05	NA	0.196	-	0.0001868	0.005401
Cultivated	A. hypogaea 13-1014	0.97	20.19	11.54	A. hypogaea 13-1014		BC3F2	< 2.2e-16	0.2852	NA	0.3734	0.0001868	-	0.5853
Cultivated	A. hypogaea TifGp-2	0.7	17.09	9.06	A. hypogaea TifGp-2		BC4F1	< 2.2e-16	0.8618	NA	0.2667	0.005401	0.5853	-
Cultivated	A. hypogaea TifGp-2	0.91	16.64	9.17	A. hypogaea TifGp-2		Significant P<0.05 in green; Not significant P>0.05 in orange; Not significant P>0.01 in yellow
Cultivated	A. hypogaea TifGp-2	0.64	16.48	9.2	A. hypogaea TifGp-2
Cultivated	A. hypogaea TifGp-2	0.64	16.08	9.53	A. hypogaea TifGp-2
Cultivated	A. hypogaea TifGp-2	0.79	17.66	9.79	A. hypogaea TifGp-2
Cultivated	A. hypogaea TifGp-2	0.59	14.23	9.84	A. hypogaea TifGp-2
Cultivated	A. hypogaea TifGp-2	0.65	14.49	9.88	A. hypogaea TifGp-2
Cultivated	A. hypogaea TifGp-2	0.76	17.52	9.88	A. hypogaea TifGp-2
Cultivated	A. hypogaea TifGp-2	0.91	17.35	10.82	A. hypogaea TifGp-2
Cultivated	A. hypogaea TifGp-2	0.89	17.31	10.89	A. hypogaea TifGp-2
Wild	A. stenosperma V10309	0.17	12.11	4.93	A. stenosperma V10309
Wild	A. stenosperma V10309	0.17	11.9	5.01	A. stenosperma V10309
Wild	A. stenosperma V10309	0.16	11.84	5.07	A. stenosperma V10309
Wild	A. stenosperma V10309	0.16	11.59	5.08	A. stenosperma V10309
Wild	A. stenosperma V10309	0.17	12.07	5.16	A. stenosperma V10309
Wild	A. stenosperma V10309	0.17	11.95	5.17	A. stenosperma V10309
Wild	A. stenosperma V10309	0.19	13.39	5.29	A. stenosperma V10309
Wild	A. stenosperma V10309	0.17	11.1	5.34	A. stenosperma V10309
Wild	A. stenosperma V10309	0.16	11.23	5.47	A. stenosperma V10309
Wild	A. stenosperma V10309	0.19	11.38	5.57	A. stenosperma V10309
Wild	A. batizocoi K9484	0.14	11.43	5.01	A. batizocoi K9484
Wild	A. batizocoi K9484	0.25	13.63	5.88	A. batizocoi K9484
Wild	A. batizocoi K9484	0.21	12.74	5.69	A. batizocoi K9484
Wild	A. batizocoi K9484	0.23	12.93	5.73	A. batizocoi K9484
Wild	A. batizocoi K9484	0.31	14.7	6.33	A. batizocoi K9484
Wild	A. batizocoi K9484	0.18	11.96	5.28	A. batizocoi K9484
Wild	A. batizocoi K9484	0.28	14.53	6.37	A. batizocoi K9484
Wild	A. batizocoi K9484	0.19	12.49	5.55	A. batizocoi K9484
Wild	A. batizocoi K9484	0.24	13.87	5.77	A. batizocoi K9484
Wild	A. batizocoi K9484	0.17	11.26	5.42	A. batizocoi K9484
Wild	Batsten1	0.13	12.25	4.34	Batsten1
Wild	Batsten1	0.13	11.18	4.8	Batsten1
Wild	Batsten1	0.14	11.79	4.9	Batsten1
Wild	Batsten1	0.16	12.27	4.91	Batsten1
Wild	Batsten1	0.19	13.67	5.08	Batsten1
Wild	Batsten1	0.18	12.58	5.15	Batsten1
Wild	Batsten1	0.18	12.43	5.24	Batsten1
Wild	Batsten1	0.2	14.45	5.31	Batsten1
Wild	Batsten1	0.16	12.23	5.39	Batsten1
Wild	Batsten1	0.18	12.39	5.41	Batsten1
BC1F1	-	0.29	NA	NA	5-646-10 x [Runner 886 x (A. batizocoi K9484 x A. stenosperma V10309)4x] F2:34_Tifton_F3:6
BC1F1	-	0.4	NA	NA	TifGP-2 x [Runner 886 x (A. batizocoi K9484 x A. stenosperma V10309)4x] F2:34_Tifton_F3:6
BC1F1	-	0.41	NA	NA	TifGP-2 x [Runner 886 x (A. batizocoi K9484 x A. stenosperma V10309)4x] F2:7_Tifton_F3:5
BC1F1	-	0.55	NA	NA	5-646-10 x [Runner 886 x (A. batizocoi K9484 x A. stenosperma V10309)4x] F2:7_Tifton_F3:5]_F1:3
BC1F1	-	0.59	NA	NA	5-646-10 x [Runner 886 x (A. batizocoi K9484 x A. stenosperma V10309)4x] F2:7_Tifton_F3:5]_F1:4
BC1F1	-	0.66	NA	NA	5-646-10 x [Runner 886 x (A. batizocoi K9484 x A. stenosperma V10309)4x] F2:7_Tifton_F3:5]_F1:7
BC1F1	-	0.68	NA	NA	TifGP-2 x [Runner 886 x (A. batizocoi K9484 x A. stenosperma V10309)4x] F2:34_Tifton_F3:6
BC1F1	-	0.71	NA	NA	5-646-10 x [Runner 886 x (A. batizocoi K9484 x A. stenosperma V10309)4x] F2:7_Tifton_F3:5]_F1:6
BC1F1	-	1.01	NA	NA	5-646-10 x [Runner 886 x (A. batizocoi K9484 x A. stenosperma V10309)4x] F2:7_Athens_F3:1
BC1F1	-	1.46	NA	NA	TifGP-2 x [Runner 886 x (A. batizocoi K9484 x A. stenosperma V10309)4x] F2:34_Athens_F3:1
BC1F1	-	NA	NA	NA	TifGP-2 x [Runner 886 x (A. batizocoi K9484 x A. stenosperma V10309)4x] F2:7_Tifton_F3:5
BC2F1	-	0.28	12.75	7.48	13-1014 (= C1805-617-1 xA-06G) x BRD_C0010 [5-646-10 x [Runner 886 x (A. batizocoi K9484 x A. stenosperma V10309)4x] F2:7_Tifton_F3:5]_F1:3
BC2F1	-	0.25	11.01	7.53	13-1014 (= C1805-617-1 xA-06G) x BRD_C0010 [5-646-10 x [Runner 886 x (A. batizocoi K9484 x A. stenosperma V10309)4x] F2:7_Tifton_F3:5]_F1:6
BC2F1	-	0.53	16.23	7.69	13-2113 (= C1805-2-9-16 x C725-19-25) x BRD_C0010 [5-646-10 x [Runner 886 x (A. batizocoi K9484 x A. stenosperma V10309)4x] F2:7_Tifton_F3:5]_F1:4
BC2F1	-	0.43	11.54	8.47	5-646-10 x BRD_C0010 [5-646-10 x [Runner 886 x (A. batizocoi K9484 x A. stenosperma V10309)4x] F2:7_Tifton_F3:5]_F1:6
BC2F1	-	0.42	13.77	8.56	13-1014 (= C1805-617-1 xA-06G) x BRD_C0010 [5-646-10 x [Runner 886 x (A. batizocoi K9484 x A. stenosperma V10309)4x] F2:7_Tifton_F3:5]_F1:3
BC2F1	-	0.54	15.04	8.7	5-646-10 x BRD_C0010 [5-646-10 x [Runner 886 x (A. batizocoi K9484 x A. stenosperma V10309)4x] F2:7_Tifton_F3:5]_F1:6
BC2F1	-	0.68	17.27	8.98	5-646-10 x BRD_C0010 [5-646-10 x [Runner 886 x (A. batizocoi K9484 x A. stenosperma V10309)4x] F2:7_Tifton_F3:5]_F1:6
BC2F1	-	0.62	14.21	9.09	5-646-10 x BC1F1:49 [5-646-10 x [Runner 886 x (A. batizocoi K9484 x A. stenosperma V10309)4x] F2:7_Athens_F3:1]
BC2F1	-	0.76	16.08	9.1	5-646-10 x BRD_C0010 [5-646-10 x [Runner 886 x (A. batizocoi K9484 x A. stenosperma V10309)4x] F2:7_Tifton_F3:5]_F1:3
BC2F1	-	0.67	14.54	9.3	5-646-10 x BRD_C0010 [5-646-10 x [Runner 886 x (A. batizocoi K9484 x A. stenosperma V10309)4x] F2:7_Tifton_F3:5]_F1:6
BC2F1	-	0.64	15.64	9.32	13-2113 (= C1805-2-9-16 x C725-19-25) x BRD_C0010 [5-646-10 x [Runner 886 x (A. batizocoi K9484 x A. stenosperma V10309)4x] F2:7_Tifton_F3:5]_F1:7
BC2F1	-	0.66	15.1	9.65	5-646-10 x BRD_C0010 [5-646-10 x [Runner 886 x (A. batizocoi K9484 x A. stenosperma V10309)4x] F2:7_Tifton_F3:5]_F1:3
BC2F1	-	0.73	14.91	9.69	5-646-10 x BRD_C0010 [5-646-10 x [Runner 886 x (A. batizocoi K9484 x A. stenosperma V10309)4x] F2:7_Tifton_F3:5]_F1:6
BC2F1	-	0.75	15.79	9.93	13-2113 (= C1805-2-9-16 x C725-19-25) x BRD_C0010 [5-646-10 x [Runner 886 x (A. batizocoi K9484 x A. stenosperma V10309)4x] F2:7_Tifton_F3:5]_F1:7
BC2F1	-	0.68	15.33	9.97	5-646-10 x BRD_C0010 [5-646-10 x [Runner 886 x (A. batizocoi K9484 x A. stenosperma V10309)4x] F2:7_Tifton_F3:5]_F1:6
BC2F1	-	0.72	16.85	9.97	13-1014 (= C1805-617-1 xA-06G) x BRD_C0010 [5-646-10 x [Runner 886 x (A. batizocoi K9484 x A. stenosperma V10309)4x] F2:7_Tifton_F3:5]_F1:6
BC2F1	-	0.84	18.74	10.01	13-1014 (= C1805-617-1 xA-06G) x BRD_C0010 [5-646-10 x [Runner 886 x (A. batizocoi K9484 x A. stenosperma V10309)4x] F2:7_Tifton_F3:5]_F1:6
BC2F1	-	0.84	16.83	10.24	5-646-10 x BRD_C0010 [5-646-10 x [Runner 886 x (A. batizocoi K9484 x A. stenosperma V10309)4x] F2:7_Tifton_F3:5]_F1:3
BC2F1	-	0.66	14.01	10.29	5-646-10 x BRD_C0010 [5-646-10 x [Runner 886 x (A. batizocoi K9484 x A. stenosperma V10309)4x] F2:7_Tifton_F3:5]_F1:3
BC2F1	-	0.76	17.18	10.3	5-646-10 x BRD_C0010 [5-646-10 x [Runner 886 x (A. batizocoi K9484 x A. stenosperma V10309)4x] F2:7_Tifton_F3:5]_F1:7
BC2F1	-	0.69	16.48	10.36	5-646-10 x BRD_C0010 [5-646-10 x [Runner 886 x (A. batizocoi K9484 x A. stenosperma V10309)4x] F2:7_Tifton_F3:5]_F1:6
BC2F1	-	0.6	13.54	10.39	13-1014 (= C1805-617-1 xA-06G) x BRD_C0010 [5-646-10 x [Runner 886 x (A. batizocoi K9484 x A. stenosperma V10309)4x] F2:7_Tifton_F3:5]_F1:3
BC2F1	-	0.7	13.5	10.41	5-646-10 x BRD_C0010 [5-646-10 x [Runner 886 x (A. batizocoi K9484 x A. stenosperma V10309)4x] F2:7_Tifton_F3:5]_F1:3
BC2F1	-	0.84	16.05	10.53	13-2113 (= C1805-2-9-16 x C725-19-25) x BRD_C0010 [5-646-10 x [Runner 886 x (A. batizocoi K9484 x A. stenosperma V10309)4x] F2:7_Tifton_F3:5]_F1:7
BC2F1	-	0.77	17.41	10.64	13-2113 (= C1805-2-9-16 x C725-19-25) x BRD_C0010 [5-646-10 x [Runner 886 x (A. batizocoi K9484 x A. stenosperma V10309)4x] F2:7_Tifton_F3:5]_F1:7
BC2F1	-	0.92	16.56	10.76	5-646-10 x BRD_C0010 [5-646-10 x [Runner 886 x (A. batizocoi K9484 x A. stenosperma V10309)4x] F2:7_Tifton_F3:5]_F1:7
BC2F1	-	0.99	16.57	11.3	5-646-10 x BRD_C0010 [5-646-10 x [Runner 886 x (A. batizocoi K9484 x A. stenosperma V10309)4x] F2:7_Tifton_F3:5]_F1:7
BC2F1	-	1.02	16.81	11.62	5-646-10 x BRD_C0010 [5-646-10 x [Runner 886 x (A. batizocoi K9484 x A. stenosperma V10309)4x] F2:7_Tifton_F3:5]_F1:3
BC2F1	-	1.14	18.5	11.88	5-646-10 x BC1F1:C2633-2_3 [5-646-10 x [Runner 886 x (A. batizocoi K9484 x A. stenosperma V10309)4x] F2:34_Tifton_F3:6]
BC2F1	-	1.47	21.46	13.91	5-646-10 x BC1F1:C2633-2_3 [5-646-10 x [Runner 886 x (A. batizocoi K9484 x A. stenosperma V10309)4x] F2:34_Tifton_F3:6]
BC3F1	BC3F1_RBS_sd26_S7	0.58	15.21	8.73	BRD_C0111=5-646-10xBRD_C56[13-1014 x BRD_C10 [5-646-10 x [ 886 x (A. bat K9484 x A. sten V10309)4x] F2:7_T_F3:5]_F1:6]
BC3F1	BC3F1_RBS_sd26_S20	0.31	12.23	6.85	BRD_C0111=5-646-10xBRD_C56[13-1014 x BRD_C10 [5-646-10 x [ 886 x (A. bat K9484 x A. sten V10309)4x] F2:7_T_F3:5]_F1:6]
BC3F1	BC3F1_RBS_sd36_S3	0.34	12.22	7.9	BRD_C0114=5-646-10xBRD_C58[13-2113x BRD_C10 [5-646-10 x [ 886 x (A. bat K9484 x A. sten V10309)4x] F2:7_T_F3:5]_F1:7]
BC3F1	BC3F1_BRD_C0049_Seed7_S10	0.34	11.89	8.24	5-646-10 x [5-646-10 x BRD_C0010 [5-646-10 x [Runner 886 x (A. batizocoi K9484 x A. stenosperma V10309)4x] F2:7_Tifton_F3:5]_F1:3]
BC3F1	BC3F1_RBS_sd36_S1	0.75	14.36	11.35	BRD_C0114=5-646-10xBRD_C58[13-2113x BRD_C10 [5-646-10 x [ 886 x (A. bat K9484 x A. sten V10309)4x] F2:7_T_F3:5]_F1:7]
BC3F1	BC3F1_RBS_sd36_S4	0.25	9.22	7.81	BRD_C0114=5-646-10xBRD_C58[13-2113x BRD_C10 [5-646-10 x [ 886 x (A. bat K9484 x A. sten V10309)4x] F2:7_T_F3:5]_F1:7]
BC3F1	BC3F1_RBS_sd36_S2	0.73	16.2	9.78	BRD_C0114=5-646-10xBRD_C58[13-2113x BRD_C10 [5-646-10 x [ 886 x (A. bat K9484 x A. sten V10309)4x] F2:7_T_F3:5]_F1:7]
BC3F1	BC3F1_RBS_sd36_S7	0.16	12.27	4.72	BRD_C0114=5-646-10xBRD_C58[13-2113x BRD_C10 [5-646-10 x [ 886 x (A. bat K9484 x A. sten V10309)4x] F2:7_T_F3:5]_F1:7]
BC3F1	BC3F1:C2633-2_3(16)_S70	0.79	15.66	10.86	5-646-10 x [ 5-646-10 x BC1F1:C2633-2_3 [5-646-10 x [Runner 886 x (A. batizocoi K9484 x A. stenosperma V10309)4x] F2:34_Tifton_F3:6]]
BC3F1	BC3F1_RBS_sd11_S7	0.73	15.7	10.56	BRD_C0109=5-646-10xBRD_C50[13-1014 x BRD_C10 [5-646-10 x [ 886 x (A. bat K9484 x A. sten V10309)4x] F2:7_T_F3:5]_F1:3]
BC3F1	BC3F1_RBS_sd26_S21	0.22	12.71	5.47	BRD_C0111=5-646-10xBRD_C56[13-1014 x BRD_C10 [5-646-10 x [ 886 x (A. bat K9484 x A. sten V10309)4x] F2:7_T_F3:5]_F1:6]
BC3F1	BC3F1:C2633-2_3(16)_S55	0.7	17.42	10.06	5-646-10 x [ 5-646-10 x BC1F1:C2633-2_3 [5-646-10 x [Runner 886 x (A. batizocoi K9484 x A. stenosperma V10309)4x] F2:34_Tifton_F3:6]]
BC3F1	BC3F1_BRD_C0050_Seed9_S57	0.83	19.48	10.92	13-1014 x [13-1014 (= C1805-617-1 x GA-06G) x BRD_C0010 [5-646-10 x [Runner 886 x (A. batizocoi K9484 x A. stenosperma V10309)4x] F2:7_Tifton_F3:5]_F1:3]
BC3F1	BC3F1_RBS_sd14_S9	0.36	11.79	7.92	BRD_C0115=5-646-10xBRD_C55[5-646-10 x BRD_C10 [5-646-10 x [ 886 x (A. bat K9484 x A. sten V10309)4x] F2:7_T_F3:5]_F1:6]
BC3F1	BC3F1_RBS_sd26_S1	0.96	16.38	11.39	BRD_C0111=5-646-10xBRD_C56[13-1014 x BRD_C10 [5-646-10 x [ 886 x (A. bat K9484 x A. sten V10309)4x] F2:7_T_F3:5]_F1:6]
BC3F1	BC3F1_BRD_C0050_Seed9_S44	0.5	13.21	9.91	13-1014 x [13-1014 (= C1805-617-1 x GA-06G) x BRD_C0010 [5-646-10 x [Runner 886 x (A. batizocoi K9484 x A. stenosperma V10309)4x] F2:7_Tifton_F3:5]_F1:3]
BC3F1	BC3F1_BRD_C0050_Seed9_S84	0.81	18.53	10.07	13-1014 x [13-1014 (= C1805-617-1 x GA-06G) x BRD_C0010 [5-646-10 x [Runner 886 x (A. batizocoi K9484 x A. stenosperma V10309)4x] F2:7_Tifton_F3:5]_F1:3]
BC3F1	BC3F1_BRD_C0050_Seed9_S33	0.63	15.84	8.77	13-1014 x [13-1014 (= C1805-617-1 x GA-06G) x BRD_C0010 [5-646-10 x [Runner 886 x (A. batizocoi K9484 x A. stenosperma V10309)4x] F2:7_Tifton_F3:5]_F1:3]
BC3F1	BC3F1_BRD_C0049_Seed7_S18	0.78	18.88	10.07	5-646-10 x [5-646-10 x BRD_C0010 [5-646-10 x [Runner 886 x (A. batizocoi K9484 x A. stenosperma V10309)4x] F2:7_Tifton_F3:5]_F1:3]
BC3F1	BC3F1_BRD_C0050_Seed9_S53	0.84	18.16	10.46	13-1014 x [13-1014 (= C1805-617-1 x GA-06G) x BRD_C0010 [5-646-10 x [Runner 886 x (A. batizocoi K9484 x A. stenosperma V10309)4x] F2:7_Tifton_F3:5]_F1:3]
BC3F1	BC3F1:C2633-2_3(16)_S28	0.68	15.78	10.47	5-646-10 x [ 5-646-10 x BC1F1:C2633-2_3 [5-646-10 x [Runner 886 x (A. batizocoi K9484 x A. stenosperma V10309)4x] F2:34_Tifton_F3:6]]
BC3F1	BC3F1:C2633-2_3(16)_S37	0.92	15.1	12	5-646-10 x [ 5-646-10 x BC1F1:C2633-2_3 [5-646-10 x [Runner 886 x (A. batizocoi K9484 x A. stenosperma V10309)4x] F2:34_Tifton_F3:6]]
BC3F1	BC3F1_BRD_C0050_Seed9_S13	0.61	15.28	8.77	13-1014 x [13-1014 (= C1805-617-1 x GA-06G) x BRD_C0010 [5-646-10 x [Runner 886 x (A. batizocoi K9484 x A. stenosperma V10309)4x] F2:7_Tifton_F3:5]_F1:3]
BC3F1	BC3F1_BRD_C0050_Seed9_S37	0.61	13.65	9.46	13-1014 x [13-1014 (= C1805-617-1 x GA-06G) x BRD_C0010 [5-646-10 x [Runner 886 x (A. batizocoi K9484 x A. stenosperma V10309)4x] F2:7_Tifton_F3:5]_F1:3]
BC3F1	BC3F1_BRD_C0050_Seed9_S66	0.79	18.24	10.48	13-1014 x [13-1014 (= C1805-617-1 x GA-06G) x BRD_C0010 [5-646-10 x [Runner 886 x (A. batizocoi K9484 x A. stenosperma V10309)4x] F2:7_Tifton_F3:5]_F1:3]
BC3F1	BC3F1:C2633-2_3(16)_S14	0.9	19.23	11.11	5-646-10 x [ 5-646-10 x BC1F1:C2633-2_3 [5-646-10 x [Runner 886 x (A. batizocoi K9484 x A. stenosperma V10309)4x] F2:34_Tifton_F3:6]]
BC3F1	BC3F1_RBS_sd20_S3	0.09	10.69	4.04	BRD_C0129=13-1014xBRD_C55[5-646-10 x BRD_C10 [5-646-10 x [ 886 x (A. bat K9484 x A. sten V10309)4x] F2:7_T_F3:5]_F1:6]
BC3F1	BC3F1_BRD_C0050_Seed9_S82	1.02	18.09	11.09	13-1014 x [13-1014 (= C1805-617-1 x GA-06G) x BRD_C0010 [5-646-10 x [Runner 886 x (A. batizocoi K9484 x A. stenosperma V10309)4x] F2:7_Tifton_F3:5]_F1:3]
BC3F1	BC3F1_BRD_C0050_Seed9_S80	0.45	10.95	9.5	13-1014 x [13-1014 (= C1805-617-1 x GA-06G) x BRD_C0010 [5-646-10 x [Runner 886 x (A. batizocoi K9484 x A. stenosperma V10309)4x] F2:7_Tifton_F3:5]_F1:3]
BC3F1	BC3F1_BRD_C0050_Seed9_S58	0.87	18	10.94	13-1014 x [13-1014 (= C1805-617-1 x GA-06G) x BRD_C0010 [5-646-10 x [Runner 886 x (A. batizocoi K9484 x A. stenosperma V10309)4x] F2:7_Tifton_F3:5]_F1:3]
BC3F1	BC3F1_BRD_C0050_Seed9_S69	0.73	16.29	10.73	13-1014 x [13-1014 (= C1805-617-1 x GA-06G) x BRD_C0010 [5-646-10 x [Runner 886 x (A. batizocoi K9484 x A. stenosperma V10309)4x] F2:7_Tifton_F3:5]_F1:3]
BC3F1	BC3F1:C2633-2_3(16)_S59	0.7	17.46	10.3	5-646-10 x [ 5-646-10 x BC1F1:C2633-2_3 [5-646-10 x [Runner 886 x (A. batizocoi K9484 x A. stenosperma V10309)4x] F2:34_Tifton_F3:6]]
BC3F1	BC3F1:C2633-2_3(16)_S56	0.57	14.45	9.72	5-646-10 x [ 5-646-10 x BC1F1:C2633-2_3 [5-646-10 x [Runner 886 x (A. batizocoi K9484 x A. stenosperma V10309)4x] F2:34_Tifton_F3:6]]
BC3F1	BC3F1:C2633-2_3(16)_S11	0.72	16.86	11.34	5-646-10 x [ 5-646-10 x BC1F1:C2633-2_3 [5-646-10 x [Runner 886 x (A. batizocoi K9484 x A. stenosperma V10309)4x] F2:34_Tifton_F3:6]]
BC3F1	BC3F1_RBS_sd26_S4	0.77	15.38	10.05	BRD_C0111=5-646-10xBRD_C56[13-1014 x BRD_C10 [5-646-10 x [ 886 x (A. bat K9484 x A. sten V10309)4x] F2:7_T_F3:5]_F1:6]
BC3F1	BC3F1_BRD_C0050_Seed9_S15	0.78	15.34	10.31	13-1014 x [13-1014 (= C1805-617-1 x GA-06G) x BRD_C0010 [5-646-10 x [Runner 886 x (A. batizocoi K9484 x A. stenosperma V10309)4x] F2:7_Tifton_F3:5]_F1:3]
BC3F1	BC3F1_RBS_sd14_S7	0.33	12.29	6.93	BRD_C0115=5-646-10xBRD_C55[5-646-10 x BRD_C10 [5-646-10 x [ 886 x (A. bat K9484 x A. sten V10309)4x] F2:7_T_F3:5]_F1:6]
BC3F1	BC3F1_RBS_sd26_S2	0.72	14.29	10.83	BRD_C0111=5-646-10xBRD_C56[13-1014 x BRD_C10 [5-646-10 x [ 886 x (A. bat K9484 x A. sten V10309)4x] F2:7_T_F3:5]_F1:6]
BC3F1	BC3F1_RBS_sd4_S1	0.54	15.38	8.41	BRD_C0126=13-1014xBRD_C49[5-646-10 x BRD_C10 [5-646-10 x [ 886 x (A. bat K9484 x A. sten V10309)4x] F2:7_T_F3:5]_F1:3]
BC3F1	BC3F1_BRD_C0050_Seed9_S23	0.7	16.96	9.67	13-1014 x [13-1014 (= C1805-617-1 x GA-06G) x BRD_C0010 [5-646-10 x [Runner 886 x (A. batizocoi K9484 x A. stenosperma V10309)4x] F2:7_Tifton_F3:5]_F1:3]
BC3F1	BC3F1:C2633-2_3(16)_S27	0.73	18.73	8.95	5-646-10 x [ 5-646-10 x BC1F1:C2633-2_3 [5-646-10 x [Runner 886 x (A. batizocoi K9484 x A. stenosperma V10309)4x] F2:34_Tifton_F3:6]]
BC3F1	BC3F1_RBS_sd26_S9	0.39	14.08	7.26	BRD_C0111=5-646-10xBRD_C56[13-1014 x BRD_C10 [5-646-10 x [ 886 x (A. bat K9484 x A. sten V10309)4x] F2:7_T_F3:5]_F1:6]
BC3F1	BC3F1_RBS_sd14_S3	0.41	14.42	7.27	BRD_C0115=5-646-10xBRD_C55[5-646-10 x BRD_C10 [5-646-10 x [ 886 x (A. bat K9484 x A. sten V10309)4x] F2:7_T_F3:5]_F1:6]
BC3F1	BC3F1_RBS_sd11_S4	0.57	17.05	7.72	BRD_C0109=5-646-10xBRD_C50[13-1014 x BRD_C10 [5-646-10 x [ 886 x (A. bat K9484 x A. sten V10309)4x] F2:7_T_F3:5]_F1:3]
BC3F1	BC3F1_BRD_C0050_Seed9_S17	0.65	15.95	9.06	13-1014 x [13-1014 (= C1805-617-1 x GA-06G) x BRD_C0010 [5-646-10 x [Runner 886 x (A. batizocoi K9484 x A. stenosperma V10309)4x] F2:7_Tifton_F3:5]_F1:3]
BC3F1	BC3F1_BRD_C0050_Seed9_S26	0.28	10.98	8.36	13-1014 x [13-1014 (= C1805-617-1 x GA-06G) x BRD_C0010 [5-646-10 x [Runner 886 x (A. batizocoi K9484 x A. stenosperma V10309)4x] F2:7_Tifton_F3:5]_F1:3]
BC3F1	BC3F1_BRD_C0050_Seed9_S36	0.3	11.94	7.14	13-1014 x [13-1014 (= C1805-617-1 x GA-06G) x BRD_C0010 [5-646-10 x [Runner 886 x (A. batizocoi K9484 x A. stenosperma V10309)4x] F2:7_Tifton_F3:5]_F1:3]
BC3F1	BC3F1:C2633-2_3(16)_S62	0.58	14.39	9.68	5-646-10 x [ 5-646-10 x BC1F1:C2633-2_3 [5-646-10 x [Runner 886 x (A. batizocoi K9484 x A. stenosperma V10309)4x] F2:34_Tifton_F3:6]]
BC3F1	BC3F1_BRD_C0049_Seed1_S10	0.92	18.87	9.85	5-646-10 x [ 5-646-10 x BRD_C0010 [5-646-10 x [Runner 886 x (A. batizocoi K9484 x A. stenosperma V10309)4x] F2:7_Tifton_F3:5]_F1:3]
BC3F1	BC3F1_BRD_C0050_Seed9_S14	0.58	15.72	8.72	13-1014 x [13-1014 (= C1805-617-1 x GA-06G) x BRD_C0010 [5-646-10 x [Runner 886 x (A. batizocoi K9484 x A. stenosperma V10309)4x] F2:7_Tifton_F3:5]_F1:3]
BC3F1	BC3F1_BRD_C0050_Seed9_S42	0.7	16.02	9.94	13-1014 x [13-1014 (= C1805-617-1 x GA-06G) x BRD_C0010 [5-646-10 x [Runner 886 x (A. batizocoi K9484 x A. stenosperma V10309)4x] F2:7_Tifton_F3:5]_F1:3]
BC3F1	BC3F1_BRD_C0050_Seed9_S34	0.46	13.05	8.96	13-1014 x [13-1014 (= C1805-617-1 x GA-06G) x BRD_C0010 [5-646-10 x [Runner 886 x (A. batizocoi K9484 x A. stenosperma V10309)4x] F2:7_Tifton_F3:5]_F1:3]
BC3F1	BC3F1_BRD_C0050_Seed9_S85	0.81	15.11	10.86	13-1014 x [13-1014 (= C1805-617-1 x GA-06G) x BRD_C0010 [5-646-10 x [Runner 886 x (A. batizocoi K9484 x A. stenosperma V10309)4x] F2:7_Tifton_F3:5]_F1:3]
BC3F1	BC3F1_BRD_C0050_Seed9_S52	0.34	12.29	7.29	13-1014 x [13-1014 (= C1805-617-1 x GA-06G) x BRD_C0010 [5-646-10 x [Runner 886 x (A. batizocoi K9484 x A. stenosperma V10309)4x] F2:7_Tifton_F3:5]_F1:3]
BC3F1	BC3F1_BRD_C0050_Seed9_S59	0.79	16.91	11.23	13-1014 x [13-1014 (= C1805-617-1 x GA-06G) x BRD_C0010 [5-646-10 x [Runner 886 x (A. batizocoi K9484 x A. stenosperma V10309)4x] F2:7_Tifton_F3:5]_F1:3]
BC3F1	BC3F1_BRD_C0050_Seed9_S62	0.79	16.8	11.02	13-1014 x [13-1014 (= C1805-617-1 x GA-06G) x BRD_C0010 [5-646-10 x [Runner 886 x (A. batizocoi K9484 x A. stenosperma V10309)4x] F2:7_Tifton_F3:5]_F1:3]
BC3F1	BC3F1_RBS_sd34_S8	0.71	14.41	11.65	BRD_C0113=5-646-10xBRD_C58[13-2113x BRD_C10 [5-646-10 x [ 886 x (A. bat K9484 x A. sten V10309)4x] F2:7_T_F3:5]_F1:7]
BC3F1	BC3F1:C2633-2_3(16)_S2	0.64	14.7	10.46	5-646-10 x [ 5-646-10 x BC1F1:C2633-2_3 [5-646-10 x [Runner 886 x (A. batizocoi K9484 x A. stenosperma V10309)4x] F2:34_Tifton_F3:6]]
BC3F1	BC3F1_BRD_C0050_Seed9_S22	0.81	16.51	10.24	13-1014 x [13-1014 (= C1805-617-1 x GA-06G) x BRD_C0010 [5-646-10 x [Runner 886 x (A. batizocoi K9484 x A. stenosperma V10309)4x] F2:7_Tifton_F3:5]_F1:3]
BC3F1	BC3F1_BRD_C0050_Seed9_S77	0.6	15.59	9.36	13-1014 x [13-1014 (= C1805-617-1 x GA-06G) x BRD_C0010 [5-646-10 x [Runner 886 x (A. batizocoi K9484 x A. stenosperma V10309)4x] F2:7_Tifton_F3:5]_F1:3]
BC3F1	BC3F1_RBS_sd14_S13	0.16	11.4	3.71	BRD_C0115=5-646-10xBRD_C55[5-646-10 x BRD_C10 [5-646-10 x [ 886 x (A. bat K9484 x A. sten V10309)4x] F2:7_T_F3:5]_F1:6]
BC3F1	BC3F1_RBS_sd26_S6	0.74	15.32	10.5	BRD_C0111=5-646-10xBRD_C56[13-1014 x BRD_C10 [5-646-10 x [ 886 x (A. bat K9484 x A. sten V10309)4x] F2:7_T_F3:5]_F1:6]
BC3F1	BC3F1_BRD_C0050_Seed9_S63	0.72	16.16	10.64	13-1014 x [13-1014 (= C1805-617-1 x GA-06G) x BRD_C0010 [5-646-10 x [Runner 886 x (A. batizocoi K9484 x A. stenosperma V10309)4x] F2:7_Tifton_F3:5]_F1:3]
BC3F1	BC3F1_BRD_C0050_Seed9_S3	0.75	15.52	10.34	13-1014 x [13-1014 (= C1805-617-1 x GA-06G) x BRD_C0010 [5-646-10 x [Runner 886 x (A. batizocoi K9484 x A. stenosperma V10309)4x] F2:7_Tifton_F3:5]_F1:3]
BC3F1	BC3F1_RBS_sd14_S8	0.35	14.71	5.76	BRD_C0115=5-646-10xBRD_C55[5-646-10 x BRD_C10 [5-646-10 x [ 886 x (A. bat K9484 x A. sten V10309)4x] F2:7_T_F3:5]_F1:6]
BC3F1	BC3F1_BRD_C0050_Seed9_S18	0.5	13.65	10.07	13-1014 x [13-1014 (= C1805-617-1 x GA-06G) x BRD_C0010 [5-646-10 x [Runner 886 x (A. batizocoi K9484 x A. stenosperma V10309)4x] F2:7_Tifton_F3:5]_F1:3]
BC3F1	BC3F1:C2633-2_3(16)_S43	0.89	16.71	11.59	5-646-10 x [ 5-646-10 x BC1F1:C2633-2_3 [5-646-10 x [Runner 886 x (A. batizocoi K9484 x A. stenosperma V10309)4x] F2:34_Tifton_F3:6]]
BC3F1	BC3F1_RBS_sd14_S4	0.39	13.74	6.8	BRD_C0115=5-646-10xBRD_C55[5-646-10 x BRD_C10 [5-646-10 x [ 886 x (A. bat K9484 x A. sten V10309)4x] F2:7_T_F3:5]_F1:6]
BC3F1	BC3F1_RBS_sd14_S6	0.38	12.81	6.85	BRD_C0115=5-646-10xBRD_C55[5-646-10 x BRD_C10 [5-646-10 x [ 886 x (A. bat K9484 x A. sten V10309)4x] F2:7_T_F3:5]_F1:6]
BC3F1	BC3F1_BRD_C0050_Seed9_S38	0.65	16.61	9.22	13-1014 x [13-1014 (= C1805-617-1 x GA-06G) x BRD_C0010 [5-646-10 x [Runner 886 x (A. batizocoi K9484 x A. stenosperma V10309)4x] F2:7_Tifton_F3:5]_F1:3]
BC3F1	BC3F1_BRD_C0050_Seed9_S56	0.72	16.12	10.64	13-1014 x [13-1014 (= C1805-617-1 x GA-06G) x BRD_C0010 [5-646-10 x [Runner 886 x (A. batizocoi K9484 x A. stenosperma V10309)4x] F2:7_Tifton_F3:5]_F1:3]
BC3F1	BC3F1_BRD_C0049_Seed8_S15	1.26	18.69	13.42	5-646-10 x [5-646-10 x BRD_C0010 [5-646-10 x [Runner 886 x (A. batizocoi K9484 x A. stenosperma V10309)4x] F2:7_Tifton_F3:5]_F1:3]
BC3F1	BC3F1_RBS_sd34_S1	1.01	16.94	12.12	BRD_C0113=5-646-10xBRD_C58[13-2113x BRD_C10 [5-646-10 x [ 886 x (A. bat K9484 x A. sten V10309)4x] F2:7_T_F3:5]_F1:7]
BC3F1	BC3F1_BRD_C0049_Seed1_S15	1.06	20.23	9.7	5-646-10 x [ 5-646-10 x BRD_C0010 [5-646-10 x [Runner 886 x (A. batizocoi K9484 x A. stenosperma V10309)4x] F2:7_Tifton_F3:5]_F1:3]
BC3F1	BC3F1:C2633-2_3(16)_S69	0.34	13.62	6.34	5-646-10 x [ 5-646-10 x BC1F1:C2633-2_3 [5-646-10 x [Runner 886 x (A. batizocoi K9484 x A. stenosperma V10309)4x] F2:34_Tifton_F3:6]]
BC3F1	BC3F1:C2633-2_3(16)_S20	1.02	17.69	12.13	5-646-10 x [ 5-646-10 x BC1F1:C2633-2_3 [5-646-10 x [Runner 886 x (A. batizocoi K9484 x A. stenosperma V10309)4x] F2:34_Tifton_F3:6]]
BC3F1	BC3F1_BRD_C0050_Seed9_S24	0.53	14.31	9.69	13-1014 x [13-1014 (= C1805-617-1 x GA-06G) x BRD_C0010 [5-646-10 x [Runner 886 x (A. batizocoi K9484 x A. stenosperma V10309)4x] F2:7_Tifton_F3:5]_F1:3]
BC3F1	BC3F1_BRD_C0050_Seed9_S4	0.62	16.55	8.35	13-1014 x [13-1014 (= C1805-617-1 x GA-06G) x BRD_C0010 [5-646-10 x [Runner 886 x (A. batizocoi K9484 x A. stenosperma V10309)4x] F2:7_Tifton_F3:5]_F1:3]
BC3F1	BC3F1_BRD_C0050_Seed9_S70	0.68	15.93	9.87	13-1014 x [13-1014 (= C1805-617-1 x GA-06G) x BRD_C0010 [5-646-10 x [Runner 886 x (A. batizocoi K9484 x A. stenosperma V10309)4x] F2:7_Tifton_F3:5]_F1:3]
BC3F1	BC3F1:C2633-2_3(16)_S3	0.67	15.24	10.4	5-646-10 x [ 5-646-10 x BC1F1:C2633-2_3 [5-646-10 x [Runner 886 x (A. batizocoi K9484 x A. stenosperma V10309)4x] F2:34_Tifton_F3:6]]
BC3F1	BC3F1_RBS_sd34_S5	0.54	12.15	10.91	BRD_C0113=5-646-10xBRD_C58[13-2113x BRD_C10 [5-646-10 x [ 886 x (A. bat K9484 x A. sten V10309)4x] F2:7_T_F3:5]_F1:7]
BC3F1	BC3F1_RBS_sd13_S16	0.16	11.86	4.7	BRD_C0110=5-646-10xBRD_C52[13-2113x BRD_C10 [5-646-10 x [ 886 x (A. bat K9484 x A. sten V10309)4x] F2:7_T_F3:5]_F1:4]
BC3F1	BC3F1_RBS_sd4_S4	0.3	11.76	7.23	BRD_C0126=13-1014xBRD_C49[5-646-10 x BRD_C10 [5-646-10 x [ 886 x (A. bat K9484 x A. sten V10309)4x] F2:7_T_F3:5]_F1:3]
BC3F1	BC3F1_RBS_sd11_S15	0.11	10.25	5.14	BRD_C0109=5-646-10xBRD_C50[13-1014 x BRD_C10 [5-646-10 x [ 886 x (A. bat K9484 x A. sten V10309)4x] F2:7_T_F3:5]_F1:3]
BC3F1	BC3F1_BRD_C0050_Seed9_S49	0.89	19.54	10.9	13-1014 x [13-1014 (= C1805-617-1 x GA-06G) x BRD_C0010 [5-646-10 x [Runner 886 x (A. batizocoi K9484 x A. stenosperma V10309)4x] F2:7_Tifton_F3:5]_F1:3]
BC3F1	BC3F1:C2633-2_3(16)_S61	0.64	15.57	8.88	5-646-10 x [ 5-646-10 x BC1F1:C2633-2_3 [5-646-10 x [Runner 886 x (A. batizocoi K9484 x A. stenosperma V10309)4x] F2:34_Tifton_F3:6]]
BC3F1	BC3F1_BRD_C0050_Seed9_S35	0.53	14.8	8.69	13-1014 x [13-1014 (= C1805-617-1 x GA-06G) x BRD_C0010 [5-646-10 x [Runner 886 x (A. batizocoi K9484 x A. stenosperma V10309)4x] F2:7_Tifton_F3:5]_F1:3]
BC3F1	BC3F1:C2633-2_3(16)_S7	0.74	16	10.39	5-646-10 x [ 5-646-10 x BC1F1:C2633-2_3 [5-646-10 x [Runner 886 x (A. batizocoi K9484 x A. stenosperma V10309)4x] F2:34_Tifton_F3:6]]
BC3F1	BC3F1_BRD_C0050_Seed9_S81	0.67	15.36	10.62	13-1014 x [13-1014 (= C1805-617-1 x GA-06G) x BRD_C0010 [5-646-10 x [Runner 886 x (A. batizocoi K9484 x A. stenosperma V10309)4x] F2:7_Tifton_F3:5]_F1:3]
BC3F1	BC3F1_BRD_C0049_Seed2_S6	0.7	16.1	10.54	5-646-10 x [ 5-646-10 x BRD_C0010 [5-646-10 x [Runner 886 x (A. batizocoi K9484 x A. stenosperma V10309)4x] F2:7_Tifton_F3:5]_F1:3]
BC3F1	BC3F1_BRD_C0049_Seed1_S4	1.07	17.79	10.82	5-646-10 x [ 5-646-10 x BRD_C0010 [5-646-10 x [Runner 886 x (A. batizocoi K9484 x A. stenosperma V10309)4x] F2:7_Tifton_F3:5]_F1:3]
BC3F1	BC3F1:C2633-2_3(16)_S6	0.79	18.24	9.74	5-646-10 x [ 5-646-10 x BC1F1:C2633-2_3 [5-646-10 x [Runner 886 x (A. batizocoi K9484 x A. stenosperma V10309)4x] F2:34_Tifton_F3:6]]
BC3F1	BC3F1_RBS_sd11_S12	0.44	14.59	7.27	BRD_C0109=5-646-10xBRD_C50[13-1014 x BRD_C10 [5-646-10 x [ 886 x (A. bat K9484 x A. sten V10309)4x] F2:7_T_F3:5]_F1:3]
BC3F1	BC3F1_RBS_sd26_S10	0.3	13.34	6.04	BRD_C0111=5-646-10xBRD_C56[13-1014 x BRD_C10 [5-646-10 x [ 886 x (A. bat K9484 x A. sten V10309)4x] F2:7_T_F3:5]_F1:6]
BC3F1	BC3F1_BRD_C0049_Seed8_S17	0.73	14.34	11.4	5-646-10 x [5-646-10 x BRD_C0010 [5-646-10 x [Runner 886 x (A. batizocoi K9484 x A. stenosperma V10309)4x] F2:7_Tifton_F3:5]_F1:3]
BC3F1	BC3F1_BRD_C0050_Seed9_S6	0.8	15.6	10.9	13-1014 x [13-1014 (= C1805-617-1 x GA-06G) x BRD_C0010 [5-646-10 x [Runner 886 x (A. batizocoi K9484 x A. stenosperma V10309)4x] F2:7_Tifton_F3:5]_F1:3]
BC3F1	BC3F1_RBS_sd11_S11	0.5	15.3	7.73	BRD_C0109=5-646-10xBRD_C50[13-1014 x BRD_C10 [5-646-10 x [ 886 x (A. bat K9484 x A. sten V10309)4x] F2:7_T_F3:5]_F1:3]
BC3F1	BC3F1:C2633-2_3(16)_S57	0.6	16.83	9.25	5-646-10 x [ 5-646-10 x BC1F1:C2633-2_3 [5-646-10 x [Runner 886 x (A. batizocoi K9484 x A. stenosperma V10309)4x] F2:34_Tifton_F3:6]]
BC3F1	BC3F1:C2633-2_3(16)_S1	0.77	16.83	10.54	5-646-10 x [ 5-646-10 x BC1F1:C2633-2_3 [5-646-10 x [Runner 886 x (A. batizocoi K9484 x A. stenosperma V10309)4x] F2:34_Tifton_F3:6]]
BC3F1	BC3F1_RBS_sd11_S6	0.48	12.93	7.99	BRD_C0109=5-646-10xBRD_C50[13-1014 x BRD_C10 [5-646-10 x [ 886 x (A. bat K9484 x A. sten V10309)4x] F2:7_T_F3:5]_F1:3]
BC3F1	BC3F1_BRD_C0050_Seed9_S31	0.66	15.73	9.48	13-1014 x [13-1014 (= C1805-617-1 x GA-06G) x BRD_C0010 [5-646-10 x [Runner 886 x (A. batizocoi K9484 x A. stenosperma V10309)4x] F2:7_Tifton_F3:5]_F1:3]
BC3F1	BC3F1_BRD_C0049_Seed2_S1	0.78	15.27	10.81	5-646-10 x [ 5-646-10 x BRD_C0010 [5-646-10 x [Runner 886 x (A. batizocoi K9484 x A. stenosperma V10309)4x] F2:7_Tifton_F3:5]_F1:3]
BC3F1	BC3F1_BRD_C0050_Seed9_S5	0.63	14.93	10	13-1014 x [13-1014 (= C1805-617-1 x GA-06G) x BRD_C0010 [5-646-10 x [Runner 886 x (A. batizocoi K9484 x A. stenosperma V10309)4x] F2:7_Tifton_F3:5]_F1:3]
BC3F1	BC3F1_RBS_sd26_S23	0.13	12.58	3.71	BRD_C0111=5-646-10xBRD_C56[13-1014 x BRD_C10 [5-646-10 x [ 886 x (A. bat K9484 x A. sten V10309)4x] F2:7_T_F3:5]_F1:6]
BC3F1	BC3F1:C2633-2_3(16)_S25	0.66	14.59	9.7	5-646-10 x [ 5-646-10 x BC1F1:C2633-2_3 [5-646-10 x [Runner 886 x (A. batizocoi K9484 x A. stenosperma V10309)4x] F2:34_Tifton_F3:6]]
BC3F1	BC3F1_RBS_sd26_S12	0.24	12.93	5.39	BRD_C0111=5-646-10xBRD_C56[13-1014 x BRD_C10 [5-646-10 x [ 886 x (A. bat K9484 x A. sten V10309)4x] F2:7_T_F3:5]_F1:6]
BC3F1	BC3F1:C2633-2_3(16)_S66	0.65	16.13	9.88	5-646-10 x [ 5-646-10 x BC1F1:C2633-2_3 [5-646-10 x [Runner 886 x (A. batizocoi K9484 x A. stenosperma V10309)4x] F2:34_Tifton_F3:6]]
BC3F1	BC3F1_BRD_C0049_Seed2_S5	0.71	17.06	11.13	5-646-10 x [ 5-646-10 x BRD_C0010 [5-646-10 x [Runner 886 x (A. batizocoi K9484 x A. stenosperma V10309)4x] F2:7_Tifton_F3:5]_F1:3]
BC3F1	BC3F1:C2633-2_3(16)_S54	0.6	16.65	9.46	5-646-10 x [ 5-646-10 x BC1F1:C2633-2_3 [5-646-10 x [Runner 886 x (A. batizocoi K9484 x A. stenosperma V10309)4x] F2:34_Tifton_F3:6]]
BC3F1	BC3F1_RBS_sd11_S3	0.53	13.94	8.76	BRD_C0109=5-646-10xBRD_C50[13-1014 x BRD_C10 [5-646-10 x [ 886 x (A. bat K9484 x A. sten V10309)4x] F2:7_T_F3:5]_F1:3]
BC3F1	BC3F1_RBS_sd27_S3	0.2	13.76	5.08	BRD_C0128=13-1014xBRD_C56[13-1014 x BRD_C10 [5-646-10 x [ 886 x (A. bat K9484 x A. sten V10309)4x] F2:7_T_F3:5]_F1:6]
BC3F1	BC3F1:C2633-2_3(16)_S22	0.69	17.56	9.51	5-646-10 x [ 5-646-10 x BC1F1:C2633-2_3 [5-646-10 x [Runner 886 x (A. batizocoi K9484 x A. stenosperma V10309)4x] F2:34_Tifton_F3:6]]
BC3F1	BC3F1:C2633-2_3(16)_S4	0.83	18.01	10.27	5-646-10 x [ 5-646-10 x BC1F1:C2633-2_3 [5-646-10 x [Runner 886 x (A. batizocoi K9484 x A. stenosperma V10309)4x] F2:34_Tifton_F3:6]]
BC3F1	BC3F1_BRD_C0049_Seed1_S21	1.12	18.08	12.35	5-646-10 x [ 5-646-10 x BRD_C0010 [5-646-10 x [Runner 886 x (A. batizocoi K9484 x A. stenosperma V10309)4x] F2:7_Tifton_F3:5]_F1:3]
BC3F1	BC3F1_BRD_C0050_Seed9_S64	0.73	18.52	10.52	13-1014 x [13-1014 (= C1805-617-1 x GA-06G) x BRD_C0010 [5-646-10 x [Runner 886 x (A. batizocoi K9484 x A. stenosperma V10309)4x] F2:7_Tifton_F3:5]_F1:3]
BC3F1	BC3F1_BRD_C0049_Seed8_S12	1.01	17.79	12.62	5-646-10 x [5-646-10 x BRD_C0010 [5-646-10 x [Runner 886 x (A. batizocoi K9484 x A. stenosperma V10309)4x] F2:7_Tifton_F3:5]_F1:3]
BC3F1	BC3F1_BRD_C0049_Seed1_S18	0.96	17.34	11.84	5-646-10 x [ 5-646-10 x BRD_C0010 [5-646-10 x [Runner 886 x (A. batizocoi K9484 x A. stenosperma V10309)4x] F2:7_Tifton_F3:5]_F1:3]
BC3F1	BC3F1_BRD_C0050_Seed9_S54	0.64	14.51	9.99	13-1014 x [13-1014 (= C1805-617-1 x GA-06G) x BRD_C0010 [5-646-10 x [Runner 886 x (A. batizocoi K9484 x A. stenosperma V10309)4x] F2:7_Tifton_F3:5]_F1:3]
BC3F1	BC3F1:C2633-2_3(16)_S63	0.3	11.64	5.94	5-646-10 x [ 5-646-10 x BC1F1:C2633-2_3 [5-646-10 x [Runner 886 x (A. batizocoi K9484 x A. stenosperma V10309)4x] F2:34_Tifton_F3:6]]
BC3F1	BC3F1:C2633-2_3(16)_S12	0.76	19.82	8.04	5-646-10 x [ 5-646-10 x BC1F1:C2633-2_3 [5-646-10 x [Runner 886 x (A. batizocoi K9484 x A. stenosperma V10309)4x] F2:34_Tifton_F3:6]]
BC3F1	BC3F1_RBS_sd26_S19	0.18	12.83	4.75	BRD_C0111=5-646-10xBRD_C56[13-1014 x BRD_C10 [5-646-10 x [ 886 x (A. bat K9484 x A. sten V10309)4x] F2:7_T_F3:5]_F1:6]
BC3F1	BC3F1_BRD_C0049_Seed7_S4	0.77	19.05	9.76	5-646-10 x [5-646-10 x BRD_C0010 [5-646-10 x [Runner 886 x (A. batizocoi K9484 x A. stenosperma V10309)4x] F2:7_Tifton_F3:5]_F1:3]
BC3F1	BC3F1:C2633-2_3(16)_S64	0.47	13.56	8.93	5-646-10 x [ 5-646-10 x BC1F1:C2633-2_3 [5-646-10 x [Runner 886 x (A. batizocoi K9484 x A. stenosperma V10309)4x] F2:34_Tifton_F3:6]]
BC3F1	BC3F1_BRD_C0049_Seed1_S6	1.09	18.54	11.55	5-646-10 x [ 5-646-10 x BRD_C0010 [5-646-10 x [Runner 886 x (A. batizocoi K9484 x A. stenosperma V10309)4x] F2:7_Tifton_F3:5]_F1:3]
BC3F1	BC3F1_RBS_sd26_S5	0.64	14.82	10.35	BRD_C0111=5-646-10xBRD_C56[13-1014 x BRD_C10 [5-646-10 x [ 886 x (A. bat K9484 x A. sten V10309)4x] F2:7_T_F3:5]_F1:6]
BC3F1	BC3F1_RBS_sd26_S8	0.61	16.43	8.88	BRD_C0111=5-646-10xBRD_C56[13-1014 x BRD_C10 [5-646-10 x [ 886 x (A. bat K9484 x A. sten V10309)4x] F2:7_T_F3:5]_F1:6]
BC3F1	BC3F1_BRD_C0049_Seed1_S20	0.71	17.93	9.16	5-646-10 x [ 5-646-10 x BRD_C0010 [5-646-10 x [Runner 886 x (A. batizocoi K9484 x A. stenosperma V10309)4x] F2:7_Tifton_F3:5]_F1:3]
BC3F1	BC3F1:C2633-2_3(16)_S51	0.51	16.76	8.67	5-646-10 x [ 5-646-10 x BC1F1:C2633-2_3 [5-646-10 x [Runner 886 x (A. batizocoi K9484 x A. stenosperma V10309)4x] F2:34_Tifton_F3:6]]
BC3F1	BC3F1_BRD_C0050_Seed9_S65	0.86	16.88	11.45	13-1014 x [13-1014 (= C1805-617-1 x GA-06G) x BRD_C0010 [5-646-10 x [Runner 886 x (A. batizocoi K9484 x A. stenosperma V10309)4x] F2:7_Tifton_F3:5]_F1:3]
BC3F1	BC3F1_RBS_sd26_S18	0.17	11.69	6.12	BRD_C0111=5-646-10xBRD_C56[13-1014 x BRD_C10 [5-646-10 x [ 886 x (A. bat K9484 x A. sten V10309)4x] F2:7_T_F3:5]_F1:6]
BC3F1	BC3F1_BRD_C0050_Seed9_S72	0.73	16.32	10.46	13-1014 x [13-1014 (= C1805-617-1 x GA-06G) x BRD_C0010 [5-646-10 x [Runner 886 x (A. batizocoi K9484 x A. stenosperma V10309)4x] F2:7_Tifton_F3:5]_F1:3]
BC3F1	BC3F1:C2633-2_3(16)_S40	1.22	18.99	11.82	5-646-10 x [ 5-646-10 x BC1F1:C2633-2_3 [5-646-10 x [Runner 886 x (A. batizocoi K9484 x A. stenosperma V10309)4x] F2:34_Tifton_F3:6]]
BC3F1	BC3F1_BRD_C0050_Seed9_S21	0.6	14.12	10.7	13-1014 x [13-1014 (= C1805-617-1 x GA-06G) x BRD_C0010 [5-646-10 x [Runner 886 x (A. batizocoi K9484 x A. stenosperma V10309)4x] F2:7_Tifton_F3:5]_F1:3]
BC3F1	BC3F1_BRD_C0049_Seed2_S4	0.79	17.85	10.74	5-646-10 x [ 5-646-10 x BRD_C0010 [5-646-10 x [Runner 886 x (A. batizocoi K9484 x A. stenosperma V10309)4x] F2:7_Tifton_F3:5]_F1:3]
BC3F1	BC3F1:C2633-2_3(16)_S53	0.61	15.52	9.87	5-646-10 x [ 5-646-10 x BC1F1:C2633-2_3 [5-646-10 x [Runner 886 x (A. batizocoi K9484 x A. stenosperma V10309)4x] F2:34_Tifton_F3:6]]
BC3F1	BC3F1_RBS_sd13_S15	0.2	13.83	4.97	BRD_C0110=5-646-10xBRD_C52[13-2113x BRD_C10 [5-646-10 x [ 886 x (A. bat K9484 x A. sten V10309)4x] F2:7_T_F3:5]_F1:4]
BC3F1	BC3F1_RBS_sd34_S7	0.58	14.4	10.57	BRD_C0113=5-646-10xBRD_C58[13-2113x BRD_C10 [5-646-10 x [ 886 x (A. bat K9484 x A. sten V10309)4x] F2:7_T_F3:5]_F1:7]
BC3F1	BC3F1_BRD_C0050_Seed9_S16	0.58	14.55	9.46	13-1014 x [13-1014 (= C1805-617-1 x GA-06G) x BRD_C0010 [5-646-10 x [Runner 886 x (A. batizocoi K9484 x A. stenosperma V10309)4x] F2:7_Tifton_F3:5]_F1:3]
BC3F1	BC3F1_BRD_C0050_Seed9_S55	0.7	16.14	10.7	13-1014 x [13-1014 (= C1805-617-1 x GA-06G) x BRD_C0010 [5-646-10 x [Runner 886 x (A. batizocoi K9484 x A. stenosperma V10309)4x] F2:7_Tifton_F3:5]_F1:3]
BC3F1	BC3F1_RBS_sd26_S24	0.15	10.34	5.41	BRD_C0111=5-646-10xBRD_C56[13-1014 x BRD_C10 [5-646-10 x [ 886 x (A. bat K9484 x A. sten V10309)4x] F2:7_T_F3:5]_F1:6]
BC3F1	BC3F1_RBS_sd11_S8	0.47	13.91	8.17	BRD_C0109=5-646-10xBRD_C50[13-1014 x BRD_C10 [5-646-10 x [ 886 x (A. bat K9484 x A. sten V10309)4x] F2:7_T_F3:5]_F1:3]
BC3F1	BC3F1_BRD_C0050_Seed9_S48	1.03	18.49	11.79	13-1014 x [13-1014 (= C1805-617-1 x GA-06G) x BRD_C0010 [5-646-10 x [Runner 886 x (A. batizocoi K9484 x A. stenosperma V10309)4x] F2:7_Tifton_F3:5]_F1:3]
BC3F1	BC3F1_RBS_sd26_S13	0.3	15.11	4.84	BRD_C0111=5-646-10xBRD_C56[13-1014 x BRD_C10 [5-646-10 x [ 886 x (A. bat K9484 x A. sten V10309)4x] F2:7_T_F3:5]_F1:6]
BC3F1	BC3F1_BRD_C0049_Seed1_S17	0.95	19.5	9.84	5-646-10 x [ 5-646-10 x BRD_C0010 [5-646-10 x [Runner 886 x (A. batizocoi K9484 x A. stenosperma V10309)4x] F2:7_Tifton_F3:5]_F1:3]
BC3F1	BC3F1_BRD_C0049_Seed7_S3	0.83	16.76	11.23	5-646-10 x [5-646-10 x BRD_C0010 [5-646-10 x [Runner 886 x (A. batizocoi K9484 x A. stenosperma V10309)4x] F2:7_Tifton_F3:5]_F1:3]
BC3F1	BC3F1_BRD_C0049_Seed8_S10	0.76	18.28	10.07	5-646-10 x [5-646-10 x BRD_C0010 [5-646-10 x [Runner 886 x (A. batizocoi K9484 x A. stenosperma V10309)4x] F2:7_Tifton_F3:5]_F1:3]
BC3F1	BC3F1_RBS_sd34_S4	0.88	16.03	11.83	BRD_C0113=5-646-10xBRD_C58[13-2113x BRD_C10 [5-646-10 x [ 886 x (A. bat K9484 x A. sten V10309)4x] F2:7_T_F3:5]_F1:7]
BC3F1	BC3F1_RBS_sd26_S11	0.28	13.3	6.01	BRD_C0111=5-646-10xBRD_C56[13-1014 x BRD_C10 [5-646-10 x [ 886 x (A. bat K9484 x A. sten V10309)4x] F2:7_T_F3:5]_F1:6]
BC3F1	BC3F1_BRD_C0049_Seed1_S12	1.05	19.35	10.64	5-646-10 x [ 5-646-10 x BRD_C0010 [5-646-10 x [Runner 886 x (A. batizocoi K9484 x A. stenosperma V10309)4x] F2:7_Tifton_F3:5]_F1:3]
BC3F1	BC3F1_RBS_sd14_S1	0.42	13.34	8.09	BRD_C0115=5-646-10xBRD_C55[5-646-10 x BRD_C10 [5-646-10 x [ 886 x (A. bat K9484 x A. sten V10309)4x] F2:7_T_F3:5]_F1:6]
BC3F1	BC3F1:C2633-2_3(16)_S10	0.74	18.83	8.46	5-646-10 x [ 5-646-10 x BC1F1:C2633-2_3 [5-646-10 x [Runner 886 x (A. batizocoi K9484 x A. stenosperma V10309)4x] F2:34_Tifton_F3:6]]
BC3F1	BC3F1:C2633-2_3(16)_S42	1.11	18.48	12.41	5-646-10 x [ 5-646-10 x BC1F1:C2633-2_3 [5-646-10 x [Runner 886 x (A. batizocoi K9484 x A. stenosperma V10309)4x] F2:34_Tifton_F3:6]]
BC3F1	BC3F1_BRD_C0050_Seed9_S46	0.79	19.59	10.76	13-1014 x [13-1014 (= C1805-617-1 x GA-06G) x BRD_C0010 [5-646-10 x [Runner 886 x (A. batizocoi K9484 x A. stenosperma V10309)4x] F2:7_Tifton_F3:5]_F1:3]
BC3F1	BC3F1_RBS_sd26_S3	0.73	16.13	9.77	BRD_C0111=5-646-10xBRD_C56[13-1014 x BRD_C10 [5-646-10 x [ 886 x (A. bat K9484 x A. sten V10309)4x] F2:7_T_F3:5]_F1:6]
BC3F1	BC3F1_RBS_sd13_S9	0.42	13.66	7.55	BRD_C0110=5-646-10xBRD_C52[13-2113x BRD_C10 [5-646-10 x [ 886 x (A. bat K9484 x A. sten V10309)4x] F2:7_T_F3:5]_F1:4]
BC3F1	BC3F1_RBS_sd13_S4	0.86	13.71	12.34	BRD_C0110=5-646-10xBRD_C52[13-2113x BRD_C10 [5-646-10 x [ 886 x (A. bat K9484 x A. sten V10309)4x] F2:7_T_F3:5]_F1:4]
BC3F1	BC3F1:C2633-2_3(16)_S21	0.84	18.26	10.38	5-646-10 x [ 5-646-10 x BC1F1:C2633-2_3 [5-646-10 x [Runner 886 x (A. batizocoi K9484 x A. stenosperma V10309)4x] F2:34_Tifton_F3:6]]
BC3F1	BC3F1_RBS_sd13_S10	0.42	13.89	7.49	BRD_C0110=5-646-10xBRD_C52[13-2113x BRD_C10 [5-646-10 x [ 886 x (A. bat K9484 x A. sten V10309)4x] F2:7_T_F3:5]_F1:4]
BC3F1	BC3F1:C2633-2_3(16)_S67	0.54	15.63	9.22	5-646-10 x [ 5-646-10 x BC1F1:C2633-2_3 [5-646-10 x [Runner 886 x (A. batizocoi K9484 x A. stenosperma V10309)4x] F2:34_Tifton_F3:6]]
BC3F1	BC3F1:C2633-2_3(16)_S60	0.62	15.46	9.96	5-646-10 x [ 5-646-10 x BC1F1:C2633-2_3 [5-646-10 x [Runner 886 x (A. batizocoi K9484 x A. stenosperma V10309)4x] F2:34_Tifton_F3:6]]
BC3F1	BC3F1:C2633-2_3(16)_S23	0.74	16.08	10.89	5-646-10 x [ 5-646-10 x BC1F1:C2633-2_3 [5-646-10 x [Runner 886 x (A. batizocoi K9484 x A. stenosperma V10309)4x] F2:34_Tifton_F3:6]]
BC3F1	BC3F1_RBS_sd13_S7	0.52	16.51	7.33	BRD_C0110=5-646-10xBRD_C52[13-2113x BRD_C10 [5-646-10 x [ 886 x (A. bat K9484 x A. sten V10309)4x] F2:7_T_F3:5]_F1:4]
BC3F1	BC3F1_BRD_C0050_Seed9_S50	0.7	16.78	10.73	13-1014 x [13-1014 (= C1805-617-1 x GA-06G) x BRD_C0010 [5-646-10 x [Runner 886 x (A. batizocoi K9484 x A. stenosperma V10309)4x] F2:7_Tifton_F3:5]_F1:3]
BC3F1	BC3F1_BRD_C0049_Seed1_S8	0.91	17.25	11.43	5-646-10 x [ 5-646-10 x BRD_C0010 [5-646-10 x [Runner 886 x (A. batizocoi K9484 x A. stenosperma V10309)4x] F2:7_Tifton_F3:5]_F1:3]
BC3F1	BC3F1:C2633-2_3(16)_S15	0.67	15.42	9.64	5-646-10 x [ 5-646-10 x BC1F1:C2633-2_3 [5-646-10 x [Runner 886 x (A. batizocoi K9484 x A. stenosperma V10309)4x] F2:34_Tifton_F3:6]]
BC3F1	BC3F1_BRD_C0050_Seed9_S61	0.92	19.57	11.32	13-1014 x [13-1014 (= C1805-617-1 x GA-06G) x BRD_C0010 [5-646-10 x [Runner 886 x (A. batizocoi K9484 x A. stenosperma V10309)4x] F2:7_Tifton_F3:5]_F1:3]
BC3F1	BC3F1:C2633-2_3(16)_S50	0.56	15.13	9.49	5-646-10 x [ 5-646-10 x BC1F1:C2633-2_3 [5-646-10 x [Runner 886 x (A. batizocoi K9484 x A. stenosperma V10309)4x] F2:34_Tifton_F3:6]]
BC3F1	BC3F1_BRD_C0049_Seed7_S12	1.16	18.28	12.53	5-646-10 x [5-646-10 x BRD_C0010 [5-646-10 x [Runner 886 x (A. batizocoi K9484 x A. stenosperma V10309)4x] F2:7_Tifton_F3:5]_F1:3]
BC3F1	BC3F1_BRD_C0050_Seed9_S47	0.67	18.73	9.03	13-1014 x [13-1014 (= C1805-617-1 x GA-06G) x BRD_C0010 [5-646-10 x [Runner 886 x (A. batizocoi K9484 x A. stenosperma V10309)4x] F2:7_Tifton_F3:5]_F1:3]
BC3F1	BC3F1_BRD_C0050_Seed9_S51	0.4	12.47	8.11	13-1014 x [13-1014 (= C1805-617-1 x GA-06G) x BRD_C0010 [5-646-10 x [Runner 886 x (A. batizocoi K9484 x A. stenosperma V10309)4x] F2:7_Tifton_F3:5]_F1:3]
BC3F1	BC3F1_RBS_sd11_S2	0.63	15.3	8.65	BRD_C0109=5-646-10xBRD_C50[13-1014 x BRD_C10 [5-646-10 x [ 886 x (A. bat K9484 x A. sten V10309)4x] F2:7_T_F3:5]_F1:3]
BC3F1	BC3F1:C2633-2_3(16)_S35	0.86	19.91	8.72	5-646-10 x [ 5-646-10 x BC1F1:C2633-2_3 [5-646-10 x [Runner 886 x (A. batizocoi K9484 x A. stenosperma V10309)4x] F2:34_Tifton_F3:6]]
BC3F1	BC3F1_BRD_C0050_Seed9_S11	0.71	15.79	9.89	13-1014 x [13-1014 (= C1805-617-1 x GA-06G) x BRD_C0010 [5-646-10 x [Runner 886 x (A. batizocoi K9484 x A. stenosperma V10309)4x] F2:7_Tifton_F3:5]_F1:3]
BC3F1	BC3F1_BRD_C0050_Seed9_S75	0.76	15.89	10.23	13-1014 x [13-1014 (= C1805-617-1 x GA-06G) x BRD_C0010 [5-646-10 x [Runner 886 x (A. batizocoi K9484 x A. stenosperma V10309)4x] F2:7_Tifton_F3:5]_F1:3]
BC3F1	BC3F1:C2633-2_3(16)_S47	0.52	14.83	8.98	5-646-10 x [ 5-646-10 x BC1F1:C2633-2_3 [5-646-10 x [Runner 886 x (A. batizocoi K9484 x A. stenosperma V10309)4x] F2:34_Tifton_F3:6]]
BC3F1	BC3F1_BRD_C0050_Seed9_S45	0.75	17.03	11.01	13-1014 x [13-1014 (= C1805-617-1 x GA-06G) x BRD_C0010 [5-646-10 x [Runner 886 x (A. batizocoi K9484 x A. stenosperma V10309)4x] F2:7_Tifton_F3:5]_F1:3]
BC3F1	BC3F1_RBS_sd14_S2	0.47	15.48	7.43	BRD_C0115=5-646-10xBRD_C55[5-646-10 x BRD_C10 [5-646-10 x [ 886 x (A. bat K9484 x A. sten V10309)4x] F2:7_T_F3:5]_F1:6]
BC3F1	BC3F1:C2633-2_3(16)_S65	0.83	16.71	10.3	5-646-10 x [ 5-646-10 x BC1F1:C2633-2_3 [5-646-10 x [Runner 886 x (A. batizocoi K9484 x A. stenosperma V10309)4x] F2:34_Tifton_F3:6]]
BC3F1	BC3F1_BRD_C0049_Seed1_S11	0.91	16.88	10.93	5-646-10 x [ 5-646-10 x BRD_C0010 [5-646-10 x [Runner 886 x (A. batizocoi K9484 x A. stenosperma V10309)4x] F2:7_Tifton_F3:5]_F1:3]
BC3F1	BC3F1:C2633-2_3(16)_S29	0.55	13.6	9.85	5-646-10 x [ 5-646-10 x BC1F1:C2633-2_3 [5-646-10 x [Runner 886 x (A. batizocoi K9484 x A. stenosperma V10309)4x] F2:34_Tifton_F3:6]]
BC3F1	BC3F1_RBS_sd26_S22	0.13	11.36	4.06	BRD_C0111=5-646-10xBRD_C56[13-1014 x BRD_C10 [5-646-10 x [ 886 x (A. bat K9484 x A. sten V10309)4x] F2:7_T_F3:5]_F1:6]
BC3F1	BC3F1_BRD_C0050_Seed9_S67	1.09	18.32	13.06	13-1014 x [13-1014 (= C1805-617-1 x GA-06G) x BRD_C0010 [5-646-10 x [Runner 886 x (A. batizocoi K9484 x A. stenosperma V10309)4x] F2:7_Tifton_F3:5]_F1:3]
BC3F1	BC3F1:C2633-2_3(16)_S46	0.61	13.3	9.57	5-646-10 x [ 5-646-10 x BC1F1:C2633-2_3 [5-646-10 x [Runner 886 x (A. batizocoi K9484 x A. stenosperma V10309)4x] F2:34_Tifton_F3:6]]
BC3F1	BC3F1:C2633-2_3(16)_S30	0.88	17.96	9.7	5-646-10 x [ 5-646-10 x BC1F1:C2633-2_3 [5-646-10 x [Runner 886 x (A. batizocoi K9484 x A. stenosperma V10309)4x] F2:34_Tifton_F3:6]]
BC3F1	BC3F1:C2633-2_3(16)_S9	0.99	16.06	11.75	5-646-10 x [ 5-646-10 x BC1F1:C2633-2_3 [5-646-10 x [Runner 886 x (A. batizocoi K9484 x A. stenosperma V10309)4x] F2:34_Tifton_F3:6]]
BC3F1	BC3F1:C2633-2_3(16)_S18	0.68	15.8	10.46	5-646-10 x [ 5-646-10 x BC1F1:C2633-2_3 [5-646-10 x [Runner 886 x (A. batizocoi K9484 x A. stenosperma V10309)4x] F2:34_Tifton_F3:6]]
BC3F1	BC3F1_BRD_C0049_Seed1_S24	1.04	17.37	12.15	5-646-10 x [ 5-646-10 x BRD_C0010 [5-646-10 x [Runner 886 x (A. batizocoi K9484 x A. stenosperma V10309)4x] F2:7_Tifton_F3:5]_F1:3]
BC3F1	BC3F1_BRD_C0050_Seed9_S40	0.76	15.81	10.43	13-1014 x [13-1014 (= C1805-617-1 x GA-06G) x BRD_C0010 [5-646-10 x [Runner 886 x (A. batizocoi K9484 x A. stenosperma V10309)4x] F2:7_Tifton_F3:5]_F1:3]
BC3F1	BC3F1_BRD_C0050_Seed9_S32	0.52	13.91	9.51	13-1014 x [13-1014 (= C1805-617-1 x GA-06G) x BRD_C0010 [5-646-10 x [Runner 886 x (A. batizocoi K9484 x A. stenosperma V10309)4x] F2:7_Tifton_F3:5]_F1:3]
BC3F1	BC3F1_BRD_C0050_Seed9_S43	0.71	14.73	10.91	13-1014 x [13-1014 (= C1805-617-1 x GA-06G) x BRD_C0010 [5-646-10 x [Runner 886 x (A. batizocoi K9484 x A. stenosperma V10309)4x] F2:7_Tifton_F3:5]_F1:3]
BC3F1	BC3F1:C2633-2_3(16)_S8	1	18.6	11.18	5-646-10 x [ 5-646-10 x BC1F1:C2633-2_3 [5-646-10 x [Runner 886 x (A. batizocoi K9484 x A. stenosperma V10309)4x] F2:34_Tifton_F3:6]]
BC3F1	BC3F1_RBS_sd13_S5	0.6	13.02	10.99	BRD_C0110=5-646-10xBRD_C52[13-2113x BRD_C10 [5-646-10 x [ 886 x (A. bat K9484 x A. sten V10309)4x] F2:7_T_F3:5]_F1:4]
BC3F1	BC3F1:C2633-2_3(16)_S13	0.81	16.23	11.58	5-646-10 x [ 5-646-10 x BC1F1:C2633-2_3 [5-646-10 x [Runner 886 x (A. batizocoi K9484 x A. stenosperma V10309)4x] F2:34_Tifton_F3:6]]
BC3F1	BC3F1_BRD_C0049_Seed1_S14	1.01	19.47	10.7	5-646-10 x [ 5-646-10 x BRD_C0010 [5-646-10 x [Runner 886 x (A. batizocoi K9484 x A. stenosperma V10309)4x] F2:7_Tifton_F3:5]_F1:3]
BC3F1	BC3F1_BRD_C0050_Seed9_S39	0.49	13.45	9.21	13-1014 x [13-1014 (= C1805-617-1 x GA-06G) x BRD_C0010 [5-646-10 x [Runner 886 x (A. batizocoi K9484 x A. stenosperma V10309)4x] F2:7_Tifton_F3:5]_F1:3]
BC3F1	BC3F1_RBS_sd34_S6	0.56	16.13	9.14	BRD_C0113=5-646-10xBRD_C58[13-2113x BRD_C10 [5-646-10 x [ 886 x (A. bat K9484 x A. sten V10309)4x] F2:7_T_F3:5]_F1:7]
BC3F1	BC3F1:C2633-2_3(16)_S16	0.7	14.62	10.48	5-646-10 x [ 5-646-10 x BC1F1:C2633-2_3 [5-646-10 x [Runner 886 x (A. batizocoi K9484 x A. stenosperma V10309)4x] F2:34_Tifton_F3:6]]
BC3F1	BC3F1_BRD_C0049_Seed1_S23	1	17.84	11.27	5-646-10 x [ 5-646-10 x BRD_C0010 [5-646-10 x [Runner 886 x (A. batizocoi K9484 x A. stenosperma V10309)4x] F2:7_Tifton_F3:5]_F1:3]
BC3F1	BC3F1:C2633-2_3(16)_S39	0.97	17.13	11.12	5-646-10 x [ 5-646-10 x BC1F1:C2633-2_3 [5-646-10 x [Runner 886 x (A. batizocoi K9484 x A. stenosperma V10309)4x] F2:34_Tifton_F3:6]]
BC3F1	BC3F1:C2633-2_3(16)_S41	1.31	18.29	12.94	5-646-10 x [ 5-646-10 x BC1F1:C2633-2_3 [5-646-10 x [Runner 886 x (A. batizocoi K9484 x A. stenosperma V10309)4x] F2:34_Tifton_F3:6]]
BC3F1	BC3F1_BRD_C0050_Seed9_S60	0.84	19.27	11.23	13-1014 x [13-1014 (= C1805-617-1 x GA-06G) x BRD_C0010 [5-646-10 x [Runner 886 x (A. batizocoi K9484 x A. stenosperma V10309)4x] F2:7_Tifton_F3:5]_F1:3]
BC3F1	BC3F1_BRD_C0050_Seed9_S76	0.55	14.09	9.63	13-1014 x [13-1014 (= C1805-617-1 x GA-06G) x BRD_C0010 [5-646-10 x [Runner 886 x (A. batizocoi K9484 x A. stenosperma V10309)4x] F2:7_Tifton_F3:5]_F1:3]
BC3F1	BC3F1_BRD_C0050_Seed9_S83	0.74	16.86	9.71	13-1014 x [13-1014 (= C1805-617-1 x GA-06G) x BRD_C0010 [5-646-10 x [Runner 886 x (A. batizocoi K9484 x A. stenosperma V10309)4x] F2:7_Tifton_F3:5]_F1:3]
BC3F1	BC3F1_RBS_sd11_S13	0.4	14.44	7.11	BRD_C0109=5-646-10xBRD_C50[13-1014 x BRD_C10 [5-646-10 x [ 886 x (A. bat K9484 x A. sten V10309)4x] F2:7_T_F3:5]_F1:3]
BC3F1	BC3F1_RBS_sd26_S15	0.27	12.55	6.01	BRD_C0111=5-646-10xBRD_C56[13-1014 x BRD_C10 [5-646-10 x [ 886 x (A. bat K9484 x A. sten V10309)4x] F2:7_T_F3:5]_F1:6]
BC3F1	BC3F1_BRD_C0050_Seed9_S41	0.84	16.25	10.91	13-1014 x [13-1014 (= C1805-617-1 x GA-06G) x BRD_C0010 [5-646-10 x [Runner 886 x (A. batizocoi K9484 x A. stenosperma V10309)4x] F2:7_Tifton_F3:5]_F1:3]
BC3F1	BC3F1_RBS_sd11_S9	0.44	11.62	9.4	BRD_C0109=5-646-10xBRD_C50[13-1014 x BRD_C10 [5-646-10 x [ 886 x (A. bat K9484 x A. sten V10309)4x] F2:7_T_F3:5]_F1:3]
BC3F1	BC3F1_BRD_C0050_Seed9_S74	0.66	13.95	10	13-1014 x [13-1014 (= C1805-617-1 x GA-06G) x BRD_C0010 [5-646-10 x [Runner 886 x (A. batizocoi K9484 x A. stenosperma V10309)4x] F2:7_Tifton_F3:5]_F1:3]
BC3F1	BC3F1:C2633-2_3(16)_S36	0.87	15.87	11.28	5-646-10 x [ 5-646-10 x BC1F1:C2633-2_3 [5-646-10 x [Runner 886 x (A. batizocoi K9484 x A. stenosperma V10309)4x] F2:34_Tifton_F3:6]]
BC3F1	BC3F1_BRD_C0049_Seed8_S20	0.94	16.67	12.09	5-646-10 x [5-646-10 x BRD_C0010 [5-646-10 x [Runner 886 x (A. batizocoi K9484 x A. stenosperma V10309)4x] F2:7_Tifton_F3:5]_F1:3]
BC3F1	BC3F1_RBS_sd35_S1	0.15	11.13	4.28	BRD_C0130=13-1014xBRD_C58[13-2113x BRD_C10 [5-646-10 x [ 886 x (A. bat K9484 x A. sten V10309)4x] F2:7_T_F3:5]_F1:7]
BC3F1	BC3F1_BRD_C0050_Seed9_S25	0.31	11.19	7.24	13-1014 x [13-1014 (= C1805-617-1 x GA-06G) x BRD_C0010 [5-646-10 x [Runner 886 x (A. batizocoi K9484 x A. stenosperma V10309)4x] F2:7_Tifton_F3:5]_F1:3]
BC3F1	BC3F1_RBS_sd13_S11	0.3	13.23	5.63	BRD_C0110=5-646-10xBRD_C52[13-2113x BRD_C10 [5-646-10 x [ 886 x (A. bat K9484 x A. sten V10309)4x] F2:7_T_F3:5]_F1:4]
BC3F1	BC3F1_BRD_C0049_Seed8_S6	0.97	16.96	12.18	5-646-10 x [5-646-10 x BRD_C0010 [5-646-10 x [Runner 886 x (A. batizocoi K9484 x A. stenosperma V10309)4x] F2:7_Tifton_F3:5]_F1:3]
BC3F1	BC3F1_BRD_C0049_Seed1_S3	1	14.67	10.73	5-646-10 x [ 5-646-10 x BRD_C0010 [5-646-10 x [Runner 886 x (A. batizocoi K9484 x A. stenosperma V10309)4x] F2:7_Tifton_F3:5]_F1:3]
BC3F1	BC3F1_BRD_C0049_Seed1_S9	0.78	15.4	11.08	5-646-10 x [ 5-646-10 x BRD_C0010 [5-646-10 x [Runner 886 x (A. batizocoi K9484 x A. stenosperma V10309)4x] F2:7_Tifton_F3:5]_F1:3]
[truncated: 163 more rows]

[truncated: 3 more sheets: Table S10, Table S11, Table S12]
